# Supplementary material
Source: Research Square preprint supplement (doi:10.21203/rs.3.rs-9989528/v1)
Supplement: Supplementary file 2 [file 81f0482af3dd002703e090d7.xlsx]

## Sheet: Supplemental Table 1
Supplemental Table 1. Details of qRT-PCR primers used in this report.
Primer name		Primer sequence
HMGB1	HMGB1-F	ATGCTTCAGTCAACTTCTCAGA
	HMGB1-R	CATTTCTCTTTCATAACGGGCC
RAG1	RAG1-F	AAGCCATCACAGGGAGACA
	RAG1-R	TCCAGACAGCCCATCAATA
RAG2	RAG2-F	GCCAGGCTTCTCACTGATG
	RAG2-R	AGCGAAGAGGAGGGAGGTA
CD79a	CD79a-F	TGCCACCATCTTCCTCCTCTTC
	CD79a-R	TTCTCGTTCTGCCATCGTTTCC
CD79b	CD79b-F	AGGATTCAGCACCTTGGCAC
	CD79b-R	CACTTCACTTCCCCTGTCCG
VPREB3	VPREB3-F	CTTCTGATGGGGACCTTCCTG
	VPREB3-R	TCCGAGCGGTAGTAGAGGAGATA
HDAC9	HDAC9-F	GCAAAGATAGAGGACGAGAA
	HDAC9-R	TCTTGTGCTCCTGGTAATGT
HIP-1	HIP-1-F	CCAGCTTGCCAAAGACCAAC
	HIP-1-R	GCTCGATGCAGCTGGAAATG
ND1	ND1-F	ATACAACTACGCAAAGGCCCCA
	ND1-R	AATAGGAGGCCTAGGTTGAGGT
ND5	ND5-F	CTATAACCACCCTAACCCTGAC
	ND5-R	CGAACAATGCTACAGGGATGAA
GAPDH	GAPGH-F	ATTCCATGGCACCGTCAAGGCT
	GAPDH-R	TCAGGTCCACCACTGACACGT

## Sheet: Supplemental Table 2
Supplemental Table 2. Primers Used for Mouse Genotyping.
Primer name		Primer sequence
MH	MH-F	TGTGTAGCCCTGGCTGTAAC
	MH-R	TGACAACCGAGGTGGTGGTG
Cd19-Cre	CD19-Cre-P1	AGCGATGGATTTCCGTCTCTGG
	CD19-Cre-P2	AGCTTGCATGATCTCCGGTATTGAA
	CD19-Cre-P3	CCT CTC CCT GTC TCC TTC CT
	CD19-Cre-P4	TGG TCT GAG ACA TTG ACA ATC A
NRAS	NRASG12D-Primer 1	AGACGCGGAGACTTGGCGAGC
	NRASG12D-Primer 2	GCTGGATCGTCAAGGCGCTTTTCC
	NRASG12D-Primer 3	AGCTAGCCACCATGGCTTGAGTAAGTCTGCA

## Sheet: Supplemental Table 3
Supplemental Table 3. Differential Gene Expression Between MH and Vector Group
Gene Symbol	baseMean	log2FoldChange	lfcSE	stat	pvalue	padj
CFH	9.53579	6.65731	1.37503	4.84158	1.28811e-06	1.17522e-05
NIPAL3	983.926	-0.990425	0.147709	-6.70526	2.01043e-11	3.69938e-10
ENPP4	1907.76	0.741065	0.235629	3.14505	0.00166059	0.00738891
SEMA3F	534.682	-0.613406	0.213883	-2.86795	0.00413137	0.0161142
CYP51A1	112.989	0.738154	0.230118	3.20772	0.00133792	0.00610791
WNT16	35.0768	3.37703	0.436791	7.73147	1.06314e-14	2.75699e-13
HECW1	60.8303	-1.50713	0.538743	-2.79749	0.00515012	0.0193711
MAD1L1	55.9284	-1.27708	0.239879	-5.32385	1.01593e-07	1.12135e-06
SNX11	673.243	1.03845	0.315782	3.2885	0.00100724	0.00476445
KLHL13	1256.73	2.58157	0.301319	8.56754	1.05721e-17	3.59966e-16
ALS2	1995.07	0.906287	0.110354	8.21253	2.16572e-16	6.60037e-15
CFLAR	2639.71	1.10368	0.190418	5.79611	6.7871e-09	9.054e-08
TFPI	1432.17	2.24127	0.373317	6.00368	1.92898e-09	2.75495e-08
PLXND1	9427.1	-1.44856	0.168219	-8.61116	7.23225e-18	2.49673e-16
CD38	8349.25	-2.72959	0.149699	-18.2339	2.77685e-74	1.02469e-71
FKBP4	1979.01	-0.933346	0.177737	-5.25126	1.51058e-07	1.62463e-06
HSPB6	35.5751	-3.73812	0.438835	-8.51828	1.61934e-17	5.43904e-16
SLC22A16	599.961	-0.932466	0.150598	-6.19177	5.94909e-10	9.13164e-09
ABCB5	4.44822	5.55401	1.57713	3.5216	0.000428948	0.00224382
ARX	562.739	3.1901	0.319011	9.99995	1.52473e-23	7.87068e-22
ST7	139.515	1.52971	0.350504	4.3643	1.27528e-05	9.47079e-05
SKAP2	4500.77	0.828968	0.302697	2.7386	0.00617005	0.0226064
SLC25A5	8770.42	-1.06755	0.302257	-3.53192	0.000412555	0.00216688
MCUB	556.357	-1.62313	0.256076	-6.33848	2.32038e-10	3.76934e-09
REXO5	1145.99	-1.10501	0.345739	-3.19608	0.00139306	0.00632636
ATOSB	1786.43	1.84234	0.197875	9.31062	1.2709e-20	5.47387e-19
PRKAR2B	347.502	-1.92003	0.225963	-8.49712	1.94345e-17	6.44834e-16
CREBBP	9623.3	0.689128	0.152535	4.51783	6.24766e-06	4.97245e-05
TSPOAP1	15476.1	-1.56043	0.288109	-5.41609	6.09156e-08	6.98623e-07
MPO	1388.07	-2.2308	0.288216	-7.74004	9.93833e-15	2.58956e-13
WDR54	1250.34	-0.627309	0.121118	-5.17932	2.227e-07	2.33088e-06
CROT	555.552	0.922325	0.183568	5.02443	5.04924e-07	4.94902e-06
RHBDD2	1200.58	0.845308	0.258827	3.26592	0.0010911	0.00510972
ZNF195	3084.89	1.24878	0.229406	5.44353	5.22343e-08	6.05417e-07
FBXL3	1739.93	0.595636	0.189183	3.14846	0.00164135	0.00731853
REX1BD	1444.36	0.661219	0.203602	3.2476	0.00116382	0.00541219
OSBPL7	2707.37	1.39921	0.225888	6.19423	5.857e-10	8.99534e-09
TMEM132A	1989.92	3.71694	0.181499	20.4791	3.30517e-93	2.14891e-90
CACNA1G	265.61	-2.37735	0.585592	-4.05974	4.91266e-05	0.000320626
MAP3K9	552.796	-0.714757	0.124116	-5.75878	8.47263e-09	1.10806e-07
KDM7A	1127.76	0.761456	0.151794	5.01638	5.26553e-07	5.14624e-06
ETV1	40.1303	5.66725	0.95383	5.94157	2.82301e-09	3.96951e-08
GGCT	889.114	-1.31393	0.307251	-4.27642	1.89922e-05	0.000135969
DBF4	1756.44	-0.839463	0.242154	-3.46665	0.000526996	0.00268985
TBXA2R	269.376	2.47442	0.585264	4.22787	2.35911e-05	0.000165074
ARSD	1198.72	1.56921	0.149136	10.522	6.84188e-26	4.20791e-24
GAS7	3503.77	-1.73077	0.0928009	-18.6504	1.25369e-77	4.96152e-75
SCN4A	2130.55	-0.901825	0.291647	-3.09218	0.00198695	0.00863973
LUC7L	6593.65	0.914148	0.25917	3.52722	0.000419952	0.00220362
CACNA2D2	279.267	-1.44914	0.571998	-2.53347	0.0112939	0.0372511
BAIAP3	258.53	1.12363	0.455616	2.46617	0.0136567	0.0436985
PIGQ	1728.08	0.822822	0.0951945	8.64359	5.44721e-18	1.90457e-16
DNAJC11	2804.99	0.860071	0.287037	2.99638	0.00273204	0.0113002
E2F2	10857.8	-1.74773	0.154681	-11.299	1.32742e-29	9.90381e-28
JARID2	3056.75	0.852823	0.0978072	8.71943	2.7961e-18	1.00465e-16
CDKL5	307.929	0.751378	0.254989	2.94671	0.00321177	0.0129855
NADK	5523.58	-0.586955	0.133072	-4.4108	1.02991e-05	7.81641e-05
CYTH3	3428	-1.0353	0.188534	-5.49131	3.98968e-08	4.69798e-07
ADAM22	887.229	-0.676952	0.228721	-2.95973	0.00307908	0.0125213
SYPL1	2100.96	-0.610409	0.157	-3.88796	0.000101089	0.000619907
CYB561	145.614	1.47841	0.242689	6.09177	1.11666e-09	1.6447e-08
CELSR3	563.385	-1.06007	0.372927	-2.84257	0.00447519	0.0172386
MGST1	4.29583	2.8552	1.13421	2.51735	0.011824	0.0387099
ST3GAL1	2365.41	0.884748	0.184415	4.7976	1.60578e-06	1.44193e-05
MED24	5301.87	0.645778	0.142866	4.52017	6.17911e-06	4.92363e-05
RPS20	22137	-0.777403	0.207903	-3.73926	0.000184565	0.00106081
REV3L	2354.28	-0.897759	0.133178	-6.74106	1.57237e-11	2.92484e-10
PAX7	21.8997	-4.14352	0.765377	-5.4137	6.17343e-08	7.06826e-07
ETV7	218.15	-0.844298	0.151148	-5.58589	2.32505e-08	2.83438e-07
DYRK4	784.471	-1.65595	0.227669	-7.27348	3.50331e-13	7.75871e-12
CD9	2000.01	1.19144	0.313287	3.80304	0.000142934	0.000845192
HHATL	33.5897	8.47308	1.32881	6.37644	1.81254e-10	2.97983e-09
NCAPD2	14711.1	-1.74257	0.11386	-15.3044	7.14515e-53	1.38378e-50
IFFO1	3091.26	0.632813	0.110994	5.70131	1.18891e-08	1.51993e-07
PHF7	471.752	-1.97075	0.424516	-4.64234	3.44479e-06	2.88903e-05
SEMA3G	25.7442	-1.29495	0.457925	-2.82788	0.00468581	0.0179032
FUZ	1241.54	-0.916644	0.176977	-5.17946	2.22534e-07	2.33004e-06
SLC6A13	532.904	6.75371	1.2139	5.56366	2.6417e-08	3.18908e-07
IDS	246.325	1.1477	0.205165	5.59404	2.21848e-08	2.71659e-07
PRSS3	6.35692	2.35277	0.940129	2.50261	0.0123282	0.0400578
HFE	293.833	-0.809865	0.301861	-2.6829	0.00729857	0.0259745
SCMH1	2825.97	-0.882521	0.139242	-6.33803	2.32725e-10	3.77601e-09
FYN	2439.15	-0.725701	0.115396	-6.28881	3.19916e-10	5.09088e-09
LYPLA2	2087.04	0.919632	0.21589	4.25973	2.04676e-05	0.000145235
CLCN6	2928.35	0.908763	0.182235	4.98676	6.14008e-07	5.91627e-06
TSPAN9	2451.66	-1.20108	0.223074	-5.38422	7.27593e-08	8.2339e-07
PIK3C2A	2735.95	0.826259	0.117975	7.00366	2.49369e-12	5.08173e-11
PLAUR	1231.93	-1.12513	0.178726	-6.29532	3.06775e-10	4.89603e-09
ANLN	3477.83	-1.79535	0.12443	-14.4285	3.42362e-47	5.25217e-45
WIZ	4342.99	1.3698	0.210537	6.50624	7.70527e-11	1.32833e-09
TYROBP	12.708	3.95926	1.00804	3.92768	8.57684e-05	0.000534965
LDAF1	1610.41	-1.09786	0.184311	-5.95654	2.57638e-09	3.64713e-08
GABRA3	834.146	-2.38965	0.180423	-13.2447	4.84192e-40	6.17843e-38
BRCA1	4842.15	-1.56417	0.178065	-8.7843	1.57339e-18	5.7516e-17
ERCC1	2534.48	0.693265	0.138375	5.01006	5.44137e-07	5.30003e-06
SEMA3B	543.968	1.19519	0.452827	2.63939	0.00830548	0.0288563
PRICKLE3	436.589	0.639442	0.126547	5.05302	4.3488e-07	4.31671e-06
EXTL3	2491.68	0.640056	0.143548	4.45884	8.2406e-06	6.3946e-05
ELOVL5	6966.45	-0.908282	0.0868497	-10.4581	1.3454e-25	8.09224e-24
ALOX5	1601.05	-2.78534	0.221708	-12.5631	3.36782e-36	3.48353e-34
UBR7	5189.74	-1.09975	0.180391	-6.09647	1.08436e-09	1.60058e-08
EHD3	223.081	1.64894	0.228158	7.22718	4.9314e-13	1.073e-11
PSMC4	3267.35	0.915243	0.333782	2.74204	0.00610596	0.0224113
NUB1	3934.49	-0.590685	0.108779	-5.43016	5.63051e-08	6.49566e-07
POLR3B	515.393	1.7494	0.447646	3.90801	9.30606e-05	0.000575585
RNF14	1264.12	0.630817	0.206212	3.05907	0.00222028	0.00948369
DDX11	6849.68	-0.863298	0.18952	-4.55518	5.23418e-06	4.21871e-05
HEBP1	1157.47	-1.56625	0.108277	-14.4652	2.01016e-47	3.10122e-45
GPRC5A	19.3519	-2.54585	0.660544	-3.85417	0.000116122	0.000699831
MAMLD1	185.226	-1.16648	0.338564	-3.44537	0.000570283	0.00288437
CD6	19.1163	2.62552	0.549918	4.77439	1.80253e-06	1.60908e-05
TACC3	12198.6	-0.895324	0.091671	-9.76671	1.56452e-22	7.45591e-21
POLA2	1331.93	-1.2215	0.184683	-6.61406	3.73927e-11	6.69563e-10
CAPN1	7247.25	0.604372	0.107979	5.59715	2.1791e-08	2.67197e-07
ZMYND11	1586.55	1.26507	0.184742	6.84777	7.50121e-12	1.45171e-10
NUDCD3	4949.06	0.644581	0.215312	2.99371	0.00275608	0.0113789
CHDH	2.95055	4.96395	1.38924	3.57315	0.000352709	0.00188888
SLC38A5	4537.42	-0.784643	0.175163	-4.47949	7.48215e-06	5.87374e-05
RALBP1	6652.83	-0.676383	0.143466	-4.71457	2.42217e-06	2.10242e-05
RUFY3	3837.63	2.3474	0.282974	8.29545	1.08173e-16	3.39137e-15
CNTN1	85.0851	8.34768	1.95819	4.26296	2.01736e-05	0.000143383
SLC11A1	86.3762	1.91512	0.496982	3.85351	0.000116436	0.000701299
ATP1A2	27.8104	5.75327	2.10627	2.7315	0.00630461	0.0230253
ZNF582	52.0246	1.18834	0.348047	3.41432	0.00063941	0.00318562
PHLDB1	510.227	2.46896	0.291107	8.48129	2.22706e-17	7.34471e-16
MARCO	2.64661	4.80493	1.89791	2.5317	0.011351	0.0374124
PRDM11	253.99	2.64996	0.518402	5.1118	3.19111e-07	3.25512e-06
HGF	54.9348	3.94961	0.664811	5.94096	2.83364e-09	3.98153e-08
NCDN	1709.21	0.650204	0.18451	3.52396	0.000425148	0.00222661
RUNX3	9.0739	-3.09234	0.881778	-3.50693	0.0004533	0.00235552
MRE11	5408.29	-1.19653	0.124615	-9.60185	7.85248e-22	3.65294e-20
SPAST	1656.19	0.879385	0.135825	6.47441	9.51857e-11	1.62554e-09
NRXN3	9.10878	-3.09701	0.771721	-4.01312	5.99224e-05	0.000385012
OSBPL5	2228.02	-1.4287	0.171188	-8.34578	7.07472e-17	2.24639e-15
FHL1	2417.66	-0.893307	0.329904	-2.70778	0.00677348	0.0244337
GRAMD1B	1676.08	-1.27823	0.169162	-7.55628	4.14755e-14	1.00942e-12
ERP44	2990.74	1.05387	0.0939213	11.2207	3.22604e-29	2.34916e-27
DERA	1121.83	-0.646528	0.200312	-3.22761	0.0012483	0.00574924
PLEKHO1	4659.36	1.57911	0.267276	5.90818	3.45917e-09	4.80222e-08
GCLM	936.711	-0.979548	0.24817	-3.94709	7.91073e-05	0.000496945
CCDC28A	1042.26	-1.30507	0.162135	-8.04928	8.32849e-16	2.39901e-14
HSD17B6	428.087	-1.09408	0.361865	-3.02344	0.00249916	0.0104798
TYMP	144.058	-0.974237	0.208709	-4.66792	3.04268e-06	2.58595e-05
CD44	224.078	4.46342	1.08628	4.10889	3.9757e-05	0.000264985
KCNG1	4.98874	-3.71453	1.21749	-3.05096	0.00228108	0.00969787
MIPEP	371.841	-0.83734	0.310689	-2.69511	0.0070365	0.0251962
INSRR	437.658	1.49436	0.486432	3.0721	0.00212561	0.00913936
B4GALT7	951.431	1.3008	0.133061	9.77597	1.42782e-22	6.84026e-21
SH2D2A	140.543	2.76851	0.269036	10.2905	7.77774e-25	4.37911e-23
VRK2	608.889	-0.701306	0.193844	-3.61789	0.000297014	0.00162569
TNFRSF1B	746.782	-1.78269	0.247225	-7.21079	5.56294e-13	1.20561e-11
VEZT	5819.55	0.904011	0.144035	6.27633	3.46662e-10	5.49089e-09
POU2F2	719.397	1.77596	0.570141	3.11494	0.00183984	0.00808763
BMAL2	397.81	-0.644625	0.133236	-4.8382	1.31018e-06	1.19417e-05
BCLAF1	8331.85	0.61947	0.18014	3.43882	0.000584258	0.0029436
SLC39A9	5087.45	-0.655099	0.135301	-4.84177	1.28687e-06	1.17474e-05
ANK1	336.211	-1.64407	0.277098	-5.93319	2.97101e-09	4.15835e-08
TFB1M	479.348	-0.634555	0.166652	-3.80767	0.000140284	0.000831502
IKZF2	5323.86	-3.23704	0.28471	-11.3696	5.92478e-30	4.48166e-28
ARHGAP31	69.092	1.17883	0.32094	3.67305	0.000239673	0.00133867
CENPQ	912.75	-1.66629	0.166094	-10.0322	1.10088e-23	5.76999e-22
SARS1	7449.99	-0.974643	0.083468	-11.6769	1.67384e-31	1.39778e-29
ALG1	503.067	1.3985	0.354525	3.94472	7.98944e-05	0.000501535
ABCF2	787.754	1.39765	0.426152	3.2797	0.00103919	0.00489681
CHPF2	2313.67	2.43412	0.200827	12.1205	8.22245e-34	7.55995e-32
GAB2	3430.33	-2.38136	0.183328	-12.9897	1.40059e-38	1.62749e-36
TMSB10	15492.1	1.38906	0.233303	5.9539	2.61826e-09	3.7045e-08
VCL	7101.21	1.44397	0.113126	12.7642	2.5986e-37	2.86129e-35
DEPDC1B	1941.72	-0.96145	0.126275	-7.61392	2.65906e-14	6.59501e-13
STAP1	38.0166	2.41159	0.613725	3.92943	8.51468e-05	0.000531452
TIMP2	4213.9	-1.10287	0.0947075	-11.645	2.43329e-31	2.01351e-29
RFC1	7840.56	-1.19162	0.210096	-5.67178	1.41321e-08	1.78611e-07
MYOM2	11216.3	4.90954	0.423264	11.5992	4.15793e-31	3.36916e-29
METTL1	219.533	1.72025	0.582764	2.95189	0.00315837	0.0127942
HOXC8	17.6288	2.91835	0.651268	4.48102	7.42871e-06	5.83757e-05
AGA	263.908	1.0769	0.192496	5.59438	2.21411e-08	2.71245e-07
PI4K2B	2828.33	-1.01062	0.155181	-6.51254	7.38913e-11	1.27787e-09
VCAN	14.8003	1.7794	0.483637	3.6792	0.000233971	0.00131233
MSR1	2332.08	-0.909918	0.192935	-4.71618	2.40317e-06	2.08725e-05
RAI14	1180.39	-0.845731	0.192637	-4.39028	1.13205e-05	8.51359e-05
SOX30	6.45288	1.85329	0.767501	2.4147	0.0157481	0.0491524
SPDL1	2057.76	-0.915805	0.272054	-3.36626	0.000761947	0.00372676
INPP4A	4164.89	1.83439	0.104267	17.5932	2.77646e-69	8.71456e-67
LSG1	2454.9	1.40115	0.469476	2.98449	0.00284049	0.0116727
RIPOR3	15.9221	2.98601	0.805457	3.70723	0.000209537	0.00118809
TDP1	2140.23	-1.05271	0.116376	-9.04578	1.48598e-19	5.85319e-18
MED17	398.161	1.15655	0.137025	8.44038	3.16314e-17	1.03155e-15
RETSAT	1673.27	0.621924	0.0860183	7.23014	4.82502e-13	1.05321e-11
CAPG	1295.58	0.617243	0.211434	2.91932	0.00350799	0.0139945
TG	60.1845	5.25827	0.505361	10.405	2.35329e-25	1.40003e-23
ADAM28	100.744	4.12131	0.60005	6.86827	6.49834e-12	1.26569e-10
DCUN1D1	2945.84	0.921954	0.10625	8.67719	4.05661e-18	1.44237e-16
JADE2	2958.3	-0.989426	0.327153	-3.02436	0.00249162	0.0104514
TRIT1	1212.91	0.803403	0.224007	3.58651	0.00033513	0.00180442
ADRB1	116.544	-0.762463	0.26675	-2.85834	0.00425858	0.0165372
CUL7	2447	0.932882	0.301462	3.09453	0.00197124	0.00858375
CNTLN	1224.62	-1.28743	0.0952575	-13.5152	1.27158e-41	1.70211e-39
HSPA5	12309.1	1.87982	0.201723	9.31883	1.17633e-20	5.07459e-19
DSG2	1911.1	-1.34095	0.1806	-7.42497	1.12808e-13	2.651e-12
KATNIP	1261.97	0.848434	0.131212	6.46611	1.00556e-10	1.70871e-09
HDAC9	9748.93	3.89968	0.218559	17.8427	3.29604e-71	1.0844e-68
TSPAN17	1315.05	0.849974	0.152062	5.58965	2.27529e-08	2.78117e-07
COL9A2	1283.9	1.78999	0.580263	3.08479	0.00203698	0.00882497
VAMP3	1510.97	0.749295	0.180759	4.14526	3.39423e-05	0.000229535
PER3	1123.23	0.751169	0.112039	6.70455	2.02023e-11	3.71241e-10
TNFRSF9	39.1076	5.20869	0.734096	7.09539	1.28986e-12	2.69283e-11
EPN3	36.3642	2.07097	0.672867	3.07783	0.00208513	0.00899789
LTBP1	630.078	-0.990327	0.320622	-3.08877	0.00200987	0.00873107
RFC2	3454.32	-1.21283	0.265418	-4.56951	4.88877e-06	3.97196e-05
NEDD4L	828.807	-1.2864	0.30916	-4.16096	3.16914e-05	0.000215595
DKK3	13.1684	-2.01818	0.507488	-3.9768	6.98499e-05	0.000442859
ARHGEF5	85.3157	0.963568	0.273656	3.5211	0.000429765	0.00224691
NFE2L3	400.832	0.738839	0.136681	5.40559	6.45952e-08	7.36493e-07
MCUR1	1910.73	-0.669479	0.243529	-2.74907	0.00597641	0.0220359
LIMA1	1714.13	1.20153	0.400421	3.00068	0.00269381	0.0111682
SLC4A8	18.5782	3.44686	1.20811	2.8531	0.00432946	0.0167671
PTGER3	10.9972	2.3449	0.861568	2.72167	0.00649532	0.0235987
COL23A1	10.4199	1.94103	0.648874	2.99138	0.0027772	0.0114523
BCAR1	23.2065	3.56662	0.571088	6.2453	4.22987e-10	6.63822e-09
FHIP1B	1444.72	0.858816	0.163441	5.25461	1.4834e-07	1.59792e-06
HERPUD1	2334.44	0.676039	0.279319	2.42031	0.0155071	0.0485276
HOMER3	1071.12	1.4548	0.230568	6.30961	2.79742e-10	4.48557e-09
RAD51	1911.52	-1.94509	0.246831	-7.88024	3.26751e-15	8.90277e-14
POLQ	4072.27	-1.68394	0.168793	-9.97635	1.93452e-23	9.83721e-22
CYBA	6512.16	0.730707	0.189214	3.86179	0.000112557	0.000681659
HEBP2	218.945	0.709241	0.294267	2.41019	0.0159441	0.0496514
MPHOSPH9	3863.71	-0.728124	0.204237	-3.56509	0.000363734	0.0019407
RRP12	1653.66	1.45902	0.375324	3.88735	0.000101345	0.000621335
MSMO1	1646.56	1.10358	0.34167	3.22994	0.00123815	0.00570542
AKR7A2	1779.11	-0.731593	0.146297	-5.00072	5.71156e-07	5.53265e-06
NNAT	51.5998	1.01593	0.301422	3.37044	0.000750485	0.00367333
USE1	568.032	0.702879	0.125779	5.58822	2.29412e-08	2.80293e-07
LAMA3	7535.23	3.10179	0.762425	4.06832	4.73533e-05	0.000309942
KCNQ1	464.66	-2.50612	0.309146	-8.10659	5.20584e-16	1.5302e-14
ARID4B	2399.8	0.609529	0.139688	4.36352	1.27989e-05	9.49724e-05
OPN3	501.934	2.46431	0.305052	8.07833	6.56595e-16	1.91556e-14
SDCCAG8	1082.07	-0.672816	0.224126	-3.00195	0.00268254	0.0111342
SYNE2	7138.6	-0.689677	0.114528	-6.0219	1.72383e-09	2.47621e-08
ATP9A	491.196	-1.35662	0.209421	-6.47794	9.29853e-11	1.5893e-09
KCNH2	233.385	-1.16901	0.467241	-2.50194	0.0123514	0.0401285
USP36	2619.44	0.991722	0.33118	2.99451	0.00274886	0.0113543
ITIH4	11.4445	1.69515	0.510338	3.32163	0.000894947	0.00429194
TRAF1	871.116	1.25797	0.268461	4.68586	2.78792e-06	2.38352e-05
TRAF3IP2	1445.4	-1.4584	0.211989	-6.87959	6.00231e-12	1.17663e-10
DCBLD2	948.726	0.846193	0.193668	4.3693	1.24646e-05	9.28203e-05
SOAT1	1924.85	-0.614814	0.131446	-4.67731	2.90659e-06	2.47722e-05
MSH4	101.204	1.70457	0.279101	6.10736	1.0129e-09	1.5024e-08
CDK14	2957.68	-0.765222	0.124149	-6.16375	7.10408e-10	1.07953e-08
SEC61A1	11004.8	0.809295	0.080955	9.99685	1.57318e-23	8.09019e-22
CAMK2B	43.7713	3.2671	0.453177	7.20931	5.62361e-13	1.21779e-11
CROCC	1740.18	0.700527	0.178941	3.91485	9.04612e-05	0.000561032
ATP2B4	8102.06	-0.606545	0.117676	-5.15436	2.54503e-07	2.63646e-06
DGKG	435.706	2.61506	0.189919	13.7693	3.89889e-43	5.45985e-41
TBXAS1	74.8836	1.09056	0.337259	3.23361	0.00122235	0.0056421
TARBP1	19059.1	-1.34205	0.359323	-3.73493	0.000187767	0.00107808
DNAJC25	475.563	1.49719	0.184178	8.12903	4.32743e-16	1.28027e-14
SLC2A3	1455.68	1.3399	0.174471	7.67981	1.5932e-14	4.03575e-13
YBX3	4818.67	-0.781203	0.175448	-4.45262	8.48275e-06	6.56385e-05
STYK1	11.4788	-2.83483	0.783132	-3.61986	0.000294762	0.00161434
GNA15	6821.36	-1.08597	0.23589	-4.60374	4.14979e-06	3.42662e-05
COL11A1	24.2573	3.63298	0.831506	4.36915	1.24729e-05	9.28565e-05
MPC1	1394.84	1.67685	0.230486	7.27528	3.4571e-13	7.66882e-12
ACAA1	677.35	0.727162	0.184561	3.93996	8.14947e-05	0.000510876
BCAT1	14.4661	2.71418	0.716234	3.78951	0.000150945	0.000886423
HDAC7	11622.4	0.823864	0.0824003	9.99831	1.55012e-23	7.98665e-22
LZTS1	30.5275	2.02853	0.521397	3.89056	0.000100013	0.000613861
PRDM6	78.8638	2.18061	0.573926	3.79946	0.00014501	0.000855983
MON2	3501.83	0.676431	0.154476	4.37886	1.19299e-05	8.93499e-05
POLD1	5810.08	-1.2183	0.180534	-6.74827	1.49616e-11	2.78878e-10
SEZ6	36.5696	1.88982	0.582025	3.24698	0.00116636	0.00542126
EIF4B	21947.5	-1.18133	0.104258	-11.3309	9.2291e-30	6.9236e-28
SLC6A16	31.1017	-2.14456	0.578263	-3.70862	0.00020839	0.00118232
SPHK2	1584.84	1.51668	0.118717	12.7756	2.24515e-37	2.48212e-35
CASP8	1748.24	0.84554	0.17545	4.81925	1.44096e-06	1.30509e-05
LIMCH1	81.7465	3.73661	0.544087	6.86767	6.52581e-12	1.27014e-10
ST3GAL6	523.685	2.83502	0.376826	7.52342	5.33605e-14	1.2872e-12
RFXANK	1331.26	0.612603	0.21462	2.85436	0.00431236	0.0167103
CTSA	1508.68	0.818272	0.240499	3.4024	0.00066797	0.003314
SLC12A2	1663.39	2.03748	0.143328	14.2155	7.34293e-46	1.08975e-43
CNN2	4528.71	0.841786	0.182406	4.61489	3.93302e-06	3.26242e-05
CHI3L2	90.2476	-1.00634	0.358604	-2.80627	0.00501188	0.0189425
CALCRL	1422.44	4.50191	0.260216	17.3007	4.65021e-67	1.35088e-64
AP3D1	9168.35	0.673622	0.111578	6.03723	1.56786e-09	2.27128e-08
NHERF2	934.214	0.897591	0.242346	3.70376	0.000212427	0.00120289
IPO5	12927.7	-1.10854	0.28387	-3.90509	9.41902e-05	0.000581233
TRAM2	1340.72	-0.798857	0.186809	-4.27632	1.90009e-05	0.000135969
NTN1	439.791	-1.55744	0.223676	-6.96294	3.33255e-12	6.70611e-11
MCM10	4189.91	-1.45896	0.221574	-6.58453	4.56332e-11	8.0916e-10
ERBB3	456.594	4.0598	0.52501	7.73282	1.05194e-14	2.73055e-13
ANKRD44	2485.11	-1.18417	0.169578	-6.98303	2.88885e-12	5.8434e-11
MYLK	7451.58	1.0626	0.301894	3.5198	0.000431876	0.00225535
MAP2K4	1599.11	0.657417	0.146252	4.49511	6.95345e-06	5.48939e-05
TLE2	298.836	-1.44388	0.491228	-2.93932	0.00328935	0.0132345
TBC1D1	11905	0.844094	0.282651	2.98635	0.00282329	0.011616
MTHFD2	7766.23	-1.92222	0.148685	-12.9281	3.12276e-38	3.58291e-36
PPP2R5A	2594.87	0.83781	0.0888947	9.42474	4.31155e-21	1.9144e-19
CTNNA2	2.15766	4.50941	1.6306	2.76549	0.00568376	0.0211079
TIE1	579.64	1.61111	0.222845	7.22972	4.83974e-13	1.05558e-11
NGEF	5.49716	1.91254	0.784342	2.4384	0.0147523	0.0465981
ASPM	8549.39	-2.18541	0.217828	-10.0328	1.09424e-23	5.74624e-22
CD84	142.147	-0.795223	0.211806	-3.75449	0.000173698	0.00100597
PFKP	4530.06	-0.667264	0.220479	-3.02643	0.00247463	0.0103865
KLF6	3337.96	2.23126	0.116717	19.1168	1.82993e-81	7.93173e-79
PLPP1	163.291	2.12797	0.317062	6.71152	1.92605e-11	3.55609e-10
CACNB1	1467.03	1.03094	0.341324	3.0204	0.00252442	0.0105695
EVI5	628.235	0.941936	0.154487	6.09719	1.07948e-09	1.59423e-08
DHX29	1408.05	0.847709	0.240657	3.52248	0.000427533	0.00223738
PRKCZ	15.9041	1.58977	0.596045	2.66721	0.00764846	0.0269388
SYT1	1308.08	1.64372	0.257256	6.38944	1.6649e-10	2.7537e-09
NAV3	1524.18	2.38611	0.270326	8.82677	1.07743e-18	3.98664e-17
ROGDI	899.612	0.749609	0.157258	4.76674	1.87229e-06	1.66319e-05
ATP2B3	23.9004	1.93926	0.689432	2.81284	0.00491064	0.0186165
CBFB	4657.5	-0.799063	0.281086	-2.84277	0.0044723	0.0172341
HYAL2	242.697	1.37535	0.250366	5.49333	3.94423e-08	4.65048e-07
FGFR3	204.666	1.22026	0.276983	4.40554	1.0552e-05	7.98848e-05
PRR11	4404.28	-2.42702	0.105014	-23.1114	3.55462e-118	3.59504e-115
REEP1	875.132	5.59001	0.195268	28.6273	3.07356e-180	1.39883e-176
ATP11A	4245.32	0.643731	0.10887	5.91283	3.36274e-09	4.67548e-08
POLR1A	4027.58	1.49343	0.437711	3.41192	0.000645076	0.00321033
TTC7A	11509.2	-2.4358	0.15744	-15.4713	5.41976e-54	1.08027e-51
KIF2A	4664.48	-0.625352	0.111917	-5.58765	2.30159e-08	2.80955e-07
RASGRP2	7201.42	-1.52526	0.197945	-7.70545	1.30386e-14	3.34314e-13
PSME4	5548.39	1.04748	0.112182	9.33732	9.88011e-21	4.28248e-19
PPP2R5B	1230.53	0.915817	0.312994	2.92598	0.00343368	0.0137403
PYGM	110.302	-0.791673	0.224693	-3.52335	0.000426122	0.00223085
PITX1	309.248	-1.1592	0.334248	-3.46807	0.000524215	0.00267715
ADGRF5	28.2657	8.22449	1.11449	7.37963	1.58731e-13	3.64853e-12
SDK2	211.653	-2.11171	0.425839	-4.95895	7.08766e-07	6.75306e-06
NUCKS1	22456.8	-0.900992	0.192464	-4.68135	2.84986e-06	2.43039e-05
CLEC2D	967.333	-1.86193	0.327169	-5.69103	1.26272e-08	1.60752e-07
TGFBR3	1059.25	3.33884	0.242448	13.7713	3.79125e-43	5.33648e-41
NEDD4	1324.92	-0.781649	0.133965	-5.83473	5.38767e-09	7.3013e-08
GNB5	943.042	-0.716267	0.150601	-4.75606	1.97411e-06	1.7457e-05
RAB27A	1509.17	-1.61146	0.12263	-13.1408	1.92201e-39	2.35355e-37
NUCB2	5402.88	-1.12203	0.144017	-7.79096	6.65021e-15	1.75838e-13
SPTB	157.192	-1.28769	0.384724	-3.34705	0.000816757	0.00396149
SLC44A1	2478.48	-1.21942	0.0939437	-12.9803	1.58252e-38	1.82337e-36
DGCR2	3864.75	0.668384	0.148526	4.50012	6.79154e-06	5.37555e-05
MNT	1373.26	-0.602143	0.121976	-4.93658	7.95047e-07	7.52265e-06
GBA2	2933.83	1.08107	0.133973	8.0693	7.07021e-16	2.05608e-14
NDST1	4856.38	0.619077	0.157473	3.93133	8.44766e-05	0.000527751
PABPC1	52320.6	-0.673143	0.108131	-6.22528	4.80696e-10	7.47941e-09
CFAP20	1647.24	-0.665855	0.168139	-3.96014	7.49053e-05	0.000472279
CSNK2A2	2190.91	-0.633083	0.215273	-2.94083	0.00327332	0.0131843
CAMK2A	26.5516	2.98993	0.84578	3.53511	0.0004076	0.0021428
CDC42	228.427	1.23443	0.301798	4.09026	4.30893e-05	0.000284901
OSBPL3	1206.23	0.821098	0.126984	6.46616	1.00525e-10	1.70871e-09
RAD18	2371.17	-1.09372	0.279855	-3.90817	9.2997e-05	0.000575322
NCK2	2104.24	1.88226	0.107337	17.536	7.6048e-69	2.35982e-66
MAP4K4	13658.1	0.717034	0.149409	4.79912	1.59361e-06	1.43194e-05
MGAT4A	1479.79	-0.95208	0.159199	-5.98045	2.22517e-09	3.16308e-08
RPL31	19273.1	-0.83427	0.166709	-5.00435	5.60509e-07	5.44497e-06
WDR1	10573.1	0.975067	0.333592	2.92293	0.00346755	0.0138535
SNX13	2698.64	0.92772	0.15529	5.97411	2.31354e-09	3.28528e-08
RPS6KA2	761.235	1.21268	0.185857	6.52482	6.80811e-11	1.18413e-09
TRIP13	1635.39	-0.938596	0.348663	-2.69198	0.00710283	0.0253955
ATP6AP1	4196.37	1.1685	0.0904446	12.9195	3.49526e-38	3.97688e-36
TCF3	24030.3	-0.782032	0.0766375	-10.2043	1.89671e-24	1.04212e-22
HLTF	3868.61	-0.667093	0.195449	-3.41313	0.000642203	0.0031972
FAM50A	3018.38	0.81551	0.102373	7.96604	1.63846e-15	4.60775e-14
CYBRD1	166.512	-1.49124	0.21541	-6.92277	4.42903e-12	8.81512e-11
CDH19	31.018	7.63086	1.1799	6.46736	9.97302e-11	1.69678e-09
ADGRL1	5248.02	1.00164	0.227823	4.39658	1.09971e-05	8.29555e-05
EPN2	465.338	-0.833576	0.110289	-7.5581	4.08986e-14	9.96271e-13
LIMS2	342.111	2.1835	0.51068	4.27567	1.90566e-05	0.000136332
TFRC	9711.18	0.795148	0.303359	2.62115	0.00876342	0.0301465
UBE2D1	1223.66	1.82875	0.118521	15.4298	1.03175e-53	2.04159e-51
SMC1A	12503	-1.21879	0.225267	-5.41041	6.28815e-08	7.18755e-07
HMMR	2263.4	-2.57804	0.186622	-13.8142	2.09204e-43	2.95997e-41
P4HA2	697.345	1.61549	0.242032	6.6747	2.47737e-11	4.49499e-10
STK10	4871	0.655313	0.230304	2.84542	0.00443524	0.0171112
DERL2	1632.35	0.647957	0.189784	3.41417	0.000639755	0.00318675
NDE1	1692.13	-0.776885	0.113868	-6.82268	8.93546e-12	1.7159e-10
IRAG1	331.075	-1.74612	0.473569	-3.68714	0.000226789	0.00127689
SCARB1	3356.99	-0.699659	0.17241	-4.0581	4.94733e-05	0.000322272
MCM2	8499.99	-1.68898	0.31059	-5.43797	5.38905e-08	6.2329e-07
MOV10L1	9.42082	-2.49956	0.786703	-3.17726	0.00148672	0.00670978
PANX2	492.915	-1.48906	0.392381	-3.79492	0.000147689	0.000870483
TP63	1955.26	3.21562	0.471426	6.82105	9.03766e-12	1.7343e-10
PDE8A	1794.13	-0.735429	0.16638	-4.42019	9.86141e-06	7.51774e-05
SMARCE1	990.556	0.863306	0.121291	7.11765	1.09781e-12	2.31132e-11
FERMT2	1201.92	1.11706	0.212696	5.25189	1.50546e-07	1.62041e-06
ABCB11	1.76194	4.22114	1.65347	2.5529	0.0106831	0.0355155
IGF2BP2	645.573	1.0523	0.307659	3.42036	0.000625392	0.00312433
MAP3K13	199.656	-0.602493	0.190056	-3.17008	0.00152398	0.00685478
FRY	199.64	2.05393	0.625008	3.28624	0.00101535	0.00479607
NOTCH3	19.1818	2.38703	0.790142	3.02102	0.00251926	0.0105511
CLNS1A	2946.47	-0.913727	0.255048	-3.58256	0.000340238	0.00182747
CDHR2	67.7567	-0.966598	0.398337	-2.42658	0.0152417	0.0478452
NTN4	48.2504	3.16857	0.496389	6.38325	1.7337e-10	2.85882e-09
BCS1L	1707.04	0.620257	0.19309	3.21227	0.00131692	0.00602767
ZNF532	65.5656	3.63586	0.389738	9.329	1.06878e-20	4.61792e-19
SCARF1	2889.14	0.935324	0.133802	6.99038	2.74142e-12	5.55342e-11
IPCEF1	143.523	4.2442	0.338075	12.554	3.7787e-36	3.89377e-34
NOX3	4.58351	5.59756	1.77574	3.15225	0.00162019	0.00723865
SLC12A1	18.8679	-1.30669	0.465275	-2.80842	0.00497853	0.0188399
MYDGF	1177.14	0.637274	0.16511	3.85968	0.000113535	0.000687122
ARHGEF10L	10.3389	4.24243	0.989873	4.28583	1.82057e-05	0.000130827
TXK	180.4	2.48027	0.383894	6.46082	1.04136e-10	1.76624e-09
TIPIN	609.524	-0.80768	0.304905	-2.64895	0.00807413	0.0281764
EIF4G3	4212.7	0.59247	0.13639	4.34393	1.39959e-05	0.000102904
NUP37	827.454	-0.911872	0.256237	-3.55871	0.000372684	0.0019838
SEMA3A	1293.54	3.33802	0.172781	19.3193	3.69546e-83	1.71037e-80
GTSE1	3803.38	-1.44729	0.152272	-9.50467	2.00684e-21	9.11826e-20
CELSR1	42.191	1.14163	0.331414	3.44473	0.000571633	0.00289066
SLC25A40	2483.04	-1.29582	0.118254	-10.9579	6.08746e-28	4.12482e-26
VPS9D1	846.067	1.1822	0.200876	5.88522	3.97517e-09	5.49342e-08
FNDC3B	1787.94	1.6256	0.233102	6.97379	3.08504e-12	6.22181e-11
FOSL2	1925.1	3.7086	0.167282	22.1697	6.73831e-109	6.13344e-106
CACNG5	25.8867	3.1641	0.840701	3.76364	0.000167457	0.000972303
ACTB	97935.4	1.22956	0.430872	2.85366	0.0043219	0.0167449
WDR62	4481.62	-0.885279	0.128841	-6.87109	6.37143e-12	1.24364e-10
ARHGAP15	1738.78	-1.04699	0.146094	-7.16652	7.69297e-13	1.65151e-11
KIFAP3	1045.52	0.765044	0.125274	6.10695	1.0155e-09	1.50545e-08
MCM6	9961.06	-1.9951	0.19402	-10.283	8.40967e-25	4.72516e-23
RBMS2	725.695	0.670208	0.200503	3.34263	0.000829892	0.00401521
MLH1	870.477	-0.911382	0.180311	-5.05449	4.31548e-07	4.28831e-06
UNG	3055.03	-1.27777	0.398671	-3.20507	0.00135028	0.0061558
FMO4	55.287	1.77655	0.377857	4.70165	2.58069e-06	2.22727e-05
KLHL20	1905.24	1.60204	0.111843	14.324	1.54951e-46	2.35069e-44
PLXNA2	149.626	5.90456	0.657075	8.98612	2.5611e-19	9.87796e-18
SPAG5	5269.53	-0.999616	0.163792	-6.10296	1.04119e-09	1.54102e-08
ACACB	505.544	-0.784895	0.144681	-5.42498	5.79596e-08	6.67807e-07
TRAF4	2084.24	0.929761	0.220291	4.22061	2.43639e-05	0.000169937
PAG1	9984.38	-2.21401	0.166263	-13.3163	1.86137e-40	2.4204e-38
MCAM	141.177	1.55222	0.256332	6.0555	1.39983e-09	2.04085e-08
MBNL3	3150.03	-1.20236	0.230993	-5.20518	1.93807e-07	2.04652e-06
RAP1GAP	364.408	-0.78424	0.18364	-4.27053	1.95008e-05	0.000139218
STXBP2	304.112	0.744902	0.25134	2.96372	0.00303943	0.0123859
TOP2B	80292.7	-1.06759	0.200786	-5.31706	1.05455e-07	1.16256e-06
UBE2T	1922.84	-1.23245	0.167297	-7.36684	1.74725e-13	3.99266e-12
DNAJC10	5202.01	1.57435	0.192304	8.18675	2.68364e-16	8.11542e-15
GTF3C1	7896.15	0.650224	0.159631	4.07328	4.63556e-05	0.000304433
IL4R	450.862	-0.931292	0.220889	-4.2161	2.48562e-05	0.000172666
SNRPA	4829.54	-1.23421	0.143262	-8.61503	6.99207e-18	2.41993e-16
SPAG6	220.737	3.90466	0.69188	5.64356	1.66573e-08	2.08461e-07
APBB1IP	17870.4	-1.16087	0.136164	-8.52549	1.52169e-17	5.14268e-16
FAM76B	2950.56	-0.901816	0.146061	-6.17424	6.64817e-10	1.01533e-08
POLD3	2576.8	-0.976023	0.182752	-5.3407	9.25875e-08	1.02818e-06
ACTN2	32.304	-1.83275	0.428417	-4.27796	1.88611e-05	0.000135074
NAALAD2	212.645	0.894059	0.264432	3.38106	0.000722076	0.00354827
JADE1	1802.24	-0.786557	0.203031	-3.87408	0.000107029	0.000652229
FGFR1	6104.05	-1.23099	0.0900745	-13.6664	1.61273e-42	2.22418e-40
SMC1B	22.1404	1.43846	0.552436	2.60385	0.00921826	0.0314268
PIK3C3	5941.58	-0.989785	0.189858	-5.21329	1.85519e-07	1.9628e-06
TIGAR	488.348	2.96957	0.182928	16.2336	2.92022e-59	6.64521e-57
SYNJ2	1042.87	-0.988856	0.220482	-4.48498	7.29208e-06	5.74012e-05
EDN1	41.4136	2.49977	0.491331	5.08775	3.62346e-07	3.64441e-06
FGF20	16.5533	5.97686	1.48649	4.02078	5.80062e-05	0.000373755
ITCH	2293.4	0.837474	0.149035	5.61932	1.91712e-08	2.37527e-07
TP53INP2	2049.89	1.11108	0.147513	7.53207	4.99407e-14	1.20668e-12
SDF4	4631.64	0.69635	0.125757	5.53726	3.07245e-08	3.68141e-07
MYH7B	440.787	1.77	0.217463	8.13934	3.9744e-16	1.18095e-14
THOC1	3862.87	-0.642488	0.106302	-6.044	1.50342e-09	2.18488e-08
OSBPL6	17.554	7.53715	1.22227	6.16653	6.98044e-10	1.06133e-08
LXN	158.921	-0.774013	0.233111	-3.32037	0.000898987	0.0043098
SP140	75.8572	2.09578	0.238192	8.79868	1.38433e-18	5.06728e-17
MKNK1	1338.24	0.601426	0.128458	4.68191	2.8422e-06	2.42613e-05
TNS1	12603.8	-1.46104	0.261553	-5.58603	2.3232e-08	2.8334e-07
SAR1A	4271.39	0.789555	0.187012	4.22195	2.422e-05	0.000169064
CDC14A	580.222	-0.678052	0.15448	-4.38925	1.13741e-05	8.54683e-05
CEACAM1	181.59	1.10945	0.250119	4.43568	9.17833e-06	7.04618e-05
CIC	6138.86	0.698843	0.25362	2.75547	0.00586079	0.0216711
LIPE	747.801	-0.850227	0.14823	-5.73587	9.70134e-09	1.2585e-07
KIF22	6427.59	-1.09728	0.18705	-5.86624	4.45801e-09	6.12656e-08
CARMIL1	439.874	1.35263	0.291217	4.64474	3.40506e-06	2.86187e-05
PGM1	592.481	-0.766501	0.249812	-3.06832	0.00215267	0.0092455
RABL2B	975.441	0.91376	0.235286	3.88362	0.000102914	0.000629822
SLC35C2	1645.79	0.948221	0.0989906	9.5789	9.80823e-22	4.54726e-20
CRYBG3	463.125	5.84626	0.522775	11.1831	4.9317e-29	3.53464e-27
SCTR	5.99986	3.42448	1.25218	2.73481	0.00624154	0.0228316
RIF1	7727.45	-0.868189	0.129662	-6.69578	2.14518e-11	3.92617e-10
SLC4A4	1955.56	4.95953	0.337149	14.7102	5.54357e-49	9.23038e-47
SMARCA2	8339.24	-0.708076	0.15097	-4.69019	2.72956e-06	2.33655e-05
CHRNA3	66.5935	-0.801546	0.268907	-2.98076	0.00287537	0.0117983
MOK	212.786	1.75083	0.211043	8.29606	1.07619e-16	3.37787e-15
RBL1	1948.16	-0.968523	0.296221	-3.26959	0.00107702	0.0050507
DLGAP4	3017.2	1.52229	0.227516	6.69093	2.21762e-11	4.0452e-10
NDC80	3175.29	-1.81284	0.152375	-11.8973	1.22284e-32	1.08769e-30
AP4E1	1614.25	0.756875	0.123001	6.15341	7.58349e-10	1.146e-08
OSTM1	882.687	1.07951	0.152561	7.07595	1.48426e-12	3.07984e-11
PTPRC	7617.19	-0.689067	0.183542	-3.75428	0.000173844	0.00100661
UBA5	2837.09	0.644596	0.195621	3.29512	0.000983785	0.00466798
CDC14B	392.42	5.77391	0.541217	10.6684	1.43081e-26	9.04352e-25
JMJD4	154.122	1.24605	0.287966	4.32705	1.51118e-05	0.000110277
IFT25	1104.66	-0.767069	0.127649	-6.00923	1.86405e-09	2.6678e-08
PHLPP1	5810.24	0.779519	0.103995	7.49573	6.59301e-14	1.57926e-12
IL12RB2	33.3014	1.08278	0.38164	2.83719	0.00455128	0.0174848
SMARCD3	127.536	1.44183	0.424717	3.39482	0.000686748	0.00339483
ME2	4394.32	0.673568	0.119551	5.63414	1.75929e-08	2.19276e-07
EPB41L3	34.4568	8.50845	1.15714	7.35303	1.93761e-13	4.40919e-12
COBLL1	176.873	1.50103	0.209995	7.14794	8.80924e-13	1.88227e-11
NFE2L1	5363.78	0.782413	0.15993	4.89222	9.97029e-07	9.25735e-06
SEMA5B	18.6201	-2.63764	0.741277	-3.55824	0.000373343	0.00198666
ITGB5	41.3511	1.08226	0.360007	3.00624	0.00264504	0.0110023
TRPM3	8.33359	2.82403	0.958593	2.94602	0.00321896	0.0130075
TUT7	2013.51	0.771391	0.30027	2.56899	0.0101996	0.0341953
PLOD1	1224.8	1.13571	0.116108	9.78154	1.3514e-22	6.50791e-21
P2RX5	920.296	-1.00929	0.188494	-5.35449	8.57995e-08	9.5786e-07
OXCT1	1765.41	-0.715095	0.242276	-2.95158	0.00316157	0.012805
FAT1	34.4771	1.43299	0.558212	2.56711	0.0102549	0.0343638
ZMPSTE24	2054.63	1.58102	0.441099	3.58428	0.000338012	0.00181802
NOA1	2073.86	-1.31456	0.145006	-9.06555	1.23983e-19	4.91378e-18
SSH1	2180.52	0.827151	0.148985	5.5519	2.82587e-08	3.40689e-07
FAM234B	1283.49	-0.81185	0.0921307	-8.81194	1.23002e-18	4.52061e-17
NCOA1	2066.46	1.11021	0.152475	7.28129	3.30634e-13	7.35231e-12
AGBL5	2687.71	-0.865153	0.144201	-5.99962	1.97785e-09	2.82179e-08
EFR3B	866.316	1.32411	0.31924	4.14768	3.35865e-05	0.000227298
KIF3C	1797.96	0.80438	0.126604	6.35352	2.10444e-10	3.4308e-09
CD59	1428.36	-1.36514	0.105133	-12.9848	1.49207e-38	1.72644e-36
PILRA	177.539	0.742411	0.1756	4.22784	2.35941e-05	0.000165074
AKR1B1	4699.24	-0.70663	0.190619	-3.70703	0.000209708	0.00118881
RRN3	3262.83	0.79196	0.306006	2.58805	0.00965199	0.032648
CTTN	97.9348	5.07927	0.661261	7.68118	1.5763e-14	3.99665e-13
WNT11	185.716	1.70578	0.640945	2.66136	0.00778264	0.0273353
TTC39A	18.4943	2.64847	0.537787	4.92475	8.44701e-07	7.93745e-06
ORC1	3592.26	-1.87983	0.37505	-5.01221	5.3809e-07	5.24967e-06
MGST2	122.222	1.12606	0.20718	5.4352	5.47337e-08	6.31704e-07
POMGNT1	2354.25	0.977583	0.122701	7.96718	1.62335e-15	4.56997e-14
RAD54L	3092.59	-1.81955	0.138691	-13.1195	2.54739e-39	3.09163e-37
MAST2	5478.4	1.2795	0.292643	4.37222	1.22988e-05	9.17854e-05
HBQ1	2.72617	4.8489	1.49263	3.24856	0.00115992	0.00539496
ITPKC	475.116	1.00766	0.141612	7.11566	1.11382e-12	2.34322e-11
MYBPC2	16.8535	3.95961	1.05746	3.74445	0.000180788	0.0010424
PPP1R15A	2254.83	1.38529	0.313825	4.41422	1.01376e-05	7.70249e-05
ACHE	604.057	5.26956	0.444254	11.8616	1.87379e-32	1.63475e-30
SRRT	10254	0.744688	0.230376	3.2325	0.00122714	0.0056604
BAX	3228.05	0.616207	0.138636	4.44478	8.7981e-06	6.77906e-05
TMPRSS11E	3.23163	3.51884	1.37112	2.5664	0.0102761	0.0344136
ATXN7L3	4124.81	0.659598	0.128944	5.11537	3.13124e-07	3.19763e-06
PGS1	1452.89	0.589986	0.160408	3.67803	0.000235042	0.0013163
UIMC1	2101.9	-0.798129	0.169999	-4.69489	2.66751e-06	2.2899e-05
SH3BP2	1087.39	2.73746	0.489905	5.58774	2.3005e-08	2.80947e-07
TXNDC16	1548.27	-0.601183	0.126014	-4.77077	1.83525e-06	1.63401e-05
GNAS	46457.4	1.1207	0.109868	10.2004	1.97505e-24	1.08299e-22
PTHLH	22.7825	1.39849	0.48498	2.88359	0.00393168	0.0154212
PHACTR3	18.6705	2.64166	0.704148	3.75157	0.000175732	0.00101646
AURKA	2112.91	-2.00794	0.159639	-12.578	2.79086e-36	2.91993e-34
RFX2	533.911	-2.20177	0.17994	-12.2361	1.99294e-34	1.90284e-32
DNMT3B	1279.43	-1.23137	0.220005	-5.59701	2.18076e-08	2.6728e-07
TPX2	9475.47	-1.95422	0.193395	-10.1048	5.25976e-24	2.83851e-22
COQ9	1467.2	0.600684	0.222875	2.69517	0.00703537	0.0251962
CRLS1	244.462	0.779614	0.202503	3.84989	0.000118172	0.00071062
ATRN	2302.39	0.796483	0.0976819	8.15384	3.52541e-16	1.05442e-14
SLC4A11	396.971	-0.917108	0.377539	-2.42917	0.0151333	0.047564
DNAAF9	1587.73	0.696617	0.194432	3.58283	0.000339895	0.00182599
TESC	20.6556	-1.85884	0.477569	-3.89228	9.93054e-05	0.000609789
SNX5	13084.8	0.986698	0.208392	4.73481	2.19259e-06	1.92086e-05
P2RX7	640.901	0.838978	0.284428	2.9497	0.00318079	0.0128735
SLC8B1	1181.94	-0.852088	0.282253	-3.01888	0.00253708	0.010615
CFAP61	5.86245	4.46308	1.27237	3.50768	0.000452028	0.00235025
OAS1	565.591	-1.07038	0.134168	-7.9779	1.48842e-15	4.20749e-14
RPLP0	71226.7	-1.11355	0.255502	-4.35826	1.31098e-05	9.70949e-05
ERP29	3541.56	-0.858356	0.194422	-4.4149	1.01056e-05	7.68248e-05
FUS	30615.2	0.709461	0.127454	5.5664	2.6005e-08	3.14351e-07
IGBP1	2150.75	-1.06606	0.131777	-8.08994	5.96927e-16	1.74708e-14
FXYD5	2323.46	-0.762109	0.209867	-3.63138	0.000281906	0.00155046
GMIP	3865.92	0.620969	0.211765	2.93235	0.00336402	0.0134956
BIRC5	4034.25	-1.5477	0.287907	-5.3757	7.62863e-08	8.6045e-07
ZBTB25	1808.38	-1.0028	0.171421	-5.84989	4.91912e-09	6.70292e-08
ARHGAP4	4999.4	0.709502	0.205546	3.45179	0.000556872	0.00282544
LTBP4	13557.8	0.989301	0.345433	2.86394	0.00418403	0.0162893
BLVRB	922.649	-0.995391	0.147425	-6.75184	1.45981e-11	2.72848e-10
SLC9A1	1181.03	0.725339	0.248958	2.9135	0.00357406	0.0142166
PCBP4	1079.24	0.932504	0.149516	6.23681	4.46571e-10	6.97627e-09
NDUFB2	786.678	0.801238	0.321236	2.49424	0.0126228	0.0408815
MAEA	4148.96	0.729765	0.188409	3.8733	0.000107371	0.000653916
ICAM1	633.446	1.26211	0.214981	5.87079	4.33718e-09	5.97555e-08
MUL1	1140.86	1.07663	0.275573	3.9069	9.34893e-05	0.000577844
DNAJB11	1731.29	1.04495	0.141458	7.38699	1.50194e-13	3.46106e-12
THPO	60.2778	2.33647	0.759483	3.0764	0.00209518	0.00903127
RAB11FIP3	3873.33	0.660313	0.121895	5.41706	6.05867e-08	6.95465e-07
ZNF268	389.26	0.586633	0.148119	3.96055	7.47779e-05	0.000471584
GOLGA3	4620.62	1.11541	0.0786274	14.186	1.11854e-45	1.64216e-43
MCOLN1	607.574	0.591932	0.187689	3.15379	0.00161163	0.00720628
AARS1	13278.5	-0.948028	0.311108	-3.04726	0.00230935	0.00979368
GLG1	11360.2	1.5269	0.349665	4.36676	1.26104e-05	9.37523e-05
KIF4A	2963.5	-1.52832	0.154805	-9.87253	5.47651e-23	2.70919e-21
TNRC6A	5809.76	0.598809	0.121564	4.92585	8.39923e-07	7.90617e-06
PLEKHG2	10424.5	1.10775	0.124604	8.89017	6.10168e-19	2.29819e-17
NAT14	861.552	0.593387	0.141064	4.2065	2.59361e-05	0.000179346
NRCAM	45.1163	5.8467	0.654317	8.93558	4.0503e-19	1.53827e-17
ITGA6	1005.32	1.63759	0.546633	2.99577	0.00273749	0.0113176
MYO15A	45.5026	1.63704	0.408284	4.00955	6.0834e-05	0.000390043
ORC6	3811.66	-0.650101	0.110387	-5.88928	3.87877e-09	5.36291e-08
ZC3HC1	1049.93	0.64745	0.203796	3.17696	0.00148829	0.00671527
RGS17	149.877	-1.39338	0.40121	-3.47294	0.000514793	0.00263445
ANGPT2	10.284	2.10711	0.690786	3.05031	0.00228606	0.00971451
CCDC80	29.1207	3.52104	0.565321	6.22839	4.7126e-10	7.33677e-09
PSME1	6819.69	-0.665477	0.227108	-2.93022	0.00338724	0.0135683
HAUS4	1082.23	-2.04309	0.225419	-9.06351	1.2632e-19	4.99917e-18
SLC7A8	17.028	3.08834	0.634933	4.86403	1.15017e-06	1.05893e-05
SCFD1	2066.61	0.737747	0.145475	5.0713	3.95113e-07	3.94491e-06
G2E3	2103.29	-0.774815	0.163472	-4.73973	2.13998e-06	1.87838e-05
SUPT16H	15357.2	-0.862087	0.238788	-3.61026	0.000305889	0.00166758
DAZL	41.972	8.79339	1.06206	8.27957	1.23625e-16	3.85369e-15
TYRO3	1750.74	-1.53702	0.0825058	-18.6292	1.86202e-77	7.26376e-75
WDR76	3764.94	-2.04374	0.252564	-8.09197	5.87065e-16	1.72006e-14
PHGDH	13632.5	-1.95939	0.289621	-6.76537	1.32972e-11	2.50246e-10
COL9A3	1466.62	-1.4402	0.551591	-2.611	0.00902777	0.0308885
MYL6	4971.62	1.58278	0.274111	5.77424	7.73023e-09	1.02074e-07
CLSPN	2081.89	-0.997045	0.368723	-2.70405	0.00685002	0.0246382
RFFL	557.991	-0.658826	0.154152	-4.27386	1.92118e-05	0.00013737
TGFB2	119.818	6.05553	0.711665	8.50896	1.75502e-17	5.8659e-16
CDC45	3511.32	-1.31316	0.106065	-12.3807	3.32358e-35	3.2883e-33
	10.1691	1.67205	0.623646	2.68109	0.00733837	0.0260855
VNN3P	6.2011	2.80665	1.04521	2.68526	0.00724738	0.0258226
CDC6	3860.07	-1.17982	0.262787	-4.48965	7.13395e-06	5.62537e-05
CBX5	22405.9	-1.48646	0.15032	-9.88861	4.66459e-23	2.32015e-21
SUCO	2468.99	0.61934	0.166071	3.72937	0.000191959	0.00109915
MSH2	5695.35	-0.903293	0.194474	-4.6448	3.40401e-06	2.86186e-05
MAP3K1	3894.47	2.01514	0.254802	7.90866	2.60169e-15	7.17619e-14
TMEM38B	821.973	-1.07825	0.223935	-4.81501	1.47195e-06	1.33051e-05
PSMD5	1946.65	0.588705	0.240875	2.44402	0.0145245	0.0459849
PTGS1	489.231	1.07587	0.200639	5.36222	8.22059e-08	9.21551e-07
SH2D3C	3626.93	-1.2336	0.325461	-3.79032	0.000150454	0.000883915
WHRN	662.774	1.08278	0.395125	2.74036	0.00613715	0.02251
SEMA4G	446.981	0.692707	0.270057	2.56504	0.0103163	0.0345089
BLNK	4547.2	-1.77024	0.098464	-17.9785	2.87017e-72	9.67603e-70
TLL2	240.223	-1.06136	0.424929	-2.49773	0.012499	0.040555
BAMBI	892.976	2.92881	0.324326	9.03046	1.7095e-19	6.67829e-18
HIVEP1	1726.85	1.30785	0.112126	11.6641	1.94482e-31	1.61912e-29
BRPF3	3632.66	0.849074	0.196762	4.31522	1.59441e-05	0.000115766
ITPR3	5382.17	-1.84698	0.100873	-18.3099	6.89758e-75	2.616e-72
IFT74	111.389	0.989284	0.265201	3.73032	0.000191237	0.00109547
ABL1	6255.52	0.748309	0.217297	3.44371	0.000573782	0.00289968
CDC7	3763.32	-0.877379	0.214117	-4.09767	4.17331e-05	0.000277007
PCSK5	238.701	-1.1144	0.19262	-5.78547	7.23086e-09	9.59908e-08
ABLIM1	674.999	-1.09939	0.360752	-3.04748	0.00230769	0.00979325
ERMP1	1500.16	-0.862004	0.246942	-3.49071	0.000481732	0.00248481
NRP1	614.165	1.61423	0.245734	6.56904	5.06416e-11	8.95062e-10
WASHC2A	1804.22	0.622172	0.248608	2.50262	0.0123277	0.0400578
MZF1	2141.47	0.817506	0.114276	7.15377	8.44263e-13	1.80535e-11
STX1B	1097.74	-1.81538	0.508636	-3.56911	0.000358197	0.00191489
CIRBP	11730.3	0.758647	0.0836838	9.06565	1.23868e-19	4.91378e-18
CBARP	797.567	0.601908	0.24015	2.50638	0.0121973	0.039707
HNRNPM	14261	1.30937	0.469606	2.78824	0.00529956	0.0198648
MARCHF2	522.451	1.40436	0.15372	9.13582	6.49104e-20	2.64159e-18
CDC34	2121.59	0.735559	0.128884	5.70713	1.14896e-08	1.47299e-07
CEP170B	2080.69	0.83044	0.15678	5.29686	1.17813e-07	1.28839e-06
HCN2	52.8977	0.850478	0.322428	2.63773	0.00834639	0.0289636
CDHR5	83.0407	-1.47817	0.377488	-3.9158	9.01033e-05	0.000559066
IZUMO4	279.012	1.12786	0.194108	5.81051	6.22817e-09	8.35737e-08
ARVCF	2493.73	0.61058	0.167471	3.64588	0.000266475	0.0014745
CRKL	8872.01	-0.875808	0.197288	-4.43925	9.02737e-06	6.94004e-05
LZTR1	1331.89	1.31512	0.131764	9.98088	1.84828e-23	9.43382e-22
MMP11	1330.05	1.00682	0.154685	6.50883	7.57363e-11	1.30729e-09
CECR2	738.286	-2.29382	0.33633	-6.82014	9.09519e-12	1.74412e-10
DERL3	314.447	-1.40175	0.22458	-6.24164	4.33016e-10	6.78392e-09
DDTL	15.4881	-1.85261	0.652617	-2.83875	0.00452912	0.0174094
OSM	39.6371	-1.41652	0.421835	-3.35799	0.000785112	0.00382499
UPB1	46.054	2.28813	0.731111	3.12966	0.00175009	0.00773924
YPEL1	1305.29	-0.841541	0.264984	-3.17582	0.00149416	0.00673841
PES1	2629.89	1.33019	0.545882	2.43677	0.0148191	0.0467713
SLC35E4	138.429	1.00608	0.291879	3.44691	0.000567033	0.00287059
TOP3B	57.8928	0.917134	0.305826	2.99888	0.00270978	0.0112217
CYTH4	1408.87	1.31677	0.402084	3.27486	0.00105713	0.00496766
SLC25A1	3342.79	-0.658571	0.228627	-2.88054	0.00396989	0.0155532
GRK3	2340.35	-1.03864	0.259653	-4.00008	6.33203e-05	0.00040437
SEZ6L	22.7466	-2.21602	0.490433	-4.51851	6.22776e-06	4.95951e-05
LGALS1	3512.72	0.977631	0.18516	5.27992	1.29241e-07	1.40774e-06
HPS4	35621.3	-1.96823	0.213081	-9.23698	2.53548e-20	1.06846e-18
PIK3IP1	188.72	-0.761278	0.283728	-2.68313	0.00729367	0.0259672
SRRD	2050.99	-1.91	0.244329	-7.81733	5.39549e-15	1.43881e-13
EIF3L	9231.11	-1.15529	0.111342	-10.376	3.18703e-25	1.87157e-23
POLR2F	1007.55	0.920882	0.343101	2.684	0.00727474	0.0259065
PICK1	1445.51	1.70581	0.197179	8.65106	5.10219e-18	1.79081e-16
SLC16A8	477.76	1.98136	0.18358	10.7929	3.7188e-27	2.43523e-25
CENPM	1156.04	-1.38874	0.245018	-5.6679	1.44559e-08	1.82331e-07
KDELR3	16.1838	2.33655	0.568752	4.1082	3.98752e-05	0.000265579
DMC1	760.625	-0.758735	0.211738	-3.58337	0.000339186	0.00182326
CYB5R3	2298.12	0.886089	0.171847	5.15628	2.51907e-07	2.61155e-06
RHBDD3	1630.04	0.646456	0.222209	2.90923	0.00362324	0.0143871
RASL10A	32.2823	1.02248	0.346897	2.9475	0.00320355	0.012958
MCM5	12378.1	-1.29425	0.207445	-6.239	4.40365e-10	6.89114e-09
APOBEC3H	280.575	1.20801	0.494031	2.44522	0.0144764	0.0458698
ARSA	1705.07	1.09832	0.337649	3.25286	0.0011425	0.00532319
RASD2	537.324	1.60747	0.286664	5.6075	2.05273e-08	2.53065e-07
CBX7	759.759	-1.45326	0.433699	-3.35085	0.00080565	0.00391596
RPL3	72377.5	-1.06665	0.0933527	-11.426	3.10068e-30	2.39181e-28
RBFOX2	22282.5	4.30219	0.300823	14.3014	2.14453e-46	3.21762e-44
SYNGR1	3709.12	-1.27758	0.123453	-10.3487	4.24198e-25	2.45415e-23
ASCC2	2709.16	0.679383	0.266194	2.55221	0.0107041	0.0355722
APOL1	766.689	1.05234	0.294779	3.56992	0.000357092	0.00190979
CACNA1I	53.2904	2.03402	0.548818	3.70618	0.00021041	0.00119205
NCF4	5349.77	0.645309	0.107335	6.0121	1.83138e-09	2.62283e-08
CSF2RB	3120.7	1.59288	0.226402	7.03566	1.98319e-12	4.08717e-11
L3MBTL2	1184.12	1.02768	0.284002	3.61856	0.00029625	0.00162183
CHADL	24.5509	1.46562	0.477614	3.06862	0.0021505	0.00923767
RANGAP1	5559.71	-0.761206	0.197429	-3.85559	0.000115451	0.00069625
ZC3H7B	6470.93	0.678976	0.248583	2.73138	0.00630696	0.0230308
POLR3H	765.742	0.985257	0.379566	2.59574	0.00943867	0.0320176
PMM1	797.076	-0.996842	0.240128	-4.15129	3.30608e-05	0.000224185
BRD1	5163.03	0.600038	0.121202	4.95072	7.39394e-07	7.02283e-06
SDR39U1	426.72	0.687565	0.190152	3.61588	0.000299334	0.00163609
CTSG	48.9812	-1.39727	0.391508	-3.56895	0.000358417	0.0019157
AP4S1	468.514	0.919271	0.338453	2.7161	0.00660562	0.023923
POLE2	1147.04	-1.31039	0.120048	-10.9155	9.71687e-28	6.55157e-26
NIN	8271.62	0.691277	0.112945	6.12048	9.32967e-10	1.39064e-08
PYGL	1095.86	-1.67266	0.430669	-3.88387	0.000102805	0.000629299
TRIM9	392.993	-1.80399	0.210059	-8.588	8.84975e-18	3.03212e-16
CDKN3	875.482	-2.06733	0.198801	-10.399	2.50521e-25	1.48717e-23
KIAA0586	2331.72	-0.728668	0.117545	-6.19908	5.67959e-10	8.74746e-09
TMED8	2256.25	-0.743692	0.101257	-7.34457	2.06427e-13	4.68569e-12
SAMD15	34.8826	1.92088	0.621557	3.09043	0.00199864	0.00868781
DAAM1	1496.02	0.730752	0.119221	6.12937	8.82268e-10	1.32012e-08
SPTLC2	2484.7	-0.663287	0.200891	-3.30172	0.000960945	0.0045763
RIN3	354.076	1.33566	0.190559	7.00914	2.39784e-12	4.8937e-11
LGMN	853.682	0.943106	0.3003	3.14055	0.0016863	0.00748381
SNW1	3844.12	-0.609091	0.16618	-3.66524	0.000247102	0.00137594
DHRS7	1234.35	0.965763	0.184378	5.23795	1.6237e-07	1.74012e-06
SIX4	558.404	0.822313	0.25705	3.19904	0.00137885	0.0062712
ASB2	79.3926	0.971914	0.35717	2.72116	0.0065054	0.0236259
SLC10A1	8.2196	2.45959	0.745772	3.29804	0.000973616	0.00462697
MTHFD1	4661.03	-1.16906	0.344037	-3.39805	0.000678686	0.00335984
VRK1	3242.11	-1.40614	0.18859	-7.45611	8.91125e-14	2.11232e-12
ACIN1	16019.6	0.590576	0.136631	4.32241	1.54337e-05	0.000112326
CCNB1IP1	2972.16	-0.720361	0.107654	-6.69143	2.21002e-11	4.03402e-10
DHRS2	6.24663	2.80605	0.943868	2.97292	0.00294978	0.0120538
PCK2	3043.77	-1.74376	0.435216	-4.00666	6.15837e-05	0.000394564
NFKBIA	2283.22	-0.823718	0.0966644	-8.52142	1.5761e-17	5.30032e-16
EMC9	362.573	-0.613574	0.139922	-4.38511	1.15928e-05	8.69919e-05
BRMS1L	922.514	1.54072	0.24528	6.28147	3.35391e-10	5.32163e-09
REC8	206.562	0.926228	0.238637	3.88132	0.000103891	0.000634808
TM9SF1	148.45	0.71405	0.293613	2.43194	0.0150181	0.0472899
NFATC4	5858.48	-1.12416	0.421108	-2.66954	0.00759548	0.0267833
PYGB	2631.49	0.775256	0.215384	3.59941	0.000318944	0.0017308
GINS1	2995.85	-1.13109	0.253285	-4.46567	7.98174e-06	6.21847e-05
MYBL2	8184.07	-1.35042	0.361925	-3.73121	0.000190559	0.00109227
NFATC2	364.593	-0.913831	0.180522	-5.06215	4.14547e-07	4.12989e-06
SALL4	1310.11	-0.925318	0.382642	-2.41823	0.0155962	0.0487506
CTSZ	151.709	1.04614	0.271266	3.85649	0.000115027	0.000694462
TUBB1	46.7205	1.37709	0.370475	3.7171	0.000201524	0.0011479
MTG2	1175.87	0.950637	0.244696	3.88498	0.000102339	0.000626947
SLCO4A1	1354.93	-1.33882	0.311849	-4.29318	1.76136e-05	0.00012694
NTSR1	972.617	-0.665955	0.164951	-4.0373	5.40705e-05	0.000349717
TCFL5	2166.21	-1.3115	0.11051	-11.8677	1.74227e-32	1.52978e-30
BIRC7	1237.47	1.04981	0.14357	7.31217	2.62871e-13	5.90314e-12
NKAIN4	697.665	1.88224	0.408463	4.60812	4.06331e-06	3.36131e-05
ARFGAP1	10964.2	1.63954	0.208005	7.88218	3.21714e-15	8.77626e-14
COL20A1	32.449	1.71272	0.476951	3.59098	0.000329434	0.00177819
CDC25B	4388.1	-1.17158	0.101236	-11.5728	5.66069e-31	4.51978e-29
ISM1	203.85	-1.02789	0.159327	-6.45143	1.10801e-10	1.87462e-09
NDUFAF5	832.119	0.905017	0.144606	6.25849	3.88714e-10	6.12499e-09
TRIB3	1965.27	-0.717882	0.140084	-5.12464	2.98103e-07	3.04994e-06
RSPO4	25.1647	1.9427	0.518846	3.74427	0.000180922	0.00104295
CDS2	6310.58	-0.619758	0.147071	-4.214	2.50889e-05	0.000174194
HM13	3236.57	0.89774	0.247403	3.62865	0.000284902	0.00156535
SNPH	108.541	2.0729	0.386695	5.36057	8.29592e-08	9.2919e-07
CCM2L	241.011	-3.41658	0.315659	-10.8237	2.65963e-27	1.75004e-25
PLCB4	99.2684	6.58143	0.587406	11.2042	3.88742e-29	2.81575e-27
HCK	2303.07	-2.09397	0.226359	-9.25066	2.23115e-20	9.47528e-19
SAMHD1	543.957	-0.815653	0.162796	-5.01026	5.43555e-07	5.29723e-06
KIF3B	1377.6	0.985953	0.242143	4.07178	4.6656e-05	0.000305817
MROH8	195.018	-1.33118	0.353613	-3.76451	0.000166879	0.000969774
SNTA1	442.299	-1.06656	0.18508	-5.76271	8.27725e-09	1.08562e-07
E2F1	9435.88	-1.74177	0.0965292	-18.0439	8.80745e-73	3.04437e-70
CHMP4B	2789.36	0.653682	0.22807	2.86614	0.00415508	0.0161905
CST3	533.184	0.966873	0.155003	6.23777	4.43856e-10	6.9418e-09
AHCY	5226.09	-0.661524	0.25316	-2.61306	0.00897342	0.0307372
FAM83D	770.875	-1.1162	0.252101	-4.42759	9.52928e-06	7.28897e-05
APMAP	2469.07	0.905975	0.198278	4.56921	4.89575e-06	3.97645e-05
ZNF516	2601.37	1.55317	0.400526	3.87782	0.000105397	0.000643435
METTL4	1135.29	-0.820392	0.171882	-4.77299	1.81509e-06	1.61817e-05
LPIN2	1970.51	-0.610385	0.118472	-5.15213	2.57548e-07	2.66396e-06
MYOM1	2670.48	7.47683	0.304295	24.571	2.57958e-133	4.14357e-130
MYL12A	2735.69	1.19976	0.106407	11.2752	1.74018e-29	1.2843e-27
CEP192	3528.25	-0.938624	0.147285	-6.37284	1.85561e-10	3.04514e-09
MIB1	16072.6	-1.06336	0.124875	-8.51539	1.66034e-17	5.56305e-16
RBBP8	2152.53	-0.869236	0.242592	-3.58313	0.000339507	0.00182462
POLA1	2653.26	-0.95195	0.201173	-4.73199	2.22329e-06	1.94401e-05
MID1	298.883	-1.68662	0.155407	-10.8529	1.93137e-27	1.28321e-25
PRPS2	1365.05	-1.60827	0.218682	-7.35436	1.91844e-13	4.37287e-12
STAG2	10218.7	-1.22261	0.146288	-8.35753	6.40432e-17	2.04541e-15
MCF2	36.2779	1.35152	0.403707	3.34778	0.000814616	0.0039552
ABCD1	1382.76	0.870022	0.138525	6.2806	3.37268e-10	5.34831e-09
SYP	58.353	-0.880117	0.296278	-2.97058	0.00297237	0.0121379
NAA10	1115.64	0.920033	0.111208	8.27306	1.30565e-16	4.06074e-15
RENBP	750.849	0.658939	0.178454	3.69248	0.000222073	0.00125215
MTMR8	132.476	-0.711863	0.193179	-3.68499	0.00022871	0.00128612
ZC3H12B	618.691	0.616813	0.139768	4.41311	1.01897e-05	7.73778e-05
RBBP7	7784.71	-0.833399	0.176359	-4.72559	2.29449e-06	1.99986e-05
SLC25A14	653.613	0.838804	0.178113	4.70939	2.48464e-06	2.15322e-05
SCML2	2533.13	-1.31423	0.0872423	-15.0642	2.78608e-51	5.106e-49
SLC35A2	786.751	1.02671	0.11568	8.87542	6.96698e-19	2.60256e-17
SMS	2438.86	-1.27384	0.233474	-5.45602	4.86927e-08	5.66292e-07
EEA1	1930.6	0.653176	0.0917472	7.1193	1.08475e-12	2.2909e-11
JADE3	1681.07	-0.711303	0.204675	-3.47528	0.000510325	0.00261355
PCYT1B	3.53487	5.22498	1.35449	3.85752	0.000114545	0.000692318
TIMP1	580.702	0.795255	0.224661	3.53981	0.000400421	0.00211005
KLHL4	33.4394	2.30563	0.447926	5.14734	2.64204e-07	2.72558e-06
PCDH11X	9.13417	6.59532	1.22914	5.36581	8.05862e-08	9.05285e-07
FGD1	577.425	-0.948196	0.31176	-3.04143	0.00235458	0.0099638
PORCN	545.07	1.52893	0.314766	4.85734	1.18972e-06	1.09239e-05
MAGED2	3266.22	1.2466	0.429477	2.90261	0.00370072	0.0146564
RBM3	5870.73	1.31762	0.455679	2.89155	0.00383349	0.0150968
CENPI	1369.21	-1.05482	0.124125	-8.49805	1.92804e-17	6.405e-16
DRP2	426.059	-1.04751	0.28248	-3.70825	0.000208694	0.0011838
TAF7L	87.1842	3.36766	0.459026	7.33654	2.19185e-13	4.96292e-12
HTR2A	38.9043	8.68512	1.18831	7.30882	2.69493e-13	6.03695e-12
NDFIP2	27.7451	-2.42343	0.442733	-5.4738	4.40496e-08	5.15365e-07
TNFSF13B	47.784	1.43378	0.436265	3.28649	0.00101443	0.00479257
FNDC3A	3942.58	1.00274	0.173063	5.79409	6.8692e-09	9.15904e-08
CAB39L	191.541	1.29031	0.202648	6.36724	1.92459e-10	3.14887e-09
KLF5	398.809	2.35388	0.531376	4.42979	9.43238e-06	7.22902e-05
STK24	3657.34	-0.976003	0.190391	-5.12632	2.95464e-07	3.02862e-06
DNAJC3	1675.82	0.791685	0.147537	5.36601	8.04977e-08	9.04962e-07
FGF9	142.997	1.20645	0.265702	4.54063	5.60858e-06	4.4979e-05
FLT1	645.758	1.90803	0.15096	12.6393	1.28175e-36	1.36721e-34
RGCC	36.2834	-2.04436	0.425939	-4.79966	1.58937e-06	1.42907e-05
VWA8	1128.06	7.50279	0.384425	19.5169	7.88493e-85	3.84489e-82
DGKH	11202.8	2.40742	0.256608	9.38169	6.49208e-21	2.85934e-19
KATNAL1	1779.54	-0.826972	0.135474	-6.10427	1.03273e-09	1.52933e-08
CLN5	316.458	1.287	0.18383	7.00099	2.54152e-12	5.16378e-11
MGRN1	5005.53	0.837465	0.140683	5.95284	2.63522e-09	3.7227e-08
ZNF629	3619.2	0.684513	0.192008	3.56502	0.000363831	0.00194083
ELMO3	366.031	1.04701	0.161954	6.46486	1.01393e-10	1.72186e-09
PHKB	3707.87	0.748372	0.173316	4.31795	1.57486e-05	0.000114526
LYRM1	789.146	-0.822618	0.157153	-5.23449	1.65438e-07	1.76709e-06
TSNAXIP1	147.41	1.70259	0.321294	5.29917	1.16331e-07	1.27372e-06
PLLP	75.8582	0.767636	0.249742	3.07371	0.00211413	0.00910001
ACD	1870.16	-0.799822	0.096037	-8.32826	8.20362e-17	2.60182e-15
MMP15	1085.48	-0.995722	0.213797	-4.65731	3.2036e-06	2.70754e-05
CFAP263	161.317	0.833917	0.246076	3.38886	0.00070184	0.00346004
NDRG4	20.3045	1.33419	0.547083	2.43874	0.0147385	0.0465707
SLC38A7	843.68	1.92253	0.282203	6.81259	9.58549e-12	1.83427e-10
SLC7A6	1281.91	0.778696	0.137526	5.66217	1.49472e-08	1.88181e-07
PLA2G15	798.164	1.47622	0.273151	5.4044	6.50246e-08	7.39844e-07
CMC2	619.432	-0.774404	0.144786	-5.34862	8.8625e-08	9.86581e-07
HCFC1R1	1225.67	-1.00155	0.15335	-6.53114	6.5273e-11	1.13674e-09
TAF1C	5582.44	0.81762	0.148017	5.52381	3.3172e-08	3.95558e-07
NAGPA	311.891	1.19151	0.330716	3.60281	0.000314796	0.00171067
COTL1	564.963	-0.790174	0.200359	-3.94379	8.02025e-05	0.000503122
TSC2	7534.86	0.794561	0.121406	6.54465	5.96334e-11	1.04385e-09
ZNF500	980.632	0.767054	0.234048	3.27734	0.00104791	0.00492686
NOMO3	337.527	1.02749	0.299559	3.43002	0.000603544	0.00303015
LMF1	677.669	1.17	0.183703	6.369	1.90271e-10	3.11681e-09
CIAO3	2914.8	-0.646319	0.12985	-4.97742	6.44372e-07	6.18701e-06
HAGHL	545.848	-0.842984	0.207625	-4.06012	4.90466e-05	0.00032018
ANTKMT	429.979	0.986562	0.182083	5.41821	6.02e-08	6.91578e-07
SLC7A5	10422.4	-1.66741	0.204713	-8.14508	3.79029e-16	1.12993e-14
FBXO31	1596.71	1.17621	0.171021	6.87756	6.08879e-12	1.19187e-10
EEF2K	2178.04	-0.74382	0.117399	-6.33585	2.36037e-10	3.82519e-09
CAPN15	4991.01	0.719267	0.268825	2.67559	0.00745975	0.0264166
PIEZO1	11665.1	-0.95309	0.152384	-6.25453	3.98725e-10	6.26467e-09
UBFD1	3357.17	0.699511	0.184238	3.79679	0.000146584	0.000864529
BFAR	2394.45	-0.639436	0.227765	-2.80744	0.00499366	0.0188814
RBL2	3855.73	-0.856131	0.19041	-4.49624	6.91662e-06	5.46663e-05
QPRT	9149.31	0.827962	0.185245	4.46955	7.83852e-06	6.11911e-05
XYLT1	3152.55	1.19731	0.198359	6.03608	1.579e-09	2.285e-08
MAZ	2111.78	-0.755959	0.203694	-3.71125	0.00020624	0.00117158
NOMO1	2215.56	1.08916	0.184103	5.91604	3.29793e-09	4.58771e-08
CCP110	4739.49	-1.27538	0.102315	-12.4653	1.15429e-35	1.16742e-33
AAGAB	1686.16	0.850849	0.296942	2.86537	0.00416525	0.0162231
LACTB	459.112	-0.694545	0.153913	-4.51257	6.40477e-06	5.08564e-05
TRIP4	982.205	0.713088	0.214018	3.3319	0.000862538	0.00415403
RASL12	146.202	1.08786	0.269513	4.03638	5.42816e-05	0.000350915
GOLGA8UP	16.5	-1.87484	0.5883	-3.18688	0.00143817	0.00651173
TTC23	142.477	-0.666048	0.214702	-3.10219	0.00192093	0.00839547
EHD4	255.616	1.54466	0.526037	2.93641	0.00332037	0.0133455
CEP152	3981.19	-1.77621	0.121114	-14.6656	1.07062e-48	1.74021e-46
ATP8B4	64.3183	6.96353	0.833556	8.354	6.59906e-17	2.10269e-15
TGM5	53.4446	3.8136	0.778539	4.89841	9.66137e-07	8.99062e-06
BMF	1549.94	1.08011	0.167711	6.44031	1.19232e-10	2.00856e-09
SLC30A4	1285.77	-0.805591	0.24171	-3.33288	0.000859514	0.00414092
ZFAND1	1561.22	-0.946997	0.178261	-5.31241	1.08182e-07	1.1907e-06
CA2	361.275	-0.923786	0.15751	-5.86495	4.49272e-09	6.16805e-08
INTS9	1346.28	0.59718	0.113339	5.26899	1.37177e-07	1.48646e-06
RIPK2	626.425	-0.889857	0.234504	-3.79464	0.000147857	0.000871097
POP1	956.63	1.06015	0.412961	2.5672	0.0102523	0.0343594
NIPAL2	8.05437	4.91793	1.31738	3.73312	0.000189126	0.00108474
JPH1	704.758	-2.54354	0.233979	-10.8708	1.58807e-27	1.06028e-25
STK3	2266.52	1.35179	0.155248	8.7073	3.11186e-18	1.11663e-16
EIF3E	17482.1	-0.994265	0.0943524	-10.5378	5.78437e-26	3.57361e-24
SPAG1	149.729	-1.21024	0.203713	-5.94091	2.83447e-09	3.98153e-08
NCALD	170.415	2.39222	0.230591	10.3743	3.24689e-25	1.90264e-23
SNX16	658.234	-1.44044	0.17246	-8.35228	6.69603e-17	2.1311e-15
PYCR3	344.314	1.14925	0.389076	2.9538	0.00313886	0.0127247
SQLE	2625.45	0.671864	0.136157	4.93447	8.03687e-07	7.59124e-06
SH2D4A	9.56482	4.08754	1.61279	2.53446	0.0112622	0.03716
LEPROTL1	1549.35	0.712887	0.239282	2.97927	0.00288933	0.0118502
R3HCC1	1435.24	1.07542	0.306155	3.51267	0.000443635	0.00230969
TNFRSF10A	243.179	-0.770113	0.206794	-3.72406	0.000196048	0.00112115
ARHGEF10	67.8315	-1.1066	0.238778	-4.63445	3.57894e-06	2.98961e-05
MCM4	12943.9	-1.62105	0.310475	-5.22119	1.77781e-07	1.88531e-06
KCTD9	1425.04	-1.25138	0.120769	-10.3617	3.7017e-25	2.15988e-23
ASAH1	1757.36	0.749561	0.151273	4.95502	7.23229e-07	6.88126e-06
BNIP3L	3667.71	-0.643297	0.225667	-2.85065	0.004363	0.0168786
KCNN4	1568.86	0.80495	0.114773	7.01339	2.32609e-12	4.75795e-11
DHDH	66.0192	-1.60823	0.394845	-4.07307	4.63979e-05	0.000304565
GYS1	3636.72	1.31009	0.088607	14.7854	1.82081e-49	3.10755e-47
TUBB4A	2277.18	0.709642	0.1427	4.97296	6.59398e-07	6.31796e-06
SNRNP70	30806.5	0.81248	0.151929	5.34777	8.90435e-08	9.90835e-07
CLPTM1	3854.88	1.13003	0.237216	4.76373	1.90051e-06	1.68578e-05
RELB	503.85	1.09894	0.308109	3.56671	0.000361487	0.00192909
FCGRT	1176.77	0.832933	0.275912	3.01884	0.00253743	0.010615
PIH1D1	2919.86	-0.893604	0.123082	-7.26021	3.86496e-13	8.49761e-12
ARHGEF18	11244.5	-0.75603	0.286991	-2.63433	0.00843035	0.0291924
PPP1R13L	780.111	-1.14121	0.266092	-4.28879	1.79652e-05	0.000129201
SLC17A7	1326.27	-1.5889	0.156592	-10.1468	3.42532e-24	1.85955e-22
KLC3	220.239	-1.19161	0.241463	-4.93495	8.01712e-07	7.58045e-06
CD37	419.257	-1.86103	0.347901	-5.3493	8.82938e-08	9.83696e-07
TRMT1	1937.78	1.23104	0.454032	2.71135	0.00670108	0.0242206
IL4I1	212.343	1.44378	0.278334	5.18722	2.13456e-07	2.23842e-06
YJU2B	2613.53	0.719512	0.16157	4.45324	8.45827e-06	6.54677e-05
NOVA2	8.75798	5.04004	1.35063	3.73161	0.000190256	0.00109077
SNAPC2	794.278	-0.680405	0.194041	-3.5065	0.000454047	0.00235895
ASF1B	4861.38	-1.62455	0.300592	-5.40449	6.49939e-08	7.39803e-07
TNNT1	1706.97	-0.803823	0.131567	-6.10963	9.98629e-10	1.48365e-08
C19orf44	327.073	0.712654	0.180925	3.93895	8.18394e-05	0.000512801
RASAL3	1169.44	1.07114	0.227975	4.6985	2.62076e-06	2.25544e-05
RPS16	16667	-0.690654	0.286051	-2.41444	0.0157594	0.0491779
DYRK1B	135.742	1.34708	0.220268	6.11565	9.61621e-10	1.43101e-08
PLD3	3445.72	1.18545	0.181852	6.51876	7.089e-11	1.23064e-09
EBI3	17.8636	4.46892	0.74133	6.02825	1.6574e-09	2.38958e-08
TBCB	2577.94	0.701967	0.207624	3.38095	0.000722364	0.00354905
CACTIN	1825.62	0.93213	0.229318	4.06479	4.80756e-05	0.000314293
DENND3	9405.05	-1.32844	0.174226	-7.6248	2.44415e-14	6.09521e-13
RPS19	31396.6	-0.626669	0.213291	-2.93809	0.00330238	0.013281
NOP53	17713.5	-0.893861	0.145944	-6.12469	9.08611e-10	1.35872e-08
NKG7	543.396	1.64821	0.479321	3.43864	0.000584644	0.00294446
CD33	96.7367	1.15498	0.297533	3.88186	0.000103662	0.000633693
CDC37	9663.72	0.777779	0.0986604	7.8834	3.18603e-15	8.7001e-14
NAPA	1464.46	0.635497	0.260168	2.44264	0.0145802	0.0461292
ATP1A3	501.18	-1.12759	0.142522	-7.91168	2.53941e-15	7.01859e-14
CNFN	17.0425	-1.49292	0.496729	-3.00551	0.00265139	0.0110217
MEGF8	4883.63	0.864991	0.0973557	8.88485	6.40099e-19	2.40429e-17
CLEC11A	2390.05	0.997109	0.171158	5.82567	5.68823e-09	7.67055e-08
LIG1	5915.03	-1.68536	0.108559	-15.5249	2.35429e-54	4.72711e-52
PLA2G4C	93.778	2.66694	0.5202	5.12676	2.9477e-07	3.02264e-06
HAS1	19.7627	1.55839	0.485655	3.20885	0.00133267	0.00608955
DBP	614.816	-0.96889	0.12668	-7.6483	2.03658e-14	5.13033e-13
FAM83E	35.4376	1.85594	0.579156	3.20457	0.00135266	0.00616338
RASIP1	193.942	-1.03044	0.245963	-4.18942	2.79674e-05	0.000191886
TNPO2	8723.71	0.682823	0.134712	5.06878	4.00372e-07	3.99451e-06
KLF1	34.2136	-2.74243	0.475236	-5.77067	7.8956e-09	1.04157e-07
MAST1	1854.33	-0.960873	0.272117	-3.5311	0.00041383	0.00217316
JAK3	3488.42	1.17689	0.10246	11.4864	1.54409e-30	1.21511e-28
RPL18A	27478.2	-0.9113	0.280636	-3.24727	0.00116519	0.00541673
ARRDC2	3381.1	-0.748739	0.0829705	-9.02416	1.81085e-19	7.04401e-18
CRTC1	1713.49	1.23979	0.202919	6.10977	9.9773e-10	1.48354e-08
DDX49	1491.9	1.25527	0.420139	2.98774	0.00281047	0.0115689
ETV2	46.2622	-0.740865	0.305176	-2.42766	0.0151965	0.0477252
TMEM59L	168.957	1.14243	0.373036	3.06253	0.00219473	0.00939809
ATP13A1	4141.99	0.713127	0.158645	4.49512	6.953e-06	5.48939e-05
CADM4	1279.87	1.79486	0.176505	10.1689	2.72996e-24	1.48796e-22
CDK6	19642.5	-1.38843	0.199555	-6.95764	3.46017e-12	6.95779e-11
DNAJC2	1453.96	1.13003	0.2594	4.35631	1.32271e-05	9.78045e-05
NAMPT	2124.79	-0.906376	0.139318	-6.5058	7.72817e-11	1.33144e-09
SP4	1861.97	-1.87897	0.105832	-17.7542	1.59966e-70	5.13906e-68
WDR91	2023.07	0.967819	0.125397	7.71804	1.18136e-14	3.04908e-13
CAV1	189.414	-1.38315	0.418942	-3.30154	0.000961565	0.00457846
MET	462.721	6.15463	0.352522	17.4588	2.94876e-68	8.84855e-66
RNF32	93.0706	-0.997287	0.248011	-4.02113	5.79187e-05	0.00037328
HOXA1	398.748	0.846081	0.242909	3.48312	0.000495613	0.00254872
LFNG	671.586	-1.37275	0.36139	-3.79852	0.000145563	0.000859066
IQCE	1041.06	1.551	0.223686	6.93381	4.09669e-12	8.17153e-11
HOXA13	546.921	-2.1016	0.222007	-9.4664	2.89659e-21	1.30308e-19
CPED1	260.339	3.15603	0.352589	8.95103	3.52195e-19	1.34509e-17
HIBADH	1083.66	-0.989051	0.156535	-6.31842	2.64257e-10	4.25476e-09
CPVL	19.8865	6.23209	2.24304	2.77841	0.00546264	0.0203949
CHN2	46.8714	3.44545	0.540783	6.37123	1.87524e-10	3.07366e-09
COBL	305.202	5.65681	0.432227	13.0876	3.87639e-39	4.58236e-37
HSPB1	3241.8	0.647077	0.120085	5.3885	7.10501e-08	8.06387e-07
PTCD1	141.178	0.66517	0.244024	2.72584	0.00641377	0.0233365
ZKSCAN1	7758.83	0.888526	0.159291	5.578	2.43294e-08	2.95404e-07
NUDT1	1246.36	-0.949461	0.215916	-4.39737	1.0957e-05	8.26987e-05
PTPRZ1	11.6555	1.80897	0.716896	2.52334	0.0116246	0.0381575
PLOD3	1981.52	0.933811	0.148892	6.27174	3.57044e-10	5.65206e-09
RPA3	1107.31	-1.56234	0.249114	-6.27158	3.5741e-10	5.65458e-09
GLCCI1	6937.82	1.82345	0.388018	4.69939	2.60943e-06	2.24923e-05
EZH2	12223.6	-1.12412	0.143256	-7.84693	4.26333e-15	1.14925e-13
CEP41	1508.48	-0.796755	0.193961	-4.10782	3.9941e-05	0.000265952
GIMAP2	657.718	-1.26196	0.366807	-3.4404	0.000580863	0.0029292
MRPL32	1858.21	0.72581	0.103996	6.97921	2.96851e-12	5.99564e-11
YKT6	3442.82	1.18006	0.220343	5.35554	8.52997e-08	9.53061e-07
CLIP2	7966.15	-0.722998	0.157493	-4.59067	4.41824e-06	3.622e-05
LHX2	75.6754	-1.10735	0.416992	-2.65556	0.00791762	0.0276975
FSD1L	803.654	-0.691751	0.168839	-4.09711	4.18332e-05	0.000277536
PRUNE2	448.011	-1.03002	0.222154	-4.63653	3.5431e-06	2.96511e-05
TRIM14	1640.6	-1.39457	0.238365	-5.85059	4.89841e-09	6.67803e-08
CORO2A	307.339	-2.19075	0.261879	-8.36551	5.98579e-17	1.91847e-15
SEC61B	1733.22	0.839766	0.331331	2.53452	0.0112601	0.037159
C5	826.826	-2.41968	0.221797	-10.9094	1.03899e-27	6.98808e-26
ECM2	96.4259	1.38368	0.290473	4.76356	1.90208e-06	1.68637e-05
SUSD1	718.288	1.52338	0.133014	11.4528	2.27782e-30	1.76706e-28
AMBP	383.351	-3.0107	0.373172	-8.06786	7.15429e-16	2.07832e-14
TBC1D13	2148.38	1.07607	0.0998462	10.7773	4.40558e-27	2.86436e-25
RIC1	5304.21	0.636325	0.193198	3.29364	0.000988973	0.00468934
DOCK8	5734.98	-0.821429	0.129268	-6.35446	2.09154e-10	3.41384e-09
NCS1	764.775	7.93186	1.09443	7.24746	4.24656e-13	9.29918e-12
FUBP3	3513.43	0.70042	0.233408	3.00084	0.00269239	0.0111649
TYRP1	10.8597	6.84384	1.13835	6.01207	1.83167e-09	2.62283e-08
PIP5K1B	187.874	0.830804	0.160435	5.17845	2.23733e-07	2.3408e-06
RAPGEF1	9390.21	1.24553	0.178491	6.97808	2.99252e-12	6.03967e-11
APBA1	13.5305	5.69956	1.2138	4.69564	2.65773e-06	2.28294e-05
SH3GL2	3.14852	5.05529	1.94337	2.60131	0.0092869	0.0316127
SHB	69.3116	1.7827	0.378717	4.70722	2.51119e-06	2.17347e-05
ABHD17B	3838.6	-0.596606	0.13513	-4.41506	1.00984e-05	7.67912e-05
ZFAND5	5364.68	0.917235	0.146343	6.26769	3.66434e-10	5.78728e-09
DVL1	3063.88	0.585893	0.0865065	6.77282	1.26296e-11	2.38338e-10
PDLIM1	1030.32	-1.31935	0.124691	-10.581	3.65181e-26	2.28192e-24
CCNJ	1703.26	1.2018	0.207592	5.78926	7.0699e-09	9.39912e-08
DNTT	29391.2	-1.85329	0.0747658	-24.788	1.20873e-135	2.35762e-132
GATA3	996.707	3.61994	0.199623	18.1339	1.72179e-73	6.10608e-71
ATRNL1	523.718	-2.2577	0.29224	-7.72549	1.11427e-14	2.88411e-13
HPS1	817.098	0.675583	0.157732	4.28312	1.84292e-05	0.000132329
ERLIN1	1968.92	-0.78066	0.230744	-3.38323	0.000716377	0.00352344
PKD2L1	23.4901	1.5012	0.444729	3.37553	0.000736748	0.00361321
MAPK8	4198.07	1.59773	0.178391	8.95635	3.35611e-19	1.28355e-17
PALD1	2056.34	1.66145	0.287498	5.77898	7.51551e-09	9.95367e-08
CDH23	410.203	-2.24205	0.342589	-6.54441	5.97305e-11	1.04488e-09
MINPP1	7.72588	3.78738	1.20699	3.13789	0.0017017	0.00754479
KAZALD1	1626.35	-0.754393	0.106084	-7.11125	1.14995e-12	2.41738e-11
FBXW4	1079.26	0.679083	0.104476	6.49991	8.03692e-11	1.38289e-09
GBF1	7951.59	0.702091	0.129405	5.42555	5.77771e-08	6.65986e-07
SUFU	2361.77	0.68523	0.105493	6.49548	8.2769e-11	1.42149e-09
PITRM1	2106.11	0.807372	0.154836	5.21435	1.84458e-07	1.95233e-06
MAP3K8	1289.86	3.06687	0.124679	24.5982	1.31899e-133	2.2511e-130
DKK1	83.757	3.50229	0.640512	5.46795	4.55261e-08	5.31501e-07
SORCS1	28.4092	6.77506	1.14458	5.91927	3.23373e-09	4.50528e-08
SMC3	8027.68	-0.744829	0.130944	-5.68816	1.28414e-08	1.63249e-07
UBE2S	5342.53	-0.884019	0.1917	-4.61148	3.99818e-06	3.31446e-05
RPL28	17977.7	-0.89912	0.237147	-3.7914	0.000149802	0.000881035
ZMIZ1	9857.38	-1.02125	0.331186	-3.08362	0.00204496	0.00885391
PBLD	641.191	0.949456	0.150895	6.29216	3.13075e-10	4.99075e-09
NUFIP2	15375.3	-0.846268	0.207624	-4.07596	4.58253e-05	0.000301312
RPL19	34910.4	-0.786934	0.233405	-3.37154	0.00074749	0.00366261
CSF3	2.77914	4.87527	1.96368	2.48272	0.0130385	0.0419911
RGS9	1115.02	-1.55247	0.451661	-3.43724	0.000587667	0.00295805
RNF43	451.89	-1.67691	0.27351	-6.13108	8.72842e-10	1.30744e-08
SEPTIN4	134.299	-1.08708	0.416639	-2.60917	0.00907634	0.0310275
GOSR2	1745.73	0.817627	0.147959	5.52605	3.27512e-08	3.90881e-07
GALK1	1710.92	-0.618002	0.233985	-2.6412	0.00826123	0.0287412
RASD1	1715.13	-0.983172	0.362802	-2.70994	0.00672946	0.0243103
CHRNE	53.5544	1.63526	0.412603	3.96327	7.39292e-05	0.000466663
DRG2	1789.38	0.74691	0.162198	4.60494	4.12586e-06	3.41065e-05
FTSJ3	3427.35	0.888354	0.283355	3.13513	0.00171779	0.00760624
UTP6	2201.09	0.651804	0.246578	2.6434	0.00820785	0.0285919
DDX5	57280.4	0.842311	0.0922364	9.13209	6.71896e-20	2.72622e-18
LGALS3BP	9379.64	1.11568	0.223143	4.99982	5.73827e-07	5.55459e-06
CCL1	7.05808	3.67029	1.32313	2.77395	0.00553797	0.0206395
RAB5C	943.998	0.698638	0.258288	2.70487	0.00683303	0.0245966
PPP1R9B	3606.34	0.622408	0.142865	4.35661	1.32093e-05	9.77256e-05
COL1A1	791.892	-1.24771	0.478368	-2.60827	0.00910019	0.0310973
VAT1	2179.83	-0.715861	0.249272	-2.8718	0.00408136	0.0159331
HDAC5	9418.74	1.15712	0.121191	9.54788	1.3238e-21	6.0857e-20
MPP2	290.123	-0.780019	0.225643	-3.45687	0.000546485	0.00277841
SMURF2	1271.73	0.847007	0.180449	4.69388	2.68067e-06	2.29758e-05
PRKAR1A	10756.7	0.594142	0.0777529	7.64142	2.14837e-14	5.39205e-13
EFNB3	81.912	2.7269	0.750672	3.63261	0.000280574	0.00154406
MAP2K6	1257.57	-0.834955	0.153985	-5.42232	5.88305e-08	6.76817e-07
WSB1	12940.8	1.3569	0.451791	3.00337	0.00267006	0.0110875
TMEM104	1118.99	1.19663	0.223445	5.35537	8.53801e-08	9.53568e-07
TNFAIP1	1281.59	0.673512	0.109569	6.14693	7.89945e-10	1.1898e-08
PMP22	442.144	-1.12347	0.130567	-8.60451	7.66448e-18	2.63927e-16
UNC119	1384.66	0.953923	0.131281	7.26626	3.69573e-13	8.15181e-12
SUPT6H	7742.56	0.851467	0.235053	3.62245	0.000291823	0.00159856
PHOX2B	20.2471	6.27814	1.19647	5.24721	1.54417e-07	1.65749e-06
TMEM33	2965.34	0.701118	0.283523	2.47288	0.013403	0.0429975
GABRA4	16922.6	0.67406	0.212367	3.17403	0.00150337	0.00677016
USP46	1361.01	0.789876	0.146149	5.40461	6.49494e-08	7.39605e-07
ELF2	2356.65	-0.664174	0.134297	-4.94558	7.59194e-07	7.20087e-06
TBC1D9	817.035	0.746088	0.226152	3.29906	0.000970104	0.00461268
INPP4B	85.0078	2.74345	0.290798	9.43421	3.93957e-21	1.75781e-19
KLHL2	1362.1	1.19441	0.118851	10.0496	9.22219e-24	4.86159e-22
RPL34	11402.8	-0.754754	0.19158	-3.93963	8.16072e-05	0.000511464
WFS1	734.018	0.596028	0.125644	4.7438	2.09751e-06	1.84406e-05
FRG1	1799.83	-0.782275	0.234644	-3.33388	0.000856449	0.00412761
TRIM2	775.841	1.78302	0.262703	6.78719	1.14336e-11	2.17271e-10
FBXW7	6384.4	1.16913	0.31544	3.70636	0.000210261	0.00119145
NEIL3	823.577	-1.95342	0.190023	-10.2799	8.68492e-25	4.8698e-23
NSD2	17849	-1.04823	0.138121	-7.58921	3.21866e-14	7.90394e-13
STIM2	9363.31	0.701531	0.096921	7.23817	4.54787e-13	9.93509e-12
MFSD10	2052.5	0.630436	0.0967841	6.51384	7.32542e-11	1.26765e-09
GLRB	10.3747	6.77801	1.18915	5.69988	1.19893e-08	1.53202e-07
RAPGEF2	6667.99	2.19821	0.132348	16.6093	5.97308e-62	1.46943e-59
LRP2BP	131.481	0.881655	0.28941	3.04639	0.00231609	0.00982071
FAM149A	29.818	-2.1546	0.706523	-3.04958	0.00229162	0.0097366
NCAPG	5443.02	-1.94555	0.0966886	-20.1218	4.75429e-90	2.82229e-87
PPARGC1A	286.003	4.62345	0.372746	12.4038	2.49279e-35	2.48433e-33
DDX25	25.251	-1.15346	0.389522	-2.96121	0.00306436	0.0124689
CTSC	5489.19	2.33757	0.224579	10.4087	2.26309e-25	1.3493e-23
CCDC34	1169.01	-1.42032	0.230554	-6.16046	7.25361e-10	1.10041e-08
TECTA	71.5123	1.64119	0.42526	3.85925	0.000113735	0.000688029
CRTAM	9.1601	5.11302	1.48442	3.44446	0.000572199	0.00289245
VWA5A	152.756	1.55149	0.473386	3.27744	0.00104753	0.00492622
DTX4	3255.86	-1.95536	0.213882	-9.14226	6.116e-20	2.50014e-18
KMT5B	4251.81	1.30071	0.114628	11.3472	7.65343e-30	5.75736e-28
NRXN2	3446.41	-1.08618	0.152592	-7.11823	1.09321e-12	2.30341e-11
MS4A4A	1061.38	4.36195	0.828451	5.26519	1.40046e-07	1.51335e-06
TRIM3	817.263	0.630041	0.164416	3.832	0.000127105	0.00075899
CHORDC1	2684.03	0.706704	0.116932	6.04371	1.50606e-09	2.18755e-08
CEP164	1473.86	0.586776	0.102913	5.70168	1.18629e-08	1.51729e-07
EIF4G2	29715.7	1.24539	0.326809	3.81076	0.000138541	0.000822067
PDHX	1826.83	1.32606	0.229554	5.77669	7.61825e-09	1.00693e-07
SLC15A3	406.555	0.823753	0.144243	5.71086	1.12407e-08	1.4448e-07
SOX6	50.8297	1.57012	0.341007	4.60436	4.13731e-06	3.41735e-05
TCIRG1	1958.9	0.832563	0.251438	3.3112	0.000928955	0.00443867
CHKA	1105.71	0.776763	0.152182	5.10417	3.32245e-07	3.37398e-06
POU2AF1	5300.39	-2.00155	0.267248	-7.4895	6.91373e-14	1.65318e-12
PSMD9	313.861	0.590477	0.219051	2.69562	0.00702572	0.0251729
CD69	870.844	1.74577	0.21158	8.2511	1.56938e-16	4.85336e-15
PRDM4	1265.16	1.1547	0.187971	6.14298	8.09866e-10	1.21846e-08
ASIC1	1320.44	-0.850529	0.302199	-2.81446	0.00488585	0.0185457
KCTD10	3102.75	0.870257	0.22617	3.8478	0.000119184	0.000716074
CSRNP2	1680	1.49375	0.182395	8.18964	2.61998e-16	7.93169e-15
CAMKK2	4700.01	1.88163	0.323151	5.82275	5.78883e-09	7.80235e-08
LIN7A	18.6687	2.10247	0.791475	2.6564	0.00789808	0.0276575
TNS2	102.734	1.31531	0.321828	4.08699	4.37014e-05	0.000288599
GLI1	325.494	-2.58882	0.415943	-6.22398	4.84689e-10	7.53296e-09
PPM1H	1355.46	1.00118	0.225397	4.44184	8.91934e-06	6.86859e-05
LTA4H	5101.42	-1.07036	0.102214	-10.4717	1.16472e-25	7.03653e-24
ELK3	2718.39	-1.44955	0.171452	-8.45456	2.80132e-17	9.17214e-16
SLC6A12	93.9515	9.95642	1.91515	5.19876	2.00623e-07	2.11195e-06
ITFG2	931.903	0.960999	0.273019	3.5199	0.000431703	0.00225488
FOXM1	3927.33	-1.20046	0.213687	-5.61782	1.9338e-08	2.39484e-07
FGF6	100.734	-1.91017	0.430679	-4.43524	9.19702e-06	7.05656e-05
RAD51AP1	4128.15	-2.19175	0.179678	-12.1983	3.17507e-34	3.00005e-32
CUX2	179.123	2.06205	0.305729	6.7447	1.53345e-11	2.85634e-10
AKAP3	108.642	-1.05367	0.236801	-4.44961	8.60256e-06	6.64526e-05
MANSC1	32.0239	1.09235	0.390243	2.79916	0.00512362	0.0192953
OAS3	3062.41	-1.14267	0.264703	-4.31682	1.58292e-05	0.000115051
OAS2	1451.71	-1.59007	0.203707	-7.80568	5.91803e-15	1.57355e-13
RASAL1	754.892	-2.72723	0.473686	-5.75747	8.5384e-09	1.11612e-07
RERGL	1126.22	3.16676	0.334579	9.46492	2.9378e-21	1.31945e-19
VDR	61.5773	-1.23066	0.321766	-3.8247	0.000130933	0.000780143
RFC5	2613.12	-1.49984	0.237902	-6.30447	2.89178e-10	4.62871e-09
ADGRD1	830.077	3.58029	0.436107	8.20965	2.21837e-16	6.75331e-15
TBC1D30	15.5813	4.26015	0.783584	5.43674	5.42636e-08	6.27074e-07
NUP107	4358.86	-0.594012	0.183805	-3.23175	0.00123033	0.00567319
TIMELESS	7298.75	-1.24365	0.0835065	-14.8929	3.66499e-50	6.45677e-48
KRR1	2664.88	-0.619927	0.173903	-3.5648	0.00036414	0.0019421
NOP2	46.6584	1.50286	0.490353	3.06486	0.00217774	0.00933555
CDCA3	2063.16	-2.08782	0.23878	-8.74369	2.25608e-18	8.15985e-17
GNPTAB	4950.45	1.6706	0.235922	7.08114	1.42972e-12	2.97572e-11
PTPN6	4406.1	1.24265	0.184028	6.75254	1.4528e-11	2.7191e-10
CMAS	1795.89	-0.714964	0.107069	-6.67763	2.42838e-11	4.40904e-10
C2CD5	6979.93	0.972725	0.295826	3.28817	0.00100841	0.00476908
DDX12B	2364.37	-1.14291	0.162703	-7.02451	2.14818e-12	4.42053e-11
KLRB1	12.9637	-2.91002	0.76123	-3.82279	0.000131952	0.00078604
FRK	145.719	-2.59702	0.568928	-4.56476	5.00058e-06	4.05075e-05
DSE	642.966	0.75313	0.277102	2.71788	0.0065702	0.0238223
RWDD1	1975.74	-0.830679	0.232756	-3.56888	0.000358513	0.00191583
RSPH4A	36.7446	2.65209	0.572801	4.63004	3.65595e-06	3.04741e-05
NEDD9	384.735	1.27456	0.278774	4.57202	4.83047e-06	3.9281e-05
ASF1A	2872.17	0.919711	0.136977	6.71433	1.88934e-11	3.4954e-10
MAN1A1	4167.06	1.60199	0.221616	7.22866	4.87791e-13	1.06306e-11
GABRR2	793.643	1.56477	0.164367	9.51998	1.73219e-21	7.89663e-20
NCOA7	1031.64	-0.961895	0.165634	-5.80735	6.34678e-09	8.49983e-08
RIPOR2	1273.07	-1.17332	0.262719	-4.46607	7.96702e-06	6.21055e-05
FBXO5	2600.62	-1.32566	0.279386	-4.74491	2.08602e-06	1.83455e-05
MCM3	16354.3	-1.85119	0.239336	-7.73472	1.03633e-14	2.69258e-13
PHACTR1	950.143	-0.602242	0.137276	-4.38708	1.1488e-05	8.62535e-05
MDGA1	1078.7	-1.74421	0.339713	-5.13437	2.83085e-07	2.90937e-06
RBM24	212.83	4.53902	0.97683	4.64669	3.37305e-06	2.84015e-05
CAP2	1294.42	1.90954	0.40923	4.66617	3.06869e-06	2.604e-05
FBXL4	1918.92	-1.01827	0.148257	-6.86828	6.49823e-12	1.26569e-10
POPDC1	721.643	0.666217	0.24774	2.68918	0.00716285	0.0255681
GPLD1	251.843	0.952497	0.163475	5.82655	5.65866e-09	7.63821e-08
ALDH5A1	5913.93	0.69287	0.283747	2.44186	0.014612	0.0462031
CRYBG1	3871.6	-0.905802	0.09125	-9.9266	3.18953e-23	1.60695e-21
VNN2	359.045	2.84698	0.476803	5.97098	2.35828e-09	3.34533e-08
SMAP1	557.757	1.32286	0.203176	6.5109	7.47022e-11	1.29107e-09
RPS12	24721	-0.757214	0.289667	-2.61408	0.00894674	0.0306689
B3GAT2	115.474	2.29426	0.594904	3.85653	0.00011501	0.000694462
GMNN	1972.41	-1.36351	0.238744	-5.71117	1.12204e-08	1.44322e-07
EYA4	584.855	6.21891	0.286201	21.7292	1.0867e-104	9.27328e-102
SNX3	5803.06	1.27993	0.180671	7.08431	1.39739e-12	2.91286e-11
HBS1L	15719.5	-1.49454	0.11402	-13.1076	2.97733e-39	3.56588e-37
PERP	1019.21	-1.03609	0.136174	-7.60857	2.77136e-14	6.83628e-13
ARFGEF3	309.297	-0.749534	0.211497	-3.54394	0.000394193	0.00208125
SLC16A10	424.258	-2.08133	0.222352	-9.36049	7.93688e-21	3.47885e-19
ADGRG6	5.45436	2.63758	0.977147	2.69927	0.00694921	0.0249293
SLC39A7	4290.46	0.740971	0.135648	5.46245	4.69604e-08	5.47077e-07
PDE10A	53.0369	-1.85004	0.399309	-4.63309	3.60244e-06	3.00647e-05
MDFI	6919.94	-1.37708	0.12195	-11.2922	1.43457e-29	1.06741e-27
TFEB	1360.38	0.863821	0.251656	3.43255	0.000597941	0.00300589
CCND3	43189.2	-2.47683	0.154502	-16.0311	7.74997e-58	1.72056e-55
FAM120B	2132.79	0.701226	0.159427	4.39841	1.09049e-05	8.23509e-05
BICRAL	1336.14	-0.891259	0.131437	-6.78091	1.19424e-11	2.2584e-10
DNPH1	730.747	-0.823155	0.240117	-3.42814	0.000607739	0.00304953
SENP6	5417.07	0.914138	0.105446	8.66929	4.34814e-18	1.53801e-16
IMPG1	37.8112	1.21047	0.404391	2.99332	0.00275962	0.0113901
TTK	1941.24	-1.88066	0.098277	-19.1363	1.25925e-81	5.54619e-79
SLC29A1	1744.11	-0.813607	0.322491	-2.52288	0.0116398	0.0382028
BTN2A1	2712.59	0.788943	0.171547	4.59898	4.24557e-06	3.50253e-05
CLIC5	6389.14	0.880886	0.193687	4.54799	5.41599e-06	4.35368e-05
LY86	65.8389	-0.925748	0.227839	-4.06316	4.84126e-05	0.000316344
HARS2	1797.63	1.00156	0.19026	5.26418	1.40816e-07	1.51987e-06
CEP72	1099.45	-1.1913	0.217471	-5.47796	4.30261e-08	5.03822e-07
HMGCS1	3058.79	1.1021	0.292594	3.76666	0.000165446	0.00096329
KIF20A	2588.21	-2.18848	0.165446	-13.2278	6.06603e-40	7.63342e-38
NNT	6353.92	-0.7736	0.129966	-5.95235	2.64321e-09	3.73206e-08
MRPS27	3888.35	-0.787857	0.225673	-3.49115	0.000480953	0.00248221
PFDN1	1289.74	0.748362	0.283855	2.63642	0.00837851	0.0290456
HBEGF	4343.6	5.8963	0.219819	26.8235	1.71993e-158	5.87078e-155
SLC4A9	25.5304	3.51063	0.626652	5.60221	2.1164e-08	2.6021e-07
APBB3	2322.84	1.3814	0.240648	5.74033	9.4492e-09	1.22988e-07
HMGCR	3807.66	0.858818	0.0781758	10.9857	4.47635e-28	3.06355e-26
PCDHB7	3.3153	5.13143	1.46065	3.51311	0.000442898	0.00230762
CLK4	2182.38	0.762268	0.170753	4.46415	8.03873e-06	6.25751e-05
PCDHB15	10.8988	2.71186	0.837885	3.23656	0.00120981	0.00559654
ARSB	412.571	1.77392	0.334487	5.30341	1.13661e-07	1.24749e-06
BTNL8	3.3418	3.57253	1.35578	2.63505	0.00841253	0.0291413
CCNG1	5597.02	-0.709292	0.175577	-4.03977	5.35047e-05	0.000346385
LMNB1	5396.12	-1.09982	0.368147	-2.98744	0.00281324	0.0115764
ARRDC3	927.483	2.35231	0.160331	14.6716	9.80429e-49	1.60315e-46
GOLPH3	2926.55	0.616804	0.10599	5.81946	5.90379e-09	7.94554e-08
SUB1	5973.47	0.864682	0.173586	4.98129	6.31608e-07	6.07514e-06
SLC27A6	389.965	0.808412	0.181645	4.45049	8.56731e-06	6.62178e-05
RAD1	2369.55	-1.05286	0.245207	-4.29377	1.75666e-05	0.000126635
PRLR	7.56512	4.82567	1.20738	3.9968	6.42055e-05	0.000409511
SKP1	247.436	1.13069	0.230293	4.9098	9.11689e-07	8.51127e-06
NUP155	3373.1	-0.72046	0.243168	-2.9628	0.0030485	0.0124154
NR3C1	2589.83	-0.68479	0.146157	-4.68531	2.79537e-06	2.38915e-05
C5orf15	2209.99	0.74098	0.241548	3.06762	0.00215768	0.00925973
TRAPPC13	1388.45	0.653177	0.171567	3.80712	0.000140593	0.000833019
C9	2.45451	4.69923	1.88575	2.49197	0.0127036	0.0410771
TXNDC15	1491.19	0.713178	0.200876	3.55033	0.000384743	0.00203924
TTC33	2178.5	-0.903826	0.0831421	-10.8709	1.58691e-27	1.06028e-25
RARS1	2531.96	0.752065	0.21682	3.46861	0.000523165	0.00267329
HMGXB3	3510.58	0.647579	0.193551	3.34577	0.000820531	0.00397697
ERGIC1	22729.8	-1.05788	0.137181	-7.71155	1.24303e-14	3.1992e-13
PDGFRB	3277.49	1.03447	0.245977	4.20555	2.60447e-05	0.000179903
ATP6V0E1	1386.71	0.805011	0.261042	3.08384	0.0020435	0.008849
CPEB4	622.151	0.988932	0.200405	4.93467	8.02869e-07	7.58614e-06
HRH2	1129.65	1.25742	0.399892	3.14439	0.00166434	0.00740199
DBN1	17258.4	1.265	0.14878	8.5025	1.85554e-17	6.17164e-16
CNTN3	69.3897	8.06802	1.13902	7.08328	1.40786e-12	2.93245e-11
SMC4	12405.3	-1.3931	0.0889159	-15.6676	2.5202e-55	5.21358e-53
ACTR8	770.847	0.754182	0.220262	3.42402	0.000617011	0.00308698
BCL6	6010.39	1.28392	0.331535	3.87265	0.000107656	0.000655175
ARL6	376.077	1.6396	0.16766	9.77934	1.38113e-22	6.62821e-21
CD86	57.0946	4.56146	0.85842	5.31379	1.07369e-07	1.18271e-06
AMOTL2	33.0979	-1.52945	0.381486	-4.00919	6.09286e-05	0.000390558
NIT2	3575.28	2.25017	0.33564	6.70412	2.0263e-11	3.72106e-10
TFDP2	11447.7	-1.10535	0.143159	-7.72117	1.15271e-14	2.97797e-13
BCHE	2561.01	1.65706	0.348257	4.75814	1.95382e-06	1.72944e-05
COL7A1	1159.88	1.56566	0.156272	10.0189	1.25928e-23	6.57497e-22
PRKAR2A	936.515	0.611992	0.186713	3.27771	0.00104653	0.00492462
ECT2	2625.12	-1.87296	0.100423	-18.6508	1.24501e-77	4.96152e-75
GNAT1	1.67245	-4.26408	1.66687	-2.55814	0.0105234	0.035057
TUSC2	473.727	0.774795	0.314297	2.46517	0.0136949	0.0438054
CYB561D2	113.09	0.690473	0.27315	2.52782	0.0114773	0.037765
HHLA2	19.4097	1.39548	0.452864	3.08146	0.00205988	0.00890757
GBE1	4076.64	2.33963	0.119294	19.6124	1.2125e-85	6.01995e-83
MORC1	20.3222	3.09046	0.936338	3.30059	0.000964829	0.00459212
C3orf52	647.995	3.53713	0.517087	6.84049	7.89234e-12	1.52524e-10
FRMD4B	53.5512	-1.4441	0.278141	-5.19197	2.0808e-07	2.18709e-06
PLXNA1	10817.7	-1.17172	0.355012	-3.30051	0.000965107	0.00459212
ATP6V1A	2097.69	0.834975	0.201641	4.1409	3.45946e-05	0.000233426
KLHL18	643.654	1.28627	0.347292	3.70373	0.000212456	0.00120289
SCAP	2366.44	0.620053	0.148621	4.17204	3.01891e-05	0.00020599
EFCC1	58.3496	-2.99194	0.340756	-8.7803	1.63043e-18	5.94422e-17
CFAP92	102.845	-0.601506	0.232577	-2.58626	0.00970224	0.0327829
NEK11	17.9847	2.07376	0.628913	3.29738	0.000975929	0.00463634
CISH	104.231	1.18664	0.274398	4.3245	1.52878e-05	0.000111294
WDR48	975.128	-0.633313	0.113045	-5.60229	2.11541e-08	2.60205e-07
RRP9	420.528	1.4028	0.560022	2.5049	0.0122486	0.0398514
ABHD14B	1189.35	-1.34969	0.250269	-5.39295	6.931e-08	7.87291e-07
KLHL24	4843.54	-1.10758	0.397052	-2.78951	0.00527872	0.0198057
PLCH1	181.404	-1.88266	0.374036	-5.03337	4.81942e-07	4.74077e-06
ZBTB47	469.752	0.647503	0.143448	4.51385	6.36601e-06	5.06066e-05
CLCN2	432.319	0.727449	0.136487	5.32979	9.83258e-08	1.08748e-06
EIF4G1	15501	0.830965	0.325331	2.55421	0.0106428	0.0353987
EEF1B2	13040.8	-0.96992	0.283089	-3.4262	0.000612093	0.0030663
ADAM23	19.0177	7.65064	1.18202	6.47251	9.63874e-11	1.644e-09
RTKN	1163.83	1.68729	0.121483	13.8892	7.36723e-44	1.0478e-41
TP53I3	626.934	2.82998	0.246889	11.4625	2.03439e-30	1.58723e-28
STAM2	1718.39	1.02561	0.141321	7.25732	3.94823e-13	8.67344e-12
GPD2	529.153	-1.21794	0.238709	-5.10222	3.3569e-07	3.40516e-06
CENPA	1099.43	-1.96805	0.18989	-10.3642	3.60835e-25	2.10992e-23
ACVR1	428.953	0.887995	0.121213	7.32589	2.37312e-13	5.34237e-12
TANC1	714.654	0.749588	0.119787	6.25766	3.90799e-10	6.14721e-09
SLC30A3	927.541	-1.18946	0.294853	-4.03409	5.48135e-05	0.000354019
EIF2B4	1626.88	0.787399	0.166714	4.72305	2.3233e-06	2.02368e-05
ITGA4	5741.15	-1.26478	0.161762	-7.81881	5.33259e-15	1.42483e-13
PPM1G	9200.02	-1.003	0.261608	-3.83398	0.000126088	0.000753742
RPS15	15480.3	-0.710183	0.228448	-3.10872	0.00187898	0.00823452
GRB14	2.82453	4.90146	1.4917	3.28582	0.00101685	0.00480233
RTN4	9436.4	0.634928	0.163003	3.89519	9.81237e-05	0.000602804
HTRA2	1221.96	-0.603911	0.117483	-5.14043	2.74109e-07	2.82244e-06
GALNT3	757.552	1.38063	0.393549	3.50815	0.000451241	0.00234661
EVA1A	52.1075	-4.56202	0.483826	-9.42905	4.13812e-21	1.84039e-19
FANCL	2265.18	-0.67709	0.177806	-3.80803	0.000140078	0.00083046
FN1	63.3787	1.46648	0.39605	3.70276	0.000213268	0.00120724
GLS	5567.02	1.05759	0.128608	8.22334	1.97914e-16	6.04522e-15
DNAH6	78.9199	-1.37533	0.467158	-2.94403	0.00323967	0.013075
PECR	637.225	-0.812165	0.172327	-4.71292	2.44188e-06	2.11885e-05
IGFBP2	4654.51	-0.800974	0.173993	-4.60349	4.15475e-06	3.42968e-05
EFHD1	18.8528	1.3404	0.521314	2.5712	0.0101348	0.0340157
MOB4	691.694	0.58854	0.188407	3.12377	0.00178547	0.00787401
KDM3A	3993.12	0.899913	0.0843549	10.6682	1.43401e-26	9.04352e-25
IL1RL1	4.7014	5.63691	1.29936	4.33823	1.43638e-05	0.000105467
IL18R1	30.4755	1.29241	0.386759	3.34164	0.000832843	0.00402806
SLC9A2	4.06706	4.65472	1.3334	3.49087	0.000481447	0.00248382
UXS1	3010.83	0.96354	0.345301	2.79044	0.0052637	0.0197575
PASK	4147.97	-1.07444	0.0856751	-12.5409	4.45927e-36	4.5778e-34
ID2	1158.89	0.761237	0.188614	4.03595	5.43822e-05	0.0003514
ODC1	4065.93	1.25616	0.518899	2.42081	0.0154859	0.0484807
STRN	2080.2	-0.723153	0.125446	-5.76465	8.18266e-09	1.07528e-07
PRKD3	3090.61	-0.643459	0.126551	-5.08459	3.68429e-07	3.70014e-06
LCT	13.0591	-1.69411	0.558726	-3.03209	0.00242865	0.0102297
DARS1	6036.97	-1.06184	0.210162	-5.05246	4.36147e-07	4.32771e-06
SDC1	370.16	-2.39197	0.170427	-14.0352	9.49591e-45	1.37198e-42
SLC1A4	1739.53	-0.761684	0.235621	-3.23266	0.00122643	0.00565808
KYNU	86.7443	5.02865	0.543945	9.24478	2.35718e-20	9.96403e-19
COX7A2L	2054.82	-0.683208	0.244909	-2.78964	0.00527668	0.0198008
PNO1	507.242	1.76191	0.520288	3.38641	0.000708146	0.00348672
PLEK	8695.44	3.29193	0.260117	12.6556	1.04202e-36	1.11586e-34
TRAK2	2468.8	1.63469	0.137844	11.859	1.93274e-32	1.68081e-30
TIA1	13287.2	0.658433	0.190796	3.45097	0.000558574	0.00283197
PCYOX1	2431.64	0.883129	0.0977695	9.03277	1.67378e-19	6.54814e-18
GRIN3B	150.386	0.763956	0.283378	2.69588	0.0070202	0.0251575
MSH6	16733.4	-1.18993	0.167025	-7.12424	1.04653e-12	2.21704e-11
EPHA4	531.888	4.52632	0.375632	12.0499	1.94265e-33	1.76826e-31
MARK1	6.17051	6.0299	1.37909	4.37237	1.22902e-05	9.17718e-05
RALGPS2	2184.67	-1.07609	0.36717	-2.93076	0.00338129	0.0135505
TCEANC2	1692.79	-1.10042	0.120554	-9.12796	6.98004e-20	2.82376e-18
QSOX1	1636.34	0.81209	0.185343	4.38155	1.17841e-05	8.83545e-05
ERRFI1	676.367	0.736225	0.170715	4.3126	1.61347e-05	0.000117022
AMPD2	4256.01	1.27265	0.204255	6.2307	4.6435e-10	7.23745e-09
WDR77	860.039	1.21944	0.475752	2.56319	0.0103715	0.0346397
TRIM62	833.159	0.712397	0.142639	4.99439	5.9021e-07	5.70307e-06
SFPQ	27204.4	1.16931	0.183023	6.38888	1.67103e-10	2.76215e-09
RHOU	398.277	-1.09721	0.174568	-6.28528	3.27255e-10	5.20161e-09
MEF2D	13433.3	1.3815	0.086173	16.0316	7.68168e-58	1.72056e-55
DOCK7	1468.38	0.830277	0.0988481	8.39952	4.48315e-17	1.45221e-15
FBXO6	96.9718	0.768749	0.291489	2.63732	0.00835645	0.0289949
C1orf21	1832.08	-0.871601	0.2768	-3.14885	0.00163914	0.00731013
MAD2L2	3421.86	-0.698389	0.096337	-7.24943	4.18515e-13	9.17206e-12
NCF2	533.273	-2.05813	0.298988	-6.88366	5.83347e-12	1.146e-10
PLA2G4A	61.3444	9.34178	1.27425	7.33118	2.28128e-13	5.15685e-12
GADD45A	2139.22	1.37895	0.27418	5.02937	4.92094e-07	4.83193e-06
RGS2	902.37	2.28183	0.24811	9.19683	3.68656e-20	1.52992e-18
AGMAT	8.191	2.24622	0.6802	3.30229	0.000958973	0.0045685
PLEKHM2	3682.11	0.671832	0.176355	3.80954	0.000139223	0.000825755
ZBTB17	3068.02	0.907003	0.239404	3.78859	0.000151503	0.00088898
CD58	1320.96	-1.51795	0.112656	-13.4742	2.21759e-41	2.93959e-39
TTF2	3347.9	-1.17497	0.257197	-4.56836	4.91566e-06	3.99024e-05
MAP7D1	7016.79	0.888778	0.186008	4.77818	1.76889e-06	1.58163e-05
NT5C1A	474.183	0.710198	0.256313	2.77082	0.00559145	0.0208104
BMP8B	1131.99	0.868565	0.236052	3.67955	0.000233648	0.00131091
MYCL	127.501	1.74963	0.336958	5.19242	2.07581e-07	2.18268e-06
KMO	179.768	2.4676	0.247661	9.96361	2.19932e-23	1.11217e-21
KCNQ4	111.122	1.53234	0.373819	4.09916	4.14654e-05	0.000275431
RIMS3	2574.7	0.63895	0.207561	3.07837	0.00208138	0.00898741
SLAMF1	146.426	9.15176	1.05607	8.66587	4.48073e-18	1.58082e-16
ADGRL2	34.6199	4.5533	0.560488	8.12382	4.51725e-16	1.3321e-14
MFAP2	70.9072	-1.85245	0.376147	-4.9248	8.44459e-07	7.93745e-06
KDM5B	9506.24	0.84092	0.133275	6.30964	2.79678e-10	4.48557e-09
ZNHIT6	1417.7	0.987942	0.314063	3.14568	0.001657	0.00737535
PINK1-AS	203.964	1.31111	0.366741	3.57503	0.000350194	0.00187726
CDK18	1355.43	-1.00507	0.401266	-2.50476	0.0122536	0.0398628
ECE1	960.45	-0.917338	0.196571	-4.66669	3.06085e-06	2.59816e-05
ID3	2886.94	-1.09508	0.26428	-4.14365	3.41818e-05	0.000230983
PRPF3	4200.71	0.805379	0.291312	2.76466	0.00569827	0.0211532
CDC20	3150.52	-1.40004	0.24105	-5.8081	6.31854e-09	8.46616e-08
IPO13	2213.03	1.27686	0.213748	5.97367	2.31972e-09	3.29234e-08
ATP6V0B	2786.07	0.601911	0.2295	2.6227	0.00872352	0.0300508
PTCH2	189.241	1.41074	0.184485	7.64692	2.05853e-14	5.17608e-13
FAAH	234.244	0.831231	0.262178	3.17049	0.00152185	0.00684743
F3	108.278	-1.89996	0.440687	-4.31137	1.62246e-05	0.000117612
TNFSF4	2652.38	2.98049	0.228666	13.0342	7.8139e-39	9.1577e-37
DARS2	1491.69	-0.813683	0.131285	-6.19783	5.72477e-10	8.81208e-09
RCAN3	621.926	-0.750591	0.17732	-4.23296	2.30633e-05	0.000161941
SYF2	1842.54	-0.706171	0.168161	-4.19938	2.67642e-05	0.000184419
STMN1	36204.2	-0.872371	0.185662	-4.6987	2.61818e-06	2.25393e-05
MAN1C1	429.966	-1.42815	0.144232	-9.90175	4.09059e-23	2.04582e-21
NEK2	1575.46	-2.03901	0.149869	-13.6053	3.72492e-42	5.08582e-40
RPS6KA1	5309.18	0.62929	0.165008	3.8137	0.000136903	0.000813229
CENPF	13217.6	-2.21843	0.166444	-13.3284	1.58291e-40	2.06815e-38
TXNDC12	427.134	-1.29563	0.213116	-6.07948	1.20576e-09	1.77306e-08
MESD	2361.97	0.701459	0.213192	3.29027	0.0010009	0.00473847
CHRNB4	28.2849	4.23256	0.994342	4.25665	2.07514e-05	0.000147069
MUC5B	9.29349	1.79797	0.714744	2.51555	0.0118848	0.0388807
CTSD	1012.63	1.07454	0.154254	6.96607	3.25907e-12	6.56308e-11
KPTN	623.075	1.0084	0.258688	3.89812	9.69414e-05	0.000596346
RPS25	19667	-0.92447	0.215675	-4.2864	1.81594e-05	0.000130529
KIF14	5235.75	-2.27425	0.218719	-10.3981	2.53007e-25	1.49867e-23
TNNT2	4.71643	5.6409	1.26795	4.44883	8.63388e-06	6.66498e-05
CAMSAP2	2091.48	0.640367	0.118274	5.41427	6.1539e-08	7.0518e-07
MREG	408.573	0.607341	0.175032	3.46988	0.000520691	0.00266264
FASTKD2	1526.55	1.0458	0.375676	2.78377	0.00537304	0.020109
B4GALT6	2604.02	-1.1908	0.0928247	-12.8285	1.13507e-37	1.2703e-35
CA14	74.782	-1.01859	0.345146	-2.95119	0.00316552	0.0128175
DNAI7	25.9701	1.13623	0.462196	2.45833	0.0139583	0.0445073
IRAG2	23479	2.27331	0.371266	6.12312	9.17614e-10	1.36925e-08
CASP8AP2	3957.07	-0.841667	0.146094	-5.76113	8.35502e-09	1.09425e-07
UBE3D	456.676	0.835693	0.149255	5.59909	2.15484e-08	2.64341e-07
ANKRD13C	2005.72	0.944567	0.107669	8.77285	1.74204e-18	6.33422e-17
PHF3	5090.36	-0.82337	0.100849	-8.16436	3.23142e-16	9.70743e-15
PLAGL1	1655.3	1.3823	0.173792	7.95374	1.80966e-15	5.06835e-14
TNFAIP3	13564.8	-1.40529	0.184518	-7.61599	2.61683e-14	6.49615e-13
MYB	23001.6	-1.08988	0.244788	-4.45236	8.49333e-06	6.57018e-05
ALDH8A1	102.544	0.910442	0.297167	3.06373	0.00218593	0.00936331
SGK1	1288.89	3.76482	0.293683	12.8193	1.27778e-37	1.42417e-35
RNF146	2208.37	0.96122	0.218276	4.40369	1.06427e-05	8.05044e-05
CCN2	698.504	4.02313	0.846118	4.75481	1.98637e-06	1.75588e-05
PMFBP1	179.642	-0.650113	0.206611	-3.14656	0.00165203	0.00735801
FBXL5	3348.78	-0.728552	0.118265	-6.16034	7.25869e-10	1.10057e-08
DCLRE1B	1465.53	-1.02114	0.285777	-3.57322	0.000352624	0.0018888
CASQ2	4.6785	5.63051	1.35541	4.15411	3.26558e-05	0.000221659
OLFM3	50.5265	7.6114	1.0436	7.29339	3.02241e-13	6.73739e-12
ABCG2	43.0948	-1.39428	0.369775	-3.77062	0.000162841	0.000949539
CCNI	12577.5	-0.748422	0.149474	-5.00703	5.52771e-07	5.37554e-06
CYP20A1	770.201	0.897546	0.203177	4.41756	9.98216e-06	7.59919e-05
CPSF3	3765.1	-0.736949	0.226269	-3.25696	0.00112612	0.00525656
CCDC92	1287.4	0.70601	0.121498	5.81087	6.21483e-09	8.34358e-08
C1orf198	961.67	0.838195	0.209314	4.00449	6.21525e-05	0.000397843
RAD23B	7130.75	0.67529	0.178909	3.77449	0.000160335	0.000936526
CTNNAL1	3039.52	-1.37979	0.119951	-11.503	1.27398e-30	1.00836e-28
ABITRAM	710.813	0.829514	0.259239	3.1998	0.00137522	0.00625678
DYNC2I2	4840.33	-0.910496	0.0909072	-10.0157	1.30081e-23	6.77886e-22
GLE1	2834.51	-0.68428	0.186215	-3.67468	0.000238146	0.00133123
RAB14	5141.8	0.720734	0.144994	4.97079	6.66802e-07	6.38442e-06
CNTRL	7748.86	-0.988593	0.198653	-4.97647	6.47533e-07	6.21081e-06
BSPRY	103.963	-1.76262	0.302385	-5.82906	5.57404e-09	7.53143e-08
HSDL2	4301.38	1.56981	0.292478	5.36727	7.9937e-08	8.99421e-07
NR4A3	887.393	4.46223	0.271403	16.4413	9.67786e-61	2.2396e-58
GALNT12	272.265	-1.39286	0.238873	-5.83098	5.51043e-09	7.45286e-08
ALG2	1187.63	0.79717	0.188629	4.22612	2.37751e-05	0.000166255
DCAF4	274.166	1.04508	0.349249	2.99235	0.00276835	0.0114175
ACYP1	611.152	-1.43045	0.13601	-10.5173	7.19031e-26	4.39252e-24
IFT43	397.208	0.845379	0.305984	2.76282	0.0057304	0.0212638
NPC2	1260.32	-0.614006	0.182161	-3.37067	0.00074985	0.00367154
DNAL1	717.868	0.60482	0.226213	2.67368	0.00750244	0.0265321
AREL1	3158.42	0.681602	0.187067	3.64361	0.000268836	0.00148545
TTLL5	1374.83	-0.674788	0.146722	-4.5991	4.24312e-06	3.50157e-05
PPP4R4	136.482	-1.2725	0.325597	-3.90821	9.29807e-05	0.000575322
ALDH6A1	1388.95	-0.875003	0.201701	-4.33812	1.43708e-05	0.00010549
GPR75	116.061	1.84055	0.241936	7.6076	2.79226e-14	6.88161e-13
KLHL29	539.745	-0.694722	0.138872	-5.00259	5.65647e-07	5.48903e-06
DNMT3A	6320.47	0.691565	0.104094	6.64369	3.05928e-11	5.50777e-10
TMEM214	3525.38	0.683324	0.206484	3.30933	0.000935187	0.00446532
ATL2	2981.41	-0.632012	0.110982	-5.69473	1.23564e-08	1.57524e-07
FAM98A	1868.23	1.56295	0.21154	7.38843	1.48573e-13	3.42834e-12
SLF2	2857.57	-0.805722	0.214107	-3.76317	0.00016777	0.000973769
IDE	2163.2	0.594674	0.210992	2.81846	0.00482547	0.0183573
NKX2-3	439.263	-1.24431	0.127818	-9.73505	2.13704e-22	1.01313e-20
GPAM	1259.2	0.871085	0.333314	2.6134	0.0089645	0.0307144
MXI1	659.585	-1.17256	0.231848	-5.05746	4.2487e-07	4.22503e-06
HELLS	5004.17	-1.55312	0.150184	-10.3414	4.57611e-25	2.63074e-23
TCTN3	1566.03	0.699174	0.27151	2.57513	0.0100201	0.0336969
AVPI1	64.6968	-1.37074	0.528552	-2.59339	0.00950342	0.0322013
WDR11	3387.72	0.619557	0.107501	5.76327	8.25013e-09	1.08259e-07
ARMH3	1554.38	0.595341	0.140692	4.23153	2.32106e-05	0.000162683
GOT1	2680.44	-0.777382	0.122544	-6.34368	2.24341e-10	3.64865e-09
GNA13	7951.93	-0.962409	0.175245	-5.49179	3.97889e-08	4.68729e-07
RCL1	683.819	1.01967	0.296098	3.44369	0.00057384	0.00289968
MOB3B	416.24	-2.01507	0.139676	-14.4267	3.51537e-47	5.3628e-45
GRIA2	83.9536	6.72488	1.27663	5.26768	1.38159e-07	1.49591e-06
NUP43	4179.88	-0.67273	0.225126	-2.98824	0.0028059	0.0115601
MTHFD1L	1487.79	-1.37081	0.273795	-5.00671	5.53674e-07	5.3824e-06
LRP11	86.702	-1.12283	0.366258	-3.06569	0.00217171	0.00931557
CCDC170	8.54404	-1.6018	0.61682	-2.59686	0.00940797	0.0319333
TASL	307.882	0.889502	0.254844	3.49038	0.000482328	0.00248649
WDR55	1743.04	0.662858	0.150822	4.39496	1.10793e-05	8.35289e-05
ARAP3	40.6564	1.44269	0.545962	2.64247	0.0082303	0.0286518
PCDHB10	37.881	2.20498	0.415878	5.30198	1.14552e-07	1.25626e-06
PCDHB14	168.943	2.04617	0.219845	9.30736	1.31046e-20	5.6354e-19
PCDHB12	20.5102	2.7313	0.593985	4.59826	4.26043e-06	3.51267e-05
CENPL	1048.96	-0.697405	0.163486	-4.26585	1.9914e-05	0.00014187
TNFSF18	19.5715	3.20894	0.756578	4.24138	2.22146e-05	0.000156505
TTLL2	35.0119	-1.4415	0.407746	-3.53529	0.000407329	0.00214191
SNX19	3532.59	0.95143	0.161017	5.90887	3.44455e-09	4.78435e-08
TEX11	8.73412	-3.05692	1.04251	-2.93229	0.00336477	0.0134956
ARR3	51.5631	0.826263	0.336752	2.45363	0.0141423	0.0450046
NUDCD1	1416.51	-0.806757	0.250449	-3.22125	0.00127635	0.00586556
MASTL	2270.44	-1.37736	0.109927	-12.5297	5.13332e-36	5.25003e-34
KIAA1217	97.1401	2.13351	0.444036	4.80482	1.54894e-06	1.39548e-05
EPC1	1026.63	0.82546	0.171789	4.80508	1.54691e-06	1.3941e-05
IQSEC3	18.2329	7.59229	1.17383	6.46795	9.93381e-11	1.69222e-09
CCDC77	1390.82	-0.99662	0.158201	-6.29972	2.98191e-10	4.77019e-09
SOHLH2	181.179	2.83277	0.371325	7.62881	2.36932e-14	5.92482e-13
DNAJC15	1219.06	1.71622	0.215106	7.97849	1.48137e-15	4.19189e-14
UFM1	4434.14	0.845054	0.117656	7.18239	6.85048e-13	1.47296e-11
SMAD9	323.303	-1.25087	0.212397	-5.8893	3.87842e-09	5.36291e-08
EXOSC8	3066.88	-0.76107	0.122711	-6.20212	5.57072e-10	8.60002e-09
SIL1	504.087	0.839464	0.179293	4.68208	2.83985e-06	2.42489e-05
PAIP2	2383.67	-0.615022	0.112042	-5.48923	4.03697e-08	4.75162e-07
EGR1	275.872	5.1282	0.940371	5.45338	4.9422e-08	5.74039e-07
UTP20	1489.17	1.79887	0.563219	3.1939	0.00140364	0.00637013
TMPO	14752.8	-0.588901	0.240076	-2.45297	0.0141681	0.0450734
ARL1	2081.96	0.589176	0.0832201	7.07974	1.44427e-12	3.00371e-11
TNFRSF10B	6487.73	0.95788	0.181723	5.27109	1.35615e-07	1.47071e-06
PTK2B	14489.1	0.625505	0.235077	2.66085	0.00779431	0.0273642
EPHX2	6.95621	-3.12936	0.858181	-3.6465	0.000265836	0.00147126
SCPEP1	2976.96	1.14602	0.219046	5.23186	1.6781e-07	1.79069e-06
SLC35B1	1614.45	1.12958	0.201601	5.60302	2.10644e-08	2.59452e-07
TEX14	199.323	-1.94477	0.224389	-8.66699	4.43704e-18	1.56743e-16
NCAPH	3960.38	-1.52715	0.247496	-6.17041	6.81119e-10	1.03791e-08
MND1	31.3696	-1.40641	0.364565	-3.85777	0.000114425	0.000691746
TSHZ3	615.382	-0.807047	0.161014	-5.01228	5.37891e-07	5.24967e-06
PYROXD1	295.037	0.909926	0.155243	5.86131	4.59221e-09	6.28569e-08
PDZRN3	24.2136	3.24611	0.600519	5.40551	6.46247e-08	7.36522e-07
B4GALT4	980.603	1.23325	0.367418	3.35654	0.000789234	0.0038437
KIF18A	1335.86	-1.96288	0.0962352	-20.3966	1.79077e-92	1.13722e-89
GJB6	30.8312	8.34967	1.22129	6.83674	8.1016e-12	1.56236e-10
GJA3	94.429	2.04204	0.483357	4.2247	2.39259e-05	0.000167224
TBC1D15	2573.79	-0.669868	0.139922	-4.78744	1.68923e-06	1.51437e-05
HCRTR1	51.3202	-2.13204	0.642159	-3.32012	0.00089979	0.0043129
TNFSF10	166.201	-1.75203	0.23	-7.61753	2.58575e-14	6.42486e-13
PIK3CA	2339.5	-0.644816	0.105352	-6.12061	9.32206e-10	1.39026e-08
PDS5A	11879.9	-0.592663	0.144786	-4.09337	4.25153e-05	0.000281514
CPXM2	1231.6	8.09883	0.447283	18.1067	2.82129e-73	9.87706e-71
CSMD2	181.52	5.635	0.575634	9.78921	1.25276e-22	6.04399e-21
GPSM2	933.817	-1.51981	0.129668	-11.7209	9.96611e-32	8.42553e-30
CXCR4	5330.35	-2.80511	0.273533	-10.2551	1.12244e-24	6.25522e-23
ZRANB3	718.151	-0.926001	0.115439	-8.02157	1.04401e-15	2.98208e-14
FLT3	4698.14	-1.16866	0.127102	-9.19466	3.76165e-20	1.55635e-18
RPL21	20098.7	-0.803895	0.272083	-2.95459	0.00313081	0.0126995
MTIF3	986.772	-0.747674	0.134697	-5.55078	2.84392e-08	3.42562e-07
RASL11A	25.2957	1.43382	0.398713	3.59612	0.000323003	0.00174716
XPNPEP2	147.589	-1.47216	0.313132	-4.70139	2.58396e-06	2.22939e-05
OCRL	1327.35	0.801459	0.127842	6.26916	3.63001e-10	5.73638e-09
LAX1	63.6845	-1.21119	0.410682	-2.94922	0.00318578	0.0128899
KIAA1191	2213.89	0.691792	0.119932	5.76819	8.01272e-09	1.05549e-07
SERAC1	448.908	0.66948	0.185388	3.61124	0.000304735	0.00166229
LDB3	8.25943	6.44755	1.42197	4.53422	5.78159e-06	4.63121e-05
RPL5	40266.4	-0.873663	0.147535	-5.92172	3.1859e-09	4.44266e-08
SPATA1	102.989	-1.28223	0.421398	-3.0428	0.00234387	0.00992155
LRRC39	202.545	1.45389	0.168688	8.61881	6.76539e-18	2.34743e-16
RWDD3	130.583	0.73201	0.21665	3.37876	0.000728128	0.00357544
CCDC18	2069.65	-1.50196	0.164997	-9.10293	8.79271e-20	3.52574e-18
RPAP2	2453.54	0.60828	0.216172	2.81388	0.00489482	0.018572
ZMIZ2	5509.17	1.03699	0.161459	6.4226	1.33967e-10	2.24293e-09
EEPD1	277.829	1.21746	0.236363	5.15081	2.59364e-07	2.67897e-06
WIPF3	252.366	9.35314	0.848084	11.0286	2.78316e-28	1.91918e-26
NPY	138.867	1.34119	0.368752	3.63712	0.000275707	0.00152004
INHBA	88.3282	3.74532	0.407082	9.20042	3.56545e-20	1.48425e-18
CALD1	211.457	1.16256	0.216251	5.37596	7.61772e-08	8.59968e-07
EGR2	97.799	2.99225	0.555642	5.3852	7.23637e-08	8.19592e-07
P4HA1	1029.46	0.711558	0.219982	3.23461	0.00121807	0.00562711
SLC25A16	869.445	1.13914	0.1135	10.0365	1.05381e-23	5.54458e-22
ZWINT	4451.32	-1.1919	0.22051	-5.40516	6.47488e-08	7.37629e-07
RBM19	1180.71	0.95787	0.391673	2.44559	0.0144617	0.0458288
CIT	6951.16	-1.74918	0.201395	-8.68531	3.77717e-18	1.34476e-16
HVCN1	776.834	1.27319	0.30425	4.18469	2.85558e-05	0.000195677
DDX54	3175.51	-0.854693	0.320975	-2.6628	0.0077493	0.0272413
CDKN2C	4824.85	-1.06744	0.159426	-6.69553	2.14886e-11	3.92765e-10
RNF11	2165.58	0.873993	0.158628	5.5097	3.59446e-08	4.26757e-07
SSPN	38.2481	1.44408	0.448266	3.22148	0.00127532	0.00586183
ITPR2	2577.03	1.55158	0.26582	5.83695	5.31646e-09	7.21195e-08
PRDX4	1158.12	0.978731	0.325705	3.00496	0.00265612	0.011038
ADGRE5	5385.47	1.65031	0.128149	12.8781	5.97888e-38	6.7465e-36
GIPC1	1337.74	1.42325	0.145306	9.79486	1.18465e-22	5.73568e-21
EBPL	1061.42	-0.628711	0.234776	-2.67792	0.00740802	0.0262759
GUCY1B2	24.8505	-1.38582	0.449744	-3.08134	0.00206071	0.00890939
CENPK	2245.39	-1.39226	0.134405	-10.3587	3.8217e-25	2.22514e-23
ITIH5	52.4143	3.21312	0.968797	3.31661	0.000911183	0.00436005
PFDN5	457.81	1.07333	0.170821	6.28337	3.31317e-10	5.26311e-09
NR4A1	1970.25	2.54295	0.181172	14.0361	9.36662e-45	1.3605e-42
CDK2	3184.45	-0.912868	0.142689	-6.39762	1.57814e-10	2.61812e-09
IKZF4	613.231	0.63978	0.168119	3.80552	0.000141505	0.000837652
SMUG1	738.452	0.647893	0.107507	6.02649	1.67559e-09	2.41071e-08
TUBA1B	14053.1	-1.20511	0.35935	-3.35359	0.000797703	0.00388079
EEF1AKMT3	453.726	-0.596883	0.134473	-4.43867	9.05169e-06	6.95678e-05
STIL	2502	-1.97058	0.187381	-10.5164	7.25691e-26	4.42332e-24
HJURP	4964.02	-1.855	0.167043	-11.1049	1.18763e-28	8.33693e-27
ACVR1C	164.356	2.13201	0.500402	4.2606	2.0388e-05	0.000144757
SLC36A1	32.2004	2.19622	0.583948	3.76098	0.000169249	0.000982085
BATF3	147.508	-0.722352	0.236749	-3.05114	0.00227977	0.00969645
KCNJ2	2383.53	5.81979	0.248955	23.3769	7.34934e-121	8.36201e-118
RAP2C	3127.77	1.05179	0.240292	4.37714	1.20246e-05	8.99608e-05
EXOSC9	3478.06	-0.63819	0.16226	-3.93314	8.38429e-05	0.000524633
B9D2	141.624	0.781176	0.281051	2.77948	0.00544457	0.0203441
PFKFB2	7.95346	3.87733	1.07756	3.59824	0.000320374	0.00173718
C4BPB	4.72548	4.11149	1.30765	3.14417	0.00166556	0.00740621
RAB38	18.5731	2.6334	0.521235	5.05224	4.36653e-07	4.33116e-06
GPR83	42.8368	-1.00257	0.316877	-3.1639	0.00155671	0.00698359
MXD4	3182.71	1.25335	0.129434	9.68325	3.55239e-22	1.66676e-20
CKS2	2009.12	-1.00913	0.31096	-3.24521	0.00117365	0.00544769
CHPF	118.814	1.4074	0.472874	2.97626	0.00291786	0.0119421
OBSL1	5838	1.21887	0.216002	5.64285	1.67261e-08	2.09226e-07
GCNT7	17.0127	1.29729	0.475124	2.73042	0.00632537	0.0230826
CTCFL	153.812	-1.02869	0.2849	-3.6107	0.000305372	0.0016651
SNX21	47.4391	1.08922	0.322054	3.38211	0.000719312	0.00353596
TTPAL	558.647	1.67606	0.334067	5.01713	5.24491e-07	5.12792e-06
PREX1	4831.08	-1.56474	0.0977415	-16.009	1.10598e-57	2.41608e-55
PIGT	2309.42	0.961082	0.201331	4.77363	1.80934e-06	1.61463e-05
MATN4	665.852	2.70923	0.892546	3.0354	0.00240217	0.0101322
NCOA5	2145.27	1.20192	0.389343	3.08705	0.00202155	0.00876785
PARD6B	193.113	-0.881822	0.193667	-4.55329	5.28133e-06	4.25169e-05
TOX2	7.01944	-2.69486	0.857527	-3.14259	0.00167458	0.00744389
SRSF6	7757.37	0.786492	0.229827	3.42211	0.000621369	0.00310594
ZNFX1	4081.58	1.40991	0.137795	10.2319	1.42701e-24	7.90413e-23
SNAI1	89.4721	0.998438	0.29133	3.42717	0.000609902	0.00305813
DDX27	1889.38	0.957399	0.187561	5.10447	3.31721e-07	3.37185e-06
RBPJL	406.901	2.39161	0.909211	2.63042	0.00852786	0.0294753
TP53TG5	16.6758	2.16397	0.713107	3.03457	0.00240878	0.0101554
PCK1	420.579	-2.88331	0.239862	-12.0207	2.76711e-33	2.50204e-31
IQSEC2	836.718	0.764601	0.312742	2.44483	0.014492	0.0459034
MPHOSPH10	2002.78	0.904168	0.355057	2.54654	0.0108796	0.0360984
ATP8A1	12487.6	1.03254	0.314314	3.28505	0.00101965	0.00481389
SIRT5	1702.51	-0.930604	0.215927	-4.30982	1.63388e-05	0.000118377
RRP36	1871.14	0.959746	0.227877	4.21168	2.5348e-05	0.000175769
ABCC10	1211.47	1.5041	0.114041	13.1891	1.01358e-39	1.26383e-37
NQO2	1243.51	-0.8468	0.102533	-8.25877	1.47187e-16	4.5725e-15
OARD1	947.458	-0.807688	0.132347	-6.10281	1.04221e-09	1.54169e-08
UNC5CL	526.433	-1.10384	0.344312	-3.20593	0.00134628	0.00614149
RPS10	138.994	0.99872	0.246452	4.05239	5.0698e-05	0.000329936
H2BC11	15.9866	-1.79976	0.493717	-3.64533	0.000267052	0.00147649
SPDEF	6.75033	2.48438	0.925829	2.68341	0.00728752	0.0259487
APOBEC2	95.4991	1.9538	0.246266	7.93369	2.12728e-15	5.93357e-14
TREM1	22.469	7.89325	1.10291	7.15674	8.26162e-13	1.76941e-11
CDKN1A	6773.4	1.0506	0.0945683	11.1095	1.12839e-28	7.94148e-27
SOX4	20552.2	1.46767	0.320608	4.57775	4.69996e-06	3.83683e-05
NRN1	8813.89	-2.29226	0.107874	-21.2494	3.3422e-100	2.46664e-97
RPP40	274.7	1.24452	0.411266	3.02606	0.00247763	0.0103975
DEK	20158.3	-1.43393	0.116834	-12.2732	1.26156e-34	1.21729e-32
RUNX2	1997.09	6.2522	0.358557	17.4371	4.31497e-68	1.28075e-65
RAB17	276.48	1.83876	0.376172	4.88807	1.0183e-06	9.4324e-06
MYRF	222.316	0.881086	0.18069	4.87623	1.08131e-06	9.97543e-06
EMC3	1258.3	0.735852	0.301218	2.44292	0.014569	0.046099
SH3TC1	4106.69	-1.48423	0.302094	-4.91313	8.96346e-07	8.37377e-06
CNOT1	14532.5	-0.637064	0.196876	-3.23586	0.00121278	0.00560837
ABCC4	415.497	-0.688927	0.263153	-2.61797	0.00884544	0.0303712
EFNB2	2290.76	1.26918	0.194785	6.51582	7.22935e-11	1.25341e-09
HROB	816.794	-0.965887	0.126511	-7.63479	2.26186e-14	5.66647e-13
SEPTIN6	14189.7	-0.897251	0.160512	-5.58992	2.27169e-08	2.77801e-07
ARMC7	589.344	1.18645	0.337023	3.52038	0.000430927	0.00225212
MIF4GD	1371.2	-0.701925	0.203025	-3.45734	0.000545535	0.0027741
MSTO1	994.421	0.623889	0.121996	5.11401	3.15398e-07	3.21966e-06
MIR9-1HG	35.1839	1.23617	0.451592	2.73737	0.00619327	0.0226798
DDX31	989.009	0.909132	0.377094	2.41089	0.0159136	0.0495726
OPRL1	167.927	-1.30547	0.389299	-3.35339	0.000798267	0.00388284
SLC2A4RG	2397.98	-0.9181	0.268123	-3.42418	0.000616655	0.00308633
IL1B	345.951	-4.24842	0.49155	-8.64291	5.48008e-18	1.91361e-16
IL37	16.1594	-3.65877	0.631134	-5.79714	6.74552e-09	9.00733e-08
PSD4	1476.07	0.610957	0.172566	3.54042	0.000399484	0.00210631
ALKBH7	896.629	-1.04697	0.129834	-8.06396	7.38645e-16	2.14121e-14
TNFSF9	578.297	1.36898	0.3954	3.46227	0.000535632	0.00272883
THOC2	7602.49	-0.646139	0.102637	-6.29536	3.0668e-10	4.89603e-09
RPL23	21102.8	-0.754762	0.235778	-3.20115	0.00136879	0.00623062
ATG4C	1117.06	-0.713932	0.131809	-5.4164	6.08109e-08	6.97716e-07
TRIP10	1558.2	-1.21621	0.425167	-2.86054	0.00422917	0.016444
FOSB	784.807	3.85178	0.388368	9.91785	3.48183e-23	1.74776e-21
GNRH2	20.2796	1.55764	0.624661	2.49358	0.0126464	0.0409309
TMX4	1815.3	-0.860938	0.207805	-4.14301	3.42781e-05	0.000231405
RRBP1	8818.42	2.49743	0.167599	14.9013	3.23402e-50	5.77198e-48
FLRT3	256.763	4.02038	0.345052	11.6515	2.25457e-31	1.87129e-29
MCM8	2164.95	-1.1451	0.186967	-6.12461	9.09067e-10	1.35872e-08
FAM110A	1004.43	-0.695871	0.1472	-4.72738	2.27439e-06	1.98431e-05
S1PR4	1965.56	-0.968586	0.207275	-4.67295	2.96906e-06	2.52574e-05
ZNF436	1097.91	1.14869	0.358162	3.20717	0.00134048	0.00611808
ARMCX5	615.317	0.769065	0.175998	4.36973	1.24401e-05	9.26881e-05
MMP24	38.4383	0.872519	0.358205	2.43581	0.0148585	0.0468794
EIF2S2	6247.63	-0.930765	0.105494	-8.82292	1.11517e-18	4.1207e-17
PLAGL2	3972.34	0.708869	0.133732	5.30068	1.1537e-07	1.26472e-06
AMOT	847.826	-1.61163	0.308309	-5.22732	1.71986e-07	1.82954e-06
TMEM115	434.028	0.689216	0.250997	2.74592	0.00603421	0.0222011
TUBGCP3	4544.03	-1.33321	0.120234	-11.0885	1.42646e-28	9.96226e-27
UBA2	5775.76	-0.840514	0.163182	-5.15079	2.59391e-07	2.67897e-06
FFAR2	9.4319	3.45773	0.984316	3.51283	0.000443366	0.00230873
FFAR1	137.989	-0.881102	0.259326	-3.39766	0.000679637	0.00336333
THRA	4182.16	0.973807	0.176991	5.502	3.75503e-08	4.44467e-07
CCR7	243.514	-0.965544	0.202822	-4.76054	1.93076e-06	1.71124e-05
FRMD8	2531.51	0.847268	0.18598	4.5557	5.22106e-06	4.20937e-05
BCL2L12	1425.95	-0.952632	0.214049	-4.45053	8.56606e-06	6.62178e-05
FLRT1	182.848	-1.2541	0.175594	-7.14201	9.19735e-13	1.95601e-11
ATG14	1033.41	0.819168	0.174039	4.7068	2.51635e-06	2.17725e-05
KTN1	10532.8	0.626847	0.0847057	7.40029	1.35884e-13	3.1499e-12
DLGAP5	3113.24	-2.13877	0.108754	-19.6662	4.20016e-86	2.12396e-83
HSPA2	264.756	-0.871627	0.301119	-2.89462	0.00379612	0.0149734
OMG	272.977	1.31455	0.394969	3.32824	0.000873964	0.0042046
FAM78A	2141.32	-1.40927	0.184929	-7.62058	2.52536e-14	6.28623e-13
RGS13	239.175	2.32166	0.222355	10.4412	1.6069e-25	9.62271e-24
BCL11B	391.926	0.815155	0.186655	4.36718	1.25864e-05	9.36245e-05
ATP13A4	148.318	-1.12768	0.325253	-3.46709	0.000526132	0.00268594
BEST3	2357.8	-3.22707	0.579476	-5.56894	2.56292e-08	3.10082e-07
RAB3IP	1702.91	-1.88077	0.153313	-12.2675	1.35356e-34	1.30147e-32
PTPRB	65.4766	2.95702	0.556456	5.31403	1.07228e-07	1.18163e-06
YEATS4	1470.01	-1.44609	0.243769	-5.9322	2.98909e-09	4.18151e-08
IDUA	2191.95	0.869956	0.148467	5.85957	4.64066e-09	6.34564e-08
TMEM175	2395.26	0.748929	0.23881	3.13608	0.0017122	0.00758643
EMC1	3564.16	0.690638	0.199272	3.4658	0.000528664	0.00269786
SIN3B	5706.89	0.861229	0.0934944	9.21156	3.21419e-20	1.3441e-18
SLC35E1	1447.8	0.794324	0.187563	4.23497	2.28583e-05	0.000160626
KLF2	689.074	4.85884	0.230681	21.0631	1.73623e-98	1.24766e-95
UQCR11	332.831	1.09711	0.325314	3.37245	0.000745019	0.00365179
SYNGR3	9.34425	2.33622	0.714811	3.26831	0.00108192	0.00507108
PKMYT1	3168.64	-1.46345	0.180974	-8.08653	6.13901e-16	1.79292e-14
FBXL16	12.0796	1.70068	0.690727	2.46216	0.0138103	0.0441176
CHTF18	6865.75	-0.649553	0.227553	-2.85451	0.00431036	0.0167097
TUBBP1	34.1351	-1.22923	0.363823	-3.37865	0.000728427	0.00357626
KDM4B	3625.76	1.36236	0.135485	10.0554	8.69389e-24	4.61243e-22
METTL25	141.936	1.55191	0.209295	7.41495	1.21666e-13	2.84447e-12
TUBA4A	1569.35	-1.84937	0.267203	-6.92122	4.47762e-12	8.89886e-11
AKAP9	8310.54	1.24177	0.235722	5.26795	1.37952e-07	1.49427e-06
GNG11	704.526	0.918295	0.258954	3.54617	0.000390868	0.00206609
SEM1	1642.57	0.589685	0.239237	2.46486	0.0137066	0.0438377
HIP1	4283.11	0.924641	0.190224	4.86079	1.16917e-06	1.07497e-05
POR	1789.97	0.888024	0.204258	4.34755	1.37665e-05	0.000101354
GNAI1	1352.1	1.98098	0.332945	5.94988	2.68331e-09	3.78477e-08
ZNF780B	1653.58	0.664087	0.112146	5.92166	3.18716e-09	4.44266e-08
PAICS	10402.3	-1.05488	0.350405	-3.01045	0.00260859	0.0108702
VPREB3	3460.28	-3.30238	0.29508	-11.1915	4.48903e-29	3.22584e-27
SDF2L1	670.791	0.716527	0.156126	4.5894	4.44517e-06	3.64299e-05
RFPL1	7.40846	6.29331	1.51093	4.16519	3.11094e-05	0.000211793
YWHAH-AS1	35.4478	1.04391	0.411864	2.53461	0.0112573	0.0371574
GNAZ	261.762	-1.87742	0.353381	-5.31272	1.07999e-07	1.18917e-06
ADORA2A	52.3499	-0.767311	0.317384	-2.41761	0.0156227	0.0488168
ATF4	25391.2	-0.842715	0.20858	-4.04024	5.33972e-05	0.000345771
BAIAP2L2	736.169	1.70409	0.219987	7.74631	9.45992e-15	2.47198e-13
IGLL1	8214.92	-1.85866	0.329087	-5.64794	1.62379e-08	2.03772e-07
RAC2	5961.73	-0.972504	0.273731	-3.55278	0.000381185	0.00202471
LIF	119.951	1.76605	0.419856	4.20632	2.59566e-05	0.000179364
EMC4	1189.22	0.791947	0.286464	2.76455	0.00570005	0.0211569
SPECC1	715.108	-1.76348	0.10494	-16.8046	2.25779e-63	6.10432e-61
CPA4	53.9215	9.15543	1.86907	4.89837	9.66327e-07	8.99062e-06
POT1	1673.59	-0.710746	0.159742	-4.44932	8.6142e-06	6.65237e-05
LRRC4	1427.41	3.10653	0.269168	11.5412	8.17684e-31	6.49084e-29
IRF5	701.074	-1.01239	0.20995	-4.82205	1.42087e-06	1.28817e-05
LRRC17	98.9578	2.50232	0.335297	7.46299	8.4579e-14	2.0101e-12
CHN1	152.612	0.750198	0.282472	2.65583	0.00791139	0.02769
GAD1	418.495	1.48848	0.393201	3.78554	0.000153377	0.000899157
EIF2S2P4	23.7343	-2.09319	0.602672	-3.47318	0.000514339	0.00263263
ORMDL1	3561.64	0.725688	0.112003	6.47919	9.22165e-11	1.57878e-09
HAT1	2827.59	-0.916794	0.252206	-3.6351	0.000277868	0.00152948
SNRPN	129.157	1.2729	0.262579	4.84769	1.24906e-06	1.14341e-05
PSMG2	2670.77	-0.627123	0.178325	-3.51674	0.00043688	0.00227931
TWSG1	2986.14	2.19454	0.147332	14.8952	3.54258e-50	6.28163e-48
ARHGAP22	10.2469	3.13785	1.2222	2.56737	0.0102473	0.0343468
WDFY4	4561.18	0.988603	0.200633	4.92743	8.33187e-07	7.84546e-06
MYO5C	1991	-0.967233	0.0935761	-10.3363	4.82672e-25	2.76897e-23
DLL4	342.238	-2.52838	0.319158	-7.92203	2.33667e-15	6.47792e-14
IVD	3617.78	0.706704	0.162409	4.35139	1.35278e-05	9.9785e-05
KNSTRN	1490.66	-1.04467	0.172072	-6.07109	1.27044e-09	1.86116e-08
DUT	6729.46	-1.41758	0.182606	-7.76302	8.29311e-15	2.1775e-13
LOXL1	6.35019	2.01072	0.807632	2.48965	0.012787	0.041293
MBD4	2199.38	-0.619974	0.132005	-4.69658	2.64548e-06	2.27385e-05
PALLD	2250.16	0.993946	0.173724	5.7214	1.05652e-08	1.36344e-07
KCNC1	14.9305	1.71816	0.577826	2.97349	0.00294429	0.0120359
TPH1	86.9179	1.68798	0.397287	4.24876	2.14958e-05	0.000151912
E2F8	2030.36	-2.15784	0.171255	-12.6002	2.10677e-36	2.22983e-34
DCTD	2281.17	0.62426	0.210609	2.96407	0.00303597	0.0123756
PIMREG	1312.95	-1.66334	0.149941	-11.0933	1.35224e-28	9.46814e-27
AIPL1	7.70283	-3.9347	0.939347	-4.18876	2.80482e-05	0.000192392
TXNDC17	465.041	1.12237	0.423894	2.64776	0.00810266	0.0282651
MPDU1	1654.99	0.815769	0.301388	2.70671	0.00679536	0.02449
PHF20L1	4532.66	1.28675	0.151148	8.51319	1.69212e-17	5.66259e-16
AP1M2	58.9077	-1.16762	0.250793	-4.6557	3.22875e-06	2.72796e-05
CDKN2D	1819.6	-1.74549	0.208223	-8.38281	5.16791e-17	1.66612e-15
PARP2	2795.95	-0.730352	0.15952	-4.57842	4.68502e-06	3.82578e-05
HEATR5A	347.004	0.642244	0.145857	4.40324	1.06647e-05	8.06485e-05
MIS18BP1	2931.65	-1.6827	0.172032	-9.78137	1.35368e-22	6.50791e-21
TEP1	5522.7	0.593081	0.113303	5.23446	1.65469e-07	1.76709e-06
EPB41L4A	87.6291	4.00111	0.31293	12.786	1.96346e-37	2.17952e-35
ITFG1	1544.43	0.841985	0.125004	6.73565	1.63201e-11	3.02753e-10
QRICH2	621.36	0.940074	0.174488	5.38761	7.14023e-08	8.09491e-07
MAP7D3	2170.31	-0.942927	0.122614	-7.69019	1.4692e-14	3.72858e-13
FGF13	60.6498	-2.92799	0.415406	-7.04851	1.80839e-12	3.73821e-11
CDKN1C	574.521	-0.587237	0.139776	-4.20127	2.65421e-05	0.000183072
SGO1	747.197	-1.71258	0.211268	-8.10619	5.22305e-16	1.53361e-14
CDH15	23.5379	2.14044	0.84321	2.53845	0.0111346	0.0368192
PGAP6	2202.17	0.741414	0.0786023	9.43247	4.00528e-21	1.78421e-19
DOHH	644.459	0.950278	0.339614	2.79811	0.00514023	0.0193419
SHC2	74.7074	2.27508	0.710872	3.20041	0.00137233	0.00624466
ABHD17A	4614.57	1.03352	0.141664	7.29555	2.97443e-13	6.64128e-12
SYT5	58.3289	2.52716	0.288233	8.76779	1.82212e-18	6.61659e-17
CBFA2T3	4676.76	-1.48522	0.314657	-4.72011	2.35717e-06	2.05187e-05
KCNA5	1829.42	5.82781	0.305985	19.0461	7.08042e-81	2.92947e-78
NXNL2	25.5866	-2.48222	0.460032	-5.39575	6.82372e-08	7.75428e-07
GDPD2	31.0245	3.54591	0.612449	5.78973	7.04989e-09	9.37707e-08
THEM6	661.569	-0.848015	0.209477	-4.04826	5.15998e-05	0.000335166
GADD45G	82.1217	2.43902	0.447456	5.45085	5.01285e-08	5.8175e-07
RPL36	7627.42	-0.64746	0.23739	-2.72741	0.00638344	0.0232448
NCAN	7.64042	3.7907	1.05561	3.59102	0.00032939	0.00177819
RTN4IP1	503.668	-0.760255	0.209789	-3.6239	0.000290198	0.00159061
QRSL1	3007.04	-1.46464	0.249638	-5.86705	4.43625e-09	6.09974e-08
MAS1	37.07	6.15575	0.885765	6.94964	3.66221e-12	7.35323e-11
AFDN	7120.52	-0.782644	0.153513	-5.09821	3.42878e-07	3.47033e-06
STK33	290.7	-0.750011	0.253038	-2.96402	0.00303646	0.0123756
CACNG6	792.18	1.10984	0.391358	2.83588	0.00456993	0.0175416
FCHO1	4591.93	-0.921189	0.178387	-5.16399	2.41738e-07	2.51185e-06
UNC13A	1099.97	-3.08726	0.433679	-7.11877	1.08897e-12	2.29625e-11
PXDN	9066.42	1.15655	0.0789964	14.6405	1.54971e-48	2.50402e-46
IQCN	245.436	1.958	0.370763	5.281	1.28483e-07	1.40115e-06
LSM4	3063.82	-0.846988	0.200767	-4.21876	2.45651e-05	0.000171035
JUND	2805.08	0.812023	0.119206	6.81195	9.62815e-12	1.83986e-10
HRC	264.211	5.97133	1.19656	4.99043	6.02437e-07	5.81093e-06
LSP1	6.65291	4.63267	1.45654	3.1806	0.00146971	0.0066413
TNNI2	33.556	3.63926	1.12125	3.24571	0.00117158	0.00544086
H19	36.1934	4.08663	1.15261	3.54554	0.000391805	0.00207014
COL5A1	22969	-2.15765	0.424467	-5.0832	3.7112e-07	3.72443e-06
CYP2E1	111.176	1.98227	0.569795	3.47891	0.000503458	0.00258371
CEP85	4676.47	-0.755201	0.132068	-5.71827	1.07614e-08	1.38745e-07
LAMA5	3213.95	1.89688	0.330774	5.73466	9.77095e-09	1.26693e-07
ADRM1	1511.34	0.969792	0.386109	2.5117	0.012015	0.0391942
ASS1	7103.51	-2.18157	0.0895674	-24.3568	4.91654e-131	7.45867e-128
EIF2S3	13583.3	-0.749074	0.163288	-4.58743	4.48726e-06	3.67417e-05
TMEM160	638.427	-0.597798	0.236544	-2.52721	0.0114972	0.037812
GMFG	3383.83	-1.02491	0.117824	-8.69864	3.35895e-18	1.20213e-16
MAP3K10	2287.54	0.660421	0.240633	2.74451	0.0060601	0.0222783
THEMIS2	1208.14	-1.18057	0.228112	-5.17539	2.2744e-07	2.37412e-06
CLIP1	2879.16	0.650516	0.165414	3.93264	8.40163e-05	0.000525414
DNMT1	20367.5	-1.035	0.109223	-9.47607	2.64033e-21	1.1937e-19
SLC6A8	1390.17	1.99122	0.268202	7.42432	1.13361e-13	2.6617e-12
PLXNA3	3579.09	1.12398	0.182433	6.16108	7.22494e-10	1.09667e-08
MPP1	5001.81	-1.91899	0.165081	-11.6245	3.09269e-31	2.54374e-29
CASZ1	361.832	0.889036	0.138297	6.42846	1.28901e-10	2.16343e-09
HABP4	761.343	1.21622	0.195192	6.23091	4.63722e-10	7.23178e-09
POLN	39.1653	2.21092	0.418544	5.2824	1.27502e-07	1.39212e-06
AKAP12	5009.34	-1.62025	0.234974	-6.89542	5.37059e-12	1.05672e-10
LATS1	2328.98	0.613988	0.239885	2.55952	0.0104818	0.0349385
LILRB2	223.372	4.23712	0.923936	4.58594	4.51942e-06	3.6994e-05
AAR2	1580.54	0.902469	0.316743	2.84922	0.00438269	0.0169348
C1QL1	316.989	-2.94342	0.380205	-7.74168	9.81112e-15	2.55886e-13
PYY	17.5885	1.28941	0.480174	2.6853	0.00724641	0.0258225
TEX101	18.5826	-4.21143	0.681287	-6.18158	6.34649e-10	9.70889e-09
ZNF141	1796.75	-1.33534	0.178798	-7.46845	8.11461e-14	1.93187e-12
GSE1	11880.3	-1.37337	0.116717	-11.7667	5.79468e-32	4.94485e-30
GINS2	2046.56	-1.53021	0.363875	-4.20531	2.60727e-05	0.000180017
SH3BGRL	7530.38	0.979094	0.206564	4.7399	2.13824e-06	1.87745e-05
F12	119.171	-0.865927	0.235751	-3.67306	0.000239663	0.00133867
PRR7	487.913	-0.748969	0.174918	-4.28184	1.85357e-05	0.000132953
NFATC1	1221.53	1.10861	0.143552	7.7227	1.13887e-14	2.945e-13
RAB11FIP4	365.156	-1.78099	0.183785	-9.6906	3.30581e-22	1.55373e-20
RLIM	4932.4	-0.847043	0.0993311	-8.52747	1.49589e-17	5.06802e-16
ABCB7	2016.14	-0.802317	0.0932847	-8.60073	7.92075e-18	2.72408e-16
HAUS8	1162.56	-1.22127	0.172508	-7.07947	1.44704e-12	3.00717e-11
SH3BP5	27.8165	1.88048	0.515826	3.64558	0.000266787	0.00147562
HACL1	822.805	-0.768966	0.148534	-5.17703	2.25451e-07	2.35697e-06
TBC1D5	5257.68	-0.882541	0.092693	-9.52112	1.71328e-21	7.82351e-20
LRRC4B	1948.08	0.994634	0.175877	5.65528	1.5559e-08	1.95612e-07
KIF3A	1208.36	0.913242	0.128213	7.12285	1.05719e-12	2.23789e-11
TUBG1	2248.34	-0.613376	0.191898	-3.19636	0.00139171	0.00632218
PSME3	5160.12	0.999168	0.41155	2.42782	0.0151899	0.0477099
PSMC3IP	894.881	-0.765642	0.234109	-3.27045	0.00107378	0.00503722
VPS25	1465.86	0.67797	0.256198	2.64627	0.00813851	0.028372
TMEM204	20.5678	1.69291	0.502397	3.36966	0.000752603	0.00368171
BARX1	397.366	-1.73006	0.330497	-5.23472	1.65235e-07	1.76621e-06
NINJ1	494.706	-0.739759	0.154974	-4.77343	1.81116e-06	1.61519e-05
IL13RA1	121.143	5.39066	0.769757	7.00306	2.50429e-12	5.09953e-11
WDR44	1108.56	0.632747	0.152205	4.15721	3.22158e-05	0.000218835
TOP2A	18607.9	-2.27029	0.111869	-20.2942	1.44738e-91	8.98266e-89
RARA	499.655	0.699519	0.278418	2.51248	0.0119887	0.0391223
KHDRBS3	1290.54	0.94482	0.339569	2.78241	0.00539566	0.0201807
MCCC2	2987.38	0.652648	0.259205	2.51788	0.0118063	0.0386703
ZNF304	869.104	0.611752	0.235658	2.59593	0.00943351	0.0320041
ZSCAN5A	174.317	0.893105	0.227215	3.93066	8.47127e-05	0.000528985
SELENOS	781.861	0.750255	0.225008	3.33435	0.000854992	0.00412132
LIN28A	5.68866	-3.4443	1.17056	-2.94244	0.00325632	0.0131325
THAP1	271.529	-0.663175	0.171466	-3.86769	0.000109873	0.000666881
C19orf12	1468.23	0.784706	0.145728	5.38473	7.25547e-08	8.21415e-07
ACTR10	1891.15	0.69077	0.207781	3.32451	0.000885744	0.00425229
LGALS3	33.3071	-1.76379	0.367146	-4.80404	1.55499e-06	1.4e-05
BRME1	757.49	-1.57567	0.178917	-8.80673	1.28845e-18	4.72264e-17
SPATA6	596.713	-1.00433	0.330271	-3.04093	0.00235847	0.00997566
LRRC41	3189.97	0.755125	0.118274	6.38456	1.71894e-10	2.8362e-09
NUP210	121.509	5.52322	1.13581	4.86279	1.15743e-06	1.06525e-05
FCRLA	120.591	-1.97838	0.244619	-8.08761	6.08461e-16	1.77893e-14
ENOSF1	3875.12	-0.736613	0.25801	-2.85497	0.00430406	0.0166924
ARFIP2	1978.99	0.936536	0.123468	7.58524	3.31877e-14	8.14246e-13
TRIM5	2704.23	0.589492	0.204232	2.88638	0.00389696	0.0153048
TRIM22	4959.77	1.06185	0.146207	7.26266	3.79553e-13	8.35169e-12
TIMM10B	1110.87	0.873033	0.260418	3.35243	0.000801065	0.00389506
MRPL35	1959.5	0.592252	0.237491	2.49378	0.0126391	0.0409122
PTPRE	7694.85	-0.970253	0.347746	-2.79012	0.00526885	0.0197741
RAP1GAP2	9621.02	0.659855	0.165133	3.99589	6.44513e-05	0.000410729
MYBBP1A	3275.2	1.41251	0.506516	2.78868	0.00529228	0.0198457
RPA1	8777.09	-0.771884	0.236764	-3.26015	0.00111355	0.00520413
SEC61G	1137.52	0.914761	0.274187	3.33627	0.000849106	0.00409584
LANCL2	493.052	1.52744	0.50197	3.04289	0.00234318	0.00992155
FIGNL1	3923.61	-1.11471	0.131033	-8.50709	1.78357e-17	5.95401e-16
GRSF1	6131.58	0.619694	0.219708	2.82054	0.0047943	0.018254
ENAM	63.3812	7.94199	1.04238	7.61912	2.55417e-14	6.35216e-13
JCHAIN	867.637	6.43434	0.565371	11.3807	5.21503e-30	3.95574e-28
UTP3	1931.51	0.621687	0.181206	3.43082	0.000601759	0.00302251
H3-3B	15359.1	0.935109	0.137822	6.78488	1.16181e-11	2.20316e-10
KDM6B	5839.42	1.12185	0.216751	5.17572	2.2703e-07	2.37165e-06
GPS2	163.135	0.712777	0.251547	2.83357	0.00460307	0.0176416
RIDA	583.171	-0.595565	0.185012	-3.21906	0.00128611	0.00590348
VPS13B	3778.57	0.854159	0.151258	5.64704	1.63229e-08	2.04745e-07
PRMT7	2236.34	0.669071	0.175766	3.8066	0.000140892	0.00083438
BTBD3	3214.7	1.74247	0.0944667	18.4453	5.68559e-76	2.18671e-73
PCNA	13731.8	-1.27514	0.364765	-3.4958	0.000472645	0.00244349
RIN2	15.8059	4.56886	0.830975	5.49819	3.83714e-08	4.5332e-07
NES	277.1	11.5166	1.05924	10.8725	1.55922e-27	1.04614e-25
BCAN	21.2245	5.76772	1.02545	5.62458	1.85962e-08	2.31241e-07
RAB25	8.39592	2.0438	0.845842	2.41629	0.0156797	0.0489636
SYT11	230.075	0.873866	0.24018	3.63838	0.000274357	0.00151351
IGHMBP2	1449.99	0.665954	0.153116	4.34935	1.3654e-05	0.000100634
TESMIN	526.884	-1.40601	0.251686	-5.58636	2.31877e-08	2.82925e-07
DPH2	790.647	1.3949	0.493734	2.82521	0.00472497	0.0180328
NASP	22979.5	-0.871323	0.157637	-5.52741	3.24989e-08	3.88209e-07
OSER1	2510.81	-0.839715	0.132152	-6.35417	2.09559e-10	3.41842e-09
ATP8A2	15.0284	3.14051	0.669041	4.69405	2.67849e-06	2.29644e-05
MTUS2	81.5996	2.11989	0.269829	7.85644	3.95209e-15	1.06745e-13
POMP	2530.55	0.923922	0.367616	2.51328	0.0119614	0.0390673
HMGB1P5	243.777	-1.66868	0.353887	-4.7153	2.41355e-06	2.09561e-05
GPR12	5.14347	-3.28347	1.09719	-2.99263	0.00276587	0.011409
CHRM3	11.4036	6.91545	1.30005	5.31939	1.04118e-07	1.14864e-06
MYH10	13325.9	-0.688197	0.112069	-6.14086	8.20745e-10	1.23391e-08
MYBPH	140.652	5.07572	0.788041	6.44093	1.18744e-10	2.00158e-09
PIK3C2B	3306.13	-0.699371	0.252875	-2.76568	0.00568048	0.0210986
LGR6	223.414	8.74344	1.96596	4.44742	8.69069e-06	6.70008e-05
DCLK1	61.8391	7.90184	1.11292	7.10009	1.24679e-12	2.60891e-11
TPT1	25371	-0.670464	0.170953	-3.92192	8.78458e-05	0.000546923
RFC3	1301.95	-1.15906	0.309402	-3.74614	0.000179577	0.00103585
STARD13	138.992	2.12277	0.472358	4.49399	6.98994e-06	5.515e-05
MORC4	29.3258	1.75886	0.360698	4.87628	1.08106e-06	9.97543e-06
SLF1	1040.79	-0.771105	0.115071	-6.70113	2.06816e-11	3.79282e-10
MACROD1	1515.02	-0.865515	0.20476	-4.22697	2.3686e-05	0.000165674
WDR74	1157.99	1.02387	0.388352	2.63645	0.00837787	0.0290456
RTN3	9307.95	-1.18453	0.174622	-6.78341	1.17369e-11	2.22415e-10
CEP20	2600.04	-0.585798	0.186823	-3.13557	0.00171518	0.00759717
PDZD2	35.7599	1.40613	0.391627	3.59048	0.000330072	0.00178036
MYO18B	4311.83	-0.778199	0.181694	-4.28301	1.84384e-05	0.00013236
SLC2A11	1131.63	1.08341	0.154273	7.02269	2.17642e-12	4.46853e-11
GIMAP6	34.5122	1.68223	0.545921	3.08145	0.00205996	0.00890757
GIMAP4	266.223	-3.13333	0.203748	-15.3785	2.28228e-53	4.48361e-51
ADCK2	1342.06	-0.848252	0.154913	-5.47566	4.35895e-08	5.10201e-07
BTG1	2338.14	0.728238	0.101264	7.19151	6.40786e-13	1.38324e-11
DYDC2	10.7525	-3.82087	0.860088	-4.44242	8.89531e-06	6.85203e-05
KRAS	4757	1.0264	0.11074	9.26859	1.8862e-20	8.02279e-19
IMPA1	2150.89	1.82636	0.38517	4.74169	2.11943e-06	1.86214e-05
LRRCC1	940.019	-0.714708	0.191227	-3.73748	0.000185875	0.00106789
SWAP70	5696.5	1.14532	0.296425	3.86378	0.000111644	0.000676674
RRAS2	1255.25	1.475	0.232711	6.33833	2.32267e-10	3.77082e-09
HSD17B4	6554.41	0.74719	0.232912	3.20803	0.00133646	0.00610281
TEX15	3.47934	5.20287	1.88469	2.7606	0.00576951	0.0213846
RNF122	1046.03	1.32266	0.183757	7.19784	6.11735e-13	1.32157e-11
GSC	62.9031	-2.13387	0.364875	-5.84823	4.96819e-09	6.76641e-08
UNC79	1653.04	-1.51346	0.495655	-3.05346	0.00226219	0.00963407
LOXL2	251.989	1.06028	0.199081	5.32589	1.00462e-07	1.11021e-06
CCNB1	2813.46	-1.47295	0.18484	-7.96876	1.60273e-15	4.51658e-14
IRAK2	164.051	-0.765258	0.278573	-2.74707	0.00601304	0.022153
BHLHE40	207.594	2.03596	0.417536	4.87613	1.08188e-06	9.97737e-06
EDEM1	17628.6	-1.57436	0.108815	-14.4682	1.9239e-47	2.985e-45
CHL1	18.3723	2.39429	0.615401	3.89062	9.99899e-05	0.000613854
VAV3	6037.35	-0.722132	0.248043	-2.91132	0.00359909	0.0143057
PSRC1	1655.71	-1.75706	0.235386	-7.46457	8.35692e-14	1.98783e-12
PTPN22	468.805	-1.42151	0.163827	-8.67687	4.06797e-18	1.44453e-16
WNT2B	258.833	1.03897	0.368751	2.81754	0.00483931	0.0184049
CD101	15.9005	-2.21496	0.667665	-3.31747	0.000908361	0.00435092
NAPG	1807.92	0.608055	0.103904	5.85207	4.85504e-09	6.62221e-08
TMEM106C	5834.43	-1.21238	0.111803	-10.8438	2.13359e-27	1.41413e-25
PLEKHA8P1	155.819	0.886665	0.17727	5.00177	5.68057e-07	5.51046e-06
KIDINS220	4818.22	0.763591	0.116106	6.57666	4.8114e-11	8.52595e-10
GRHL1	62.5539	1.25403	0.340204	3.68613	0.000227691	0.00128118
ROCK2	3098.35	0.589168	0.108657	5.42229	5.88408e-08	6.76817e-07
RSAD2	738.641	-0.693594	0.246928	-2.80889	0.00497129	0.0188151
MYCN	78.7621	-2.44111	0.487512	-5.00729	5.5203e-07	5.37216e-06
CMPK2	706.413	-1.56044	0.292325	-5.33802	9.39675e-08	1.04096e-06
IL6ST	1280.01	1.03481	0.130468	7.93156	2.16416e-15	6.03028e-14
TIMM17A	1751.58	0.913452	0.322241	2.83468	0.00458713	0.0175923
RPS15A	3134.5	-0.670875	0.158354	-4.23655	2.2698e-05	0.000159582
IL15RA	283.271	-0.621606	0.237457	-2.61776	0.00885091	0.0303862
CABLES1	298.562	1.76862	0.16604	10.6518	1.71059e-26	1.0763e-24
DOCK2	6087.91	-1.17751	0.127765	-9.21623	3.07719e-20	1.29474e-18
SOX5	9.8272	6.70039	1.31285	5.1037	3.33081e-07	3.38121e-06
KLRD1	19.8225	2.60555	0.996567	2.61453	0.00893516	0.0306408
LRP4	241.563	-1.6234	0.261775	-6.2015	5.59272e-10	8.61854e-09
DDB2	6215.14	-0.809721	0.304	-2.66355	0.00773199	0.0271909
ACP2	1016.8	1.405	0.127741	10.9988	3.8733e-28	2.66418e-26
RBMX2	968.011	-0.655904	0.182882	-3.58649	0.000335153	0.00180442
YARS1	10207.9	-0.835468	0.196913	-4.24283	2.20715e-05	0.000155537
PHC2	6520.21	1.62451	0.10739	15.1272	1.07187e-51	1.99112e-49
CDCA8	3193.08	-1.6416	0.188639	-8.7023	3.25211e-18	1.16543e-16
RNF138	2816.99	-0.617775	0.254348	-2.42886	0.0151464	0.0475953
DTNA	75.7329	5.86507	0.77385	7.57908	3.48026e-14	8.51573e-13
C5AR2	100.008	-1.29966	0.480274	-2.70609	0.00680811	0.0245213
GGACT	114.48	0.971501	0.325397	2.98559	0.00283034	0.0116398
COL4A2	1625.17	4.8435	0.283936	17.0585	3.02457e-65	8.69389e-63
BIVM	3.2034	-3.65691	1.43997	-2.53959	0.0110984	0.0367216
CARS2	3199.82	0.896404	0.220853	4.05883	4.93198e-05	0.000321426
ACRV1	80.309	-1.48692	0.263741	-5.6378	1.72239e-08	2.14961e-07
ETS1	4358.87	-1.49836	0.25008	-5.99153	2.07881e-09	2.96429e-08
SLC37A2	502.035	-1.70824	0.498487	-3.42686	0.000610608	0.00306111
NREP	2173.82	1.9339	0.15378	12.5758	2.86991e-36	2.99116e-34
WDR36	3623.8	0.625012	0.219989	2.8411	0.00449577	0.0172983
C9orf40	1213.35	-1.69386	0.173288	-9.77483	1.44404e-22	6.90586e-21
ANXA1	12.7215	1.57242	0.639699	2.45805	0.0139692	0.0445367
CTSL	767.014	-1.75697	0.198667	-8.8438	9.25165e-19	3.43721e-17
CEMIP2	680.594	1.03437	0.10816	9.56337	1.13983e-21	5.24877e-20
GOLM1	2482.61	0.589168	0.128232	4.59456	4.33672e-06	3.56803e-05
PSAT1	2283.07	-1.41069	0.316145	-4.46216	8.11368e-06	6.30507e-05
ADAM19	187.493	1.96768	0.415485	4.73587	2.18121e-06	1.91211e-05
TAOK3	3581.32	0.726665	0.131246	5.53668	3.08261e-08	3.69196e-07
MSI1	15.3068	1.21681	0.494377	2.46131	0.0138432	0.0441969
OASL	11.4377	2.41523	0.894294	2.70071	0.00691916	0.0248509
HRK	331.894	-4.18469	0.209123	-20.0106	4.44886e-89	2.47928e-86
P2RX4	721.831	0.701712	0.235412	2.98078	0.00287518	0.0117983
DTX1	6006.32	-1.9653	0.147905	-13.2876	2.7307e-40	3.53399e-38
DMTF1	5894.58	0.697023	0.163986	4.25051	2.13283e-05	0.000150845
TMEM243	1528.51	-0.916818	0.121104	-7.5705	3.71797e-14	9.08109e-13
TMEM60	454.846	-0.744728	0.164989	-4.5138	6.36776e-06	5.06066e-05
CD36	7.28075	3.08018	1.14892	2.68092	0.00734195	0.0260914
GARIN1B	49.0488	1.73108	0.587914	2.94445	0.00323526	0.0130592
MDFIC	13.6115	5.69904	1.1064	5.15098	2.59129e-07	2.67897e-06
NT5E	333.771	-0.839535	0.213456	-3.93306	8.38706e-05	0.000524686
EPHA7	1102.26	1.68782	0.248833	6.78296	1.1774e-11	2.22964e-10
PRR5L	212.448	-1.7004	0.229463	-7.41035	1.25962e-13	2.93735e-12
CD63	2892.96	1.34355	0.244364	5.49814	3.83812e-08	4.5332e-07
GDF11	2976.78	0.89912	0.258395	3.47963	0.000502105	0.00257725
[truncated: 5,384 more rows]

## Sheet: Supplemental Table 4
Supplemental Table 4. Differential Protein Expression Between MH and Vector Group
Protein Name	logFC	AveExpr	t	P.Value	adj.P.Val	B
HBA1	2.9034	6.4031	26.5292	4.53129e-09	3.97213e-05	11.0083
H1-6	-2.02514	6.59402	-21.2819	2.57337e-08	0.000112791	9.59797
HABP2	1.4332	5.73914	18.6289	7.30816e-08	0.000146801	8.7141
FAM117B	2.85952	5.18425	18.3738	8.14005e-08	0.000146801	8.50579
ITIH2	2.14593	4.53232	18.3075	8.37329e-08	0.000146801	8.35028
H1-10	-1.09117	8.88076	-16.7089	1.70742e-07	0.000249454	8.14197
CD99	-1.09062	7.04239	-15.4688	3.10773e-07	0.000302985	7.51863
MPO	1.51216	5.5076	15.4168	3.1899e-07	0.000302985	7.41701
SCPEP1	1.47317	4.39842	15.2579	3.45637e-07	0.000302985	7.20574
ITM2C	2.01834	3.68467	15.5088	3.04623e-07	0.000302985	7.1507
GC	1.76201	4.76788	14.5729	4.93041e-07	0.000360167	6.95268
PCLAF	1.50733	3.86667	14.7676	4.44993e-07	0.000354619	6.86381
ANXA2	0.944776	7.89004	14.0479	6.54291e-07	0.000382368	6.81527
STOM	1.40702	4.62531	14.2533	5.85051e-07	0.000366326	6.77736
LIPA	1.57973	4.31657	13.8295	7.38171e-07	0.000387039	6.5345
FDFT1	1.76789	4.70168	13.6973	7.9474e-07	0.000387039	6.51715
MME	-1.1746	6.72276	-13.2116	1.04864e-06	0.000472138	6.34431
MICAL2	2.0837	6.66306	13.0834	1.12999e-06	0.000472138	6.27422
LAPTM5	1.13167	5.79223	13.0818	1.13106e-06	0.000472138	6.26126
DAB2	1.9959	2.95768	13.7857	7.56379e-07	0.000387039	6.21201
A2M	2.90883	2.71244	14.2594	5.83115e-07	0.000366326	6.10328
HGF	1.52074	6.05415	12.5243	1.57811e-06	0.000564509	5.94102
FAM160B1	1.18094	5.84568	12.4916	1.60994e-06	0.000564509	5.91936
SERPINF2	2.21977	3.09706	12.9531	1.22005e-06	0.000486134	5.86803
BNIP3	-1.46562	4.25769	-12.6334	1.47697e-06	0.000562918	5.85338
S100A4	0.91441	8.12188	12.2229	1.90018e-06	0.000640652	5.73284
OAT	0.988083	5.03733	12.0299	2.14495e-06	0.000696393	5.62012
SARS1	-0.960553	8.24332	-11.9268	2.29003e-06	0.000716942	5.54496
SERPINH1	0.93434	6.77652	11.4999	3.01951e-06	0.000874199	5.29223
CRK	1.77307	6.03383	11.4308	3.16038e-06	0.000874199	5.25695
ASS1	-1.18944	7.7329	-11.4353	3.15092e-06	0.000874199	5.23538
APP	1.14831	4.72542	11.4097	3.20476e-06	0.000874199	5.22696
LENG9	-1.53235	5.9235	-11.3086	3.42807e-06	0.000874199	5.1777
PLD4	1.44967	4.73082	11.2816	3.49041e-06	0.000874199	5.14659
STING1	1.63707	3.76733	11.3568	3.31949e-06	0.000874199	5.12537
ALB	1.90096	9.02447	11.0133	4.1859e-06	0.00101927	4.87749
TFRC	0.797976	6.44105	10.7465	5.03439e-06	0.00119274	4.78342
ANGPTL6	-3.03441	6.22438	-10.6697	5.31334e-06	0.0012257	4.73464
HVCN1	0.978354	4.86073	10.5442	5.80679e-06	0.00129515	4.65859
CD79B	0.901959	4.01973	10.5194	5.90988e-06	0.00129515	4.61686
CD79A	1.24811	5.62442	10.4177	6.35635e-06	0.00134203	4.56714
C4A	1.29059	4.3947	10.4017	6.42997e-06	0.00134203	4.55088
CXCR4	-1.12395	5.62059	-10.3384	6.7306e-06	0.0013721	4.51276
PLG	1.76331	5.35956	10.2272	7.29745e-06	0.00142154	4.43151
PLCG2	-0.66582	7.25218	-10.2332	7.26565e-06	0.00142154	4.38644
HBB	1.69846	7.42388	10.1715	7.60112e-06	0.00144851	4.33109
BCL7A	-0.749358	5.54124	-10.0426	8.35986e-06	0.00152672	4.29532
TUBB4A	0.852089	7.38684	10.0511	8.30727e-06	0.00152672	4.2388
RCN2	0.700332	6.98193	9.95616	8.91601e-06	0.00155174	4.17842
SV2A	0.965262	4.79678	9.80843	9.96469e-06	0.00162633	4.12836
SMAD2	-0.691043	8.34155	-9.9395	9.02791e-06	0.00155174	4.1152
AHSG	1.66481	9.8823	9.9913	8.68514e-06	0.00155174	4.05887
PLD3	0.926684	5.0855	9.70783	1.07575e-05	0.00162633	4.04894
CLPTM1	1.30209	5.28375	9.70318	1.07957e-05	0.00162633	4.04029
SGTB	0.973308	4.46237	9.68419	1.09537e-05	0.00162633	4.03533
ERCC6	1.98995	4.81095	9.67026	1.10713e-05	0.00162633	4.02455
COX4I1	0.60926	8.82855	9.79914	1.00351e-05	0.00162633	3.96836
SERPIND1	1.60826	3.0673	9.66318	1.11316e-05	0.00162633	3.96798
TMBIM6	1.39307	2.40147	9.87035	9.50926e-06	0.00160304	3.94852
THBS4	1.8065	2.92279	9.66636	1.11045e-05	0.00162633	3.93229
CNTRL	1.46609	6.2973	9.49096	1.27174e-05	0.00176954	3.8344
UPF3B	-0.779008	6.01086	-9.41861	1.34575e-05	0.00184326	3.80538
APOA1	1.67482	4.80698	9.24243	1.54691e-05	0.00201027	3.69342
LAT2	-0.70107	7.2458	-9.32297	1.45106e-05	0.00195693	3.67613
LGALS1	0.991176	9.90955	9.50535	1.25757e-05	0.00176954	3.67064
F2	1.76574	5.50985	9.23233	1.55941e-05	0.00201027	3.6608
MMTAG2	-0.708683	6.24446	-9.19783	1.603e-05	0.00203651	3.61751
GNS	0.842014	5.47718	8.93709	1.98001e-05	0.00244461	3.42118
ADGRE5	0.68023	4.85112	8.87514	2.08349e-05	0.00246809	3.39239
POU2AF1	-1.47726	3.02004	-8.83841	2.14768e-05	0.00248924	3.32333
COX7B	0.590982	7.43411	8.91764	2.01186e-05	0.00244944	3.30938
LAMP2	0.664508	7.76375	8.83254	2.15814e-05	0.00248924	3.21144
ABHD4	0.87936	3.05533	8.50893	2.83314e-05	0.00304595	3.0877
RBFOX2	0.8491	5.09858	8.479	2.90662e-05	0.00306981	3.0444
RCSD1	-0.684762	8.55627	-8.67117	2.46922e-05	0.00281107	3.03843
DIABLO	-0.612881	6.98551	-8.56562	2.69959e-05	0.00299552	3.03537
CTSC	0.884778	5.80731	8.50228	2.84928e-05	0.00304595	3.03404
SERPINC1	1.11943	3.25173	8.38143	3.16121e-05	0.00327923	2.99589
MRTFB	-1.67571	4.93005	-8.37468	3.17972e-05	0.00327923	2.95698
C8orf33	-0.599089	5.37896	-8.31341	3.35339e-05	0.00334558	2.89632
GRN	1.16687	6.53434	8.35507	3.23419e-05	0.00329661	2.86193
NPC2	0.96822	6.86232	8.31164	3.35856e-05	0.00334558	2.80246
ORMDL2	0.928179	4.18385	8.12832	3.94546e-05	0.00380065	2.7688
CTSB	0.572115	6.95811	8.27543	3.46632e-05	0.00337619	2.76264
PCK2	-0.900745	6.0682	-8.08547	4.09856e-05	0.00390522	2.6552
SLC17A5	1.04642	2.50947	7.92007	4.75463e-05	0.00424764	2.58049
GIMAP4	-0.693243	5.17536	-7.93536	4.68931e-05	0.00423779	2.56475
TRIM72	0.992928	4.56878	7.90242	4.83125e-05	0.00424764	2.54956
DTX1	-1.18628	3.0491	-7.85753	5.03246e-05	0.00436778	2.53908
THBS1	1.4572	2.50517	7.8145	5.23408e-05	0.00445708	2.48526
CAPG	0.583511	7.19053	7.99335	4.45055e-05	0.00415038	2.48223
CTSD	0.983663	7.09984	7.95983	4.58688e-05	0.00418839	2.45599
DYNC2I2	1.05189	3.98599	7.77436	5.43026e-05	0.00457708	2.45543
VTN	1.74865	7.60437	7.96801	4.55317e-05	0.00418839	2.43532
PLEK	1.30976	5.66893	7.81388	5.23704e-05	0.00445708	2.40735
DYNC1LI2	0.743968	4.04548	7.71965	5.71097e-05	0.00476773	2.40336
DNM2	-0.563431	7.90802	-7.89916	4.84558e-05	0.00424764	2.35042
CDKN1A	0.83678	3.05279	7.63752	6.1631e-05	0.00484478	2.34985
MDH2	0.34975	10.4255	8.03744	4.27805e-05	0.00403241	2.33445
NQO1	1.47249	2.44094	7.62332	6.24527e-05	0.00484478	2.32145
F13A1	1.72659	2.93704	7.60248	6.36797e-05	0.00487318	2.31616
C3	1.54716	3.76698	7.56267	6.61003e-05	0.00495244	2.27079
RTN2	1.16216	3.51427	7.55259	6.6729e-05	0.00495718	2.26419
BST2	0.51128	6.24012	7.67809	5.93496e-05	0.00477399	2.24788
RREB1	0.794187	4.65072	7.54095	6.74629e-05	0.00496958	2.21733
MEF2D	0.548092	6.77703	7.67787	5.93618e-05	0.00477399	2.21035
NT5DC1	-0.529949	6.89875	-7.6535	6.07209e-05	0.0048389	2.18439
MDM4	-1.11617	3.77783	-7.42426	7.53431e-05	0.0052032	2.14727
FAM3C	0.758268	6.45588	7.58695	6.4612e-05	0.00488266	2.13736
FAM241A	1.41192	4.92704	7.4771	7.16549e-05	0.00514858	2.12868
FITM2	-2.60075	3.65225	-7.38467	7.82439e-05	0.00535295	2.1116
PRCP	0.936022	5.0207	7.44628	7.37806e-05	0.0052032	2.09405
ATP6AP2	0.880517	5.14938	7.44239	7.40541e-05	0.0052032	2.08075
ACADVL	0.631709	6.69065	7.52287	6.86222e-05	0.00501285	2.05516
PRKDC	1.59958	9.5956	7.70942	5.76523e-05	0.00476773	2.05312
RPL37	-0.596333	8.27378	-7.59828	6.39306e-05	0.00487318	2.03915
LRPAP1	1.0013	3.6229	7.31534	8.36278e-05	0.00559604	2.03566
DOT1L	-0.951408	6.03684	-7.43506	7.45724e-05	0.0052032	2.03067
FOXO1	-0.815213	6.00966	-7.4237	7.53828e-05	0.0052032	2.02664
RPL15	-0.463124	10.0214	-7.69061	5.86648e-05	0.00477399	2.02183
SLC38A5	0.691891	5.20385	7.37762	7.87738e-05	0.00535295	2.01494
METTL7A	0.762944	5.28302	7.33656	8.19376e-05	0.00552511	1.96992
BICD1	0.700885	4.07287	7.24108	8.98553e-05	0.0057917	1.94911
STIP1	-0.483343	10.3635	-7.63054	6.20333e-05	0.00484478	1.94111
WDR46	-0.602689	5.37123	-7.26848	8.74992e-05	0.0057917	1.90751
SEPTIN9	-0.502014	8.5574	-7.48674	7.10038e-05	0.00514396	1.90576
CD63	0.782029	4.42127	7.22197	9.15399e-05	0.00581477	1.90554
SPPL2A	1.18671	3.74531	7.1854	9.48616e-05	0.00589757	1.90412
CAP2	0.864745	5.04932	7.25125	8.89726e-05	0.0057917	1.89661
NR3C1	-1.04143	2.82666	-7.08282	0.000104915	0.00634268	1.83274
GIGYF2	0.582986	6.05767	7.24618	8.94117e-05	0.0057917	1.8275
FTH1	-0.909285	6.00508	-7.15674	9.75583e-05	0.00598039	1.75606
FBLN1	1.44019	2.97282	6.99997	0.000113899	0.00670095	1.75525
RBM12B	0.757061	6.30149	7.1705	9.62535e-05	0.00594196	1.72914
YBX3	-0.552598	7.55765	-7.21333	9.23126e-05	0.00582167	1.69238
MSMO1	0.89035	4.40939	6.97692	0.000116548	0.00681106	1.6571
ATP6V1G2	1.23293	4.08834	6.92327	0.000122982	0.0069611	1.6253
RCAN1	-0.718931	4.60223	-6.92243	0.000123086	0.0069611	1.60548
CD74	0.66233	8.22008	7.1854	9.48611e-05	0.00589757	1.60018
NUBP1	-0.554331	6.53892	-7.03409	0.0001101	0.00661055	1.58706
CCDC9	-1.16656	4.84283	-6.91402	0.00012413	0.00697513	1.57831
ITM2B	1.71563	2.48391	6.75227	0.000146259	0.00758643	1.51446
LDHA	-0.542502	11.176	-7.24243	8.9737e-05	0.0057917	1.50031
NNT	0.51301	7.07399	7.00422	0.000113419	0.00670095	1.49831
MBOAT7	0.919069	4.79827	6.83051	0.000135053	0.00726303	1.47892
UGP2	0.687787	6.90743	6.95574	0.000119043	0.00682044	1.45785
RPL23A	-0.349861	10.0291	-7.14058	9.91169e-05	0.00603374	1.45262
GOT1	-0.522862	7.97866	-7.00259	0.000113602	0.00670095	1.44426
SPRY4	1.81013	1.36209	6.95726	0.000118861	0.00682044	1.43164
TMEM30A	0.690815	5.79501	6.84565	0.000132996	0.00726303	1.43112
ELP3	-0.749692	5.06571	-6.7762	0.000142727	0.00750128	1.42152
MEF2C	-0.545673	6.37126	-6.86219	0.000130789	0.00725631	1.4171
RBM3	0.660194	7.01461	6.8987	0.000126058	0.00703838	1.40746
RACGAP1	-0.688432	5.70196	-6.79763	0.000139643	0.00746407	1.40106
RIDA	0.463025	6.18522	6.77955	0.00014224	0.00750128	1.3319
ERP44	0.590926	7.30069	6.83239	0.000134796	0.00726303	1.30028
WDR62	-0.54765	4.89654	-6.65352	0.000161898	0.00804053	1.29567
ASAH1	0.626625	4.98164	6.63739	0.000164624	0.00810727	1.27594
TK2	1.01444	2.67774	6.51656	0.000186734	0.00877689	1.2738
TUBB2A	0.883189	4.72901	6.60754	0.000169804	0.00831564	1.25804
CHD2	0.684407	6.44958	6.69346	0.00015536	0.00787443	1.23125
ASCC3	1.6989	5.64899	6.65237	0.000162091	0.00804053	1.22811
RSL1D1	-0.379943	8.54168	-6.84081	0.000133651	0.00726303	1.22603
PSAP	0.696869	7.50429	6.77497	0.000142906	0.00750128	1.22513
TARS1	-0.404622	8.56932	-6.83102	0.000134984	0.00726303	1.21264
CEP57L1	1.56864	2.9535	6.45124	0.00020004	0.00922923	1.20048
AFP	1.39683	4.01346	6.50835	0.000188352	0.00878242	1.1983
NIT2	0.551816	7.20833	6.7361	0.000148702	0.00763484	1.19807
NELFE	-0.546441	6.45302	-6.66198	0.000160488	0.00804053	1.1939
CD70	0.951954	5.49354	6.60143	0.000170886	0.00832215	1.18614
TFPI	2.14299	0.991661	6.96746	0.000117655	0.00682044	1.16702
RGN	1.51228	3.37621	6.42346	0.000206013	0.00930883	1.15469
TP53I3	0.840826	4.64244	6.51402	0.000187232	0.00877689	1.15289
B4GAT1	1.06727	2.95812	6.39195	0.000213028	0.00950062	1.14112
RNF168	-0.714782	4.01854	-6.44197	0.000202011	0.00927137	1.14033
KPNA2	0.481397	7.50915	6.69318	0.000155405	0.00787443	1.13384
CGGBP1	-0.436458	6.80549	-6.58397	0.000174021	0.00842798	1.07623
NDUFA4	0.587207	7.81252	6.65081	0.000162352	0.00804053	1.06003
UTP23	-0.595938	4.58961	-6.39227	0.000212954	0.00950062	1.04654
TUBB6	0.81221	6.94592	6.53102	0.000183923	0.00877689	1.0001
DCAKD	0.616902	4.38883	6.30202	0.000234543	0.0101203	0.94505
GM2A	0.853152	4.72789	6.31437	0.000231451	0.010094	0.928016
DNASE2	0.589371	5.42544	6.3387	0.000225491	0.00988327	0.908543
SESN2	-0.720788	5.78405	-6.35674	0.00022118	0.00979224	0.903466
APOC3	2.7625	4.76885	6.29817	0.000235516	0.0101203	0.88043
ALS2	1.00773	3.29477	6.1081	0.000289575	0.011486	0.806767
NT5C2	-0.465949	5.58318	-6.20092	0.000261637	0.0107173	0.745014
LTF	1.60309	5.14133	6.174	0.000269421	0.0109227	0.737952
NUDC	-0.413917	9.15415	-6.42633	0.000205388	0.00930883	0.718793
RPS23	0.782276	9.56637	6.43603	0.000203286	0.00928129	0.711622
NUTF2	-0.353267	8.7932	-6.38983	0.000213509	0.00950062	0.702143
CD248	1.50279	2.59291	5.97187	0.000336721	0.0128891	0.693312
HLA-A	0.476474	10.1216	6.46151	0.00019788	0.00917785	0.690376
RNASEH2A	-0.401756	7.58118	-6.29051	0.000237465	0.0101402	0.683742
LGALS3BP	0.674127	6.35352	6.21817	0.000256778	0.0106658	0.682568
ANP32E	-0.720784	7.95091	-6.30438	0.000233947	0.0101203	0.672835
AKAP12	-0.991706	7.46572	-6.25371	0.000247081	0.0103632	0.665312
DNAJC9	-0.425456	6.74001	-6.20966	0.000259163	0.0106658	0.658927
EIF2S1	-0.590104	8.71809	-6.34143	0.000224831	0.00988327	0.654306
TOR4A	1.08433	2.88667	5.93838	0.000349568	0.0131516	0.648222
MYBL2	-0.542714	6.1852	-6.15746	0.00027433	0.0110311	0.648093
IKZF2	-0.79056	5.18274	-6.07165	0.000301432	0.0119025	0.639206
RPS27	-0.548177	8.04574	-6.27312	0.000241958	0.0101971	0.627793
SORT1	0.52632	4.84327	6.04328	0.000311035	0.0122266	0.619834
TOR1B	-1.40068	4.52834	-6.03895	0.000312528	0.0122305	0.600007
DCPS	-0.403738	6.95975	-6.17545	0.000268994	0.0109227	0.598651
RNF167	0.589489	3.23584	5.91289	0.000359707	0.0132586	0.597672
ACAD9	2.44478	7.03274	6.17071	0.000270388	0.0109227	0.596403
DCAF12	-0.772473	3.74724	-5.91031	0.000360752	0.0132586	0.570284
TIMM17A	0.684801	3.44976	5.89545	0.000366831	0.0132701	0.56216
ACP1	-0.467185	8.60717	-6.23777	0.00025138	0.0104933	0.546472
NUP42	0.7267	4.32453	5.89846	0.00036559	0.0132701	0.480329
RINL	0.965552	2.31635	5.75434	0.000430523	0.0145874	0.47794
HEXA	0.845932	4.76279	5.91224	0.00035997	0.0132586	0.473087
GLMP	0.872698	1.43009	5.74595	0.000434676	0.0146553	0.467606
LMNB1	-0.313472	9.27555	-6.21363	0.000258048	0.0106658	0.461029
DCTPP1	-0.394063	7.87858	-6.11863	0.000286245	0.0114576	0.460385
EIF3J	-0.468778	7.8756	-6.10973	0.000289057	0.011486	0.450719
RAD17	1.28187	5.27027	5.8672	0.000378701	0.0134947	0.41578
HDHD5	-0.459424	6.17591	-5.95958	0.000341375	0.0129545	0.408909
STK38	-0.448721	5.57161	-5.91212	0.00036002	0.0132586	0.406102
PIK3R1	-0.546809	6.55155	-5.968	0.000338182	0.0128891	0.393488
GNG2	0.915418	5.92801	5.91819	0.000357573	0.0132586	0.363878
NDUFAF4	0.949924	5.87346	5.89266	0.000367984	0.0132701	0.361885
ORMDL3	0.589058	5.01066	5.83639	0.000392131	0.0139167	0.355624
SIL1	1.799	4.16323	5.76239	0.00042658	0.0145502	0.347213
SASH3	-0.913244	7.75604	-6.01138	0.000322233	0.0124986	0.345126
RYBP	-0.546332	4.82788	-5.785	0.000415714	0.0145502	0.324379
SCARB2	0.589858	6.16368	5.88341	0.000371841	0.0133043	0.319424
CPB2	1.09974	2.80039	5.65526	0.000482497	0.0156073	0.318704
EIF2S2	-0.636198	8.02291	-6.0028	0.00032532	0.0125628	0.309442
SMIM24	0.843178	4.0323	5.70932	0.000453335	0.014996	0.29536
FDX1	0.56506	4.07592	5.68659	0.000465354	0.0152212	0.263327
FAM136A	-0.551992	6.26637	-5.83011	0.000394933	0.0139596	0.25693
TMEM9	0.576211	3.82708	5.66092	0.000479346	0.0156073	0.256796
NOP56	-0.370783	8.02436	-5.94334	0.000347632	0.0131351	0.23733
NEURL4	1.06482	3.21739	5.59663	0.000516472	0.0162671	0.233915
DPF2	-0.449008	6.43301	-5.82529	0.000397101	0.0139799	0.233363
NEO1	0.724228	5.70378	5.77075	0.000422529	0.0145502	0.229891
SRM	-0.386513	7.47997	-5.89333	0.00036771	0.0132701	0.215032
CMSS1	-0.654703	5.33434	-5.72805	0.000443688	0.0148449	0.207432
GPX3	1.65539	2.97014	5.53774	0.000553262	0.0166663	0.193085
SLC29A1	0.717764	5.17172	5.70264	0.000456828	0.0150547	0.180389
NME3	0.475909	4.59822	5.64909	0.000485954	0.0156613	0.174528
KRR1	-0.372769	6.44756	-5.77227	0.000421795	0.0145502	0.166382
JCHAIN	2.17178	0.421056	5.47433	0.000596121	0.0173608	0.160688
TRMT11	0.948923	3.74437	5.52809	0.000559559	0.0167409	0.0953735
SNX3	0.335371	7.07553	5.7654	0.000425118	0.0145502	0.0856426
ITIH4	1.70854	4.67842	5.59329	0.000518483	0.0162671	0.0838065
PURA	-0.363804	6.67355	-5.71208	0.000451899	0.014996	0.0737429
AK2	-0.656663	7.57959	-5.77037	0.000422709	0.0145502	0.0720071
FDXR	0.803821	5.86888	5.65835	0.000480772	0.0156073	0.0648827
TP53I11	0.420382	5.52282	5.62115	0.000501952	0.0160588	0.0519679
H3-3A	1.51411	6.78675	5.69921	0.000458635	0.0150577	0.0466214
NACC1	1.19344	5.25393	5.59915	0.000514957	0.0162671	0.0439294
ATP23	-1.2355	2.80034	-5.38541	0.000662475	0.0187937	0.0304454
SSR4	0.53023	7.7634	5.75338	0.000430999	0.0145874	0.0170524
ITIH3	1.19399	4.32769	5.5061	0.000574203	0.0170626	0.0156292
NT5C3B	0.568977	5.41833	5.5774	0.000528179	0.0163972	0.00877633
PSMG4	-0.718633	5.19093	-5.55731	0.000540727	0.0164807	0.0044501
DEK	-0.294501	8.39324	-5.76875	0.000423494	0.0145502	-0.00237675
MRGBP	-0.487474	4.89357	-5.51238	0.000569978	0.0169946	-0.00793728
CARS1	-0.46817	5.75865	-5.58071	0.000526145	0.0163972	-0.0117857
ALKBH5	-0.533775	5.70914	-5.56157	0.000538037	0.0164807	-0.0188481
UHRF1	-0.642489	8.82379	-5.77344	0.000421234	0.0145502	-0.0394438
DARS1	-0.532842	8.66096	-5.73853	0.000438389	0.0147238	-0.05859
ARSA	1.0343	2.86669	5.32141	0.000715242	0.0194715	-0.0746642
CRELD1	1.47409	2.12957	5.2496	0.000779989	0.0203703	-0.0839048
ELAVL4	1.08781	4.23331	5.41352	0.000640661	0.0183531	-0.089445
PMPCA	0.447548	5.49405	5.49846	0.000579391	0.0171008	-0.0987162
DPH1	-0.618542	3.285	-5.30944	0.000725614	0.0196319	-0.107853
FIP1L1	-0.512198	7.31617	-5.60965	0.000508706	0.0162157	-0.111882
ATG3	-0.451897	5.83025	-5.50073	0.00057785	0.0171008	-0.113014
PEX7	-2.04112	3.84626	-5.36093	0.000682138	0.019028	-0.121446
ATP6V0D1	0.777146	4.9683	5.43413	0.000625168	0.0180865	-0.125565
PFKFB4	-0.609678	4.25447	-5.36235	0.000680985	0.019028	-0.128235
PITPNB	-0.417942	7.22292	-5.59145	0.000519596	0.0162671	-0.130062
ATP2A1	-1.59025	4.50318	-5.35895	0.000683756	0.019028	-0.132433
NAA80	0.75622	3.02307	5.24876	0.000780791	0.0203703	-0.160534
ATP8A2	1.12608	3.5777	5.30174	0.000732373	0.0196932	-0.160601
SCFD2	-1.0922	4.60618	-5.37224	0.000672976	0.0189357	-0.173137
DUSP6	-0.667632	4.12749	-5.31488	0.000720877	0.0195641	-0.177747
YY1AP1	-0.871174	2.67304	-5.19515	0.000833365	0.0210543	-0.192239
ATP1A1	0.40289	7.38118	5.55615	0.00054146	0.0164807	-0.195136
TCEA2	-0.55997	7.45696	-5.55195	0.000544126	0.0165045	-0.195234
ME2	0.446154	7.03164	5.52867	0.000559177	0.0167409	-0.203005
TNFAIP8	-0.829816	3.62961	-5.21263	0.00081581	0.0209806	-0.25015
PPP1R18	-0.487441	7.41643	-5.48521	0.000588515	0.0173118	-0.270269
CMTM7	-0.435105	5.54283	-5.34803	0.00069276	0.0191569	-0.271227
PRKCB	-0.560267	6.59216	-5.43068	0.000627734	0.018101	-0.273042
ACBD7	-0.467093	5.99971	-5.38204	0.00066515	0.0188087	-0.273237
ATRAID	1.23063	3.28392	5.17574	0.000853353	0.0213728	-0.280997
STX18	-0.397517	5.08577	-5.29581	0.000737629	0.0197739	-0.295893
RPL8	-0.471053	10.219	-5.63047	0.00049655	0.0159442	-0.299547
KPNB1	-0.36471	9.03836	-5.57016	0.00053266	0.0164412	-0.302769
DIEXF	0.960504	8.49907	5.54393	0.000549262	0.0166029	-0.30525
CHAF1B	-0.372815	6.37414	-5.37102	0.00067396	0.0189357	-0.321934
SNU13	-0.276402	9.16414	-5.5579	0.00054035	0.0164807	-0.323995
ACP2	0.939194	4.11813	5.20909	0.00081933	0.0210007	-0.33089
PDXP	-0.355599	6.23667	-5.34848	0.000692383	0.0191569	-0.338271
MIF	-0.39088	10.3402	-5.59407	0.00051801	0.0162671	-0.352516
TMPO.1	-0.463058	10.1674	-5.57548	0.000529364	0.0163972	-0.364902
DHRS1	0.675203	6.46825	5.34372	0.000696341	0.0191954	-0.367926
NOL7	-0.369365	6.43938	-5.3302	0.000707729	0.0193874	-0.383736
ZNF524	-2.44788	2.43582	-4.98429	0.0010811	0.0246794	-0.391463
TXNDC5	0.378447	7.86245	5.41588	0.000638868	0.0183531	-0.398286
FKBP7	0.498771	4.60281	5.18424	0.000844539	0.0212127	-0.401495
SNX4	-0.639737	4.07028	-5.12935	0.000903263	0.0220557	-0.410226
MT-ND3	-0.952569	4.52166	-5.1468	0.000884127	0.0219445	-0.419884
TMED4	0.377016	5.42455	5.22407	0.000804534	0.020804	-0.428803
CNBP	-0.322738	9.31752	-5.48177	0.000590905	0.017324	-0.431956
MGRN1	1.0155	2.22445	4.98903	0.00107472	0.0246485	-0.434042
LARS1	-0.333662	7.89815	-5.39075	0.00065827	0.0187351	-0.437411
SCNM1	-0.664238	3.25698	-5.0414	0.0010069	0.023813	-0.437816
LZIC	-0.635974	6.229	-5.27302	0.000758195	0.0199963	-0.439615
GOLGA6L2	-0.790884	7.29836	-5.33934	0.00070001	0.019236	-0.456323
MRPS21	-0.732516	4.68525	-5.14344	0.000887769	0.0219445	-0.456942
GLRX3	-0.409853	8.29301	-5.40454	0.000647542	0.0184898	-0.457291
CBFB	-0.395113	6.79845	-5.2852	0.000747128	0.0199469	-0.473659
RPS6KA2	-0.804766	3.56394	-5.02848	0.00102318	0.0239819	-0.485665
NCLN	0.560506	6.20524	5.23394	0.000794952	0.020617	-0.493528
GCHFR	-0.471188	6.94715	-5.27565	0.000755788	0.0199963	-0.50318
SDC1	-0.837664	3.17937	-4.96975	0.00110094	0.0250022	-0.521415
PPAT	-0.402283	7.08579	-5.26343	0.000767043	0.0201314	-0.52613
GSTP1	0.403108	10.1872	5.44793	0.000615028	0.0178521	-0.535395
MSI2	-0.357791	6.87708	-5.23455	0.000794359	0.020617	-0.549655
ANXA4	0.506661	6.29435	5.19509	0.000833429	0.0210543	-0.552303
APOH	1.35353	3.47545	4.95714	0.00111846	0.0250603	-0.582492
SLC25A25	2.06542	5.31292	5.09052	0.0009475	0.0229442	-0.582696
IRF2	-0.593817	4.89928	-5.05638	0.00098836	0.0235517	-0.592898
NOTCH2	-2.23213	4.44947	-5.02167	0.00103188	0.0240856	-0.594358
PLA2G15	1.00655	2.53821	4.87108	0.00124649	0.0262799	-0.595989
ACY1	0.660311	4.14699	4.99526	0.0010664	0.0246002	-0.602041
PPT2	0.719657	3.41416	4.93522	0.00114965	0.0252693	-0.608614
SPIN1	-0.49769	5.62841	-5.06321	0.000980034	0.0235369	-0.644606
NR2C2AP	-0.672007	4.28051	-4.95776	0.00111759	0.0250603	-0.646774
GALNT2	0.599641	7.43916	5.2015	0.00082694	0.0210543	-0.65031
FBL	-0.361675	8.69833	-5.27443	0.000756908	0.0199963	-0.651827
ARHGAP15	-0.652158	5.69864	-5.0581	0.000986252	0.0235517	-0.658548
FANCA	-0.776698	2.11397	-4.77143	0.00141504	0.0283202	-0.66009
TAPBP	0.482936	6.75959	5.13111	0.000901311	0.0220557	-0.681724
PMS2P11	1.4128	4.65839	4.96108	0.00111296	0.0250603	-0.687204
TWSG1	1.42118	2.0712	4.74706	0.00145995	0.0285032	-0.690994
VDAC1	0.384928	9.23259	5.28353	0.000748634	0.0199469	-0.69157
PPP6R1	-0.406375	6.72509	-5.10382	0.000932094	0.0226965	-0.695294
SMIM14	1.27293	1.44341	4.71606	0.00151932	0.028953	-0.696964
IGF2R	0.689733	5.35371	5.00404	0.00105478	0.0244619	-0.703401
EIF1AX	-0.362643	8.39345	-5.21229	0.00081615	0.0209806	-0.704227
CDC23	-0.846832	5.56163	-5.00189	0.00105761	0.0244619	-0.716008
GOSR2	0.508297	4.70533	4.94934	0.00112944	0.0250603	-0.725156
MTHFD1	-0.348082	8.58376	-5.19898	0.000829481	0.0210543	-0.745782
IQGAP1	-0.39861	7.77916	-5.1426	0.000888695	0.0219445	-0.748792
BNIP3L	-0.932017	4.38586	-4.87067	0.00124714	0.0262799	-0.762985
PLIN2	0.592839	5.6829	4.98738	0.00107693	0.0246485	-0.764859
GPD1L	0.540903	6.79391	5.06424	0.000978788	0.0235369	-0.778498
CHD6	1.14078	3.89509	4.82648	0.00131905	0.0270159	-0.78637
HERPUD2	0.681407	1.68747	4.63785	0.0016811	0.0308296	-0.803432
TMEM109	0.610047	8.19101	5.13203	0.000900297	0.0220557	-0.805708
ENO1	-0.28192	12.425	-5.32585	0.000711435	0.0194282	-0.816769
HNRNPA1	-0.290167	11.8904	-5.30298	0.00073128	0.0196932	-0.818038
FZD2	0.569911	4.76477	4.87376	0.00124226	0.0262799	-0.826938
SENP1	-0.427697	4.15837	-4.8112	0.00134497	0.0274826	-0.835251
MCCC2	0.372934	5.45598	4.91798	0.00117484	0.025555	-0.837355
ISG15	0.582218	6.09395	4.96115	0.00111286	0.0250603	-0.842604
RTN4	0.59977	7.8725	5.07514	0.000965677	0.0233199	-0.853028
ANKZF1	-0.735678	4.43062	-4.80558	0.00135464	0.0276159	-0.866858
H1-2	-1.02787	9.24263	-5.13758	0.000894183	0.022018	-0.869578
COA7	-0.44145	5.39884	-4.87625	0.00123836	0.0262799	-0.875058
TIMM8B	-0.348306	5.88197	-4.90804	0.00118964	0.0257634	-0.878276
RAB21	-0.351707	7.74199	-5.03555	0.00101423	0.0238999	-0.885282
HSP90B1	0.338927	9.8285	5.1646	0.00086506	0.0216043	-0.885443
EVL	-0.553911	4.96199	-4.83309	0.00130802	0.0268527	-0.887965
CCDC134	0.431924	4.16092	4.78422	0.00139208	0.0281174	-0.889171
UTRN	0.795789	7.92553	5.05391	0.000991395	0.0235517	-0.889403
LAIR1	-0.730516	5.30043	-4.85688	0.00126911	0.0263003	-0.889445
SLC39A14	0.691912	3.83536	4.75702	0.00144141	0.0285032	-0.895411
IPO4	-0.646809	6.69573	-4.95348	0.0011236	0.0250603	-0.900255
HOOK3	-0.428857	5.50524	-4.86052	0.00126326	0.0263003	-0.903747
SPG7	0.432698	4.588	4.79593	0.00137142	0.0278284	-0.911933
PGM5	0.541457	4.37808	4.77842	0.00140245	0.028139	-0.914776
ARL6IP1	0.561634	4.19555	4.75236	0.00145004	0.0285032	-0.914792
GLOD4	-0.341803	7.35412	-4.98881	0.00107501	0.0246485	-0.916238
CCT8	-0.389535	10.1232	-5.14555	0.000885475	0.0219445	-0.919814
IFT27	0.427921	5.52483	4.85859	0.00126636	0.0263003	-0.92352
CDK17	0.967165	3.98187	4.72151	0.00150868	0.0288876	-0.934506
TIPRL	-0.35182	6.84662	-4.93728	0.00114668	0.0252693	-0.936226
RPS17	-0.487656	8.61128	-5.05402	0.000991252	0.0235517	-0.941164
PRDX1	0.32223	11.655	5.20085	0.000827596	0.0210543	-0.942031
EIF3G	-0.345101	8.19123	-5.02072	0.0010331	0.0240856	-0.947346
ATP5ME	0.394072	8.46986	5.04065	0.00100783	0.023813	-0.947535
ZNF622	-0.767453	4.21139	-4.72878	0.00149465	0.0288876	-0.947869
SERINC1	0.530274	4.03618	4.7188	0.00151395	0.0289136	-0.951467
RRAGD	-0.971336	2.70632	-4.58756	0.00179498	0.0321118	-0.955564
ZMPSTE24	0.352262	6.73715	4.92024	0.00117151	0.025555	-0.960465
MYSM1	1.85136	7.60745	4.97898	0.00108829	0.0247792	-0.961278
STIM1	0.498656	4.24342	4.72693	0.0014982	0.0288876	-0.970317
PCLO	-0.531203	8.39735	-5.00386	0.00105502	0.0244619	-0.979477
MRFAP1	0.594129	4.65487	4.74834	0.00145756	0.0285032	-0.98226
ITGB2	0.581251	4.71795	4.75832	0.00143902	0.0285032	-0.984526
KIF22	-0.486595	6.47774	-4.86828	0.00125091	0.0262961	-0.987256
BET1L	0.553444	4.1007	4.69893	0.00155324	0.0294158	-0.994758
RPL31	-0.330906	10.3282	-5.09339	0.000944157	0.0229265	-0.999269
APOE	1.11424	4.26757	4.72278	0.00150623	0.0288876	-1.00294
TNFRSF10B	0.617721	3.22019	4.61667	0.00172807	0.0316167	-1.00704
LPCAT1	0.39158	6.41787	4.86132	0.00126199	0.0263003	-1.0087
HSDL2	0.799796	6.45339	4.86592	0.00125466	0.0263003	-1.01914
TMEM104	0.877435	2.49196	4.54204	0.00190529	0.0333369	-1.02146
UCKL1	-1.62829	4.24114	-4.68125	0.00158913	0.0297817	-1.02213
DGCR8	0.514864	4.67258	4.71432	0.00152272	0.0289548	-1.02861
ZMAT2	-0.393465	6.36877	-4.83541	0.00130417	0.0268365	-1.03017
POLE	0.657867	8.05208	4.94748	0.00113209	0.0250603	-1.03655
RPS5	-0.263424	9.73176	-5.0312	0.00101973	0.0239651	-1.04752
CTSA	0.717972	5.27061	4.75274	0.00144934	0.0285032	-1.04815
APBB1IP	-0.393865	7.54434	-4.89834	0.00120429	0.0259381	-1.05389
MAP2K6	0.416813	6.00108	4.78971	0.00138235	0.0279855	-1.05551
AMBP	2.34252	3.41025	4.58546	0.00179989	0.0321215	-1.05729
ECI1	-0.322908	7.40089	-4.88297	0.00122788	0.0262526	-1.06167
ZNF75A	-2.12054	2.01262	-4.41722	0.00224734	0.0372404	-1.07067
CDCA7	0.630937	3.5796	4.59854	0.00176941	0.0319149	-1.07087
HLA-DRB3	0.316025	7.3493	4.87518	0.00124004	0.0262799	-1.07099
CAV1	1.64507	4.67502	4.63989	0.00167664	0.0308122	-1.08793
DHFR	0.381751	7.52439	4.87882	0.00123435	0.0262799	-1.08915
GSDMD	-0.351757	6.28555	-4.78068	0.0013984	0.028139	-1.0909
ATP5MG	0.473653	8.56152	4.93485	0.00115018	0.0252693	-1.1017
PPFIBP1	0.681558	3.78874	4.58781	0.00179438	0.0321118	-1.10373
ACTR2	0.4159	8.5132	4.91922	0.00117302	0.025555	-1.11366
VDAC3	0.309481	8.10063	4.8962	0.00120754	0.0259443	-1.11524
SAMD9	-1.14667	4.95099	-4.67224	0.00160776	0.0299153	-1.12278
PRDX3	0.292396	8.88778	4.92882	0.00115893	0.0253979	-1.13086
PCGF5	-0.543738	3.23051	-4.50113	0.00201073	0.0346969	-1.1402
GGCT	-0.313273	7.0983	-4.79972	0.0013648	0.0277583	-1.1423
SEPTIN11	-0.438646	7.8259	-4.84676	0.00128551	0.0265773	-1.14531
RNF114	-0.462247	5.63043	-4.68661	0.00157816	0.0297509	-1.15266
SLC7A5	-0.662077	6.55151	-4.749	0.00145631	0.0285032	-1.1554
GALNT1	0.595578	4.6478	4.61112	0.0017406	0.0316559	-1.16046
RNF149	0.754456	3.4816	4.51631	0.00197087	0.0342112	-1.16441
SNX24	-1.8567	2.79116	-4.44891	0.0021546	0.0362519	-1.16551
MFGE8	-0.649005	3.03984	-4.46444	0.00211068	0.0356497	-1.16929
RAP1A	-0.468202	6.26206	-4.7212	0.0015093	0.0288876	-1.17316
YARS1	-0.396421	8.80259	-4.88547	0.00122401	0.0262339	-1.17495
TM9SF2	0.688277	5.69186	4.67757	0.00159672	0.029844	-1.18476
RPS12	-0.259395	10.2375	-4.9494	0.00112937	0.0250603	-1.18683
TRIM13	-0.91795	5.81008	-4.6708	0.00161077	0.0299153	-1.18743
SET	-0.33336	10.6521	-4.96611	0.00110597	0.0250514	-1.18918
ENDOD1	0.346685	5.61025	4.66627	0.00162024	0.0300275	-1.19269
SIMC1	0.948995	3.61537	4.49114	0.00203741	0.0348827	-1.19394
ADGRA3	0.982801	1.18725	4.29242	0.00265685	0.0408595	-1.20916
RECQL5	-0.540986	8.46648	-4.83548	0.00130405	0.0268365	-1.20929
TAF11	1.24853	4.94978	4.58421	0.00180285	0.0321215	-1.213
MIA3	-0.364684	7.06182	-4.74744	0.00145924	0.0285032	-1.21432
SEPHS1	-0.31169	7.1411	-4.76105	0.00143398	0.0285032	-1.21511
EPS15	-0.378764	6.25975	-4.67101	0.00161033	0.0299153	-1.24335
IRF3	-0.369224	5.70958	-4.61527	0.00173124	0.0316167	-1.25363
ATP1A3	0.429262	7.93038	4.77824	0.00140278	0.028139	-1.25585
HPRT1	-0.399191	7.76218	-4.75311	0.00144865	0.0285032	-1.26443
LNPK	-0.475682	5.73144	-4.61177	0.00173914	0.0316559	-1.26776
ACAA2	0.384187	7.48432	4.74053	0.00147224	0.0286793	-1.27105
CD82	-0.486974	4.05518	-4.48019	0.00206714	0.0351855	-1.27251
PTGS1	1.35202	1.88449	4.24948	0.00281584	0.0420505	-1.27831
TMX2	0.829658	5.68263	4.60232	0.00176069	0.0318889	-1.27877
ARHGDIB	-0.471555	10.8419	-4.9076	0.0011903	0.0257634	-1.27894
PITPNC1	0.584416	4.21919	4.49476	0.00202771	0.0348103	-1.28154
AARS1	-0.480258	8.1481	-4.76391	0.00142873	0.0285032	-1.2895
CCT6A	-0.30133	9.82384	-4.86096	0.00126257	0.0263003	-1.29084
ZNF157	-1.55965	1.74438	-4.23955	0.00285406	0.0421377	-1.29657
MTX1	0.507122	3.5909	4.43188	0.00220391	0.036799	-1.30081
GUK1	0.655542	5.7544	4.57588	0.0018226	0.0322115	-1.31243
TDP2	-0.344668	5.61794	-4.55941	0.00186235	0.0327162	-1.32942
ARMCX3	0.482516	6.78876	4.64715	0.00166093	0.0305876	-1.32967
CBR3	-0.606769	4.79378	-4.4942	0.00202921	0.0348103	-1.32986
TOM1	-0.605101	5.5137	-4.53888	0.0019132	0.0334087	-1.33274
EXOSC6	-0.327975	5.97622	-4.57942	0.00181417	0.0321273	-1.33592
PAPOLA	-0.364499	7.47213	-4.68298	0.00158559	0.0297817	-1.33691
PRPSAP2	-0.511059	6.22544	-4.59051	0.00178805	0.0321118	-1.34439
EBP	0.456453	6.07402	4.57954	0.0018139	0.0321273	-1.34878
TMEM259	0.988466	2.86432	4.33089	0.00252261	0.0397005	-1.3588
C9orf16	0.839546	4.0395	4.41356	0.00225831	0.0372836	-1.3636
ZC3H7A	0.662362	4.76878	4.47229	0.00208887	0.0354178	-1.36425
DYNLT1	0.643624	2.96345	4.32856	0.00253054	0.0397539	-1.36506
LIAS	-0.51428	3.26144	-4.34003	0.0024918	0.0395654	-1.3691
F5	0.965716	4.60107	4.44412	0.00216836	0.0363439	-1.37461
CLK3	-0.703949	4.77565	-4.44474	0.00216656	0.0363439	-1.39403
WBP1L	0.763449	1.9828	4.18994	0.00305356	0.0442699	-1.41264
DDOST	0.414204	8.42055	4.69872	0.00155367	0.0294158	-1.41372
ZNF639	-0.561068	3.72032	-4.33744	0.00250048	0.0395654	-1.42184
RMI2	-0.512586	4.20018	-4.37519	0.00237706	0.0387311	-1.42214
EMC7	0.352844	5.22888	4.46567	0.00210725	0.0356497	-1.42923
CLIC5	0.741005	4.39628	4.40983	0.00226959	0.0373269	-1.43612
AP5Z1	1.11165	3.69065	4.32248	0.00255131	0.0399372	-1.44839
INPP5F	0.615052	3.86207	4.3426	0.00248321	0.0395654	-1.45524
PAXX	-0.345854	6.20288	-4.5033	0.00200498	0.034666	-1.46498
ACAT1	0.35811	8.25637	4.6481	0.00165887	0.0305876	-1.46574
NR2F1	1.28001	2.48552	4.21585	0.00294756	0.0431149	-1.47041
HSPB1	0.582914	8.80713	4.68083	0.00158999	0.0297817	-1.47252
KBTBD11	-0.52288	4.22261	-4.33842	0.00249721	0.0395654	-1.47525
GSTA1;GSTA2	0.955722	3.21638	4.27416	0.00272325	0.0415889	-1.47812
PTRH1	0.502306	2.21764	4.17422	0.00311989	0.044908	-1.47988
EEF1D	-0.240621	10.0402	-4.72378	0.00150429	0.0288876	-1.48567
NOTCH1	0.750914	2.21479	4.17034	0.0031365	0.045073	-1.49744
RPS14	-0.30912	10.5942	-4.73413	0.00148439	0.0288519	-1.50347
CKAP4	0.70624	7.32186	4.55273	0.00187873	0.0329379	-1.51125
SUPT5H	-0.39454	6.85959	-4.51809	0.00196627	0.034199	-1.51263
NKTR	0.36955	4.55383	4.34624	0.00247111	0.0395654	-1.51496
STX3	0.409583	4.42456	4.3432	0.00248123	0.0395654	-1.51724
TPI1	-0.268999	10.9322	-4.73203	0.0014884	0.0288657	-1.52497
NME5	-0.655666	8.16026	-4.5801	0.00181255	0.0321273	-1.53384
SYNCRIP	-0.287323	10.1153	-4.69281	0.00156556	0.029577	-1.53455
MTFR1L	0.644318	3.96527	4.27566	0.00271771	0.0415766	-1.54093
UBL5	0.331083	5.84523	4.43017	0.00220894	0.0368129	-1.54096
ARHGEF12	0.805696	4.75025	4.34434	0.00247741	0.0395654	-1.54324
PROS1	2.03713	1.88304	4.07223	0.00358977	0.0476787	-1.54418
DDX52	-0.632232	8.54508	-4.60073	0.00176435	0.0318894	-1.54702
CDKN2AIPNL	1.07814	4.81346	4.35016	0.00245815	0.0395654	-1.5477
POT1	-0.413088	3.65222	-4.24213	0.00284408	0.0421377	-1.55013
ARHGEF1	-0.370647	6.88038	-4.48742	0.00204745	0.0349182	-1.55099
TBCEL	-0.395078	4.4882	-4.31005	0.00259438	0.0402043	-1.56448
LRRN2	1.17191	3.42583	4.21498	0.00295106	0.0431149	-1.57159
SYNE3	0.646707	5.62407	4.39613	0.00231146	0.0378841	-1.57865
RP9	-0.447867	5.03868	-4.33337	0.0025142	0.0397005	-1.57908
TM9SF1	0.738484	3.4786	4.21778	0.00293983	0.0430945	-1.5822
BMP2K	0.441739	4.86647	4.33216	0.00251829	0.0397005	-1.58564
MRPL36	-0.538693	3.90067	-4.25442	0.00279706	0.0420505	-1.59008
RAP2C	0.506803	4.75516	4.31397	0.00258071	0.0401108	-1.60097
ZNHIT2	0.553081	4.16549	4.25097	0.00281018	0.0420505	-1.60918
MLEC	0.326022	7.56175	4.49553	0.00202564	0.0348103	-1.61416
NAMPT	-0.524414	6.46344	-4.41352	0.00225845	0.0372836	-1.61471
TPRKB	-0.396036	5.19463	-4.3236	0.00254747	0.0399372	-1.61824
TPT1	-0.372013	9.61649	-4.6093	0.00174475	0.0316657	-1.61836
TCF25	0.441499	4.4727	4.27052	0.00273668	0.0417213	-1.61986
UTP6	-0.415783	5.87714	-4.368	0.00240005	0.039033	-1.62034
PRPS1	-0.407694	7.33848	-4.47842	0.00207198	0.0351995	-1.62078
ABCB10	0.618783	5.12443	4.31902	0.00256322	0.0400521	-1.62775
HDDC2	-0.369292	6.96208	-4.43305	0.0022005	0.036799	-1.64216
RPL4	-0.424171	9.7185	-4.59145	0.00178587	0.0321118	-1.6468
SLC12A2	0.383755	6.06398	4.35405	0.00244536	0.0395528	-1.66375
TOMM40L	0.855191	2.20886	4.04386	0.00373359	0.0485336	-1.66393
CHP1	0.536559	5.98155	4.34796	0.00246542	0.0395654	-1.6645
TMED9	0.29148	8.02142	4.48754	0.00204713	0.0349182	-1.66635
EEF1AKMT4	-0.427765	3.50768	-4.13827	0.00327748	0.0460423	-1.66889
RDH13	-0.513867	4.50934	-4.22794	0.00289948	0.0425743	-1.66994
ENPP4	0.458158	4.06649	4.21166	0.00296445	0.0432386	-1.67279
EFNB2	-0.830787	4.6216	-4.23759	0.00286168	0.0421377	-1.67372
RAB11FIP1	-0.71839	2.98889	-4.08752	0.00351472	0.0468951	-1.67526
SELENON	0.480428	3.2144	4.12491	0.0033382	0.0465251	-1.67789
AK3	0.343057	6.24712	4.35594	0.00243915	0.0395528	-1.68764
H1-0	-0.77641	8.89211	-4.50838	0.00199159	0.0345025	-1.69799
GLO1	-0.40253	9.14476	-4.52536	0.00194753	0.0339404	-1.70305
DYNC1H1	0.559464	7.35753	4.41779	0.00224563	0.0372404	-1.70496
WARS2	0.66127	5.09764	4.25044	0.00281218	0.0420505	-1.71612
SLC35A4	0.540727	5.97724	4.31584	0.00257423	0.0401108	-1.71634
TMEM106B	0.418583	5.30454	4.2613	0.00277108	0.0420265	-1.72288
MTPN	-0.54717	7.43738	-4.4107	0.00226695	0.0373269	-1.72777
CASP3	-0.389729	6.17904	-4.31406	0.00258041	0.0401108	-1.72839
IL2RG	-0.672328	5.30162	-4.24291	0.00284106	0.0421377	-1.73003
HMGB2	-0.401354	10.6315	-4.57075	0.00183488	0.0322982	-1.73034
ISCU	0.413042	4.46129	4.18951	0.00305536	0.0442699	-1.73157
ZNF551	0.639056	3.14402	4.06509	0.00362541	0.0480066	-1.73265
ADK	0.244833	7.18214	4.38935	0.00233247	0.0380752	-1.73346
SLC25A4	0.333483	5.95732	4.29723	0.00263966	0.0406666	-1.74542
SSBP2	-0.46589	5.37211	-4.24396	0.00283703	0.0421377	-1.76038
ZNF384	-0.345725	4.45603	-4.15893	0.0031859	0.0456334	-1.76787
PIGN	1.40349	3.84189	4.09664	0.00347076	0.0465921	-1.77129
LAMP1	0.931008	6.38058	4.30831	0.00260048	0.0402043	-1.77138
B4GALT3	1.115	1.45539	3.86031	0.00482796	0.0552506	-1.77226
TIMM29	-0.371313	3.9696	-4.10941	0.00341021	0.0465251	-1.77306
ECH1	0.460737	7.78854	4.39452	0.00231643	0.0378841	-1.77756
GCSH	0.655122	5.79356	4.23675	0.00286494	0.0421377	-1.78478
ERI1	-0.343401	5.67754	-4.2372	0.0028632	0.0421377	-1.78585
STUB1	0.381424	6.26382	4.28	0.00270181	0.0414057	-1.78606
DNAJC15	1.24187	4.25632	4.11331	0.00339192	0.0465251	-1.80552
FBXL19	0.453916	4.29625	4.12105	0.00335597	0.0465251	-1.81175
ZFP36L1	0.714281	5.11356	4.18681	0.00306667	0.0443314	-1.81297
RASA2	-0.777505	4.38694	-4.11602	0.00337931	0.0465251	-1.81661
EIF4G2	-0.331654	7.41113	-4.33931	0.00249423	0.0395654	-1.81761
CSNK2A2	-1.15312	6.55933	-4.25767	0.00278475	0.0420505	-1.82228
PEX10	-1.17275	2.06405	-3.87919	0.00470093	0.0547255	-1.8242
NEU1	0.534726	3.89769	4.07472	0.00357744	0.0476593	-1.8281
MYO6	0.469222	5.29364	4.18608	0.00306972	0.0443314	-1.83303
ZNF623	-0.612361	3.85982	-4.05321	0.00368551	0.0482197	-1.8398
TIMM10B	-0.484852	4.94265	-4.13865	0.00327576	0.0460423	-1.85108
PTPN6	0.494921	6.58881	4.26612	0.00275304	0.0418252	-1.85342
MPC1	0.491216	4.37051	4.09435	0.00348172	0.0466679	-1.85738
SLC25A40	-0.447774	3.72183	-4.02878	0.00381262	0.0488618	-1.86052
TMEM129	1.67419	0.447008	3.82998	0.00503981	0.0566326	-1.86396
CDCA2	-0.60109	4.69984	-4.10672	0.00342284	0.0465251	-1.86449
ATP1A2	0.476544	7.09764	4.29039	0.00266415	0.0409	-1.86662
EIF4EBP1	-0.55993	6.74188	-4.25181	0.00280697	0.0420505	-1.869
HLA-DQB1	0.571768	4.10353	4.05484	0.00367723	0.0482197	-1.87306
SHANK3	-1.168	3.39946	-3.98079	0.00407615	0.0505397	-1.87338
DCAF8	0.779208	4.57934	4.10171	0.00344655	0.0465488	-1.87351
ABRAXAS1	-0.451021	5.37616	-4.14688	0.00323899	0.0458691	-1.87502
SLC35B2	0.577565	4.62684	4.10735	0.0034199	0.0465251	-1.8755
ABHD17A	2.06057	3.2004	3.92168	0.00442799	0.0531723	-1.87599
EIF4H	-0.319784	9.15268	-4.39485	0.00231541	0.0378841	-1.88749
FAS	0.870612	2.11371	3.84486	0.0049347	0.0561058	-1.88844
SEC22B	0.274832	8.39011	4.35095	0.00245554	0.0395654	-1.89162
TP53RK	-0.376634	6.93872	-4.25223	0.00280538	0.0420505	-1.89492
ECHS1	0.501042	7.74145	4.30924	0.00259722	0.0402043	-1.89673
ATL3	-0.912872	7.17296	-4.26801	0.002746	0.0417906	-1.9006
RPL12	-0.292291	9.96019	-4.42226	0.0022323	0.0371316	-1.90135
MDK	0.80864	4.23893	4.05014	0.00370123	0.0483532	-1.902
PPM1A	-0.583347	5.631	-4.1428	0.00325718	0.0459042	-1.9072
NMNAT1	0.344141	4.9799	4.10939	0.00341029	0.0465251	-1.90727
MND1	-0.369149	5.02364	-4.10447	0.0034335	0.0465488	-1.91245
CERS4	0.545513	3.54671	3.99061	0.00402069	0.0499934	-1.91536
KATNBL1	-0.469577	2.64077	-3.889	0.00463637	0.0542622	-1.9163
CYFIP2	-0.525123	6.54456	-4.21018	0.00297042	0.0432537	-1.91692
CYP51A1	0.606505	5.10355	4.11391	0.0033891	0.0465251	-1.91698
PRR5	1.03281	2.21372	3.8379	0.00498357	0.056369	-1.92126
PSIP1	-0.546199	8.67564	-4.34145	0.00248706	0.0395654	-1.92723
AFF1	0.848124	4.74417	4.06034	0.00364929	0.0481471	-1.92899
HCK	-0.521334	5.44659	-4.1181	0.00336965	0.0465251	-1.93086
CDK10	0.959942	3.60065	3.9736	0.00411728	0.0508339	-1.93199
KDM4B	-0.320547	4.82048	-4.0727	0.00358742	0.0476787	-1.93233
HLA-H	0.7749	5.39716	4.12116	0.00335548	0.0465251	-1.93269
TMEM161A	0.888226	2.72535	3.89634	0.00458863	0.0541462	-1.94115
SDCBP	0.344689	5.53601	4.12813	0.00332346	0.0464648	-1.94164
LYRM4	0.847442	3.51227	3.95005	0.00425518	0.0514841	-1.94646
HSPA13	0.587847	4.69161	4.05639	0.00366932	0.0482197	-1.94975
ATAD1	0.315635	5.62052	4.13104	0.00331021	0.0464277	-1.95077
NDUFB6	0.427628	5.57529	4.11194	0.00339834	0.0465251	-1.9601
RANGRF	-0.391236	3.81784	-3.95889	0.00420285	0.0512408	-1.96037
ICAM3	0.570204	4.76398	4.0432	0.00373704	0.0485336	-1.9646
DCAF5	0.886059	4.60423	4.02583	0.00382827	0.0489855	-1.96561
PPP1R13L	-0.472164	6.13299	-4.15261	0.0032136	0.0457311	-1.9664
VPS28	-0.997858	5.59159	-4.1	0.00345471	0.0465488	-1.9795
PFKL	-0.339279	7.65832	-4.24109	0.00284812	0.0421377	-1.98173
JAKMIP1	0.791907	2.22688	3.80833	0.00519711	0.0571617	-1.98186
ZNF737	0.58905	2.20458	3.81822	0.00512465	0.0570809	-1.98459
PZP	3.0413	1.3202	3.69962	0.00607046	0.0624509	-1.98485
TTYH3	1.29182	2.52378	3.84908	0.00490533	0.0558443	-1.98541
TTF1	0.676339	4.98304	4.04439	0.00373085	0.0485336	-1.99049
HMX2	-0.456669	4.31392	-3.97969	0.00408242	0.0505459	-2.00203
TRABD	0.377149	5.55219	4.08973	0.00350398	0.046823	-2.00611
NTAQ1	-0.638676	2.50044	-3.82737	0.00505856	0.0566326	-2.00626
BIRC5	-0.374072	5.07015	-4.03891	0.00375933	0.0485336	-2.00706
GLUL	0.646287	4.35548	3.98828	0.00403375	0.0500848	-2.00904
SKP2	0.489282	4.24112	3.97627	0.00410196	0.0507162	-2.01125
NIP7	-0.333952	6.65219	-4.15449	0.00320535	0.045688	-2.01263
S100A13	0.324951	6.24829	4.12315	0.00334629	0.0465251	-2.01669
PLOD1	0.422989	4.1711	3.96938	0.00414162	0.050883	-2.02301
SYNE2	1.15361	5.93799	4.10755	0.00341896	0.0465251	-2.02914
TSPAN14	-0.540767	4.346	-3.96373	0.00417452	0.0511443	-2.0307
NFIL3	0.847444	3.58108	3.88319	0.0046745	0.0545566	-2.03975
UGT3A2	0.541497	2.56306	3.814	0.00515543	0.0571617	-2.04258
RNF169	-0.492818	5.68051	-4.05381	0.00368249	0.0482197	-2.04428
VIM	0.322707	10.8088	4.35399	0.00244554	0.0395528	-2.05731
ESCO1	-0.485925	5.27682	-4.03511	0.00377924	0.0486054	-2.06226
PLPBP	-0.273452	7.20253	-4.15559	0.00320049	0.045688	-2.06506
DTD2	-0.66907	4.53444	-3.94958	0.00425804	0.0514841	-2.06608
CKS2	0.459017	5.17222	4.00913	0.00391821	0.0493971	-2.0727
UBE2D1	0.862548	5.14599	3.99553	0.00399315	0.0497923	-2.0731
STON1	0.543982	2.93994	3.81975	0.00511355	0.0570297	-2.07504
YAF2	-0.655144	4.5364	-3.94966	0.00425754	0.0514841	-2.08296
IFI30	0.625756	4.0966	3.92001	0.00443836	0.0532239	-2.08851
PSMB8	-0.301966	8.29791	-4.20512	0.00299097	0.0434807	-2.08978
ORC3	-0.436637	5.47081	-4.01663	0.00387756	0.0490486	-2.0907
RETREG1	-0.600295	1.6804	-3.64432	0.00657378	0.0654095	-2.09472
RNASEH2C	-0.519521	6.8376	-4.09954	0.00345691	0.0465488	-2.10373
HLA-B	0.615898	8.85827	4.2369	0.00286437	0.0421377	-2.10482
IGF2BP1	-0.295865	9.43685	-4.25921	0.00277896	0.0420505	-2.10535
SCAF8	-0.68448	6.30159	-4.06288	0.00363651	0.048081	-2.10723
CPA1;CPB1	1.11549	3.17333	3.83547	0.0050008	0.0564182	-2.1097
NEDD4	-0.588862	4.19787	-3.90231	0.00455027	0.0539982	-2.11225
TLN1	0.310207	7.60972	4.15121	0.00321978	0.0457449	-2.12173
HDAC8	-0.647062	6.25679	-4.03892	0.00375927	0.0485336	-2.12564
RHOT1	0.325163	5.33992	3.99094	0.0040188	0.0499934	-2.12591
IGFBP2	-0.882797	4.94036	-3.93567	0.00434186	0.0522812	-2.12779
CTPS1	-0.420688	7.54901	-4.12858	0.00332139	0.0464648	-2.13036
GCAT	0.599182	3.93501	3.86761	0.00477845	0.0549933	-2.13403
RPS16	-0.559287	9.86217	-4.25367	0.00279988	0.0420505	-2.13428
ADO	-0.444639	6.69517	-4.05971	0.0036525	0.0481471	-2.14347
TNFRSF1B	-0.959308	1.29776	-3.54926	0.00754568	0.0697736	-2.14604
BYSL	-0.273637	6.17059	-4.02014	0.00385866	0.0490394	-2.14987
ANKRD40	0.437109	3.44134	3.80887	0.00519319	0.0571617	-2.15011
ACOT13	0.445725	6.07608	4.02431	0.00383636	0.0489855	-2.15424
ISOC1	-0.297932	6.37432	-4.03131	0.00379922	0.0487613	-2.15487
MLLT11	0.395132	5.39888	3.96889	0.00414448	0.050883	-2.15855
MCL1	1.88463	0.431966	3.594	0.00707048	0.0675161	-2.16235
WDR76	-0.570879	6.04882	-4.00472	0.00394239	0.0494821	-2.16552
NGFR	0.483977	3.35662	3.79661	0.00528448	0.0574503	-2.16924
ATP1B3	0.313963	7.44006	4.10016	0.00345395	0.0465488	-2.17147
TCEA1	-0.499709	7.7797	-4.11182	0.00339887	0.0465251	-2.17346
OSGEP	-0.412848	6.7023	-4.04278	0.00373924	0.0485336	-2.1775
UQCC3	-0.485847	4.06871	-3.82807	0.00505354	0.0566326	-2.17994
COL6A6	-0.458574	3.36112	-3.76856	0.00549994	0.0586527	-2.18083
ANXA6	0.291148	8.71633	4.16744	0.003149	0.0451786	-2.18903
ADIPOR1	-4.31102	1.07561	-4.00206	0.00395699	0.0494821	-2.2101
PDLIM7	0.603389	6.59361	4.00696	0.00393009	0.0494278	-2.21516
TAOK3	0.296205	4.95176	3.8937	0.00460578	0.0541937	-2.22417
CPSF4	-0.364063	5.49014	-3.92544	0.00440463	0.0529643	-2.2243
PKN2	1.5955	5.87325	3.93674	0.00433537	0.0522749	-2.23503
ARHGAP25	0.306111	6.78753	4.02381	0.00383904	0.0489855	-2.23584
ITGAM	0.850351	4.34034	3.82367	0.00508513	0.056785	-2.23668
TNS1	0.986711	4.00133	3.80493	0.00522235	0.0572239	-2.23687
SLC3A2	-0.538802	8.32316	-4.10158	0.00344719	0.0465488	-2.24444
BUD23	-0.511305	5.29299	-3.88994	0.00463024	0.0542622	-2.24843
VPS11	-0.28215	8.65494	-4.11974	0.00336205	0.0465251	-2.25017
CDC40	-0.400922	6.20632	-3.95522	0.00422452	0.0514335	-2.25177
SPCS2	0.247538	6.93725	4.01353	0.00389433	0.0491898	-2.25385
PICALM	0.446531	6.22165	3.96056	0.00419307	0.0512001	-2.2547
DGUOK	-0.599279	5.13582	-3.87211	0.00474815	0.0548905	-2.2579
TARS3	-0.826818	6.48239	-3.96323	0.00417743	0.0511443	-2.26003
PGAM1	-0.486814	9.58063	-4.15752	0.00319204	0.0456467	-2.26216
DDX59	0.834658	4.89978	3.8576	0.00484653	0.0553907	-2.26341
CENPC	-0.371706	5.24504	-3.86807	0.00477535	0.0549933	-2.26989
ANP32B	-0.235136	9.46086	-4.14293	0.00325657	0.0459042	-2.2702
NDUFB2	1.13181	5.56238	3.89466	0.00459954	0.0541929	-2.27912
COG8	0.630732	5.42394	3.87427	0.00473372	0.0548905	-2.2795
SMAP	-0.432562	7.74714	-4.0353	0.00377821	0.0486054	-2.28409
ATP5PB	0.338132	8.92928	4.11172	0.00339936	0.0465251	-2.28653
OXA1L	0.454703	5.49273	3.88233	0.00468019	0.0545566	-2.28988
TATDN1	-0.295025	5.38423	-3.86563	0.00479186	0.055053	-2.29174
FAM76B	-0.443585	5.33197	-3.86033	0.00482786	0.0552506	-2.29294
ZNF395	-0.578673	2.60029	-3.61424	0.00686599	0.0667539	-2.29498
COMT	-0.317047	6.53927	-3.95127	0.00424797	0.0514841	-2.29788
PSMD7	-0.35377	7.56089	-4.02211	0.00384811	0.0490298	-2.29865
RPL5	-0.317348	10.0512	-4.14827	0.00323279	0.0458554	-2.30517
PSMB10	-0.573703	7.51513	-4.00844	0.00392202	0.0493971	-2.30673
TAF15	-0.325227	9.09281	-4.09758	0.00346627	0.0465921	-2.30902
TMEM254	-1.14997	5.25442	-3.84298	0.00494782	0.0561094	-2.31117
EIF4B	-0.47437	8.45202	-4.0537	0.00368302	0.0482197	-2.31473
HLA-C	0.410469	7.40882	3.99917	0.00397299	0.0496114	-2.31779
HSPH1	-0.562078	7.86865	-4.01706	0.00387523	0.0490486	-2.32359
OMA1	0.496324	3.53381	3.69163	0.00614057	0.0627631	-2.32826
TSC22D4	0.567511	7.2699	3.97077	0.00413362	0.050883	-2.33035
DENR	-0.263684	8.0613	-4.0198	0.00386046	0.0490394	-2.33334
TMEM245	0.311141	4.70515	3.79602	0.00528888	0.0574503	-2.3355
DFFA	-0.428193	6.49413	-3.91641	0.00446086	0.0533765	-2.33772
TBC1D1	0.316688	5.20683	3.82756	0.00505715	0.0566326	-2.34261
UBE3A	0.657432	5.75274	3.86093	0.00482375	0.0552506	-2.3428
PINX1	-0.377887	5.37834	-3.82505	0.00507518	0.0567462	-2.34746
GLIPR2	0.381147	6.49435	3.91506	0.00446935	0.0533765	-2.34878
NDC80	0.311863	6.03387	3.87353	0.00473866	0.0548905	-2.3554
HNRNPF	-0.460802	9.62571	-4.09126	0.00349661	0.0467959	-2.35593
RAB3D	-0.624573	7.33525	-3.96046	0.00419367	0.0512001	-2.36745
PPIL1	-0.408318	6.35444	-3.8899	0.00463048	0.0542622	-2.36784
PA2G4	-0.376909	10.0673	-4.10662	0.0034233	0.0465251	-2.36838
ADA2	0.572373	3.34609	3.652	0.00650129	0.0649832	-2.36886
GPN1	-0.287162	5.28189	-3.80594	0.0052148	0.0572239	-2.37053
PRR12	0.583868	5.60233	3.83885	0.00497685	0.0563657	-2.37105
CACNA2D1	1.0168	1.54502	3.4261	0.00903795	0.078716	-2.37609
TOR3A	0.839887	3.25965	3.63785	0.0066355	0.0657047	-2.37935
RPL10A	-0.332909	9.39037	-4.06859	0.00360786	0.0478465	-2.37963
CLASRP	0.641812	5.7851	3.83294	0.00501874	0.0564754	-2.38145
SP4	-0.563427	3.84057	-3.67874	0.0062555	0.0633207	-2.38286
PPP1R7	-0.354992	6.48434	-3.88701	0.0046494	0.0543422	-2.38385
RPL32	0.786493	8.5951	4.01884	0.00386565	0.0490394	-2.39011
AUH	0.428864	3.14419	3.62998	0.00671134	0.0658809	-2.3919
RPL19	-0.372215	9.06493	-4.03467	0.00378153	0.0486054	-2.40048
KRI1	-0.404874	5.96142	-3.8335	0.00501475	0.0564754	-2.40076
MLH3	-0.472418	4.85942	-3.75085	0.00564079	0.0596468	-2.40394
CLPX	0.29647	5.49664	3.81065	0.00518001	0.0571617	-2.40408
GAN	-0.534625	4.48557	-3.72197	0.00587892	0.0611324	-2.40656
NTHL1	-0.331642	5.41557	-3.7889	0.00534279	0.0578209	-2.40818
NCF2	0.754058	4.94124	3.753	0.00562353	0.059536	-2.41717
VIRMA	0.505952	6.32153	3.85334	0.00487581	0.0555805	-2.42319
POSTN	1.18168	0.939618	3.32241	0.0105367	0.0846326	-2.42799
MYO1F	0.61731	3.19075	3.60468	0.00696174	0.0670053	-2.42815
CDC123	0.305828	4.90861	3.74431	0.00569382	0.0598465	-2.42915
STAG2	-0.368763	6.49186	-3.85398	0.0048714	0.0555805	-2.43301
UGCG	1.20074	0.0731262	3.33313	0.0103703	0.0838613	-2.43466
RPS15A	-0.231325	9.59469	-4.04141	0.00374634	0.0485336	-2.43599
ZMYM2	-0.58616	4.89797	-3.74141	0.00571751	0.0598722	-2.44049
AGPAT1	0.864995	3.60863	3.6128	0.00688037	0.0667829	-2.4421
ATP5IF1	0.918403	6.93872	3.8716	0.00475159	0.0548905	-2.44221
MID1IP1	-0.502011	3.76717	-3.62292	0.00678031	0.0662611	-2.44696
DNMBP	1.20223	3.71123	3.62629	0.00674728	0.0660119	-2.44848
F11R	0.397272	5.93489	3.81226	0.00516822	0.0571617	-2.45023
PROSER1	3.51604	7.53447	3.89187	0.00461765	0.0542605	-2.45121
ABCE1	-0.357614	7.61579	-3.91579	0.00446475	0.0533765	-2.45125
ARPC1A	0.30954	6.33464	3.83652	0.00499335	0.0564068	-2.45172
AARSD1	-0.286622	5.56165	-3.77341	0.00546201	0.0584615	-2.45312
PEX6	1.21444	5.80506	3.77196	0.00547331	0.058511	-2.45333
SF3A2	-0.375967	8.49608	-3.97084	0.00413321	0.050883	-2.45529
ZNF280B	-2.1837	1.9085	-3.32423	0.0105082	0.0846275	-2.45894
UBE2K	-0.363096	7.5269	-3.90474	0.00453468	0.0539363	-2.46205
PLEKHA2	-0.428557	4.00526	-3.64904	0.00652908	0.0651125	-2.46281
RAB3IP	-0.877678	3.63603	-3.59477	0.00706258	0.0675143	-2.4645
FAM110A	0.67782	2.80563	3.51771	0.00790122	0.072148	-2.46551
TFAM	-0.357075	7.59061	-3.902	0.00455221	0.0539982	-2.46711
CD109	0.65554	4.73274	3.70783	0.00599936	0.062017	-2.46751
CHCHD7	-0.45667	3.3143	-3.57371	0.00728186	0.0689255	-2.47102
ALG12	0.838096	3.11358	3.55125	0.00752387	0.069712	-2.47381
PRPF38B	-0.378774	6.06855	-3.79698	0.00528171	0.0574503	-2.47424
GGH	0.536965	6.04927	3.80197	0.00524434	0.0573216	-2.47537
EIF5	-0.469017	7.20048	-3.87144	0.00475267	0.0548905	-2.47813
GPR180	-0.796284	3.83996	-3.61396	0.00686881	0.0667539	-2.47884
UBR4	0.612857	6.42093	3.80894	0.00519264	0.0571617	-2.48213
NAT14	0.33115	4.60721	3.69134	0.00614314	0.0627631	-2.4866
ZNF22	-0.435588	6.23624	-3.79886	0.00526758	0.0574324	-2.48678
TMEM102	-0.443756	3.2595	-3.55102	0.00752642	0.069712	-2.49266
BCL6	0.433591	3.04735	3.53969	0.00765167	0.0703088	-2.49724
OFD1	-0.363262	6.27918	-3.79111	0.00532603	0.0577399	-2.50597
TANGO6	-0.521493	3.67912	-3.58611	0.00715186	0.0681447	-2.50939
CKAP2	-1.02672	5.54854	-3.73331	0.00578415	0.0602184	-2.51221
UNC119B	-0.329335	5.92618	-3.76107	0.00555904	0.0590792	-2.51234
ZNF511	0.53613	3.47498	3.55596	0.00747236	0.0696838	-2.51527
NGLY1	-0.493395	5.94347	-3.75618	0.00559805	0.0594098	-2.51601
FCHO1	-0.400521	5.04456	-3.68465	0.00620251	0.0630281	-2.5294
SLBP	-0.490246	5.49146	-3.70485	0.00602505	0.062136	-2.52966
SIKE1	-0.388697	3.66677	-3.56346	0.00739126	0.069222	-2.53235
SF3B1	-0.337057	8.34932	-3.91	0.00450125	0.0536843	-2.53388
PRIM2	-0.591312	5.81756	-3.74175	0.00571467	0.0598722	-2.53546
GCFC2	-0.375618	5.18967	-3.68627	0.0061881	0.0630022	-2.53693
GID4	0.400685	3.4694	3.5452	0.00759044	0.0699206	-2.53702
SVIP	-0.493542	5.42718	-3.69862	0.00607919	0.0624509	-2.53764
RBM42	-0.377932	6.3688	-3.77503	0.00544946	0.0583985	-2.53789
ALPI	0.478409	5.7914	3.74074	0.00572293	0.0598722	-2.53917
PCCB	0.395252	5.24538	3.69806	0.00608408	0.0624509	-2.54316
TNS3	-0.490684	6.90551	-3.80869	0.00519445	0.0571617	-2.54551
GNG7	0.645434	6.40982	3.7827	0.00539017	0.0581184	-2.546
MLLT1	0.327213	4.67569	3.65084	0.00651215	0.0650176	-2.54642
RAD51AP1	-0.364274	4.53557	-3.62724	0.006738	0.0660119	-2.54709
ZNF207	-0.318585	8.42839	-3.89707	0.00458396	0.0541462	-2.55038
TRIM14	1.04488	3.46135	3.51591	0.00792201	0.0722187	-2.55226
SMPD2	0.807854	2.39959	3.44726	0.00876079	0.0778086	-2.55835
CDCA3	-0.733519	4.41444	-3.60529	0.00695564	0.0670053	-2.5585
LUC7L2	-0.248557	9.34569	-3.94319	0.00429629	0.0518751	-2.55851
FSCN1	0.462296	8.0998	3.87668	0.00471764	0.0548473	-2.56022
CDK9	-0.289806	6.30532	-3.75354	0.00561917	0.059536	-2.56463
CSK	-0.340755	6.77124	-3.78538	0.00536964	0.0580055	-2.56516
GTF3C4	0.685301	7.71685	3.84331	0.0049455	0.0561094	-2.57394
FLOT1	0.574723	5.67227	3.70847	0.00599383	0.062017	-2.57692
UBR7	-0.335629	6.87652	-3.78493	0.00537309	0.0580055	-2.5777
TFG	-0.253613	7.25344	-3.81314	0.00516175	0.0571617	-2.57796
FOXJ3	-0.402075	4.41602	-3.59529	0.00705719	0.0675143	-2.58159
PDCD2	-0.50049	3.86533	-3.54493	0.00759348	0.0699206	-2.58183
BAG2	-0.308842	5.79846	-3.70393	0.006033	0.0621448	-2.58262
TPP1	0.46878	6.9774	3.79075	0.00532872	0.0577399	-2.59002
MORF4L2	-0.655825	4.92535	-3.62142	0.00679503	0.066331	-2.59501
KPNA4	-0.403063	7.5309	-3.81472	0.0051502	0.0571617	-2.59991
VPS26C	-0.46574	4.48353	-3.58811	0.0071312	0.0680218	-2.60187
NRM	0.335328	5.85945	3.70503	0.00602349	0.062136	-2.60421
ENDOG	0.752454	2.08913	3.37962	0.00967983	0.0809157	-2.60592
ARCN1	0.314856	7.33022	3.79962	0.00526192	0.0574324	-2.60607
PNP	-0.453176	7.41205	-3.80261	0.00523954	0.0573216	-2.60781
SMC3	-0.307672	7.53227	-3.80846	0.00519617	0.0571617	-2.60809
ZFYVE9	-0.877073	1.28202	-3.22448	0.0121946	0.0916788	-2.60877
CNOT6	-1.30868	4.86406	-3.60391	0.00696955	0.0670053	-2.61058
NFYC	-0.51742	5.14383	-3.63688	0.0066448	0.0657047	-2.61117
HSP90AA4P	-0.587278	3.80712	-3.52454	0.00782275	0.071506	-2.61306
NPC1	0.69994	4.10769	3.54778	0.00756199	0.0697772	-2.61845
PHB	0.233175	9.36644	3.90897	0.00450778	0.0536891	-2.61882
EMC1	0.272358	5.56527	3.66609	0.00637051	0.0641883	-2.61968
GNA14	0.479921	4.29571	3.57556	0.00726233	0.0688978	-2.62195
RPS21	-0.236621	9.36295	-3.89972	0.00456689	0.0540991	-2.62303
SNX29	0.757791	2.7231	3.43545	0.00891431	0.0782382	-2.62398
ATP5PO	0.294898	8.6272	3.86732	0.00478039	0.0549933	-2.62439
ARL6IP4	-0.327056	6.7134	-3.74033	0.00572635	0.0598722	-2.62583
FAM53B	-0.505635	6.70212	-3.73607	0.00576134	0.0600785	-2.63654
XPC	0.380873	3.99404	3.53774	0.00767347	0.0704352	-2.63813
ST13	-0.289715	9.48756	-3.89623	0.0045894	0.0541462	-2.63847
NRXN2.1	-0.486078	2.15515	-3.33732	0.010306	0.0835664	-2.64007
CHEK2	1.27623	6.44287	3.69162	0.00614068	0.0627631	-2.64121
PGK1	-0.418732	10.8212	-3.95015	0.00425463	0.0514841	-2.64362
SMG9	-0.436206	4.90972	-3.6031	0.00697777	0.0670053	-2.64499
GAB1	-0.52809	4.45489	-3.55258	0.00750928	0.069712	-2.6476
SOX15	-6.93954	2.59418	-3.47066	0.00846474	0.0757936	-2.64792
UBASH3B	-0.337466	7.39558	-3.76875	0.00549845	0.0586527	-2.64859
DDX25	-0.295167	4.59985	-3.56742	0.00734884	0.069046	-2.64999
NOC4L	-0.322159	5.06077	-3.603	0.00697877	0.0670053	-2.65104
DNTT	-0.522544	7.11737	-3.74861	0.00565892	0.0596945	-2.65343
DUSP3	-0.446552	4.62117	-3.56492	0.00737562	0.0691974	-2.6536
LSM2	-0.618507	6.26321	-3.68356	0.00621221	0.0630281	-2.65702
FADS2	0.568671	4.34283	3.56213	0.00740555	0.0692818	-2.65952
FBP1	-0.581749	5.93625	-3.66177	0.00641033	0.0645154	-2.66245
NDE1	1.18937	6.02442	3.68829	0.00617012	0.062902	-2.66275
ADI1	-0.590474	7.44789	-3.76732	0.00550968	0.0586851	-2.66949
EGFL7	0.65473	2.44241	3.36348	0.00991389	0.0820635	-2.67093
POLDIP3	-0.265536	7.1275	-3.73983	0.00573041	0.0598722	-2.67113
FNTA	-0.269033	5.67238	-3.63006	0.0067106	0.0658809	-2.67786
BMS1	-0.318334	6.45623	-3.68818	0.00617108	0.062902	-2.67932
UNK	-0.323814	4.98901	-3.57137	0.00730673	0.0689255	-2.68971
COX5B	0.674507	8.47533	3.80494	0.00522226	0.0572239	-2.68979
MDN1	0.543177	6.4455	3.68204	0.00622586	0.0630935	-2.69122
MT-ND6	-1.01954	3.80696	-3.49132	0.0082122	0.0743167	-2.69219
E4F1	-0.60671	5.1415	-3.58441	0.00716953	0.068239	-2.69414
HLA-DRB5	0.345355	8.06991	3.78104	0.00540292	0.0581843	-2.69822
ESPL1	-0.518922	7.06941	-3.71359	0.00594991	0.0617972	-2.70059
PSPH	-0.379751	6.20688	-3.65223	0.00649907	0.0649832	-2.70275
C12orf4	0.595687	2.78343	3.36767	0.00985247	0.0818642	-2.71067
FZR1	4.20067	1.76845	3.36629	0.00987269	0.0819546	-2.71438
VARS1	-0.287224	7.77034	-3.74671	0.0056743	0.0597326	-2.72012
SERPINA10	5.98398	-1.87354	4.1442	0.00325089	0.0459042	-2.73335
PLTP	10.8363	-1.75629	9.63273	1.13952e-05	0.00163754	-2.737
NRP1	1.21353	0.929331	3.07974	0.0151652	0.104183	-2.73718
INO80B	-0.502997	3.53119	-3.41843	0.00914067	0.0791662	-2.73777
NIPSNAP2	0.275757	7.33122	3.71247	0.00595947	0.0618233	-2.73857
RCHY1	0.359307	3.86746	3.43685	0.00889599	0.0782382	-2.74218
ISCA2	0.477773	4.51639	3.50737	0.00802153	0.0729654	-2.74259
VASP	0.319354	5.9849	3.61213	0.00688703	0.0667829	-2.74799
PIK3CG	0.966567	4.58936	3.47504	0.00841048	0.0755056	-2.75014
PRMT1	-0.648605	8.77728	-3.77652	0.0054379	0.0583459	-2.75282
GPAA1	0.325072	4.56423	3.50191	0.00808588	0.0732998	-2.75851
ILKAP	-0.359048	6.42255	-3.6318	0.00669372	0.0658554	-2.76075
CALCRL	8.14166	-2.65449	9.24125	1.54837e-05	0.00201027	-2.76096
TMEM120A	-0.528329	2.59112	-3.31614	0.0106354	0.0851416	-2.76497
ADA	-0.305405	7.65685	-3.71033	0.00597786	0.0619408	-2.76728
IFRD2	-0.650826	3.18507	-3.35854	0.00998669	0.0822972	-2.76844
PALM	0.218034	7.35415	3.69546	0.00610687	0.0626115	-2.76845
ZNF646	-0.465544	4.23783	-3.46806	0.00849717	0.0760063	-2.7687
HPGD	8.78099	-2.4414	9.02545	1.84218e-05	0.00230693	-2.76997
NRGN	1.14665	4.37318	3.46504	0.00853481	0.0760327	-2.7746
BCL10	-0.309077	6.35484	-3.61738	0.00683483	0.0665713	-2.77584
REEP1	9.22601	-2.29303	8.87991	2.07531e-05	0.00246809	-2.77667
PTTG1IP	1.22775	4.6361	3.4865	0.00827038	0.0745099	-2.77721
ZFP91	-0.418668	5.91421	-3.57466	0.00727181	0.0689132	-2.77984
HAUS3	0.343151	6.25653	3.60849	0.00692343	0.0669876	-2.78058
EIF3D	-0.298343	7.06086	-3.65954	0.00643093	0.0645745	-2.78508
EMC2	0.297526	5.71368	3.57158	0.00730448	0.0689255	-2.78525
NPTN	0.379644	5.48462	3.55059	0.00753106	0.069712	-2.78568
PUS1	-0.642077	5.85654	-3.5678	0.00734479	0.069046	-2.79129
DUSP7	-0.66274	3.0131	-3.32328	0.0105232	0.0846293	-2.79386
GATA3	8.62863	-2.49222	8.59305	2.63752e-05	0.00296416	-2.79455
CCT4	-0.209306	9.19516	-3.77866	0.00542128	0.0582389	-2.79716
IMPA1	0.277623	6.34642	3.60618	0.00694662	0.0670053	-2.79718
CELF2	0.228386	7.14111	3.65995	0.00642714	0.0645745	-2.79733
CYB561A3	0.628254	4.606	3.47465	0.00841535	0.0755056	-2.79945
HENMT1	-2.52133	2.94397	-3.26615	0.0114579	0.0884809	-2.79967
LCAT	7.66514	-2.81335	8.52133	2.80333e-05	0.00304595	-2.80247
PRKACB	-0.518446	3.8527	-3.39935	0.0094017	0.0800926	-2.80273
C7	6.25709	-2.13083	4.5742	0.00182661	0.0322174	-2.80834
TCF12	-0.401155	6.14927	-3.57178	0.00730242	0.0689255	-2.80853
ZW10	-0.374421	6.17129	-3.58193	0.00719549	0.0683377	-2.81103
KCNMB1	5.44479	-1.74301	3.61929	0.00681601	0.0664618	-2.81563
DYNLL1	0.310542	9.07226	3.76093	0.00556015	0.0590792	-2.81567
SRPK3	7.61137	-2.83126	8.28548	3.43601e-05	0.00337619	-2.81758
HEXB	0.673469	7.42661	3.65669	0.00645743	0.0647664	-2.8185
TM7SF3	0.546017	3.82003	3.39051	0.00952523	0.0802867	-2.82079
NFKBIB	-0.462185	3.86577	-3.38466	0.00960787	0.0807034	-2.82257
RPP21	-0.495735	3.51884	-3.35838	0.00998907	0.0822972	-2.82306
EXOSC4	-0.301434	5.59794	-3.52549	0.00781186	0.071481	-2.82392
RGS19	-0.385677	5.10623	-3.49109	0.00821502	0.0743167	-2.82433
LIN54	-0.318115	4.18374	-3.41836	0.00914164	0.0791662	-2.82435
SLIRP	0.430815	7.06586	3.63871	0.00662719	0.0657047	-2.82519
MCTP2	-0.759581	1.62206	-3.08971	0.014938	0.10327	-2.82566
LMO4	0.424306	4.15295	3.41572	0.00917725	0.0792589	-2.82612
PRPSAP1	-0.258604	6.24034	-3.56857	0.0073365	0.069046	-2.83111
SMYD5	-0.407259	4.33108	-3.42684	0.00902812	0.078716	-2.8326
STK32B	-3.01398	4.16611	-3.33675	0.0103147	0.0835664	-2.83275
SNRNP48	-0.748465	7.28334	-3.64278	0.00658841	0.0654808	-2.83641
SH3BGRL	0.507891	8.94683	3.74648	0.00567616	0.0597326	-2.83654
SP3	-0.421843	5.40328	-3.50645	0.00803236	0.0729654	-2.83687
L3MBTL3	0.344674	4.23028	3.40945	0.00926248	0.0794471	-2.84302
PLEKHG2	-1.00247	3.01698	-3.28693	0.0111081	0.0869411	-2.85307
ATP6V1B2	-0.45649	7.22652	-3.63334	0.00667882	0.0657826	-2.85595
RPL9	-0.239778	7.68637	-3.64632	0.00655475	0.0652942	-2.86168
STAT3	0.359231	5.66593	3.51561	0.00792544	0.0722187	-2.86424
ETFA	0.261994	8.09341	3.67407	0.0062977	0.063601	-2.86466
FBXO7	-0.401866	4.52945	-3.41774	0.00915001	0.0791662	-2.86592
NDUFB7	0.323811	6.68894	3.58313	0.00718288	0.0682919	-2.86791
APOBR	0.699178	1.91352	3.17967	0.0130428	0.0952701	-2.86797
ZNF2	-0.414273	4.57784	-3.41718	0.00915748	0.0791662	-2.87448
GORASP2	-0.338199	6.89761	-3.59654	0.0070444	0.0674876	-2.87461
ZNF714	-0.370525	6.39099	-3.54786	0.00756114	0.0697772	-2.88056
XRN1	-0.621545	6.58127	-3.56444	0.00738074	0.0691974	-2.88256
PDIA6	-0.210191	9.74497	-3.74883	0.00565712	0.0596945	-2.88289
FKBP8	0.546189	7.04728	3.59839	0.00702554	0.0673807	-2.88346
SBF2	0.798316	3.50101	3.30538	0.010807	0.0856549	-2.89366
TAF1	0.637316	5.07817	3.43495	0.00892091	0.0782382	-2.89752
HBEGF	5.67096	-1.20957	3.53345	0.00772164	0.0708032	-2.90064
AGR2;AGR3	7.09245	-3.00429	7.23226	9.06282e-05	0.00579888	-2.90265
PDCD4	-0.459384	6.00233	-3.50654	0.00803126	0.0729654	-2.90344
HDAC4	1.77111	5.95153	3.47993	0.0083504	0.0750765	-2.90733
FAM111A	-0.49553	5.00335	-3.42913	0.00899773	0.0786382	-2.90765
RNF126	-0.310004	6.30283	-3.52565	0.00781004	0.071481	-2.91033
XPR1	1.39447	3.95934	3.32391	0.0105133	0.0846275	-2.91291
BPNT2	0.416167	5.1815	3.45008	0.00872457	0.0775655	-2.91416
RWDD2B	0.651468	2.85848	3.23753	0.0119588	0.0909197	-2.91603
VPS13C	-0.53286	6.64621	-3.55344	0.00749988	0.069712	-2.91607
SCAND1	-8.38358	1.20515	-3.05846	0.0156619	0.106374	-2.92049
PKNOX1	-0.641303	2.94329	-3.23043	0.0120864	0.0911771	-2.92125
ACOX3	0.348147	3.8802	3.3396	0.0102711	0.0835664	-2.92573
AK4	-0.35748	4.35281	-3.36171	0.00993986	0.082139	-2.9281
TNPO1	-0.337539	8.2098	-3.63504	0.00666251	0.065717	-2.93006
DUS3L	-0.286464	5.46081	-3.441	0.0088418	0.0780894	-2.93789
ZNF280C	-0.41412	4.61345	-3.37851	0.00969569	0.0809451	-2.94085
GUSB	-1.02345	4.29418	-3.33755	0.0103024	0.0835664	-2.94345
ZNF493	0.872774	2.04036	3.11775	0.0143182	0.099931	-2.94493
SENP2	1.6145	2.97398	3.18796	0.0128813	0.0944473	-2.94563
FEZ2	-3.17368	-0.0439978	-2.93374	0.0189373	0.119125	-2.94783
DNAJB6	-0.476055	5.38343	-3.43393	0.00893431	0.0782399	-2.94788
PKMYT1	-0.490575	4.99696	-3.40045	0.00938637	0.0800398	-2.94904
PECR	-1.01892	5.26007	-3.44128	0.00883812	0.0780894	-2.95266
SUMO1	0.381104	8.45084	3.6365	0.00664842	0.0657047	-2.95717
VRK3	-0.251865	4.9888	-3.3942	0.00947346	0.0802867	-2.95868
EPB41L3	6.52754	-3.19236	6.73458	0.000148934	0.00763484	-2.96137
DNAJC11	0.439245	4.86335	3.39502	0.00946197	0.0802867	-2.96259
PMAIP1	8.46234	-2.54765	6.55034	0.000180238	0.00868115	-2.9638
C9	9.47648	-2.20956	6.52817	0.000184474	0.00877689	-2.96408
USP9Y	-6.12398	1.69308	-3.28095	0.0112076	0.0873299	-2.96415
PRKAR1A	-0.306615	7.34183	-3.55961	0.00743281	0.0693887	-2.96611
FAHD2A	0.285491	6.32443	3.4898	0.00823052	0.0743802	-2.96788
ADARB1	6.17735	-3.3094	6.75696	0.000145559	0.00758643	-2.97031
TRAC;TRA	7.43001	-2.89175	6.51538	0.000186965	0.00877689	-2.97193
EXOSC5	-0.354111	5.2277	-3.4021	0.00936357	0.0799365	-2.97243
KHDRBS3	0.301546	5.38283	3.41893	0.00913386	0.0791662	-2.97452
DNLZ	-0.391883	3.73504	-3.27659	0.0112808	0.0876662	-2.97454
OGFR	-0.406469	7.19097	-3.54408	0.00760283	0.0699333	-2.97587
SLC39A11	0.445018	2.26885	3.12757	0.0141074	0.0992097	-2.98089
TCF4	-0.433123	5.713	-3.4263	0.0090352	0.078716	-2.98181
LEMD3	0.527376	6.32359	3.4672	0.00850783	0.0760241	-2.98724
SCRN2	0.264625	5.39718	3.40816	0.0092801	0.0795204	-2.98777
TDRD7	0.656916	4.50157	3.34102	0.0102495	0.0835664	-2.98917
OSER1	-0.77537	1.2201	-2.91762	0.0194099	0.121015	-2.99042
TOMM34	0.371374	5.65638	3.43462	0.00892519	0.0782382	-2.99047
RPA3	-0.358349	7.6542	-3.56065	0.00742157	0.0693577	-2.99106
NAP1L4	-0.222311	9.76582	-3.67459	0.00629301	0.063601	-2.99322
RPL18A	-0.321989	9.62017	-3.67056	0.00632959	0.0638495	-2.99392
SERPINI1	8.39415	-2.57041	6.28254	0.000239511	0.0101428	-2.9956
OAS1	2.45596	4.32758	3.27053	0.0113832	0.0880712	-2.99966
ATP5F1D	0.326722	9.37039	3.65554	0.00646814	0.0647996	-3.00118
PLEKHF1	-0.524944	3.77783	-3.25862	0.0115874	0.0889499	-3.00126
OSCP1	-0.557506	1.90529	-3.04457	0.0159956	0.108068	-3.00598
FAM122A	0.763003	2.45958	3.09573	0.0148025	0.102495	-3.00811
KAT7	-0.399459	5.68003	-3.41037	0.00924994	0.0794471	-3.00983
GLYR1	0.417371	6.29914	3.46545	0.00852973	0.0760327	-3.01057
RAG1	-0.491887	3.45306	-3.21936	0.0122886	0.0921487	-3.01152
CCDC28A	-0.530128	3.14601	-3.19148	0.0128135	0.0943183	-3.01184
NRXN1	6.45143	-3.21776	6.28727	0.000238293	0.0101402	-3.01391
MZB1	0.527712	8.03634	3.57083	0.00731243	0.0689255	-3.01456
PCMTD1	-0.639392	3.51251	-3.2269	0.0121505	0.0914259	-3.0181
STAU1	0.262759	5.34441	3.38441	0.00961149	0.0807034	-3.02066
HGFAC	-1.00068	2.71075	-3.15149	0.0136078	0.0969752	-3.02359
NOSIP	0.247157	6.15794	3.44001	0.00885476	0.0780894	-3.02616
SSBP4	0.814023	3.49998	3.23152	0.0120667	0.0911771	-3.03057
EXOSC8	-0.2528	5.64643	-3.39391	0.00947751	0.0802867	-3.03117
HMGN1	-0.465388	8.91994	-3.60523	0.00695625	0.0670053	-3.03324
CLGN	-0.308599	5.38359	-3.3794	0.00968293	0.0809157	-3.03386
PI16	7.67799	-2.80911	5.99683	0.000327487	0.012591	-3.03508
TRAF3IP3	-0.30548	4.29135	-3.29044	0.0110502	0.0866425	-3.03843
SFT2D2	-0.352896	5.47702	-3.37291	0.00977643	0.081464	-3.03964
SPTLC2	0.865618	4.72378	3.32566	0.010486	0.084563	-3.04253
SUOX	-1.2976	3.78003	-3.215	0.0123692	0.0925946	-3.05282
GZMA	6.88557	-3.07344	5.90849	0.000361489	0.0132586	-3.05427
CCT7	-0.274612	9.81817	-3.64019	0.00661303	0.065651	-3.05663
DCTD	-0.422259	4.7095	-3.31292	0.0106865	0.0852393	-3.0572
CREG1	0.444399	4.59245	3.30738	0.0107749	0.0855552	-3.05931
WDR89	-0.268089	4.69417	-3.30929	0.0107443	0.0854545	-3.05997
SUCLA2	0.564112	5.98778	3.4063	0.00930571	0.0795843	-3.06876
TGFBR3	5.77242	-3.44405	6.02995	0.000315659	0.0122981	-3.07174
DDX20	0.631953	6.53624	3.44163	0.00883361	0.0780894	-3.07345
NEK6	-0.618362	5.11141	-3.33465	0.0103469	0.0837496	-3.07503
MGST3	1.32234	4.96411	3.31531	0.0106485	0.085169	-3.08081
CDC42SE2	-0.840271	4.63266	-3.284	0.0111567	0.0870104	-3.08217
TDG	0.468489	3.27415	3.18008	0.0130348	0.0952701	-3.08221
POFUT2	0.561295	5.77505	3.36842	0.00984158	0.0818536	-3.08379
GATD1	0.425469	4.76471	3.30424	0.0108253	0.0857224	-3.08511
TYW3	-0.339889	4.13168	-3.2467	0.0117958	0.0899928	-3.08555
ZNF585B	-0.353943	5.68123	-3.36458	0.00989775	0.0820073	-3.08693
RPS19BP1	-2.13809	5.56429	-3.35042	0.0101076	0.0829615	-3.08777
RP2	0.297089	6.07534	3.38291	0.00963277	0.080761	-3.08933
PID1	0.550898	1.98161	3.03395	0.0162555	0.108862	-3.09076
DCAF16	-0.354859	4.52516	-3.26807	0.0114251	0.0883175	-3.09089
PLPP1	5.74785	-3.4522	5.88932	0.000369371	0.0132701	-3.09165
CAND1	-0.231842	8.59596	-3.55378	0.00749616	0.069712	-3.0944
UNC93B1	-0.449739	5.49209	-3.34347	0.0102123	0.0834306	-3.09524
ABHD6	0.51386	1.52263	2.95393	0.0183621	0.116692	-3.09526
ETHE1	0.255901	6.38846	3.41363	0.00920561	0.0793475	-3.09634
DESI2	6.15025	-3.31861	5.72037	0.000447616	0.0149194	-3.09929
UBE2T	0.504374	6.38581	3.41144	0.00923535	0.0794471	-3.09985
BEND5	-0.452086	3.9154	-3.198	0.0126886	0.093889	-3.10812
NAGA	0.377129	5.07399	3.30942	0.0107423	0.0854545	-3.1111
JUN	-8.04279	-0.0198386	-5.47628	0.00059475	0.0173608	-3.11162
TTC9	-0.439662	3.70876	-3.18772	0.012886	0.0944473	-3.11231
KRIT1	-0.313901	5.26963	-3.31691	0.0106232	0.0851372	-3.11345
C1orf109	0.539811	3.36818	3.1522	0.0135932	0.0969752	-3.11631
FOXO3	-0.436796	4.35256	-3.23616	0.0119832	0.0909479	-3.11739
DIMT1	-0.263772	5.65598	-3.34467	0.0101941	0.0833599	-3.11827
YBX1	-0.617752	10.8533	-3.63481	0.00666466	0.065717	-3.11873
NARF	-0.499859	3.65918	-3.16799	0.0132739	0.0959	-3.12336
LSM4	-0.383711	6.84534	-3.42575	0.00904255	0.078716	-3.12541
SRP19	-0.519369	7.04268	-3.43606	0.00890628	0.0782382	-3.12656
YIF1B	0.464421	3.85053	3.19385	0.0127679	0.0942787	-3.12829
TPMT	0.460684	5.79178	3.33982	0.0102677	0.0835664	-3.13317
METTL2B	-0.310608	4.12824	-3.21426	0.0123829	0.0926181	-3.13446
SLC7A11	0.553535	1.83749	2.97174	0.0178698	0.115347	-3.13958
TIMP2	0.94303	1.75932	2.9424	0.0186882	0.117997	-3.14264
EIF3A	-0.234378	8.10234	-3.48654	0.00826987	0.0745099	-3.14701
GLCE	-0.858306	2.14422	-2.99687	0.0171985	0.112846	-3.14833
ZCCHC8	-0.263842	6.60828	-3.38735	0.00956985	0.0805853	-3.15009
CDC42SE1	-0.467298	2.25642	-3.01212	0.0168039	0.111029	-3.15102
AK5	7.02408	-3.02704	5.27148	0.000759612	0.0199963	-3.1523
RUNX2	9.09203	-2.33781	5.18627	0.000842446	0.0212127	-3.15926
SH2D2A	4.86618	-2.79888	4.00261	0.00395397	0.0494821	-3.15927
S100A1	-0.727709	3.73319	-3.17877	0.0130605	0.0952701	-3.15943
ARHGAP35	0.314794	5.90398	3.33702	0.0103105	0.0835664	-3.16131
PAPSS1	0.238295	6.72364	3.39573	0.00945209	0.0802867	-3.16704
PCCA	0.240874	5.66702	3.31679	0.0106252	0.0851372	-3.16751
PITHD1	-0.332085	5.74288	-3.30878	0.0107525	0.0854545	-3.16881
MCOLN1	0.622183	2.17385	2.982	0.0175924	0.114323	-3.16925
AFG1L	0.352441	3.89905	3.17422	0.0131502	0.0953963	-3.16951
PRMT6	-0.351207	4.34038	-3.21068	0.0124495	0.0928783	-3.16975
RRM2B	0.349049	4.80984	3.24805	0.0117719	0.0898889	-3.1716
EPRS1	-0.283642	8.02275	-3.46521	0.00853279	0.0760327	-3.17303
MCTS1	-0.303525	7.6243	-3.44006	0.0088541	0.0780894	-3.17422
ALG8	0.371105	3.72786	3.15815	0.013472	0.0965962	-3.17437
KAT6A	-0.848369	7.45853	-3.4323	0.00895574	0.0783493	-3.17484
MKI67	-0.360181	7.7504	-3.44309	0.00881461	0.0780894	-3.17688
LRRC8A	-0.353662	4.2577	-3.19726	0.0127028	0.093889	-3.17846
SUPT16H	-0.244785	8.72964	-3.50439	0.00805654	0.0731094	-3.17904
EIF4EBP2	0.595207	4.54386	3.2135	0.012397	0.0926444	-3.18428
WRAP73	-0.482398	3.90841	-3.16039	0.0134266	0.0964786	-3.18845
CDKN1C	-0.617981	4.04938	-3.15361	0.0135643	0.0969752	-3.1887
KTN1	0.358849	7.72517	3.43853	0.00887406	0.0781809	-3.19052
RAD21	-0.245407	6.56006	-3.35703	0.0100091	0.0823335	-3.19072
RRP9	-0.350597	5.71441	-3.29196	0.0110251	0.0865232	-3.19816
GABPA	-0.304841	6.45685	-3.34753	0.010151	0.0830848	-3.19938
ASPHD2	-0.62922	3.36662	-3.09379	0.0148461	0.102716	-3.20107
RPS19	-0.29021	10.1564	-3.55459	0.00748739	0.069712	-3.20151
CSNK1G1	-0.621086	2.84207	-3.03905	0.0161302	0.108657	-3.20258
RNF113A	-0.547007	5.58477	-3.27582	0.0112937	0.0876889	-3.20259
SF1	-0.281586	8.66842	-3.48119	0.00833502	0.0750151	-3.2039
AGO1	-1.63148	6.85805	-3.34817	0.0101414	0.0830839	-3.20762
ME3	0.63396	5.45209	3.26238	0.0115225	0.0887195	-3.2185
BGN	6.52219	-2.73563	4.95306	0.00112419	0.0250603	-3.21929
EMC4	0.450773	5.44544	3.25483	0.0116532	0.089294	-3.22583
SMAD1	-0.324445	4.70422	-3.2051	0.012554	0.0931826	-3.22653
PPP1R21	0.548192	4.9185	3.21726	0.0123273	0.0923601	-3.22812
GLTP	-0.394392	5.64595	-3.26565	0.0114664	0.0884809	-3.22858
SIAH2	-0.432727	3.07319	-3.05778	0.0156782	0.106374	-3.2298
SPTLC1	0.881533	6.31901	3.33213	0.0103857	0.0839091	-3.23157
ZNHIT3	-0.396141	4.43327	-3.17288	0.0131767	0.0953963	-3.23159
MPV17	0.576645	4.34702	3.15184	0.0136005	0.0969752	-3.23319
AIMP1	-0.304898	7.44326	-3.39129	0.00951417	0.0802867	-3.23319
PGK2	0.842827	4.1685	3.13732	0.0139015	0.0981807	-3.23322
TMEM160	0.405449	4.53499	3.18964	0.0128488	0.0944473	-3.23472
SLC66A2	0.324331	4.30891	3.16267	0.0133806	0.0963009	-3.23474
UBE2V2	-0.291435	7.88302	-3.41445	0.00919441	0.079329	-3.23476
SCCPDH	0.318584	7.50709	3.3931	0.00948888	0.0802867	-3.2361
CALCA	6.15937	-3.31538	4.90019	0.00120148	0.0259381	-3.23918
HECTD1	-0.497131	7.09427	-3.36158	0.00994176	0.082139	-3.24128
IGFBP4	0.958988	0.727595	2.70177	0.0270563	0.146224	-3.24206
SIPA1L1	0.696246	4.15858	3.13688	0.0139106	0.0981807	-3.24333
ZNF160	-0.527559	1.845	-2.86258	0.0211178	0.127469	-3.24544
GTSE1	-0.346887	5.98204	-3.27912	0.0112382	0.0874126	-3.2464
CDCP1	2.3125	3.64627	3.06385	0.0155346	0.105892	-3.24674
SLIT2	5.16593	-1.50623	3.19282	0.0127877	0.0942787	-3.25099
DNTTIP2	-0.479567	5.85549	-3.26295	0.0115128	0.0887195	-3.25179
BSG	0.227801	7.6785	3.39127	0.00951451	0.0802867	-3.25633
FBXW11	0.683703	3.52222	3.07563	0.0152598	0.104522	-3.2594
CLEC16A	-0.626998	4.39998	-3.14625	0.0137155	0.0974314	-3.26213
RBP4	1.12638	2.1958	2.92399	0.0192216	0.120355	-3.26425
L2HGDH	-0.281851	5.11454	-3.20758	0.0125074	0.0931381	-3.26486
NDUFA8	-0.242988	7.21544	-3.36006	0.00996412	0.0822462	-3.26741
ADAT2	-0.56026	3.19555	-3.03343	0.0162685	0.108862	-3.26993
FZD1	7.72683	-2.79295	4.64884	0.00165728	0.0305876	-3.27043
ATP5F1C	0.254273	8.59731	3.44033	0.00885059	0.0780894	-3.27386
SLC39A3	0.576554	2.64022	2.98149	0.0176062	0.114323	-3.27485
SIRPA	-0.545178	4.24228	-3.13861	0.0138744	0.0981619	-3.27592
PDCL3	-0.446159	5.42449	-3.22115	0.0122555	0.0919795	-3.27674
ASXL2	0.940823	3.48496	3.0801	0.015157	0.104183	-3.27978
FAM43A	-4.3456	-0.548655	-3.30173	0.0108659	0.0857267	-3.28291
GOLGA3	0.858336	6.50845	3.27128	0.0113704	0.0880504	-3.28304
MUL1	0.49098	2.73725	2.96911	0.0179417	0.11539	-3.28465
B4GALT4	2.90277	-2.35544	2.87182	0.0208207	0.126133	-3.28576
DZIP3	1.50709	1.17022	2.67082	0.0283837	0.15128	-3.28603
HJURP	-0.384138	6.35321	-3.28004	0.0112229	0.087371	-3.28881
CRIP2	3.87008	0.0158937	2.63476	0.0300151	0.155854	-3.28958
DCLK1	4.14499	-2.42438	3.09879	0.0147343	0.102184	-3.29097
NRP2	-4.98365	-0.556471	-3.48718	0.00826221	0.0745099	-3.29196
LILRB1	-0.91598	3.14439	-3.01176	0.0168133	0.111029	-3.29312
TKFC	0.260819	5.68867	3.23527	0.0119992	0.090973	-3.29556
SNW1	-0.397056	6.94	-3.3138	0.0106724	0.0852046	-3.29658
NSMCE4A	-0.341974	5.01296	-3.17615	0.0131119	0.0953963	-3.30665
TM7SF2	0.683485	3.08864	3.01182	0.0168117	0.111029	-3.30798
CDCA8	0.432829	5.37076	3.2053	0.0125504	0.0931826	-3.30843
ZNF277	-0.601237	2.45135	-2.91912	0.0193653	0.120959	-3.30894
ZNF706	0.508457	6.11691	3.24899	0.0117555	0.0898889	-3.31058
SLC2A1	-0.607794	5.62252	-3.20712	0.0125162	0.0931381	-3.3108
SLC9A9	2.90897	-2.09939	2.73597	0.0256634	0.142516	-3.31218
ZNF611	-0.618596	2.90057	-2.97128	0.0178824	0.115347	-3.31306
COPA	0.594172	8.57834	3.40198	0.00936514	0.0799365	-3.31338
ANTKMT	7.72615	-2.79307	4.4521	0.0021455	0.0361682	-3.31546
MADD	0.441051	5.07781	3.17487	0.0131372	0.0953963	-3.31615
EPHA7	0.35702	5.03441	3.16593	0.0133151	0.0959408	-3.31667
LRPPRC	0.275036	7.79671	3.36546	0.00988474	0.081977	-3.31832
GABPB1	-0.251422	6.06019	-3.2383	0.011945	0.0909197	-3.323
GSTM2	0.342662	5.87317	3.22987	0.0120966	0.0911771	-3.3252
SLFN13	-0.853137	6.16383	-3.26208	0.0115277	0.0887195	-3.3254
DEF6	1.23333	6.80341	3.28525	0.011136	0.0870034	-3.32837
HSP90AB2P	6.09576	-0.543223	2.84907	0.0215607	0.12898	-3.3292
STK26	0.237637	6.92004	3.29558	0.0109659	0.086213	-3.33
CHMP1B	0.350581	5.68605	3.20114	0.0126289	0.0936587	-3.33344
OTULIN	0.292854	5.25538	3.17862	0.0130635	0.0952701	-3.33375
ZDHHC6	-0.423135	2.74462	-2.94444	0.01863	0.117744	-3.33419
ADPRM	-0.746759	1.28133	-2.7037	0.026976	0.146083	-3.33469
EEF1G	-0.206941	10.2173	-3.47304	0.0084352	0.0756063	-3.33555
ADSL	-0.305402	7.72577	-3.33882	0.010283	0.0835664	-3.33846
MYO18A	-0.253353	7.95616	-3.35163	0.0100894	0.0828904	-3.33895
SIN3A	-0.281905	5.31045	-3.17312	0.0131719	0.0953963	-3.33898
SUN2	0.504836	6.36971	3.25859	0.011588	0.0889499	-3.34155
PPA1	-0.244185	8.45143	-3.37769	0.00970752	0.0809668	-3.34413
HNRNPAB	-0.449233	8.80113	-3.39797	0.00942087	0.080178	-3.34448
TP63	3.35498	-1.22937	2.63187	0.0301499	0.155854	-3.34486
APOM	-1.50204	5.84512	-3.33114	0.0104009	0.0839545	-3.34542
GART	-0.336279	7.16256	-3.30058	0.0108845	0.0857267	-3.34635
LHFPL2	4.30822	-0.52101	3.08053	0.0151469	0.104183	-3.34725
GEMIN4	0.679672	6.98137	3.28569	0.0111287	0.0870034	-3.34858
H3C15	2.10219	5.61382	3.19851	0.0126788	0.093889	-3.34963
MAPK3	-0.274152	6.47387	-3.24857	0.0117629	0.0898889	-3.35119
F10	7.64653	-2.81976	4.30301	0.00261912	0.0404212	-3.35206
USP26	-0.767461	2.50593	-2.89901	0.0199707	0.122679	-3.35328
HSH2D	0.566307	2.84609	2.95787	0.018252	0.116362	-3.35421
INSR	-0.257781	6.40841	-3.23938	0.0119256	0.0909045	-3.35422
GOLT1B	-0.978226	3.79466	-3.02851	0.0163906	0.109014	-3.35646
RASAL1	1.94516	5.56707	3.15919	0.0134508	0.096568	-3.35788
MYO1G	0.231819	7.22081	3.30299	0.0108455	0.0857267	-3.35953
PMF1	-0.388433	5.33138	-3.15522	0.0135316	0.0968308	-3.36361
ERLIN2	0.389229	6.30226	3.23017	0.0120911	0.0911771	-3.36398
SF3B4	-0.337385	6.92626	-3.27254	0.0113491	0.0879633	-3.36788
TRIM11	0.384449	4.77625	3.11799	0.0143129	0.099931	-3.36984
SRGAP2	-0.418663	4.9067	-3.12353	0.0141937	0.0994766	-3.36995
TMEM126B	0.430939	3.05709	2.96131	0.0181565	0.116178	-3.37061
DDT	-0.394113	8.46793	-3.35681	0.0100123	0.0823335	-3.37338
UNC45A	0.804204	6.16548	3.21218	0.0124214	0.0927482	-3.37519
CCDC127	0.77983	5.20851	3.13694	0.0139094	0.0981807	-3.37737
NKIRAS2	-0.548846	7.43453	-3.29404	0.010991	0.0863324	-3.37759
SDC2	8.06031	-2.68148	4.18422	0.00307751	0.0443709	-3.38127
NDUFA9	-0.296152	6.83334	-3.25673	0.0116201	0.0891182	-3.38322
RPS2	-0.178429	9.74073	-3.41942	0.00912727	0.0791662	-3.38332
PTP4A1	-0.405283	3.58601	-2.99499	0.0172477	0.112999	-3.38405
CCDC115	0.460713	3.7756	3.03026	0.016347	0.109014	-3.38416
IDH1	0.255375	7.38561	3.29835	0.0109208	0.0859349	-3.38461
TIMM21	0.477633	4.8344	3.10915	0.0145053	0.100915	-3.38567
REEP2	1.13738	-0.397854	2.61418	0.0309886	0.158487	-3.38959
SMC1A	-0.667299	7.79477	-3.31463	0.0106593	0.0851775	-3.39087
SRP72	-0.216279	7.6838	-3.30284	0.0108479	0.0857267	-3.39099
NUF2	-0.354169	5.05123	-3.12584	0.0141442	0.0993497	-3.3911
DISC1	0.71642	1.31617	2.64182	0.0296884	0.15502	-3.39252
ZC3HAV1L	-0.26115	5.27122	-3.129	0.0140771	0.0991165	-3.39588
IFNGR1	0.396477	3.9871	3.036	0.0162051	0.10877	-3.39811
PARK7	0.369723	8.08273	3.32202	0.0105429	0.0846326	-3.39848
ADGRE2	1.32275	-1.32972	2.5423	0.0346498	0.168838	-3.39947
CCT3	-0.169527	9.76521	-3.41066	0.00924595	0.0794471	-3.40017
E2F2	-3.11528	0.304222	-2.58274	0.032539	0.162941	-3.40193
PPP1R35	-0.382221	3.30723	-2.95553	0.0183173	0.116608	-3.40208
MED13L	-0.290137	5.89615	-3.1729	0.0131762	0.0953963	-3.40467
PPP1CA	-0.306286	8.5962	-3.3482	0.0101409	0.0830839	-3.4078
TPX2	-0.324499	5.7691	-3.1555	0.0135258	0.0968308	-3.40797
FOXK2	0.264413	5.74213	3.16678	0.0132981	0.0959408	-3.4092
DHRSX	0.573743	2.94084	2.91968	0.0193487	0.120959	-3.41043
SLC12A6	0.43599	2.84265	2.91762	0.0194097	0.121015	-3.41173
RDX	-0.154935	9.88513	-3.40961	0.00926039	0.0794471	-3.41206
IDH2	0.2461	9.30943	3.38263	0.00963678	0.080761	-3.41538
NOP53	-0.270508	5.65878	-3.14758	0.0136881	0.0973152	-3.41651
UHRF2	-0.213428	8.15009	-3.31169	0.0107061	0.0853175	-3.41712
FMOD	8.93703	-2.38953	4.03904	0.00375866	0.0485336	-3.41867
TKT	-0.201832	9.96135	-3.40722	0.00929301	0.0795532	-3.41877
CERS5	0.401624	3.44634	2.96846	0.0179595	0.11542	-3.42064
APOC2	6.49632	-0.425386	2.74175	0.0254355	0.141927	-3.42362
CHCHD2	0.358618	8.11043	3.30553	0.0108046	0.0856549	-3.42789
NCK2	0.405408	4.1635	3.02932	0.0163703	0.109014	-3.42842
KIAA2013	0.302444	4.6445	3.07195	0.0153451	0.104926	-3.43787
COQ9	0.286998	5.68391	3.14562	0.0137286	0.0974456	-3.43799
DDB2	0.41784	6.14755	3.1736	0.0131623	0.0953963	-3.43889
MALSU1	0.398655	3.25886	2.9367	0.0188519	0.118803	-3.44044
SNX6	-0.426387	6.61176	-3.20528	0.0125506	0.0931826	-3.44092
ITIH1	6.48653	-2.65065	4.00267	0.00395363	0.0494821	-3.44186
NDUFA12	-0.350903	6.42398	-3.18868	0.0128674	0.0944473	-3.44212
ZC3H14	-0.215545	6.52888	-3.19285	0.012787	0.0942787	-3.44262
MAP4K4	0.430196	5.95075	3.15098	0.0136181	0.0969752	-3.44318
FN1	0.401741	4.04427	3.01606	0.0167036	0.11076	-3.44356
WIPI1	-0.664638	2.10998	-2.80313	0.0231388	0.133972	-3.44536
IRGQ	-0.234355	5.97606	-3.15009	0.0136364	0.0970268	-3.44543
ARL6IP5	0.684998	6.89691	3.23127	0.0120713	0.0911771	-3.44549
RAB33B	-0.313337	3.93415	-2.98532	0.0175038	0.114166	-3.44735
NOP2	-0.228549	8.03815	-3.28831	0.0110853	0.0868397	-3.44738
ATP5F1E;ATP5F1EP2	0.656918	7.18914	3.23482	0.0120073	0.090973	-3.45229
PAK1	-0.287995	5.08355	-3.0853	0.015038	0.103879	-3.45284
NDUFC2	0.462333	6.5599	3.19142	0.0128146	0.0943183	-3.45414
GLRX5	0.405311	6.28325	3.17277	0.0131788	0.0953963	-3.45523
ZNF34	-3.75159	-1.21032	-3.18783	0.0128838	0.0944473	-3.45548
UBE2J2	0.419848	2.42218	2.83745	0.0219488	0.130266	-3.4589
RAD18	-0.38842	5.10088	-3.07916	0.0151785	0.104193	-3.45892
P2RX4	0.88934	1.79308	2.76943	0.024372	0.138821	-3.4621
FOSL2	4.59193	-2.31497	2.82965	0.0222135	0.13095	-3.46238
S100A14	5.73529	1.51016	2.59517	0.031917	0.161219	-3.46679
ZER1	1.29174	5.90503	3.12355	0.0141932	0.0994766	-3.46741
EYA3	-0.351206	4.61139	-3.04104	0.0160815	0.108522	-3.46928
FAM219B	4.96817	0.317369	2.79702	0.0233573	0.134653	-3.46956
FLI1	-0.384865	5.9614	-3.12731	0.014113	0.0992097	-3.46976
PTER	-0.308703	4.86192	-3.04905	0.0158872	0.107459	-3.47249
TNIP1	-0.321447	3.31472	-2.90483	0.0197934	0.122362	-3.47586
RBM18	-0.369711	2.52161	-2.81837	0.0226024	0.132194	-3.47785
RBM15B	-0.512258	4.98151	-3.05661	0.015706	0.10648	-3.47808
AP2S1	0.501355	4.9409	3.06071	0.0156086	0.106313	-3.47942
AKR7L	2.93028	-1.44367	2.47115	0.0387067	0.179377	-3.47985
ATP5F1B	0.292519	10.3604	3.3861	0.00958749	0.0806563	-3.48047
C22orf39	-5.15729	0.090468	-2.90309	0.0198463	0.12238	-3.48112
GNG5	0.458762	7.42366	3.23778	0.0119542	0.0909197	-3.48375
FGB	0.730164	2.26258	2.8092	0.0229234	0.133431	-3.48384
ENOPH1	-0.434777	6.12365	-3.13488	0.0139527	0.0983841	-3.4841
NSL1	-0.489011	3.97784	-2.96983	0.017922	0.115385	-3.48686
CDV3	-0.426473	7.6365	-3.23299	0.0120402	0.0911438	-3.48948
IST1	0.266794	6.41608	3.16035	0.0134273	0.0964786	-3.49192
COG4	-0.472845	6.30517	-3.14271	0.0137889	0.0977148	-3.49734
GAS1	-0.663264	1.79824	-2.67873	0.0280386	0.150035	-3.49769
JMJD8	7.09801	-2.28558	3.77912	0.00541775	0.0582389	-3.49896
BPHL	0.341168	3.22456	2.8942	0.0201184	0.123413	-3.4991
ATE1	-0.369184	4.03288	-2.96289	0.0181126	0.116178	-3.4998
KIF16B	0.346541	5.69788	3.09982	0.0147114	0.102106	-3.50027
CENPO	-0.309323	4.0838	-2.96385	0.0180862	0.116149	-3.50105
ANAPC7	0.53786	4.43408	3.00379	0.0170182	0.112055	-3.50177
C9orf40	-0.613692	4.1507	-2.95981	0.0181981	0.116307	-3.50263
GABARAPL2	-0.262373	6.12023	-3.12341	0.0141964	0.0994766	-3.50517
DCTN4	0.321594	6.63074	3.1657	0.0133196	0.0959408	-3.50647
BDP1	1.7158	5.27952	3.0657	0.015491	0.105759	-3.51788
RTN4RL2	-0.414264	3.43249	-2.88432	0.0204252	0.124859	-3.52057
SFT2D1	-6.39684	-0.923759	-3.73576	0.00576386	0.0600785	-3.5211
THAP4	0.284582	5.14931	3.04431	0.0160019	0.108068	-3.522
UBALD2	-0.2904	3.67352	-2.90775	0.0197051	0.122068	-3.52205
ETS1	1.66874	5.77763	3.0584	0.0156635	0.106374	-3.52443
TALDO1	0.278099	7.93108	3.23635	0.0119798	0.0909479	-3.528
NFKBIA	-1.11284	4.36232	-2.96129	0.0181569	0.116178	-3.52834
DAZAP1	-0.302064	8.73687	-3.27402	0.0113241	0.087847	-3.52845
ACADM	0.47925	7.81425	3.22303	0.0122212	0.0918	-3.53037
IDH3A	-0.244888	6.95181	-3.16763	0.0132812	0.0959	-3.53169
TRPT1	-0.301441	4.32446	-2.97134	0.0178808	0.115347	-3.53278
FAM133B	-0.384117	5.07717	-3.02601	0.0164528	0.109344	-3.5356
CEP192	-0.409873	4.30398	-2.96962	0.0179277	0.115385	-3.5362
TAF13	-0.477097	2.54791	-2.79217	0.0235326	0.135347	-3.53754
RGPD8	-6.3183	-2.59809	-3.68383	0.00620981	0.0630281	-3.53842
LAPTM4A	6.48842	-0.0784326	2.51648	0.0360694	0.172684	-3.54065
ZFHX3	0.692644	1.80881	2.66115	0.0288121	0.152516	-3.54203
TBC1D14	-0.734427	1.88324	-2.6826	0.0278711	0.14943	-3.54523
ZNF764	-0.708903	2.00975	-2.707	0.0268385	0.145955	-3.54625
KRT18	-7.80553	-2.77458	-3.61109	0.00689743	0.0668098	-3.54806
DBP	-2.87604	0.0682769	-2.47074	0.0387316	0.179377	-3.54867
DDX27	-0.223993	6.12029	-3.10261	0.0146494	0.101756	-3.54966
DEGS1	0.366545	3.53613	2.89121	0.0202109	0.123865	-3.55096
GID8	-0.348343	5.56397	-3.05995	0.0156267	0.106354	-3.55407
HINFP	-6.38615	-2.60034	-3.62705	0.00673991	0.0660119	-3.55469
VAPB	-0.404493	6.86396	-3.14116	0.0138213	0.0978657	-3.55486
ING5	-0.454149	5.26826	-3.02902	0.0163779	0.109014	-3.55498
INPP5D	-0.295956	6.04885	-3.07594	0.0152525	0.104522	-3.56047
CPM	4.61107	1.02267	2.4074	0.0427495	0.190128	-3.5606
ZNF90	0.476904	4.72264	2.98588	0.0174887	0.114152	-3.56231
MARCKSL1	0.367505	9.68297	3.30115	0.0108753	0.0857267	-3.56488
AGA	0.689009	3.10569	2.82649	0.0223218	0.131501	-3.56566
ORMDL1	0.569043	2.87486	2.81319	0.0227832	0.132968	-3.56645
MSL3	-0.417932	2.93506	-2.80984	0.0229011	0.133431	-3.5713
PDCD5	-0.276004	8.11562	-3.20936	0.0124742	0.0929839	-3.57332
PNO1	-0.278454	6.3672	-3.09727	0.0147681	0.102337	-3.57364
MXRA7	0.435599	4.81077	2.98803	0.0174315	0.113948	-3.57876
EEF2K	0.492627	3.59129	2.88053	0.0205443	0.125237	-3.57971
SEC22A	0.338387	3.21982	2.84049	0.0218465	0.130057	-3.58108
VPS33A	-0.266841	5.6097	-3.03678	0.016186	0.108758	-3.58468
PSME1	-0.326008	9.99521	-3.30087	0.0108798	0.0857267	-3.5865
MFN1	0.836414	3.7167	2.87665	0.020667	0.125858	-3.58696
TSPAN3	0.456507	3.6566	2.8764	0.0206749	0.125858	-3.58699
ZNF24	-0.389821	5.48586	-3.0305	0.016341	0.109014	-3.58727
LIN52	-0.331913	3.47326	-2.8502	0.0215231	0.12898	-3.58864
KATNB1	-1.16404	5.38857	-3.01057	0.0168435	0.111029	-3.58877
ZRANB2	-0.344174	7.62729	-3.17029	0.0132281	0.0956746	-3.58883
ANAPC1	0.626261	5.9736	3.06422	0.0155259	0.105892	-3.58893
CMTM3	-0.728058	5.83594	-3.05281	0.0157968	0.107013	-3.58948
GARS1	-0.363359	8.54352	-3.22752	0.0121392	0.0914198	-3.59016
CALR	0.242443	9.62459	3.28438	0.0111504	0.0870104	-3.59084
P3H4	5.65398	-0.72785	2.52372	0.0356658	0.172067	-3.59244
GTPBP10	0.377634	3.20004	2.83612	0.0219939	0.130446	-3.59284
PHLDA3	7.56732	-0.0601815	2.60734	0.0313195	0.159342	-3.59456
APOA4	7.8418	-1.89188	3.45872	0.00861439	0.0766637	-3.59787
CCNE1	1.00471	0.80947	2.4841	0.0379339	0.177538	-3.59792
RNF170	-0.391382	3.87201	-2.90146	0.0198959	0.122541	-3.59949
ZFAND5	0.354886	3.35821	2.83919	0.0218903	0.130147	-3.60323
GPBP1	-0.46164	3.30714	-2.81539	0.022706	0.132606	-3.60332
NIFK	-0.212416	7.20374	-3.13444	0.0139619	0.0983841	-3.60347
ETNK1	0.496002	4.55825	2.95363	0.0183705	0.116692	-3.60395
LRRC47	-0.288183	6.95406	-3.12239	0.0142181	0.0995492	-3.60395
GMFG	-0.263053	9.23639	-3.25011	0.0117357	0.0898473	-3.6059
PDS5B	-0.412227	7.88293	-3.18423	0.0129538	0.0947856	-3.60877
OVCA2	-0.648394	4.28392	-2.91	0.0196376	0.122001	-3.60998
COMP	8.30386	-1.76889	3.41951	0.00912609	0.0791662	-3.6103
GMEB2	-0.333247	4.59148	-2.94136	0.0187179	0.118044	-3.61074
PPP1R14C	-0.481792	2.33087	-2.71496	0.0265101	0.144971	-3.61538
MASP1	6.52579	-0.177538	2.45486	0.0397017	0.181815	-3.6173
MED7	-0.412529	3.18142	-2.8027	0.023154	0.133972	-3.61743
PIK3AP1	-0.206319	7.38565	-3.1443	0.013756	0.0975607	-3.61743
EIF2AK4	-0.499539	4.41472	-2.93161	0.0189988	0.119301	-3.62021
TSPAN4	3.53725	2.52978	2.40351	0.0430094	0.190364	-3.62044
LNX2	-0.46193	2.4745	-2.72723	0.0260124	0.143496	-3.62142
MFAP2	7.4038	-1.7477	3.39106	0.00951742	0.0802867	-3.62215
BCL2L12	8.85872	-1.48447	3.3795	0.00968159	0.0809157	-3.62328
TPRG1L	6.97274	-2.39155	3.39201	0.00950409	0.0802867	-3.62422
KANSL1	1.54662	5.59796	3.01519	0.0167256	0.110821	-3.62492
MAP3K7CL	9.71508	-2.1302	3.3684	0.00984185	0.0818536	-3.62624
POGK	0.761259	4.73282	2.96272	0.0181174	0.116178	-3.62648
ZNF680	-5.10744	-1.4647	-2.64066	0.0297417	0.155086	-3.62896
THAP3	-3.07539	1.41068	-2.35166	0.0466309	0.199496	-3.62957
SS18L1	0.299639	3.48806	2.8306	0.0221811	0.130936	-3.63063
RBL1	-0.539818	3.79461	-2.85199	0.0214639	0.128808	-3.63077
CUL3	-0.332713	6.31534	-3.05788	0.0156759	0.106374	-3.63129
SPAG9	0.349773	5.94431	3.03045	0.0163422	0.109014	-3.63652
EHD2	0.624715	2.77156	2.76992	0.0243533	0.138821	-3.63756
DDX17	-0.344466	9.94926	-3.26114	0.0115438	0.088766	-3.64276
CMTM8	-1.09214	2.03873	-2.63065	0.0302072	0.155854	-3.64502
ALAD	0.255371	5.60427	3.00346	0.0170269	0.112055	-3.64849
PYGB	-0.248041	5.69183	-3.0012	0.0170856	0.112357	-3.64926
MAML2	-6.3088	-2.52216	-3.33954	0.010272	0.0835664	-3.65074
CITED2	0.379276	1.94433	2.66198	0.0287754	0.152414	-3.65472
BIN3	0.369319	3.39443	2.79967	0.0232621	0.134332	-3.65897
AEBP2	0.521574	3.4101	2.80494	0.0230742	0.133864	-3.6595
LYL1	-0.557645	2.72351	-2.72972	0.0259122	0.143354	-3.66008
ARHGEF2	0.219818	6.89042	3.0836	0.0150767	0.103887	-3.66167
MRPL58	-0.353084	5.81754	-3.01049	0.0168456	0.111029	-3.66313
PSMD5	0.407473	6.9728	3.08354	0.0150781	0.103887	-3.66753
MRM3	0.467605	5.93797	3.01137	0.0168231	0.111029	-3.66757
FTO	0.28877	5.86625	3.00009	0.0171145	0.112463	-3.66869
FAM120B	0.941254	6.7273	3.05033	0.0158565	0.107334	-3.66924
DDX39A	-0.32986	8.26343	-3.15791	0.0134767	0.0965962	-3.66948
PRKRIP1	-0.248362	4.44166	-2.89064	0.0202284	0.123865	-3.67134
SULT1A1;SULT1A2	2.9482	-1.69406	2.30584	0.0500854	0.207686	-3.67151
USP30	0.524564	3.16331	2.78051	0.0239589	0.13745	-3.67219
GLS	0.262892	6.29395	3.03874	0.0161378	0.108657	-3.6742
DDRGK1	-0.276136	6.11526	-3.02017	0.0165996	0.110153	-3.67482
RAB3A	0.324346	3.8823	2.83893	0.0218989	0.130147	-3.67625
ALDH1L1	3.6765	-0.405772	2.30683	0.0500078	0.207463	-3.67696
VEZF1	-0.313087	5.47227	-2.95932	0.0182117	0.116307	-3.67991
LAMC1	3.37265	1.74667	2.32274	0.0487826	0.204118	-3.68071
IFI16	-0.331221	7.56104	-3.11037	0.0144787	0.10081	-3.68082
ARPC2	0.234371	7.62371	3.11435	0.0143917	0.100337	-3.68451
DCP2	-0.273287	4.8846	-2.92126	0.019302	0.120772	-3.68718
TMEM44	-6.73342	-0.499819	-2.48572	0.0378384	0.177538	-3.68841
PPIL4	-0.243676	6.3898	-3.02872	0.0163852	0.109014	-3.69011
FGD2	-4.47474	-1.45861	-2.44828	0.0401106	0.182548	-3.69102
TUBGCP5	-0.41625	3.21483	-2.76123	0.0246819	0.14004	-3.69443
TSHZ3	0.567031	0.951063	2.39555	0.0435464	0.191726	-3.69474
U2AF2	-0.265564	8.3652	-3.15248	0.0135875	0.0969752	-3.69903
RPAP3	-0.264903	6.00991	-2.99384	0.017278	0.11311	-3.69959
RNF145	6.60144	-3.16824	3.18517	0.0129354	0.0947301	-3.70075
GNAZ	-2.51065	-0.501765	-2.34457	0.0471492	0.200254	-3.70252
SCARB1	0.34377	4.17231	2.85411	0.0213944	0.128542	-3.70388
MNT	-0.583927	2.19828	-2.61374	0.0310102	0.158505	-3.70858
AP2A1	0.274585	7.1896	3.07466	0.0152823	0.104578	-3.7101
INO80	0.563155	4.30898	2.84374	0.0217379	0.129717	-3.71409
PUS7	-0.280646	5.52649	-2.94976	0.0184792	0.117129	-3.71418
MYO10	1.30865	0.122678	2.37117	0.0452338	0.196102	-3.71985
BRMS1	-0.453857	4.57703	-2.86727	0.0209666	0.126666	-3.72115
PFN3	-1.2487	2.92938	-2.73496	0.0257033	0.142516	-3.72349
PCYT1A	0.297387	5.68138	2.95872	0.0182284	0.116307	-3.72379
PRR11	-0.456841	3.30937	-2.75398	0.0249597	0.140533	-3.72478
MYL4	0.593245	4.50812	2.85187	0.021468	0.128808	-3.72552
OXSM	0.38184	5.00365	2.90917	0.0196625	0.122068	-3.72864
MPHOSPH9	-4.06348	-0.0668362	-2.40193	0.0431153	0.190364	-3.72908
FBXO38	-0.489383	4.73243	-2.88677	0.0203487	0.124478	-3.72951
RRP1	-0.308856	6.50813	-3.01225	0.0168007	0.111029	-3.73005
FAIM	0.777492	4.01462	2.81815	0.02261	0.132194	-3.73007
CDK13	-0.363915	5.25956	-2.91885	0.0193733	0.120959	-3.73189
NAGLU	0.551059	1.86868	2.55038	0.0342171	0.167568	-3.73258
TESMIN	-3.41302	0.862066	-2.24773	0.0548355	0.218395	-3.73311
XIRP1	5.8399	0.940204	2.39098	0.0438578	0.19271	-3.73456
SMCHD1	-0.325576	6.07217	-2.97379	0.0178142	0.115162	-3.73632
PHKA2	1.0604	5.85624	2.94731	0.0185486	0.117398	-3.73731
PRPF39	0.303299	4.5033	2.85745	0.0212849	0.12806	-3.73863
ACOT9	1.15868	6.28835	2.99607	0.0172195	0.112899	-3.74335
EIF2B5	0.436619	6.33328	2.98233	0.0175836	0.114323	-3.74384
ABHD3	3.54296	-0.0977364	2.23726	0.0557374	0.220884	-3.74439
SMARCE1	-0.29846	6.82832	-3.02258	0.0165388	0.109832	-3.74539
HELLS	-0.260888	5.40334	-2.92594	0.0191645	0.120248	-3.74811
TRIM3	0.479377	1.603	2.53769	0.0348989	0.169393	-3.74844
NFATC3	-0.401508	3.68625	-2.76535	0.0245258	0.139584	-3.74904
EMC6	0.909127	4.62635	2.8732	0.0207767	0.126041	-3.75174
RRS1	-0.214069	6.44499	-2.98695	0.0174603	0.114052	-3.75221
ZNF276	0.497582	1.99052	2.57805	0.0327768	0.163529	-3.75645
CUEDC2	-0.293183	4.87953	-2.86958	0.0208924	0.12648	-3.75675
ZNF107	-0.413354	2.44265	-2.62607	0.0304226	0.156505	-3.75712
MAT1A	3.41781	0.0271829	2.22657	0.0566741	0.222783	-3.7577
OGDH	0.23636	7.02086	3.03157	0.0163144	0.109014	-3.75879
ANKRD39	0.70308	1.82236	2.51483	0.0361624	0.172847	-3.75955
EXOSC10	-0.284786	4.76693	-2.86226	0.0211284	0.127469	-3.75981
NET1	-0.57687	3.51066	-2.74568	0.0252814	0.141767	-3.76079
RBM10	-0.199179	6.4693	-2.98307	0.0175639	0.114323	-3.76208
RPS3	-0.201955	9.74506	-3.17737	0.0130881	0.0953699	-3.76235
RGPD1;RGPD2	-1.05481	3.63292	-2.76251	0.0246332	0.140011	-3.76236
PPIP5K1	-0.41405	5.37174	-2.90733	0.019718	0.122068	-3.7637
CES2	0.83303	1.6027	2.45671	0.0395875	0.181403	-3.7651
ZFP1	0.565946	2.32167	2.60797	0.0312889	0.159279	-3.76699
UBE2V1	-0.248699	8.65029	-3.12074	0.0142537	0.0997187	-3.76723
ANKRD11	-0.381097	3.96479	-2.7863	0.0237464	0.13632	-3.76895
DCUN1D1	0.278966	6.0771	2.95865	0.0182301	0.116307	-3.77067
ALDH1A1	3.26456	-0.787564	2.27712	0.0523791	0.213254	-3.77254
GCDH	0.386862	5.93097	2.94209	0.018697	0.117997	-3.77283
NOP16	-0.212967	6.51421	-2.97934	0.0176639	0.114528	-3.77498
RPL13	-0.496204	10.4528	-3.19749	0.0126982	0.093889	-3.77794
BCL2L13	0.247677	5.42044	2.9029	0.0198522	0.12238	-3.77815
SNRK	-0.456033	1.35702	-2.43485	0.0409587	0.185265	-3.77927
SPTBN2	0.775755	2.87815	2.68967	0.0275676	0.14853	-3.78002
F9	8.64684	-1.70541	2.95428	0.0183523	0.116692	-3.7807
STK17A	1.71933	3.1138	2.74059	0.0254809	0.142	-3.78258
SYT1	0.89745	2.44296	2.62753	0.0303534	0.156241	-3.78321
TMEM14C	0.789604	3.42495	2.74197	0.0254269	0.141927	-3.78446
DCK	-0.381109	7.44171	-3.03525	0.0162236	0.108811	-3.7871
XKR4	3.44553	-3.00869	2.53979	0.034785	0.169121	-3.78751
PGBD1	0.799273	2.08869	2.55505	0.0339697	0.166916	-3.78868
IVNS1ABP	-0.349257	4.35598	-2.8094	0.0229165	0.133431	-3.79183
RBM17	-0.236339	6.65504	-2.97542	0.0177697	0.114959	-3.79391
EIF1B	-0.479213	2.56694	-2.61087	0.0311482	0.159024	-3.79635
EPB41L2	-0.199625	7.59944	-3.03657	0.0161909	0.108758	-3.7982
CAB39	-0.30824	5.74783	-2.91394	0.0195194	0.121525	-3.7986
GATC	0.323661	4.02855	2.77417	0.0241944	0.138168	-3.80254
ITGB3BP	-0.512378	3.37582	-2.68849	0.027618	0.148703	-3.80336
NFATC1	0.443607	3.17944	2.69849	0.0271942	0.146869	-3.80443
SLC35E1	0.267761	4.4894	2.81785	0.0226204	0.132194	-3.80651
NOS1AP	-5.26832	-3.02257	-2.97609	0.0177517	0.114927	-3.80669
PRG4	-1.41955	0.379167	-2.4799	0.0381833	0.178142	-3.80765
MTHFS	-0.510814	4.93639	-2.84026	0.0218543	0.130057	-3.80795
UBE2J1	0.208629	5.62532	2.90112	0.0199063	0.122541	-3.81071
ZFAND1	-0.295022	4.29108	-2.77901	0.0240145	0.137589	-3.8127
CHCHD4	-0.339144	5.68241	-2.88298	0.0204672	0.125003	-3.81529
SPA17	-4.67955	-1.49974	-2.35259	0.0465631	0.199468	-3.81581
EIF3I	-0.219181	8.31398	-3.06921	0.0154089	0.10528	-3.81602
GBP2	7.99355	-1.8867	2.8594	0.0212212	0.127764	-3.81931
PRAG1	0.474719	2.48	2.59349	0.0320005	0.161309	-3.81941
LZTFL1	-0.349673	5.80123	-2.90339	0.0198371	0.12238	-3.82184
CBFA2T3	-0.732331	4.89057	-2.82996	0.0222031	0.13095	-3.82294
ENTPD4	3.07638	-0.573416	2.17132	0.0617684	0.234196	-3.82325
AHCYL1	0.476513	6.4433	2.9354	0.0188891	0.118953	-3.8247
CRYBA1	0.34873	0.639936	2.71758	0.026403	0.144746	-3.82489
SLC39A8	0.523629	1.17435	2.33531	0.0478354	0.201793	-3.8256
AKAP8	-0.293108	6.5468	-2.94885	0.0185051	0.117208	-3.82651
GPX4	-0.325674	6.24505	-2.92551	0.0191771	0.120248	-3.82659
EDRF1	0.888759	2.97917	2.64111	0.0297213	0.155082	-3.8272
DNAJC2	-0.334805	5.51977	-2.87587	0.0206916	0.125872	-3.82791
UBTD1	1.04599	-0.244196	2.36083	0.0459687	0.197918	-3.82804
GPD1	4.72777	-2.15047	2.52194	0.0357646	0.172295	-3.82808
RNF40	-0.376748	5.73529	-2.88207	0.0204958	0.125029	-3.82933
TMUB1	-0.328377	5.04445	-2.83556	0.0220128	0.13047	-3.83138
ZHX1-C8orf76;C8orf76	3.0533	1.13466	2.17043	0.0618541	0.23442	-3.83257
MARK3	0.38684	4.82648	2.8197	0.0225561	0.13217	-3.83373
VEZT	0.487708	4.57867	2.79642	0.0233791	0.134653	-3.83512
FHL1	-0.222138	7.09317	-2.98004	0.0176451	0.114491	-3.83874
RPL7	-0.250521	8.82432	-3.08317	0.0150865	0.103887	-3.83935
CABLES2	0.461936	2.04261	2.49585	0.0372468	0.176013	-3.83973
SRP68	-0.238276	7.314	-2.99337	0.0172904	0.11311	-3.84184
ZNF580	-0.369115	2.759	-2.60804	0.0312855	0.159279	-3.8447
ELP1	-0.354431	6.12296	-2.91086	0.0196116	0.121925	-3.84663
PPFIA1	0.649435	5.79482	2.87241	0.0208016	0.126104	-3.84678
TAF1A	0.752408	4.36522	2.77664	0.0241025	0.137733	-3.85077
SWI5	-3.17059	1.24357	-2.15909	0.0629562	0.236687	-3.85256
ERG28	0.475569	4.15376	2.75432	0.0249466	0.140533	-3.85287
HS1BP3	0.304217	5.13521	2.83353	0.0220815	0.130612	-3.85591
MFN2	0.377877	5.05324	2.83155	0.022149	0.130912	-3.85648
TUSC3	-1.11041	2.60261	-2.60254	0.0315539	0.160349	-3.85755
PHIP	-0.455824	6.65345	-2.94455	0.018627	0.117744	-3.85882
GIGYF1	-0.290211	5.07223	-2.82138	0.0224979	0.132069	-3.86018
KLF16	-0.371836	3.74875	-2.68678	0.0276914	0.148922	-3.86415
NUP54	-0.265394	6.22581	-2.90506	0.0197864	0.122362	-3.86518
MED22	0.88748	8.47774	3.03792	0.0161578	0.108702	-3.86678
ZNF598	-0.352348	5.47538	-2.84753	0.0216117	0.129052	-3.86713
DPY19L1	0.366488	3.72046	2.7058	0.0268885	0.146037	-3.86738
MRI1	-0.231707	6.07163	-2.89045	0.0202344	0.123865	-3.86883
ZNF106	-0.400846	6.3564	-2.91169	0.0195866	0.121857	-3.86965
KIAA1328	-2.22308	-1.14786	-2.21119	0.0580488	0.225363	-3.87192
PURB	0.740938	6.30147	2.90794	0.0196996	0.122068	-3.87245
BOLA2	-0.34579	8.37243	-3.03384	0.0162583	0.108862	-3.87245
MXD4	4.76105	-2.49367	2.31532	0.0493498	0.205576	-3.87295
ANKRD44	-0.300999	4.22944	-2.74085	0.0254706	0.142	-3.87333
KPNA6	0.405983	6.31016	2.90303	0.0198481	0.12238	-3.87393
ERF	-0.492694	3.04705	-2.61432	0.0309823	0.158487	-3.87964
RPL11	-0.207972	10.1705	-3.1196	0.0142781	0.0998102	-3.87965
SLC7A6	0.554098	4.11437	2.74829	0.02518	0.141402	-3.87998
E2F6	0.56256	5.12723	2.81851	0.0225973	0.132194	-3.88062
RBIS	0.330627	3.332	2.65049	0.0292923	0.153482	-3.88094
LTO1	-1.32709	1.04524	-2.23634	0.0558174	0.221012	-3.88137
FAM98A	0.213033	5.61736	2.8501	0.0215265	0.12898	-3.88235
CENPI	0.338998	3.41947	2.6582	0.0289443	0.152939	-3.88348
NCOA2	0.439929	5.92537	2.87501	0.0207191	0.125872	-3.88373
ALDOC	-0.367702	9.41522	-3.08472	0.0150512	0.103887	-3.88452
BATF3	-3.73628	-2.09385	-2.26986	0.0529754	0.214442	-3.89014
CHD7	-0.700038	7.65076	-2.97742	0.0177157	0.114779	-3.8909
NUSAP1	-0.263065	6.00733	-2.86806	0.0209409	0.126666	-3.89108
RPL26	-0.199072	10.2439	-3.11401	0.0143992	0.100337	-3.89118
GSPT1	-0.464665	8.48649	-3.0387	0.0161386	0.108657	-3.89119
ZDHHC20	-0.328234	4.16059	-2.72366	0.0261561	0.143732	-3.89183
SNRPD2	-0.193131	9.33291	-3.07553	0.0152622	0.104522	-3.89228
RPL39;RPL39P5	-0.283987	7.4544	-2.96173	0.0181448	0.116178	-3.89383
ELOA	-0.771807	1.31401	-2.29746	0.0507443	0.209526	-3.89472
LRCH4	-0.293883	4.8904	-2.77703	0.0240881	0.137733	-3.89726
RAB23	-0.412591	3.84875	-2.68484	0.0277745	0.149277	-3.90007
ZNF100	1.25121	3.28598	2.63274	0.0301092	0.155854	-3.90217
CCDC22	-0.308699	4.60482	-2.75872	0.0247778	0.140493	-3.90799
FER	0.456754	4.21296	2.72499	0.0261024	0.143732	-3.9083
CEACAM21	-2.76103	0.980211	-2.10747	0.0682205	0.246828	-3.90984
NDRG1	0.537159	3.94472	2.67841	0.0280523	0.150035	-3.90985
LCMT1	-0.358865	6.13679	-2.86731	0.020965	0.126666	-3.91034
HDAC9	2.00063	4.6199	2.70618	0.0268724	0.146037	-3.91083
USP5	-0.291868	7.84096	-2.98191	0.017595	0.114323	-3.91135
MED4	-0.357757	4.13491	-2.70259	0.0270222	0.14622	-3.91151
DUSP19	0.749191	1.67103	2.37168	0.0451977	0.196043	-3.91159
RWDD1	-0.385816	4.33545	-2.71851	0.026365	0.144628	-3.91439
RAB15	0.609652	1.05228	2.256	0.0541329	0.217372	-3.91677
MSANTD4	-2.56242	3.52168	-2.5649	0.0334533	0.164918	-3.9168
MICAL3	-0.426833	5.63022	-2.82545	0.0223576	0.131591	-3.92149
PXN	-0.345307	5.01965	-2.7791	0.0240114	0.137589	-3.92318
TSPYL2	-3.29507	2.08484	-2.16125	0.0627449	0.236061	-3.92348
TPST1	2.5903	-1.57224	2.07856	0.0713551	0.254208	-3.92373
PIK3C2B	0.410467	4.64821	2.7486	0.0251676	0.141402	-3.92458
SGPL1	0.327746	4.68214	2.75394	0.0249612	0.140533	-3.92461
SDK2	-0.665062	1.99672	-2.40964	0.0426001	0.190042	-3.9278
AGRN	2.97225	-0.563395	2.08497	0.0706477	0.252691	-3.92782
LUM	3.23193	-0.0663273	2.15736	0.063126	0.236986	-3.92879
MAP1LC3B2;MAP1LC3B	0.548269	5.48051	2.82063	0.0225238	0.132069	-3.93034
RCBTB2	0.31085	4.69804	2.74369	0.0253594	0.141927	-3.93193
COPS7B	-0.264974	6.80206	-2.89952	0.0199552	0.12267	-3.93208
NLK	2.69674	-1.58054	2.07487	0.071765	0.254991	-3.93226
COLGALT1	0.471935	5.94914	2.84046	0.0218475	0.130057	-3.93244
WDR13	-0.478998	4.18565	-2.70398	0.0269639	0.146083	-3.93362
HLA-DMB	0.312839	5.37543	2.80126	0.0232055	0.134182	-3.93489
PRIM1	-0.341201	5.50761	-2.80729	0.0229908	0.133579	-3.93529
ERAL1	-0.344906	3.53227	-2.63219	0.0301351	0.155854	-3.93711
CEP152	-0.330957	3.3278	-2.60948	0.0312157	0.15914	-3.93717
ADD3	0.405472	5.94688	2.83754	0.0219457	0.130266	-3.93789
ENTPD5	-2.42667	-1.91538	-2.05561	0.073943	0.258241	-3.93793
SCAPER	0.276277	6.51454	2.87497	0.0207202	0.125872	-3.93901
KRT24	-0.26028	5.08328	-2.76206	0.0246504	0.140011	-3.94215
TLR3	-0.771568	2.76173	-2.54862	0.0343106	0.167745	-3.94806
DIAPH1	0.247688	8.15337	2.98467	0.0175212	0.114194	-3.94909
IGLL1	-0.387875	7.68298	-2.95205	0.0184148	0.116889	-3.94968
GALNS	0.727795	3.40701	2.62897	0.0302859	0.156168	-3.95005
CDS2	-0.322472	5.59882	-2.7987	0.0232971	0.134445	-3.95269
ZNF480	-0.657752	1.96241	-2.41675	0.0421306	0.188813	-3.95493
TMEM123	0.336266	4.75225	2.73649	0.0256428	0.142516	-3.95628
SERINC3	1.50521	1.99418	2.34645	0.0470111	0.200145	-3.95668
RRM1	0.219231	7.84279	2.95599	0.0183045	0.116608	-3.95797
CNK3/IPCEF1	1.70034	-0.611349	2.11476	0.0674512	0.246261	-3.95804
DOCK10	-0.316473	7.61119	-2.93299	0.018959	0.119136	-3.96127
SCP2	0.246659	7.17052	2.91543	0.019475	0.121335	-3.96283
MRPS36	0.283823	5.48018	2.77851	0.0240331	0.137606	-3.96436
KRAS	0.606869	3.90944	2.65722	0.0289881	0.153078	-3.96452
HNRNPUL2	-0.372658	8.22154	-2.96973	0.0179246	0.115385	-3.96472
VPS26B	-0.248111	4.92956	-2.74286	0.0253919	0.141927	-3.96562
STAT5B	-0.622225	4.75512	-2.72334	0.0261689	0.143732	-3.96684
GAS7	-0.378845	4.65386	-2.721	0.0262637	0.144163	-3.96688
OPLAH	1.0884	1.79623	2.39378	0.0436667	0.192073	-3.96827
IMMT	0.256173	7.98463	2.95063	0.0184549	0.117059	-3.96868
KAT2B	0.430856	3.849	2.64514	0.0295359	0.15439	-3.96907
APOBEC3F	0.286219	5.12286	2.75646	0.0248642	0.140533	-3.97267
MIIP	-1.47134	0.013855	-2.04394	0.0752939	0.260468	-3.97321
NDUFA3	-0.423953	5.03588	-2.74907	0.0251497	0.141402	-3.97516
SLC38A9	3.13176	-0.622344	2.01541	0.078698	0.266461	-3.97883
AKAP10	0.508917	3.25495	2.57714	0.0328234	0.163576	-3.98314
JPH1	0.414324	4.55777	2.70359	0.0269802	0.146083	-3.98432
ATL2	0.348359	4.64255	2.70871	0.0267675	0.145834	-3.98758
PPP2R1B	0.506757	6.68493	2.86159	0.0211499	0.12751	-3.98827
GAK	-0.266845	6.36124	-2.82517	0.0223672	0.131591	-3.99037
ANAPC11	0.557379	1.30922	2.28178	0.0519998	0.212508	-3.99117
DKK3	7.51155	-1.9657	2.45458	0.0397188	0.181815	-3.99167
PPIA	0.343707	11.5835	3.10283	0.0146444	0.101756	-3.99359
NCBP2AS2	0.416768	3.2474	2.57342	0.0330135	0.164173	-3.9948
RBM23	-0.513213	2.83528	-2.5213	0.0357999	0.172295	-3.99578
GOLPH3L	0.239253	4.61421	2.70189	0.0270515	0.146224	-3.99583
NOL6	-0.287019	5.00702	-2.72842	0.0259644	0.143418	-3.99813
CETN2	0.296042	5.35686	2.75654	0.0248614	0.140533	-3.99902
VPS37B	0.38664	4.87303	2.7156	0.0264838	0.144931	-4.00091
H2BS1	3.28397	1.14895	2.02085	0.0780371	0.265685	-4.00127
RAMAC	-0.368219	4.85434	-2.70696	0.0268399	0.145955	-4.00311
CRLF3	-0.23389	5.18253	-2.73496	0.0257036	0.142516	-4.00563
TLE1	-0.221685	6.01925	-2.7918	0.023546	0.135347	-4.00978
XYLB	0.412371	4.18522	2.65433	0.0291183	0.153278	-4.01155
HPS5	-1.6663	3.54222	-2.56523	0.0334365	0.164918	-4.0116
MCPH1	-0.427922	2.45391	-2.45825	0.0394926	0.181253	-4.0119
PRORP	0.457274	4.19933	2.6468	0.0294602	0.154086	-4.0137
PEX16	-0.232669	4.4335	-2.6636	0.0287033	0.152153	-4.01596
DENND1C	0.398398	5.54277	2.75451	0.0249393	0.140533	-4.01805
RTKN2	-0.487747	2.27407	-2.43083	0.0412164	0.186047	-4.01876
FKBP2	-0.196508	6.74386	-2.84244	0.0217811	0.129886	-4.01943
ATIC	-0.239327	8.1032	-2.92492	0.0191944	0.12027	-4.02023
WDR83	-0.29716	3.26062	-2.54789	0.0343498	0.167754	-4.02459
PLA2G2D	6.02788	-0.34121	2.05268	0.07428	0.258799	-4.02722
SEC61B	0.168267	7.86055	2.90869	0.0196769	0.122068	-4.02822
DYRK1A	-0.407243	5.01896	-2.70955	0.026733	0.145826	-4.02894
TATDN3	0.371589	2.74782	2.49394	0.0373574	0.176307	-4.02995
HTRA1	3.54611	-2.35796	2.23587	0.0558588	0.221065	-4.03227
RAD52	-1.16433	1.06734	-2.19084	0.0599191	0.230015	-4.03464
CASP2	0.301613	5.47464	2.74301	0.0253861	0.141927	-4.03626
CBR1	6.5249	-0.593432	2.11081	0.0678675	0.246534	-4.03664
DENND4B	0.434767	3.74334	2.59981	0.0316878	0.160514	-4.0389
CDKN1B	0.720404	4.03669	2.628	0.0303313	0.156219	-4.03898
ACYP1	-0.401194	6.88333	-2.83382	0.0220718	0.130612	-4.03915
PYGM	-0.30281	6.21502	-2.79058	0.0235903	0.135513	-4.03966
THADA	1.12191	7.38827	2.85991	0.0212046	0.127752	-4.04071
SEMA4D	0.315805	5.13296	2.70747	0.0268188	0.145955	-4.04501
LRRC20	0.344793	4.20023	2.63179	0.0301539	0.155854	-4.04659
TMEM51	-0.608361	2.66434	-2.46152	0.0392921	0.180791	-4.05082
DLST	0.18877	7.9475	2.89708	0.0200298	0.122956	-4.05294
TLNRD1	0.504147	2.74211	2.46174	0.0392781	0.180791	-4.05652
PLAUR	0.362519	3.27153	2.54067	0.0347375	0.169078	-4.05674
PCYOX1L	0.515384	3.20578	2.53776	0.0348951	0.169393	-4.05674
OCRL	-0.586495	2.31963	-2.422	0.0417877	0.188141	-4.06023
PRKRA	-0.203306	6.77563	-2.8213	0.0225008	0.132069	-4.06309
NEK1	-1.79492	2.84198	-2.46673	0.0389741	0.179814	-4.06309
ZNF367	-3.22606	-0.596837	-1.92982	0.0898301	0.286532	-4.06332
DTYMK	-0.207917	6.88436	-2.82082	0.0225174	0.132069	-4.06478
MYG1	-0.343938	7.19466	-2.84869	0.021573	0.12898	-4.06588
POLR3GL	-0.497022	2.68625	-2.47067	0.038736	0.179377	-4.06632
MAP2K5	-0.431968	2.00881	-2.36798	0.0454595	0.196692	-4.06643
SDF2	0.219074	5.81887	2.74728	0.025219	0.14153	-4.06669
ZBTB17	0.560316	2.59473	2.44654	0.0402199	0.182677	-4.0677
RDH10	2.60638	0.647626	1.95654	0.0862012	0.279827	-4.07037
RANBP10	0.232509	4.08489	2.59964	0.0316963	0.160514	-4.07047
MCM9	-3.5774	-0.527188	-1.99852	0.080783	0.269599	-4.07147
APOA2	-3.80284	1.30631	-2.14334	0.064518	0.240257	-4.07325
APRT	-0.357311	7.27491	-2.83447	0.0220497	0.1306	-4.07327
TMEM87B	-0.735464	2.58177	-2.45952	0.0394145	0.180989	-4.07334
ZRANB3	0.798702	0.431812	1.99844	0.0807935	0.269599	-4.07361
B4GALT7	0.458397	1.57802	2.32525	0.048592	0.203515	-4.07452
ZFX	-0.309248	4.388	-2.62487	0.0304792	0.15652	-4.07643
RBM28	-0.231107	6.38944	-2.77786	0.0240573	0.137654	-4.07943
PXMP4	0.469486	2.28989	2.42341	0.0416956	0.18792	-4.08003
TXNDC15	0.418946	1.94817	2.35463	0.0464152	0.199254	-4.08117
YY2	-0.919181	4.42663	-2.60987	0.0311969	0.15914	-4.08159
STAMBP	-0.320444	6.33209	-2.76503	0.0245378	0.139584	-4.0849
VAMP7	0.292342	4.60586	2.6397	0.0297862	0.155143	-4.0862
UHRF1BP1L	0.457597	4.42898	2.63433	0.0300351	0.155854	-4.08874
XRCC6	-0.299967	10.4889	-2.99839	0.0171589	0.11267	-4.08881
NFKB2	-0.565589	5.30673	-2.68812	0.0276338	0.148703	-4.08952
KAT8	-0.298408	5.08789	-2.67621	0.0281482	0.150272	-4.09014
RPAIN	-0.386772	3.66623	-2.54321	0.0346008	0.168787	-4.09142
SLC26A11	7.38393	-2.03738	2.2335	0.0560657	0.221548	-4.09176
APOBEC3C	0.468023	5.72487	2.72953	0.0259202	0.143354	-4.0926
OSTM1	0.391527	4.80441	2.65207	0.0292203	0.153278	-4.09263
ITPRIPL1	-4.00957	-1.70755	-1.93903	0.0885622	0.284149	-4.09431
TGFB1	0.372157	3.9709	2.58559	0.0323952	0.162737	-4.09643
ZNF174	1.13559	2.28407	2.38212	0.0444677	0.194513	-4.09691
TIMM22	-0.3239	3.94523	-2.5646	0.0334691	0.164918	-4.10084
ELAC1	-0.304496	2.39088	-2.40219	0.043098	0.190364	-4.10263
SLC35E2B	2.44463	0.985374	1.9455	0.0876827	0.28283	-4.10279
USPL1	3.29932	-1.1479	1.99121	0.0817027	0.270982	-4.10289
ZNF330	-0.204679	5.91028	-2.72367	0.0261555	0.143732	-4.10546
BCAP31	0.177682	8.24394	2.88266	0.0204773	0.125003	-4.10612
STK25	0.235796	5.72451	2.71368	0.0265628	0.145168	-4.10716
MDC1	-0.393681	5.79848	-2.71204	0.02663	0.145444	-4.11056
TMEM199	0.484359	3.96254	2.55345	0.0340541	0.16705	-4.11271
LAGE3	-0.485472	6.01671	-2.72685	0.0260276	0.143496	-4.11283
LETM1	0.167083	6.85951	2.79389	0.0234702	0.135089	-4.11299
IQSEC2	-0.419256	4.05647	-2.56864	0.0332596	0.164906	-4.11691
CHST7	6.05995	-1.72041	1.90017	0.0940285	0.294587	-4.11797
HNRNPUL1	-0.189182	7.83716	-2.84865	0.0215744	0.12898	-4.11935
RUBCN	1.78475	4.59404	2.58332	0.0325098	0.162941	-4.12058
ADPRS	-0.220604	5.81655	-2.70492	0.0269248	0.146083	-4.12331
MAF1	-0.403298	3.87125	-2.54273	0.0346266	0.168819	-4.12353
ZNF142	0.326358	2.24033	2.35804	0.0461693	0.198587	-4.12354
LIMS1	0.338358	4.99819	2.64821	0.0293958	0.153841	-4.12395
TMPPE	0.615229	3.6287	2.52424	0.0356367	0.172022	-4.1241
MAN1B1	0.509442	4.1019	2.56337	0.0335329	0.16514	-4.12667
CARD19	1.25271	6.50058	2.7425	0.0254061	0.141927	-4.12678
PIK3R2	-0.826513	4.64761	-2.62513	0.030467	0.15652	-4.12698
PLEKHF2	-0.327722	4.15429	-2.56715	0.0333366	0.164918	-4.12841
CORO1B	0.300706	4.1268	2.57761	0.0327992	0.163548	-4.12926
TCP11L1	-0.296445	4.14754	-2.57032	0.0331729	0.164662	-4.13222
AGAP3	-0.308333	5.20609	-2.65283	0.0291859	0.153278	-4.13355
ALKBH4	-0.22913	4.35996	-2.59085	0.0321318	0.161785	-4.1338
CAMK2G	0.435339	5.53999	2.68345	0.0278345	0.149325	-4.13438
AP1G1	-0.629303	6.30965	-2.7525	0.0250169	0.140756	-4.13501
ERCC6L	-0.31173	4.62717	-2.60928	0.0312253	0.15914	-4.13522
ACAP3	-2.81613	1.59346	-1.95521	0.0863775	0.280024	-4.13582
WDR82	0.250306	6.29885	2.73572	0.0256733	0.142516	-4.13769
GPALPP1	-0.419424	6.08815	-2.70871	0.0267678	0.145834	-4.14003
MINDY2	-2.47188	0.698862	-1.89078	0.0953966	0.296436	-4.14104
NEIL2	-0.331531	3.74901	-2.51308	0.036261	0.173007	-4.14266
GSN	0.686945	7.18271	2.80291	0.0231465	0.133972	-4.14267
PLEKHG3	-2.97414	1.17475	-1.90835	0.0928509	0.292459	-4.14368
PEDS1	0.39927	2.82189	2.43787	0.0407669	0.184684	-4.14623
ANKRD16	-0.329044	5.26994	-2.65377	0.0291438	0.153278	-4.14639
SFN	9.03478	-2.35654	2.11092	0.0678558	0.246534	-4.14727
BORCS5	-0.499868	5.44458	-2.66347	0.0287087	0.152153	-4.14867
NOL4L	0.325862	2.5314	2.40278	0.0430585	0.190364	-4.1489
DMAC1	0.216501	4.9585	2.63489	0.0300089	0.155854	-4.1499
EMC3	0.369229	3.61312	2.50977	0.0364483	0.173644	-4.15106
TUT7	0.544153	5.14076	2.63181	0.0301529	0.155854	-4.1553
SMG8	-0.766664	4.38216	-2.57607	0.0328778	0.163754	-4.15584
CMIP	0.513191	3.46161	2.4902	0.0375755	0.176821	-4.15626
DMXL1	0.501157	3.85874	2.51493	0.0361568	0.172847	-4.16032
RPL18	-0.237935	10.0187	-2.93351	0.0189437	0.119125	-4.16134
MVP	7.12484	-1.87735	2.08296	0.0708683	0.252984	-4.16205
LST1	-0.567419	2.94391	-2.41408	0.0423066	0.189281	-4.16216
PANK3	-3.89513	-1.76329	-1.90169	0.0938076	0.294	-4.164
NXF1	-0.232224	6.82886	-2.75426	0.0249491	0.140533	-4.16445
KCTD21	2.90003	-0.629837	1.82637	0.105306	0.311969	-4.16529
PBDC1	-0.197306	6.55298	-2.73066	0.0258747	0.143283	-4.16749
C2CD5	0.269851	4.22607	2.55441	0.0340036	0.166948	-4.16855
GTDC1	0.465476	1.9762	2.30385	0.0502407	0.208185	-4.16909
KIF3B	0.342741	3.10081	2.45123	0.039927	0.182008	-4.16924
PIH1D1	-0.25671	5.8908	-2.67998	0.0279841	0.149853	-4.17029
GPR108	2.65243	0.518701	1.85578	0.100666	0.30492	-4.17147
PER3	0.41349	4.37101	2.56877	0.0332531	0.164906	-4.17181
LMAN1	0.195129	7.64858	2.80675	0.0230099	0.133579	-4.17358
RASSF2	-0.229383	4.84289	-2.59796	0.0317791	0.160655	-4.17391
TMEM63B	1.11007	1.96823	2.2478	0.0548293	0.218395	-4.1798
BCKDK	0.382184	3.962	2.51942	0.0359048	0.172295	-4.18018
COPS2	-0.269105	6.38957	-2.71554	0.0264864	0.144931	-4.18204
NOP58	-0.2004	8.6191	-2.85515	0.0213602	0.128425	-4.18229
EIF3H	-0.515324	7.82759	-2.80858	0.0229454	0.13347	-4.18264
ZBTB10	0.566597	3.48105	2.47903	0.0382351	0.178142	-4.18392
ACTN4	-0.262926	8.53116	-2.84833	0.021585	0.12898	-4.18421
ATP6AP1	0.625451	5.95725	2.67708	0.0281099	0.150251	-4.18594
BCL2	-0.406369	6.73467	-2.7358	0.0256702	0.142516	-4.18638
ZYX	0.365862	7.76851	2.80361	0.0231216	0.133972	-4.18725
SLC26A6	0.927184	1.06684	2.06523	0.0728467	0.256558	-4.18847
HUWE1	-0.303343	6.77495	-2.74018	0.0254971	0.142	-4.18964
CCT5	-0.290817	9.6646	-2.90018	0.0199349	0.122631	-4.19442
ZFP14	0.223284	5.19002	2.61794	0.0308083	0.158026	-4.19487
UBQLN2	-0.322422	5.95818	-2.67157	0.0283509	0.151262	-4.19521
MED16	-0.342236	8.25244	-2.82334	0.02243	0.131872	-4.19672
IQCB1	-0.357978	2.57617	-2.37017	0.0453043	0.196311	-4.19683
HDLBP	0.572319	7.27191	2.7547	0.024932	0.140533	-4.20017
DTX4	-3.63578	-2.3558	-1.95639	0.0862204	0.279827	-4.2018
COX20	-0.241681	4.61274	-2.57059	0.033159	0.164662	-4.20192
ZC3HAV1	-0.226	8.06676	-2.80694	0.0230034	0.133579	-4.2022
RAD51C	-0.538172	4.15229	-2.51942	0.0359048	0.172295	-4.21199
COPB2	0.316305	7.22969	2.75419	0.0249515	0.140533	-4.21216
PTPRJ	-0.481148	3.13383	-2.41719	0.0421022	0.188813	-4.21294
MGAM	4.3798	-0.353898	1.76139	0.116288	0.329628	-4.21738
C17orf80	0.319902	3.87461	2.4757	0.0384336	0.17871	-4.21753
BCL11B	-0.495663	2.27339	-2.30317	0.0502938	0.208185	-4.21786
TBC1D31	-0.363131	1.9672	-2.26194	0.0536335	0.216416	-4.21871
LYAR	-0.410702	6.12614	-2.66575	0.0286077	0.151981	-4.22433
ALAS1	-0.342346	1.59133	-2.17551	0.0613666	0.233278	-4.22707
RSBN1L	-0.253211	3.77213	-2.46898	0.0388379	0.179549	-4.22805
RSPRY1	0.294342	4.21984	2.51816	0.0359756	0.172383	-4.22828
KDM4A	0.26763	3.75135	2.4668	0.0389703	0.179814	-4.23054
PAM	-3.14296	0.984179	-1.78583	0.112037	0.323363	-4.23419
WDR45B	-0.447057	3.15947	-2.40219	0.0430982	0.190364	-4.23573
MAPK13	0.395334	4.57874	2.54085	0.0347277	0.169078	-4.23589
ARID1A	-0.295595	6.38779	-2.66993	0.0284233	0.15128	-4.2404
AGFG1	-0.274411	6.22505	-2.65992	0.0288674	0.152717	-4.24053
AKT2	-0.27977	5.003	-2.57506	0.0329296	0.163919	-4.24075
MRPL47	0.314061	5.27927	2.59417	0.0319662	0.161229	-4.24314
CHEK1	-0.326136	5.54561	-2.61557	0.0309219	0.15833	-4.24377
SPP2	3.11223	0.132146	1.93059	0.0897233	0.286422	-4.24396
ZNF8	-0.659381	4.84459	-2.55216	0.0341226	0.167199	-4.2449
FAM120A	0.204595	5.94989	2.64175	0.0296918	0.15502	-4.24506
CTBP2	-0.243951	6.03852	-2.65173	0.0292359	0.153278	-4.24531
TMBIM1	5.42435	-0.308262	1.73424	0.121186	0.336693	-4.24659
TSN	-0.269895	8.36909	-2.79678	0.0233662	0.134653	-4.24899
GNB1L	0.437132	5.9984	2.63553	0.0299796	0.155854	-4.2493
STK39	-0.239245	7.30894	-2.73223	0.0258121	0.143027	-4.24977
SMCR8	0.367842	2.17414	2.27204	0.0527957	0.213965	-4.25033
MZT2A	0.742957	1.81849	2.16703	0.0621822	0.23491	-4.25136
ZMYM1	-0.683849	5.93082	-2.63148	0.0301684	0.155854	-4.25233
ZCCHC3	-0.269995	5.51577	-2.59811	0.0317715	0.160655	-4.25332
FANCF	0.555852	3.92781	2.4618	0.039275	0.180791	-4.25488
PPIL2	0.303018	4.22092	2.49991	0.0370121	0.175472	-4.25674
BUD31	-0.205335	6.07713	-2.64032	0.0297575	0.155086	-4.25799
ZBED5	-0.620637	1.71526	-2.16856	0.0620343	0.234596	-4.25847
PDF	-0.296118	3.84536	-2.4537	0.0397735	0.181838	-4.25877
SOX1	-0.471311	1.5855	-2.1151	0.0674163	0.246238	-4.25891
RAB3IL1	-0.51126	1.71408	-2.15408	0.0634488	0.237689	-4.25957
NEK7	-0.320422	5.26804	-2.583	0.0325256	0.162941	-4.2598
THBS3	2.86553	-0.112438	1.77333	0.114192	0.326168	-4.26018
TBL2	0.18816	6.21984	2.65186	0.0292299	0.153278	-4.26092
ZNF14	0.48731	0.885508	1.97493	0.0837856	0.275193	-4.26149
HSD17B4	0.470421	8.05446	2.77196	0.0242772	0.138551	-4.2624
MANEAL	3.52455	-0.0543366	1.85203	0.101246	0.305622	-4.26367
KIFAP3	0.374687	2.81996	2.35566	0.046341	0.199033	-4.26456
SPATA2	0.739778	-0.302849	1.74212	0.119745	0.335205	-4.26635
SARM1	0.805161	5.48446	2.56193	0.0336081	0.165325	-4.26889
TRIT1	-0.370075	4.7884	-2.53692	0.0349406	0.169502	-4.26908
HIKESHI	-0.263227	6.00319	-2.63126	0.0301785	0.155854	-4.27069
BAK1	0.351185	4.60738	2.52058	0.03584	0.172295	-4.27261
ALPK1	2.39425	-1.4522	1.69436	0.128733	0.347866	-4.27271
RASSF8	-0.926035	0.602685	-1.9177	0.0915241	0.289639	-4.27398
ANTXR2	1.14099	3.50716	2.41128	0.0424914	0.18975	-4.27412
MIEF1	0.310298	4.09067	2.47949	0.0382072	0.178142	-4.27433
JAM2	0.637726	4.39847	2.49204	0.0374682	0.176584	-4.2758
PLEKHH3	-2.89888	-0.482604	-1.75127	0.118091	0.332863	-4.27627
SMIM11A	0.603846	1.97585	2.22606	0.0567196	0.222861	-4.2784
KEAP1	0.381662	4.49147	2.51287	0.0362729	0.173007	-4.27961
GNPDA1	-0.296919	6.61261	-2.66537	0.0286244	0.151981	-4.28094
CSNK2B	-0.164355	8.71387	-2.8001	0.023247	0.134332	-4.28189
UBXN2A	-2.04701	-0.209373	-1.69381	0.12884	0.347941	-4.28217
BAX	0.461074	6.80661	2.69281	0.0274342	0.147902	-4.28265
LRIG1	2.35142	-1.50326	1.68841	0.129895	0.350142	-4.28391
FAM171A2	0.839627	4.31983	2.49014	0.0375791	0.176821	-4.28531
SNX18	-0.292854	4.74941	-2.51899	0.0359293	0.172295	-4.28607
EPS8L2	-0.784521	1.60652	-2.06794	0.0725414	0.256052	-4.28611
METTL18	0.416006	2.95742	2.32752	0.0484196	0.203089	-4.28617
IPO9	-0.312185	6.70397	-2.66395	0.0286876	0.152153	-4.28814
DDX21	-0.148343	7.96469	-2.74537	0.0252936	0.141767	-4.28869
ANXA1	3.05051	2.11443	1.93366	0.0892996	0.285589	-4.28893
MLF2	-0.306437	3.70031	-2.41976	0.041934	0.188509	-4.28906
GRK6	-0.281796	4.76379	-2.52674	0.0354987	0.171544	-4.28926
CYB561D2	0.338821	3.06559	2.3627	0.045835	0.197634	-4.2894
EIF3F	-0.231765	8.34101	-2.76956	0.0243672	0.138821	-4.28952
RAD51D	-0.359899	2.75888	-2.32134	0.0488888	0.204465	-4.29012
SAC3D1	-0.258728	4.92018	-2.532	0.0352092	0.170521	-4.29025
MAP3K15	-3.7061	-2.00195	-1.74159	0.119842	0.335205	-4.29203
FOXM1	-2.18879	-0.0082272	-1.72287	0.123296	0.339162	-4.29369
SEPTIN8	-0.665711	6.87896	-2.66937	0.0284477	0.151318	-4.29457
N4BP2L1	-0.532236	1.98197	-2.20165	0.0589182	0.227623	-4.29466
NTRK1	0.415346	2.33872	2.27734	0.0523611	0.213254	-4.2947
CHPT1	0.658756	2.53342	2.26829	0.0531055	0.214626	-4.29475
IFITM1	-0.720713	3.24888	-2.38076	0.0445626	0.194579	-4.29484
NEK4	-0.587976	1.02929	-2.00117	0.0804528	0.269172	-4.29526
NR3C2	-2.14627	0.0916464	-1.70394	0.126881	0.345815	-4.29533
SLC5A3	1.09888	2.12449	2.23001	0.0563708	0.222153	-4.29612
LETMD1	0.493957	5.7465	2.5946	0.0319452	0.161219	-4.2979
WAS	-0.240951	6.69345	-2.65434	0.0291178	0.153278	-4.30247
TMED1	0.251964	4.96486	2.52896	0.035376	0.17114	-4.30264
GGA1	-0.37407	4.51969	-2.49282	0.0374227	0.176464	-4.30473
POLR2M	0.813741	6.77751	2.65346	0.0291574	0.153278	-4.30557
MAP2K1	-0.301582	6.2739	-2.62396	0.0305222	0.156649	-4.308
IRF2BP1	-0.296642	5.79141	-2.58655	0.0323469	0.162681	-4.30945
MAP4	0.236963	7.28184	2.6929	0.0274304	0.147902	-4.30983
STX17	-0.264655	4.90458	-2.52022	0.0358604	0.172295	-4.3101
HMGA2	0.979973	1.56624	2.02713	0.0772817	0.26463	-4.31025
YIPF5	0.214208	5.53196	2.56679	0.0333554	0.164918	-4.31049
NLRP1	-0.46557	1.65875	-2.11268	0.0676697	0.246398	-4.31137
SRCAP	0.388043	4.45578	2.47251	0.0386251	0.179337	-4.31305
SEC61A2	-2.57687	1.42965	-1.83747	0.103531	0.308691	-4.31307
TMX1	-0.199647	7.91654	-2.72903	0.02594	0.143373	-4.31459
IRAG1	-0.648035	1.48561	-2.04859	0.0747529	0.259621	-4.31829
MAGT1	0.433377	6.66283	2.65271	0.0291916	0.153278	-4.31978
IKBIP	0.256152	5.16128	2.53781	0.0348924	0.169393	-4.31984
OXR1	-0.629787	2.36552	-2.25417	0.0542872	0.217642	-4.31998
DDX47	-0.175737	5.6855	-2.56828	0.0332785	0.164906	-4.32083
POLE3	-0.424388	7.51458	-2.69813	0.0272091	0.146869	-4.32144
ERN1	2.12634	-0.0510837	1.66215	0.135145	0.358344	-4.323
HMGN5	0.53935	6.26629	2.61695	0.0308562	0.158178	-4.32473
DYM	0.496225	3.08595	2.32751	0.0484208	0.203089	-4.32518
IRAG2	0.373661	7.13999	2.67046	0.0283999	0.15128	-4.32996
CCNY	-0.424639	3.39699	-2.34993	0.0467568	0.19973	-4.33232
LRCH1	-0.509511	5.06067	-2.5079	0.0365546	0.173962	-4.33233
IK	-0.168878	7.35582	-2.684	0.0278106	0.149288	-4.33268
RTL8A	2.27903	-1.6524	1.61737	0.144548	0.372695	-4.33306
ACVR1B	4.04666	-1.12064	1.62143	0.14367	0.371463	-4.33403
NSUN5	-0.189291	5.7517	-2.56766	0.0333103	0.164918	-4.33406
GFUS	-0.186073	6.70757	-2.63838	0.0298474	0.155363	-4.33505
MRPS12	0.310639	5.51398	2.5542	0.0340143	0.166948	-4.33544
QTRT1	-0.190559	6.21617	-2.59969	0.0316935	0.160514	-4.33559
VAPA	-0.272485	7.81256	-2.70989	0.0267189	0.145826	-4.33575
ZSCAN16	-1.28114	6.21008	-2.59459	0.0319458	0.161219	-4.33642
HAUS8	-0.216046	5.06609	-2.5124	0.0362991	0.173028	-4.33652
NEIL1	-1.85481	1.00463	-1.80113	0.109449	0.318429	-4.33693
SNRPB2	-0.183079	8.64791	-2.75646	0.0248645	0.140533	-4.3401
CFAP36	-0.347035	3.70733	-2.3808	0.0445594	0.194579	-4.34138
NRF1	-0.273	4.95259	-2.49636	0.0372169	0.175967	-4.34218
ARPC3	0.18073	8.41824	2.74404	0.0253458	0.141927	-4.34406
CACTIN	0.307632	5.37431	2.52825	0.035415	0.171234	-4.34662
CCDC25	-0.220502	5.72495	-2.56281	0.0335621	0.165191	-4.34786
SNAPC1	-1.06062	3.19727	-2.31909	0.0490605	0.204793	-4.34832
ADNP	0.294714	6.84913	2.63802	0.0298639	0.155363	-4.34974
LPXN	-0.191908	4.64646	-2.4711	0.0387099	0.179377	-4.35045
DDX39B	-0.145852	10.4028	-2.83116	0.0221622	0.130912	-4.35191
SCMH1	-0.278971	2.24339	-2.21898	0.0573489	0.224131	-4.35212
PRR36	1.35266	7.6872	2.70425	0.0269528	0.146083	-4.35271
CHORDC1	0.456044	7.56053	2.68429	0.0277981	0.149288	-4.35407
AKAP11	-0.71788	5.80827	-2.55218	0.0341217	0.167199	-4.35419
LRRFIP1	-0.459497	8.30447	-2.72469	0.0261147	0.143732	-4.3542
OLA1	-0.208201	8.80021	-2.75609	0.0248784	0.140533	-4.35425
PRRC2B	-0.315262	6.14458	-2.58257	0.0325474	0.162941	-4.35467
LAP3	-0.210762	8.1703	-2.71692	0.02643	0.144803	-4.35551
CEP78	-0.531114	3.25284	-2.31383	0.0494651	0.205698	-4.35611
GRAP	-0.27076	5.324	-2.52016	0.0358637	0.172295	-4.35652
HOMER2	0.351599	4.09691	2.41019	0.0425638	0.189977	-4.35677
LLGL1	0.441597	4.32129	2.44937	0.0400426	0.182345	-4.3577
HP	-3.25443	2.23403	-1.90546	0.0932651	0.292928	-4.36116
FKBPL	-0.921237	3.67091	-2.35768	0.0461954	0.198602	-4.36247
MAD1L1	0.219232	6.18627	2.58281	0.0325354	0.162941	-4.36279
WEE1	-0.427098	3.74733	-2.3645	0.0457064	0.19737	-4.36329
ZSWIM8	-0.498798	1.7525	-2.13584	0.0652762	0.241848	-4.36351
CYRIB	-0.305528	7.10328	-2.65248	0.0292021	0.153278	-4.36603
ZNF267	-0.570521	2.17856	-2.16649	0.0622351	0.23491	-4.36745
SF3B3	-0.391157	8.5894	-2.73696	0.0256241	0.142516	-4.36825
EMG1	-0.337429	6.51796	-2.60558	0.0314052	0.159686	-4.36844
RBM38	-0.302796	5.87418	-2.54787	0.0343507	0.167754	-4.36878
REV1	1.13133	0.222663	2.00162	0.0803964	0.269172	-4.36883
MRPS9	-0.295872	6.23693	-2.58391	0.03248	0.162941	-4.36905
PAM16	0.171577	5.82819	2.54959	0.0342591	0.16768	-4.37172
ZNF516	0.610648	3.57804	2.36804	0.045455	0.196692	-4.37273
PSAPL1	3.88747	-0.370336	1.56085	0.157268	0.392432	-4.37442
AKTIP	-0.485614	2.35799	-2.2184	0.0574007	0.224131	-4.37469
GIMAP1	-2.75158	1.77689	-1.8069	0.10849	0.316901	-4.37555
ABCD4	0.428137	1.6083	2.09341	0.069727	0.250503	-4.3758
PSMD12	-0.231534	7.18556	-2.64934	0.0293446	0.153665	-4.37769
TAX1BP3	0.402581	5.78092	2.54913	0.0342837	0.167707	-4.38133
TUFM	0.225684	9.26139	2.76179	0.0246608	0.140011	-4.3861
SLC25A17	-0.530349	3.45907	-2.33464	0.0478854	0.201796	-4.38667
BUB1B	0.228124	6.30793	2.57237	0.0330673	0.164324	-4.38703
UTP3	-0.210153	5.59696	-2.51796	0.0359868	0.172383	-4.38724
COPG1	0.193525	7.61909	2.67011	0.0284152	0.15128	-4.39042
APMAP	0.46163	6.10313	2.56485	0.0334562	0.164918	-4.39143
ACTR3B	0.274445	8.61874	2.72343	0.0261655	0.143732	-4.39318
NTPCR	0.198873	6.35367	2.58044	0.0326553	0.163295	-4.3934
ALDOA	-0.195689	10.6451	-2.81114	0.0228551	0.133299	-4.39381
VPS37A	-0.216526	4.59223	-2.4409	0.0405747	0.183956	-4.39389
HMOX2	0.217149	6.46434	2.58614	0.0323675	0.162691	-4.3939
GINS3	-0.27968	3.87055	-2.37447	0.0450018	0.195433	-4.39586
ERO1A	-0.279308	6.45363	-2.58001	0.0326771	0.163311	-4.39677
AMH	2.99671	-4.3688	1.63958	0.139811	0.365626	-4.39854
LIN37	-0.478589	3.02836	-2.26363	0.0534932	0.215993	-4.39862
PSMF1	-0.599705	6.81736	-2.59235	0.0320568	0.1615	-4.39943
ZNF428	0.355266	6.78567	2.60151	0.0316043	0.160419	-4.40116
NEK3	-0.675889	1.25903	-1.91675	0.0916574	0.289956	-4.40179
CMBL	4.55612	-0.655837	1.52064	0.166928	0.40467	-4.40322
TMEM69	-3.25855	2.77318	-1.96628	0.0849136	0.277433	-4.40375
[truncated: 6,768 more rows]

## Sheet: Supplemental Table 5
Supplemental Table 5. Details of shRNA sequences used in this report
Primer name	Target Sequence (Sense)	Oligo Sequence (Forward, 5'→3')
shHMGB1-1	GCAGATGACAAGCAGCCTTAT	CCGGGCAGATGACAAGCAGCCTTATCTCGAGATAAGGCTGCTTGTCATCTGCTTTTTT
shHMGB1-2	CCCAGATGCTTCAGTCAACTT	CCGGCCCAGATGCTTCAGTCAACTTCTCGAGAAGTTGACTGAAGCATCTGGGTTTTTT

## Sheet: Supplemental Table 6
Supplemental Table 6. Differential Gene Expression Between ShHMGB1 and Scramble Group
Gene Symbol	baseMean	log2FoldChange	lfcSE	stat	pvalue	padj
DPM1	1773.81	-0.120551	0.0773921	-1.55767	0.119311	0.190969
SCYL3	719.497	0.824452	0.0914046	9.01981	1.88414e-19	1.23305e-18
FIRRM	659.957	-1.18859	0.102365	-11.6113	3.61027e-31	3.42546e-30
FGR	9.69075	0.279284	0.678205	0.4118	0.680486	0.764596
CFH	13.2872	7.10249	1.2846	5.52897	3.22114e-08	1.19722e-07
FUCA2	4.15255	-0.281332	1.00407	-0.280191	0.779331	0.842869
GCLC	554.901	-0.117822	0.10075	-1.16945	0.242223	0.343956
NFYA	3017.83	0.223324	0.0621273	3.59461	0.000324877	0.00085193
STPG1	28.853	-0.163381	0.418696	-0.390215	0.696378	0.777296
NIPAL3	906.177	-0.743653	0.0843218	-8.81922	1.15257e-18	7.27422e-18
LAS1L	5334.81	0.286278	0.0574247	4.98528	6.18707e-07	2.10214e-06
ENPP4	2042.38	0.886021	0.201642	4.39402	1.11271e-05	3.40238e-05
SEMA3F	572.975	-0.385283	0.0962771	-4.00181	6.28585e-05	0.000178537
ANKIB1	2857.18	0.0429747	0.0819876	0.524161	0.600166	0.69767
CYP51A1	167.676	0.827344	0.206066	4.01495	5.94574e-05	0.000169595
KRIT1	917.936	0.0136378	0.103854	0.131317	0.895525	0.928553
RAD52	1607.1	0.554111	0.0733402	7.55534	4.17756e-14	2.18402e-13
NA	42.5813	0.868735	0.321981	2.69809	0.00697384	0.0149864
BAD	267.729	0.0375394	0.141803	0.26473	0.791217	0.851575
LAP3	2176.28	-0.964394	0.0654624	-14.732	4.01387e-49	5.71048e-48
CD99	4924.11	-0.609764	0.0570005	-10.6975	1.04547e-26	8.71438e-26
HS3ST1	293.184	1.20588	0.144336	8.35467	6.56161e-17	3.87846e-16
WNT16	38.0869	2.69923	0.403589	6.68807	2.26126e-11	1.0233e-10
HECW1	39.6371	-0.592684	0.349547	-1.69558	0.0899656	0.149765
MAD1L1	67.5919	-1.18633	0.260825	-4.54837	5.40629e-06	1.69911e-05
LASP1	7453.18	0.333118	0.050332	6.61841	3.63079e-11	1.62406e-10
SNX11	572.354	0.558321	0.0989824	5.64061	1.69451e-08	6.42632e-08
M6PR	3094.2	-0.143033	0.0634982	-2.25256	0.0242871	0.0467411
KLHL13	1489.7	2.93353	0.0854832	34.317	4.37836e-258	6.81396e-256
ICA1	3.5113	-0.581501	1.2343	-0.471118	0.637557	0.729277
DBNDD1	330.344	0.919595	0.122293	7.51961	5.49407e-14	2.85417e-13
ALS2	1598.99	0.766084	0.0731958	10.4662	1.23467e-25	9.94081e-25
CASP10	1309.69	0.71549	0.0725148	9.8668	5.79835e-23	4.28712e-22
CFLAR	2443.82	1.27855	0.0701504	18.2258	3.22292e-74	6.96517e-73
TFPI	1884.45	2.64417	0.0788872	33.5184	2.59613e-246	3.60114e-244
NDUFAF7	1092.87	0.298519	0.0748526	3.98809	6.66084e-05	0.000188663
RBM5	4655.73	0.352197	0.053046	6.63947	3.14808e-11	1.41259e-10
MTMR7	102.543	0.124247	0.206206	0.60254	0.546815	0.650888
SLC7A2	2.79949	-5.02027	1.73272	-2.89734	0.00376341	0.00846882
ARF5	3078.87	-0.0693957	0.0616265	-1.12607	0.260136	0.363566
SARM1	147.134	-0.318159	0.185534	-1.71483	0.086377	0.144536
POLDIP2	3302.49	-0.24991	0.0559679	-4.46524	7.99776e-06	2.48481e-05
PLXND1	8724.44	-1.1859	0.0503053	-23.5741	7.11299e-123	2.91404e-121
AK2	7519.39	-0.986542	0.052283	-18.8693	2.0402e-79	4.73383e-78
CD38	8640.5	-2.50449	0.050421	-49.6717	0	0
FKBP4	2195	-1.21579	0.0626394	-19.4093	6.43573e-84	1.59012e-82
KDM1A	10338.1	-0.28815	0.0507352	-5.6795	1.35087e-08	5.16063e-08
RBM6	3536.25	0.262763	0.0617816	4.25309	2.10838e-05	6.274e-05
CAMKK1	398.945	-0.360837	0.114243	-3.15851	0.00158578	0.0037936
RECQL	1698.4	-0.622313	0.071353	-8.72161	2.74275e-18	1.70615e-17
VPS50	852.832	-0.122888	0.0862342	-1.42505	0.154143	0.236865
HSPB6	22.516	-2.39524	0.49224	-4.866	1.13878e-06	3.78206e-06
ARHGAP33	6366.61	-0.0366037	0.0517699	-0.707046	0.479538	0.590627
NDUFAB1	1695.79	-0.763885	0.0665462	-11.479	1.68172e-30	1.56708e-29
SLC22A16	648.698	-0.919526	0.0952447	-9.65436	4.71111e-22	3.37663e-21
ZMYND10	70.0279	0.142604	0.256851	0.555199	0.578759	0.67872
ARX	719.771	3.30673	0.117194	28.216	3.71932e-175	2.66652e-173
SLC25A13	282.148	-0.100057	0.138241	-0.723785	0.469198	0.580847
ST7	132.552	0.751347	0.207812	3.61551	0.000299757	0.000789872
CDC27	3590.43	-0.559439	0.0791471	-7.06835	1.56788e-12	7.59192e-12
SLC4A1	27.356	0.450593	0.435588	1.03445	0.300927	0.409185
HCCS	547.049	-0.101306	0.105744	-0.95803	0.338047	0.450007
DVL2	4707.45	-0.240897	0.0541153	-4.45155	8.52521e-06	2.63872e-05
PRSS22	3.20141	1.83579	1.25156	1.4668	0.14243	0.221648
UPF1	6768.1	-0.131026	0.0556971	-2.35248	0.0186488	0.0368258
SKAP2	4760.02	1.05238	0.0808891	13.0102	1.07052e-38	1.22305e-37
SLC25A5	9830.17	-1.60877	0.0526646	-30.5475	6.11063e-205	6.14022e-203
MCUB	598.518	-1.96867	0.124424	-15.8222	2.18644e-56	3.54314e-55
HOXA11	39.7071	0.79054	0.354181	2.23202	0.0256136	0.0490351
POLR2J	1132.43	-0.523874	0.0837599	-6.25447	3.98858e-10	1.67133e-09
DHX33	1542.88	-0.520357	0.0753812	-6.903	5.09156e-12	2.39058e-11
THSD7A	3690.87	0.227349	0.0950668	2.39146	0.0167815	0.0334594
LIG3	1377.01	-0.398757	0.0804399	-4.9572	7.15159e-07	2.41794e-06
RPAP3	1699.21	-0.0980309	0.0922803	-1.06232	0.288092	0.395236
ACSM3	29.251	-1.18927	0.467632	-2.54317	0.0109852	0.0227448
REXO5	1122.09	-0.328729	0.0852111	-3.85782	0.000114402	0.000316278
CIAPIN1	2094.19	0.123111	0.0683308	1.8017	0.0715932	0.122612
SPPL2B	7381.68	0.401366	0.0490758	8.1785	2.87399e-16	1.65247e-15
ATOSB	2284.79	2.19386	0.0750789	29.2208	1.0568e-187	8.84351e-186
COPZ2	45.521	2.03404	0.357775	5.68525	1.30625e-08	4.9954e-08
PRKAR2B	421.718	-2.38254	0.178117	-13.3763	8.32208e-41	9.96269e-40
MSL3	1688.47	0.319304	0.0687698	4.64308	3.43259e-06	1.0943e-05
CREBBP	7477.17	0.610457	0.0524525	11.6383	2.63271e-31	2.50633e-30
TSPOAP1	14105.3	-1.35724	0.0521554	-26.023	2.72094e-149	1.50317e-147
MPO	1675.48	-2.73304	0.077925	-35.0727	1.7555e-269	2.98704e-267
GCFC2	536.257	-0.600796	0.142518	-4.21557	2.49147e-05	7.36333e-05
WDR54	1462.53	-0.605732	0.0723613	-8.37095	5.71564e-17	3.38155e-16
CROT	478.22	0.392534	0.125302	3.13269	0.0017321	0.00412314
ABCB4	3.27488	0.419859	1.12936	0.371766	0.710067	0.786795
KMT2E	5635.92	0.224389	0.0537016	4.17845	2.93501e-05	8.61532e-05
RHBDD2	1120.22	0.457626	0.0812367	5.63324	1.7685e-08	6.69596e-08
IBTK	3939.99	0.125215	0.0618832	2.02342	0.0430302	0.0780401
ZNF195	2354.69	0.751302	0.0728916	10.3071	6.54419e-25	5.14406e-24
MYCBP2	8089.57	0.56532	0.0497146	11.3713	5.81111e-30	5.3313e-29
FBXL3	1834.1	0.609752	0.248056	2.45812	0.0139666	0.0282913
ITGAL	68.6212	0.218172	0.261547	0.83416	0.404191	0.517568
PDK2	721.339	-0.763978	0.0940185	-8.12582	4.4435e-16	2.5315e-15
ITGA3	8.40699	2.80638	0.864705	3.24547	0.00117255	0.00286274
ZFX	1753.26	0.233931	0.0817297	2.86225	0.0042064	0.00939282
LAMP2	3841.59	-0.377149	0.0876171	-4.30451	1.67355e-05	5.02814e-05
ITGA2B	948.455	1.52065	0.0830266	18.3153	6.25158e-75	1.36726e-73
GDE1	1646.48	-0.202738	0.0739964	-2.73983	0.00614706	0.0133559
REX1BD	1310.92	0.328985	0.0721757	4.55811	5.1615e-06	1.62478e-05
CRLF1	17.8605	-0.517186	0.504808	-1.02452	0.30559	0.414298
OSBPL7	3187.22	1.68727	0.0585131	28.8357	7.65098e-183	6.06447e-181
YBX2	10.1492	0.499448	0.702375	0.711084	0.477032	0.588207
MAP3K14	654.802	-0.0255768	0.103409	-0.247336	0.804648	0.860334
TMEM132A	1632.26	3.4723	0.0910665	38.1293	0	0
AP2B1	9306.34	-0.355448	0.0508249	-6.99357	2.67978e-12	1.28035e-11
ZNF263	617.39	0.0258742	0.100644	0.257087	0.797111	0.855397
SPATA20	2702.32	0.997343	0.0594768	16.7686	4.14072e-63	7.35958e-62
CACNA1G	185.515	-1.12482	0.18087	-6.21897	5.00445e-10	2.0857e-09
TNFRSF12A	54.2988	-0.243356	0.285501	-0.852384	0.394001	0.507832
MAP3K9	441.007	-0.546831	0.115794	-4.72246	2.33004e-06	7.55266e-06
RALA	2088.05	-0.586732	0.0742928	-7.89756	2.84407e-15	1.56984e-14
BAIAP2L1	20.4842	0.421282	0.484287	0.8699	0.384355	0.498445
KDM7A	1015.52	0.732022	0.0886933	8.25341	1.53939e-16	8.9417e-16
ETV1	48.6735	7.10727	1.05611	6.72967	1.70043e-11	7.75138e-11
AGK	3195.71	0.10239	0.0579486	1.7669	0.0772444	0.131144
ALDH3B1	124.421	0.269456	0.202645	1.32969	0.183619	0.274209
PHTF2	2312.67	-0.390101	0.110327	-3.53587	0.00040643	0.00105291
FARP2	1306.59	-0.653846	0.0750437	-8.71288	2.96259e-18	1.83976e-17
GGCT	800.88	-1.9194	0.0889503	-21.5784	2.86655e-103	9.04364e-102
DBF4	1592.76	-1.18731	0.0873758	-13.5886	4.67973e-42	5.72034e-41
TBXA2R	180.012	1.21033	0.168163	7.19735	6.1395e-13	3.03209e-12
IFRD1	602.117	0.0148295	0.146827	0.101	0.919551	0.943004
COX10	622.124	-0.60283	0.0978673	-6.15966	7.28994e-10	3.01509e-09
GTF2IRD1	3515.06	0.0453668	0.062308	0.728105	0.466549	0.578495
PAF1	2722.3	-0.499138	0.0633781	-7.87556	3.39228e-15	1.86396e-14
VPS41	1952.8	0.121509	0.0656789	1.85005	0.0643062	0.111576
ARHGAP44	597.628	0.27398	0.098765	2.77406	0.00553619	0.0121225
ELAC2	3646.57	-0.208407	0.0561055	-3.71456	0.000203561	0.000547652
SCIN	2.84795	2.83528	1.54576	1.83423	0.06662	0.115025
ARSD	1084.35	1.25211	0.0833013	15.0311	4.59353e-51	6.79657e-50
MYH13	6.88815	-0.8068	0.875813	-0.921201	0.356946	0.469944
ADIPOR2	3647.65	-0.367424	0.0602514	-6.09818	1.07282e-09	4.39088e-09
CDKL3	44.5679	-0.522871	0.326873	-1.59962	0.109684	0.177777
UPP2	13.3216	1.68815	0.613425	2.752	0.00592319	0.0129068
MARK4	5161.79	0.800958	0.053807	14.8857	4.07888e-50	5.93869e-49
PROM1	1181.49	-0.0963176	0.0811886	-1.18634	0.235487	0.336035
CCDC124	1907.62	-0.175998	0.0667288	-2.63752	0.00835157	0.0176938
CEACAM21	136.155	0.129992	0.183676	0.707723	0.479118	0.590265
PAFAH1B1	8582.75	0.309318	0.0483345	6.39954	1.55849e-10	6.70781e-10
NOS2	20.7712	0.973223	0.460593	2.11298	0.0346028	0.0641976
BLTP2	4250.1	0.270554	0.0538666	5.02266	5.09613e-07	1.74308e-06
GAS7	3125.38	-1.62231	0.0590154	-27.4896	2.3395e-166	1.51936e-164
TRAPPC6A	1120.1	-0.00951792	0.0904567	-0.105221	0.916201	0.941127
CD79B	2425.76	-1.0098	0.0650171	-15.5313	2.13057e-54	3.33611e-53
SCN4A	1929.38	-0.29948	0.0634992	-4.71629	2.40188e-06	7.76777e-06
ST7L	598.795	-0.152507	0.100114	-1.52333	0.127675	0.202197
PAX6	1.77131	1.24903	1.87341	0.666712	0.504956	0.613684
RPUSD1	1202.04	-0.0603196	0.0790481	-0.763075	0.445419	0.558151
RHBDF1	36.0798	1.42042	0.356956	3.97926	6.91306e-05	0.00019546
LUC7L	7688.55	1.26349	0.0534361	23.6449	1.33331e-123	5.50649e-122
CACNA2D2	284.165	-0.463106	0.161501	-2.86751	0.00413719	0.00925042
BAIAP3	316.438	2.1239	0.135858	15.6332	4.32372e-55	6.85006e-54
TSR3	1164.89	-0.307634	0.0776257	-3.96304	7.40011e-05	0.0002084
PIGQ	1828.42	0.837655	0.0645168	12.9835	1.51766e-38	1.72925e-37
CRAMP1	2538.52	0.196587	0.0633605	3.10267	0.00191782	0.00453773
TEAD3	407.258	1.16157	0.117631	9.87468	5.36017e-23	3.97119e-22
DNAJC11	2246.15	0.177045	0.0672932	2.63095	0.00851472	0.0180155
MYLIP	939.123	-0.0689513	0.104757	-0.658205	0.510406	0.618629
NOX1	14.5468	-0.0343046	0.549827	-0.0623917	0.950251	0.966007
E2F2	9644.33	-1.54358	0.0547112	-28.2133	4.02176e-175	2.87527e-173
PSMB1	5244.56	-0.381789	0.0577808	-6.60753	3.90781e-11	1.74338e-10
SYN1	6.37241	2.33835	1.05611	2.21411	0.0268212	0.0510673
JARID2	2617.26	0.803469	0.0623082	12.8951	4.79792e-38	5.38037e-37
CDKL5	227.641	1.06595	0.173879	6.13039	8.76634e-10	3.60585e-09
CDK11A	218.279	0.737793	0.156771	4.70617	2.52416e-06	8.14876e-06
NADK	5246.76	-0.746794	0.0624097	-11.966	5.35552e-33	5.29391e-32
DLEC1	50.8829	2.13035	0.327159	6.51167	7.43191e-11	3.25751e-10
CYTH3	3031.97	-1.12272	0.063732	-17.6162	1.84881e-69	3.68075e-68
ADAM22	852.15	-0.350957	0.0893003	-3.93008	8.49176e-05	0.000237648
SYPL1	2343.2	-0.886404	0.184174	-4.81287	1.48778e-06	4.90221e-06
CYB561	155.51	1.73525	0.185461	9.35639	8.25087e-21	5.65942e-20
SPAG9	5903.58	0.522337	0.05863	8.90905	5.14729e-19	3.31001e-18
CELSR3	507.02	-0.0142104	0.117745	-0.120688	0.903938	0.933679
AASS	4266.28	0.190833	0.175045	1.09019	0.275629	0.381211
PLEKHG6	5.53741	0.708166	0.903776	0.783564	0.433296	0.546286
SS18L2	360.141	-0.664004	0.127219	-5.21938	1.79523e-07	6.34359e-07
MPND	409.908	-0.320053	0.113662	-2.81583	0.00486522	0.0107529
CRY1	1682.04	-0.528617	0.10392	-5.08678	3.64188e-07	1.25934e-06
PGLYRP1	25.6851	-0.145731	0.4029	-0.361705	0.717573	0.793355
NFIX	2283.22	-0.896157	0.0756623	-11.8442	2.30676e-32	2.24887e-31
ST3GAL1	2247.64	1.37474	0.0777823	17.6741	6.6354e-70	1.33351e-68
MMP25	160.785	0.359076	0.174365	2.05933	0.0394623	0.0722316
PKD1	5094.38	0.118561	0.0517451	2.29126	0.0219483	0.0426647
MAPK8IP2	791.611	0.61033	0.0919791	6.63553	3.23344e-11	1.44963e-10
MED24	5303.51	0.4145	0.0559766	7.40488	1.31266e-13	6.68589e-13
RHOBTB2	541.564	0.775115	0.101794	7.61457	2.64569e-14	1.39661e-13
HEATR5B	1670.49	0.104547	0.068277	1.53122	0.125716	0.199641
SEC62	3616.93	-0.219323	0.100037	-2.19242	0.0283492	0.0536524
RPS20	28298.9	-1.00602	0.049699	-20.2423	4.15229e-91	1.12624e-89
CSDE1	23341.2	0.0220059	0.0437169	0.503373	0.614702	0.709364
UBE3C	2722.21	0.104109	0.0594023	1.7526	0.07967	0.134672
REV3L	1529.94	-0.979417	0.0748531	-13.0845	4.03628e-39	4.65513e-38
PAX7	22.7314	-3.47509	0.585307	-5.93722	2.89901e-09	1.15413e-08
MASP2	659.325	0.55637	0.0921356	6.03861	1.5545e-09	6.28973e-09
FAM76A	437.311	0.224417	0.119606	1.8763	0.0606135	0.105998
TRAF3IP3	430.926	-0.775988	0.147343	-5.26655	1.39009e-07	4.94279e-07
POMT2	1216.2	-0.135931	0.0757296	-1.79495	0.0726618	0.124257
VTA1	2652.5	-0.710101	0.0712449	-9.96704	2.12463e-23	1.59585e-22
MLXIPL	11.1185	-0.209503	0.737729	-0.283984	0.776423	0.840543
BAZ1B	7936.97	-0.760518	0.0550622	-13.812	2.15796e-43	2.72257e-42
RANBP9	3437.77	0.0031833	0.0550623	0.0578127	0.953898	0.968238
ETV7	210.622	-0.714774	0.150282	-4.75623	1.97238e-06	6.42844e-06
SPRTN	716.107	0.235407	0.0942352	2.49808	0.0124868	0.0255553
METTL13	1141.39	-0.200182	0.089638	-2.23323	0.025534	0.0489003
DYRK4	628.64	-0.910804	0.093725	-9.71783	2.53121e-22	1.83014e-21
ZNF207	12302.2	-0.444116	0.08198	-5.41737	6.04834e-08	2.20531e-07
UQCRC1	3517.48	-0.397396	0.0594445	-6.68515	2.30686e-11	1.04264e-10
STARD3NL	1643.97	-0.0947446	0.0710239	-1.33398	0.18221	0.272471
CD9	1541.9	1.23556	0.0725591	17.0283	5.06924e-65	9.34169e-64
HHATL	49.2577	8.99272	1.21041	7.42949	1.0902e-13	5.58516e-13
NCAPD2	13261.3	-1.68531	0.0500322	-33.6844	9.77132e-249	1.39326e-246
IFFO1	3132.98	0.736001	0.0622372	11.8257	2.87364e-32	2.79512e-31
GIPR	636.105	1.9459	0.109166	17.825	4.51773e-71	9.26897e-70
PHF7	424.787	-1.41762	0.110681	-12.8081	1.47707e-37	1.63625e-36
SEMA3G	25.6583	-1.10746	0.426969	-2.59376	0.00949316	0.0199009
NISCH	3229.95	0.636802	0.0564284	11.2851	1.5541e-29	1.41057e-28
FUZ	1445.38	-0.735183	0.0702051	-10.4719	1.16248e-25	9.37436e-25
SLC6A13	986.805	7.49723	0.270427	27.7237	3.61979e-169	2.43768e-167
IDS	197.262	0.995731	0.164671	6.04677	1.47777e-09	5.98873e-09
PRSS3	5.47553	1.53713	1.02548	1.49894	0.133889	0.210526
ZNF200	595.519	-0.449729	0.0960465	-4.68241	2.83521e-06	9.10059e-06
CD4	87.4057	1.45968	0.232792	6.27034	3.60264e-10	1.51366e-09
LRRC23	416.34	0.420709	0.10908	3.85689	0.000114841	0.000317424
BTK	5352.84	0.165869	0.0544818	3.04449	0.00233072	0.00544054
HFE	277.302	-0.831033	0.142226	-5.84306	5.12503e-09	2.00931e-08
SCMH1	2970.17	-0.662237	0.0597576	-11.0821	1.53299e-28	1.34919e-27
FYN	2579.63	-0.681358	0.066334	-10.2716	9.45932e-25	7.40583e-24
HIVEP2	1807.07	-0.245522	0.0698889	-3.51304	0.000443014	0.00114259
ELOA	729.725	0.196219	0.0888098	2.20943	0.0271449	0.0516258
LYPLA2	2332.3	0.462568	0.078231	5.91285	3.36234e-09	1.3338e-08
CLCN6	3128.33	1.08262	0.0640099	16.9133	3.58733e-64	6.50742e-63
MRC2	5287.53	-0.298359	0.0532871	-5.59909	2.15482e-08	8.1141e-08
TSPAN9	2252.91	-0.73743	0.0659851	-11.1757	5.36279e-29	4.79084e-28
BTBD7	2637.96	-0.219546	0.0636302	-3.45034	0.000559882	0.001425
APBA3	1251.13	0.772951	0.0760641	10.1618	2.93491e-24	2.27131e-23
MKS1	1315.85	0.451637	0.0769987	5.86552	4.47731e-09	1.76431e-08
ABHD5	160.738	-0.674479	0.169699	-3.97456	7.05104e-05	0.000199119
AKAP8L	6550.76	1.03183	0.0551245	18.7182	3.5172e-78	8.00798e-77
MBTD1	3964.52	-0.135599	0.0849201	-1.59679	0.110313	0.178673
UTP18	1540.17	-1.10909	0.0741188	-14.9637	1.26834e-50	1.86581e-49
RNF216	3928.81	0.481651	0.0563394	8.54911	1.2404e-17	7.51631e-17
TTC19	2590.09	-0.2368	0.0687359	-3.44508	0.0005709	0.00145073
PTBP1	22983.5	-0.664591	0.046071	-14.4254	3.58433e-47	4.91579e-46
DPF1	385.058	-0.335333	0.114628	-2.9254	0.00344014	0.00779913
LARS2	640.218	-0.247304	0.0967206	-2.55689	0.0105613	0.0219419
PIK3C2A	2645.48	0.674823	0.18945	3.56201	0.000368027	0.000958583
PLAUR	1158.57	-0.83571	0.0783096	-10.6719	1.37827e-26	1.14436e-25
ANLN	2830.82	-1.70606	0.0749595	-22.7597	1.15049e-114	4.23112e-113
WIZ	3393.75	1.0112	0.0616325	16.407	1.70382e-60	2.91856e-59
RABGAP1	3121.54	0.366341	0.0595709	6.14967	7.76468e-10	3.20572e-09
QPCTL	702.942	0.278289	0.0966764	2.87856	0.003995	0.0089521
PPP5C	4992.7	-0.511511	0.0554031	-9.23253	2.64307e-20	1.78369e-19
CEP68	1677.84	0.268169	0.0667693	4.01635	5.91056e-05	0.00016861
MAP4K3	1087.55	-0.061542	0.245537	-0.250642	0.802091	0.858715
ZBTB32	91.1284	0.796473	0.25192	3.16161	0.00156897	0.0037562
TYROBP	16.3983	3.62876	0.706973	5.13282	2.85435e-07	9.93881e-07
LDAF1	1829.86	-0.934321	0.0712163	-13.1195	2.54634e-39	2.95142e-38
GABRA3	1020.97	-2.30624	0.0980613	-23.5183	2.64827e-122	1.07802e-120
BRCA1	3197.88	-1.64442	0.0595803	-27.6	1.11264e-167	7.26288e-166
ERCC1	2792.27	0.446455	0.0602156	7.41428	1.22285e-13	6.23839e-13
CD22	7792.96	-0.589748	0.0489176	-12.0559	1.80476e-33	1.80497e-32
SEMA3B	603.195	1.94183	0.106993	18.1492	1.30374e-73	2.78922e-72
MBTPS2	749.076	-0.206408	0.0961853	-2.14594	0.0318774	0.0595962
PRICKLE3	451.931	0.605339	0.116063	5.2156	1.83225e-07	6.4717e-07
EXTL3	2327.24	0.46581	0.0624679	7.45679	8.86546e-14	4.5592e-13
ELOVL5	7081.74	-0.994436	0.0605186	-16.4319	1.13037e-60	1.93888e-59
ALOX5	1492.26	-2.34529	0.0814967	-28.7777	4.08092e-182	3.20484e-180
CALCOCO1	7652.81	1.19997	0.0510108	23.5239	2.32229e-122	9.4835e-121
UBR7	4969.65	-1.21691	0.0538402	-22.6022	4.12026e-113	1.47491e-111
MAP4K5	2987.49	-0.00466293	0.097067	-0.0480383	0.961686	0.973471
EHD3	235.886	1.87757	0.150572	12.4696	1.09385e-35	1.15651e-34
PSMC4	3034.2	0.0453844	0.0615597	0.737243	0.460975	0.573142
MAN2B2	1669.31	0.277459	0.0736888	3.76528	0.000166362	0.000452381
CLDN11	11.44	1.39304	0.670988	2.07611	0.0378842	0.0696577
SLC25A39	5246.63	-0.65719	0.0551103	-11.925	8.76829e-33	8.61737e-32
MVP	1297.43	0.156361	0.0797038	1.96178	0.049788	0.0888753
NUB1	3694.11	-0.354667	0.0613399	-5.78199	7.38214e-09	2.86998e-08
PGM3	1881.95	0.512563	0.0747487	6.85715	7.02458e-12	3.27168e-11
RWDD2A	695.182	0.621349	0.0978563	6.34961	2.15868e-10	9.19188e-10
CLK1	9303.05	0.455861	0.0555177	8.21108	2.19211e-16	1.2661e-15
POLR3B	286.2	0.704859	0.153353	4.59631	4.30032e-06	1.36023e-05
ANGEL1	1220.27	-0.204035	0.083561	-2.44175	0.0146162	0.0294971
RNF14	917.536	0.426354	0.0865572	4.92569	8.40636e-07	2.81902e-06
DNASE1L1	379.573	0.246047	0.113412	2.16949	0.0300456	0.0564861
DDX11	6576.98	-0.599446	0.0531715	-11.2738	1.76705e-29	1.60101e-28
HEBP1	1233.19	-1.52594	0.0750925	-20.3208	8.42543e-92	2.32227e-90
GPRC5A	16.3746	-1.74844	0.55799	-3.13347	0.00172755	0.00411347
MAMLD1	178.378	-1.83418	0.192604	-9.52308	1.68129e-21	1.18181e-20
CD6	13.3414	4.6074	0.990157	4.6532	3.26829e-06	1.04362e-05
TACC3	10397	-0.764644	0.0526658	-14.5188	9.21004e-48	1.27685e-46
UFL1	2250.66	0.185817	0.194357	0.956063	0.339041	0.451
POLA2	1264.9	-0.989378	0.0751498	-13.1654	1.3878e-39	1.61738e-38
ZC3H3	1503.49	0.265302	0.0699008	3.7954	0.000147403	0.000402974
CAPN1	7870.93	0.641323	0.0510145	12.5714	3.03398e-36	3.25773e-35
MDH1	8502.27	0.366078	0.0501625	7.29784	2.92418e-13	1.46773e-12
SLC30A9	1946.72	0.104719	0.086395	1.2121	0.225476	0.324033
MTMR11	92.1898	2.12739	0.253495	8.39224	4.76985e-17	2.82987e-16
COX15	1941.27	-0.282044	0.064635	-4.36364	1.27914e-05	3.8806e-05
CCDC88C	3156.74	-0.0480986	0.0574847	-0.836721	0.402749	0.516136
YAF2	821.553	-0.204561	0.116526	-1.75549	0.0791747	0.134004
ZMYND11	1328.81	0.909273	0.0788896	11.5259	9.76961e-31	9.1538e-30
WAS	3594.61	0.0240011	0.0548118	0.437882	0.661472	0.748829
DPEP1	30.7555	2.27764	0.45381	5.01892	5.19637e-07	1.77522e-06
BID	1586.94	-0.439537	0.0747114	-5.88312	4.02592e-09	1.58963e-08
MATR3	449.719	-0.120938	0.110714	-1.09235	0.27468	0.380208
NPC1L1	9.13763	1.74182	0.736396	2.36533	0.0180141	0.0356789
XYLT2	1600.84	0.606911	0.0687607	8.82643	1.08073e-18	6.831e-18
NUDCD3	4613.65	0.32783	0.0522517	6.27405	3.51776e-10	1.48012e-09
CLCA4	5.23481	2.69268	1.11785	2.4088	0.0160052	0.0320342
GLT8D1	1106.86	0.267197	0.0802589	3.32918	0.000871007	0.00216526
ATP2C1	2344.05	-0.133181	0.0713547	-1.86647	0.0619757	0.108124
SLC38A5	5852.95	-0.958804	0.056292	-17.0327	4.69982e-65	8.66715e-64
RALBP1	5793.99	-0.478778	0.0511946	-9.35214	8.58953e-21	5.88855e-20
RUFY3	4056.4	2.53437	0.0615083	41.2037	0	0
CNTN1	152.957	10.6274	1.18945	8.93472	4.08216e-19	2.63703e-18
SLC11A1	121.422	2.80029	0.242587	11.5434	7.96759e-31	7.48461e-30
WWTR1	9.97648	0.561086	0.715023	0.78471	0.432624	0.545789
AGPS	2862.82	-0.848394	0.067188	-12.6272	1.49574e-36	1.61762e-35
STEEP1	834.727	-0.272176	0.0872831	-3.11832	0.00181886	0.004318
ATP1A2	42.4372	5.89611	0.777285	7.58552	3.31159e-14	1.73877e-13
TTC27	382.746	-0.533757	0.114705	-4.65331	3.26651e-06	1.04318e-05
ZNF582	47.5216	0.985333	0.323334	3.04741	0.00230819	0.00539239
VSIG2	44.3854	-0.122018	0.351208	-0.347423	0.728273	0.80199
PHLDB1	576.497	3.05206	0.118109	25.841	3.07153e-147	1.65739e-145
PRDM11	151.093	1.49349	0.184297	8.10369	5.33163e-16	3.02869e-15
CD74	66795.4	-0.522272	0.0485032	-10.7678	4.88645e-27	4.10793e-26
HGF	85.1164	4.69941	0.405394	11.5922	4.51341e-31	4.26809e-30
ZRANB1	750.245	-0.052759	0.0884283	-0.59663	0.550754	0.654053
NCDN	1728.09	0.458487	0.0712956	6.43079	1.26944e-10	5.49152e-10
ADGRA2	1289.6	0.280763	0.0717395	3.91364	9.09152e-05	0.00025346
CCT8L1P	1.9533	0.835333	1.50179	0.556223	0.578058	0.67821
ZFP64	1047.66	-0.134557	0.0884318	-1.52159	0.128111	0.202828
MNAT1	888.418	-0.415949	0.0845114	-4.92181	8.57459e-07	2.87392e-06
SAMD4A	932.308	0.901761	0.0886866	10.168	2.75643e-24	2.13577e-23
RUNX3	5.10868	-1.62137	1.02429	-1.58292	0.11344	0.182925
MRE11	4684.8	-1.4425	0.0765663	-18.8398	3.561e-79	8.20283e-78
PLEKHB1	141.423	1.20636	0.191468	6.30062	2.96466e-10	1.25297e-09
SERPINB1	18.2015	0.387438	0.501239	0.77296	0.439546	0.552338
CYP3A43	9.70555	1.17488	0.676303	1.7372	0.0823512	0.138581
SLC7A9	7.56606	0.213748	0.74987	0.285047	0.775608	0.839839
SPAST	1563.84	0.329272	0.284217	1.15852	0.246651	0.348846
NRXN3	7.95039	-2.9039	0.97129	-2.98973	0.0027922	0.0064342
OSBPL5	2330.04	-1.02775	0.0616176	-16.6795	1.84798e-62	3.25283e-61
AQR	2804.45	-0.131048	0.0575495	-2.27714	0.0227778	0.0441325
CPS1	90.9368	0.250107	0.242297	1.03223	0.301963	0.410274
FHL1	2778.51	-0.375884	0.070414	-5.3382	9.38723e-08	3.38213e-07
RTF2	2034.2	-0.340584	0.0642793	-5.2985	1.16757e-07	4.17891e-07
NLRP2	2218.82	0.267664	0.0646515	4.14011	3.47142e-05	0.000101131
SLC45A4	872.024	0.504188	0.0827728	6.09123	1.12044e-09	4.57773e-09
RNF10	4598.98	0.0951411	0.0644103	1.47711	0.139646	0.218064
ZNF839	1085.71	0.380576	0.0816739	4.6597	3.16665e-06	1.01281e-05
ZDHHC6	3730.48	-0.184852	0.0561325	-3.29315	0.00099073	0.00244455
GRAMD1B	1438.11	-1.05605	0.0722185	-14.623	2.00382e-48	2.81318e-47
RNH1	2824.58	-0.108798	0.0576812	-1.8862	0.0592683	0.103966
NDUFS1	3726.86	-0.108589	0.0546566	-1.98675	0.0469501	0.0843047
RB1CC1	2420.18	0.0278088	0.0804811	0.345532	0.729695	0.803208
ERP44	3097.92	1.00349	0.058724	17.0882	1.81701e-65	3.37767e-64
ALAS1	1223.39	0.480538	0.0771941	6.22506	4.81375e-10	2.00787e-09
BIRC3	93.9851	0.0237501	0.216732	0.109583	0.91274	0.939111
AKAP11	2331.34	-0.262759	0.106873	-2.45862	0.0139473	0.0282565
GLRX2	681.32	-0.365572	0.0998381	-3.66165	0.000250597	0.000666525
SNAPC1	278.118	-0.176353	0.135606	-1.30048	0.193438	0.286458
DERA	1146.76	-1.10228	0.0839089	-13.1366	2.03209e-39	2.35965e-38
STRAP	4243.55	-0.183431	0.0548807	-3.34235	0.000830716	0.00206893
ABCC2	210.48	-0.141231	0.163007	-0.866407	0.386267	0.500111
DEF6	4883.37	-0.285211	0.0532206	-5.35903	8.36693e-08	3.02349e-07
PLEKHO1	6182.71	1.84368	0.0547033	33.7033	5.16554e-249	7.40675e-247
GCLM	938.551	-1.63752	0.139609	-11.7293	9.02274e-32	8.69994e-31
UBR2	3185.96	-0.119712	0.0602597	-1.98661	0.046966	0.0843155
EHD2	1425.96	0.223021	0.0741396	3.00812	0.00262868	0.00608323
CCDC28A	961.251	-0.981493	0.102887	-9.5395	1.43518e-21	1.01216e-20
RRAGD	2212.54	-0.32919	0.0637146	-5.16663	2.38357e-07	8.3474e-07
HSF2	2520.08	-0.0380614	0.0614833	-0.619052	0.535882	0.641555
PHF20	1788.6	-0.457782	0.0656061	-6.97774	2.99976e-12	1.42788e-11
HSD17B6	511.056	-0.779691	0.115337	-6.7601	1.37897e-11	6.31874e-11
NR1H3	543.128	0.115311	0.10306	1.11887	0.263195	0.367119
TYMP	106.032	-1.42548	0.21983	-6.48448	8.90403e-11	3.8894e-10
NCAPH2	3829.71	-0.714842	0.0600896	-11.8963	1.23779e-32	1.21135e-31
TOMM34	1230.21	-0.169017	0.0762709	-2.21601	0.0266907	0.0508759
SEC63	4908.58	-0.169597	0.0594095	-2.8547	0.00430769	0.00960639
KPNA6	4115.69	0.17079	0.0565694	3.01913	0.00253503	0.00588197
VIM	9823.65	-0.626046	0.0493869	-12.6764	7.996e-37	8.69544e-36
RTEL1-TNFRSF6B	693.073	0.388577	0.0887403	4.37881	1.19327e-05	3.63391e-05
FAS	311.061	0.233346	0.123509	1.8893	0.058852	0.103314
RNASET2	2154.5	0.0169101	0.0624942	0.270586	0.786709	0.848046
CD44	400.895	7.24346	0.38724	18.7054	4.47747e-78	1.01853e-76
KCNG1	1.8677	-1.58351	1.81785	-0.871089	0.383706	0.497775
BTN3A1	4368.94	0.271626	0.0542403	5.00782	5.50501e-07	1.87865e-06
MIPEP	384.259	-1.44203	0.12633	-11.4148	3.52827e-30	3.25803e-29
PRKCH	648.436	0.130096	0.0916388	1.41966	0.155707	0.238914
INSRR	515.874	2.75891	0.122202	22.5767	7.33985e-113	2.62007e-111
IFNGR1	2538.21	0.569715	0.0589836	9.65887	4.50827e-22	3.23215e-21
B4GALT7	961.898	1.19854	0.0816662	14.6761	9.17409e-49	1.29651e-47
SH2D2A	156.402	3.08701	0.228203	13.5275	1.07692e-41	1.3095e-40
VRK2	483.94	-1.02726	0.113972	-9.01331	1.99924e-19	1.30636e-18
TNFRSF1B	560.167	-1.76142	0.111496	-15.7981	3.20494e-56	5.18047e-55
VEZT	6080.75	1.07488	0.0576236	18.6534	1.18509e-77	2.6791e-76
POU2F2	245.481	0.53106	0.138129	3.84465	0.000120723	0.00033296
BRD9	2576.05	0.150456	0.0613975	2.45052	0.0142648	0.028845
SNX1	5283.27	-0.133174	0.0536166	-2.48382	0.012998	0.0264986
TBPL1	589.459	-0.239144	0.0985058	-2.42772	0.0151943	0.0305525
BMAL2	371.593	-0.263839	0.12241	-2.15536	0.0311333	0.0583205
BCLAF1	7051.39	0.136929	0.0892882	1.53357	0.125137	0.198846
SLC39A9	4876.18	-0.780718	0.0515946	-15.1318	9.99524e-52	1.49448e-50
ANK1	232.498	-1.7817	0.155724	-11.4414	2.59621e-30	2.40899e-29
TFB1M	486.023	-0.742357	0.103752	-7.15511	8.36053e-13	4.09491e-12
RABEP1	789.121	-0.206835	0.0868984	-2.38019	0.0173036	0.0344116
HMGB3	3147.1	-1.16797	0.0720761	-16.2047	4.67069e-59	7.83246e-58
NUP160	5132.82	-1.19001	0.0601368	-19.7884	3.74441e-87	9.63392e-86
BAK1	1394.34	0.0717807	0.0730971	0.981992	0.326104	0.437209
IKZF2	6261.12	-3.42546	0.233155	-14.6918	7.2799e-49	1.03053e-47
GRN	7559.49	0.614743	0.0489337	12.5628	3.38322e-36	3.6312e-35
FAM13B	1495.32	0.289548	0.0758567	3.81704	0.000135065	0.000370752
ARHGAP31	51.5555	0.870561	0.356669	2.44081	0.0146545	0.0295604
CENPQ	642.494	-1.77906	0.15602	-11.4028	4.04938e-30	3.72844e-29
SARS1	7535.28	-0.846247	0.0580354	-14.5816	3.67926e-48	5.14552e-47
RANBP3	3868.64	-0.0391334	0.0534331	-0.732381	0.463936	0.575842
ARID4A	1421.15	-0.0248698	0.0798654	-0.311397	0.755499	0.823832
EIPR1	1230.13	-0.729141	0.079026	-9.22659	2.79383e-20	1.88393e-19
PNPLA6	3291.52	0.577348	0.0565751	10.205	1.88368e-24	1.46532e-23
IFT88	663.147	-0.445144	0.0904117	-4.92352	8.50012e-07	2.84934e-06
ALG1	401.414	0.588618	0.112679	5.22387	1.75226e-07	6.19604e-07
ZCCHC8	2686.91	-0.286882	0.0596876	-4.80639	1.53683e-06	5.05993e-06
ABCF2	552.288	0.345797	0.103687	3.33502	0.000852925	0.00212217
CHPF2	1889.24	2.40648	0.0783201	30.7262	2.54415e-207	2.61832e-205
LRRC7	136.647	0.251751	0.18764	1.34167	0.179702	0.269381
FUT8	1045.11	-0.358494	0.0774741	-4.62728	3.70502e-06	1.17792e-05
UBA6	5280.77	0.24666	0.0748933	3.29348	0.000989537	0.00244184
GAB2	2858.76	-2.07965	0.0684875	-30.3654	1.57454e-202	1.52223e-200
PIAS1	2960.02	-0.22719	0.0636751	-3.56797	0.000359764	0.000938306
SLC4A7	4426.48	-0.386445	0.205815	-1.87763	0.0604314	0.105723
APBA2	37.4651	0.0782322	0.33901	0.230767	0.817496	0.870388
MAP2K3	2917.52	-0.37556	0.0570536	-6.58259	4.62335e-11	2.05363e-10
TMSB10	16059.4	0.855806	0.056655	15.1056	1.48793e-51	2.21825e-50
ASTE1	290.865	-0.327896	0.139993	-2.34223	0.0191689	0.0377652
RNF19A	1463.74	0.0612716	0.0694097	0.882753	0.377369	0.490982
PEX3	437.176	-0.566223	0.141274	-4.00797	6.12421e-05	0.000174218
GABARAPL2	2242.78	0.212779	0.0615797	3.45535	0.000549579	0.00140017
SH3YL1	2029.36	0.216557	0.0626535	3.45642	0.000547408	0.00139533
FAM136A	1715.37	-0.24866	0.0697775	-3.56361	0.000365787	0.000953041
VCL	6363.1	1.3168	0.0530599	24.8173	5.82897e-136	2.73983e-134
DEPDC1B	1876.2	-1.14138	0.107268	-10.6404	1.93302e-26	1.59613e-25
DAPK2	1334.49	-0.100737	0.0779134	-1.29294	0.196031	0.28971
NSMAF	1992.07	-0.138343	0.0695863	-1.98808	0.046803	0.0840786
ADSS2	1347.17	-1.10153	0.0798755	-13.7906	2.90336e-43	3.64677e-42
STAP1	49.5759	2.87183	0.370707	7.7469	9.41611e-15	5.08414e-14
TIMP2	4589.48	-1.08299	0.054846	-19.746	8.67641e-87	2.21892e-85
RFC1	5476.79	-1.47324	0.0512044	-28.7717	4.84272e-182	3.79143e-180
TBC1D23	1496.66	-0.0173664	0.113572	-0.15291	0.878469	0.916871
CUL3	2436.45	-0.200603	0.0662664	-3.02722	0.00246812	0.00573767
MYOM2	12928.4	5.51227	0.0711878	77.4328	0	0
OTC	1.9484	0.830799	1.65416	0.502248	0.615493	0.709893
CYP46A1	861.352	1.18875	0.0857837	13.8575	1.14525e-43	1.45135e-42
ZZZ3	2166.73	-0.0010578	0.0682377	-0.0155017	0.987632	0.991595
USP2	112.351	1.36882	0.228034	6.00272	1.9404e-09	7.7992e-09
TUBG2	2357.41	0.808511	0.0617325	13.097	3.42422e-39	3.95996e-38
RPL26L1	576.075	-0.230592	0.11462	-2.0118	0.0442415	0.0799756
FLT4	600.983	-0.490728	0.109257	-4.49149	7.0728e-06	2.20711e-05
NSUN2	3554.91	-0.205916	0.0617337	-3.33555	0.000851296	0.00211853
FBXO42	1535.68	0.172712	0.0729021	2.36909	0.017832	0.0353606
MFAP3	1584.41	-0.120148	0.0850516	-1.41265	0.15776	0.241624
MRI1	1358.63	-0.120018	0.0696289	-1.72368	0.0847654	0.142165
METTL1	146.657	0.0242975	0.174956	0.138878	0.889546	0.924625
HOXC8	13.4112	1.21824	0.593667	2.05206	0.0401634	0.0733781
AGA	250.412	0.736784	0.138027	5.33799	9.39828e-08	3.38563e-07
PI4K2B	2911.78	-1.07155	0.270107	-3.96712	7.27468e-05	0.000205003
BOD1L1	3783.61	0.145084	0.0550424	2.63586	0.00839254	0.0177717
MAT2B	3569.44	-0.492781	0.056746	-8.68399	3.82134e-18	2.36728e-17
EDC4	4619.94	0.127193	0.0594241	2.14043	0.0323199	0.0603439
TRIO	3941.03	0.01486	0.0536041	0.277218	0.781613	0.844442
VCAN	3.93548	0.320081	1.14921	0.278523	0.780611	0.843645
CLEC16A	2015	0.316454	0.0688976	4.59311	4.36682e-06	1.38109e-05
MSR1	2483.75	-0.717663	0.063926	-11.2265	3.02344e-29	2.72291e-28
CDH1	12.7137	1.49427	0.782317	1.91006	0.056125	0.0989759
MTREX	2746.93	-0.394954	0.0641463	-6.15708	7.40977e-10	3.06366e-09
ZFYVE16	1580.19	-0.144169	0.0805964	-1.78877	0.0736518	0.125732
RIPOR1	2273.8	0.620934	0.069267	8.96437	3.12074e-19	2.0257e-18
RAI14	902.656	-1.19983	0.0841055	-14.2658	3.57667e-46	4.78697e-45
SOX30	7.34099	0.694552	0.762479	0.910913	0.362341	0.475257
PNKP	1953.44	0.321929	0.0633706	5.0801	3.77235e-07	1.30198e-06
BEST2	5.41993	0.276304	0.898474	0.307526	0.758443	0.826265
PHLPP2	498.318	0.146076	0.101067	1.44533	0.148364	0.229246
SPDL1	1454.48	-1.30897	0.0693543	-18.8737	1.87798e-79	4.36536e-78
STAU2	2089.96	-0.615565	0.088926	-6.92221	4.44648e-12	2.09348e-11
SLC66A1	569.986	0.61524	0.110389	5.57337	2.49851e-08	9.35723e-08
CTNS	1139.4	0.400533	0.0920236	4.3525	1.34592e-05	4.0764e-05
RTN4R	1848.12	-0.930124	0.0690906	-13.4624	2.60422e-41	3.14863e-40
PHF23	1798.3	0.137159	0.067065	2.04517	0.0408384	0.0744727
INPP4A	3622.62	1.78489	0.0789214	22.616	3.01329e-113	1.08474e-111
RAB27B	17.9539	-2.84905	0.642293	-4.43575	9.17519e-06	2.82961e-05
PSMA4	4983.38	-0.512659	0.0592793	-8.64819	5.23248e-18	3.22192e-17
MYO16	11.2835	1.36599	0.656281	2.08141	0.0373961	0.0688645
LSG1	1307.64	0.232839	0.0805741	2.88975	0.00385542	0.00866443
PARP3	735.476	0.163435	0.086621	1.88679	0.0591889	0.103841
THAP3	830.552	0.133827	0.0940088	1.42356	0.154575	0.237392
RIPOR3	4.64953	1.77609	1.07632	1.65015	0.0989123	0.16258
TDP1	2059.44	-1.0378	0.0698814	-14.8509	6.86058e-50	9.94336e-49
AIFM2	252.835	0.331413	0.147956	2.23995	0.0250944	0.0481495
SPATA7	757.473	0.417276	0.08563	4.87301	1.09912e-06	3.65606e-06
MED17	367.8	0.974354	0.118551	8.21885	2.0547e-16	1.18782e-15
RETSAT	1661.36	0.527405	0.0724539	7.27919	3.35835e-13	1.68036e-12
CAPG	1324.73	0.126459	0.0803466	1.57392	0.115506	0.185756
AP2S1	1583.56	-0.875995	0.074347	-11.7825	4.80407e-32	4.648e-31
USH2A	11.4302	-0.854874	0.637702	-1.34056	0.180065	0.269817
TG	56.5557	4.46297	0.458669	9.73028	2.23984e-22	1.62407e-21
ADAM28	145.934	4.42676	0.291764	15.1724	5.38703e-52	8.10213e-51
DCUN1D1	3254.99	0.844464	0.195024	4.33006	1.49069e-05	4.49834e-05
JADE2	2257.65	-1.50235	0.0622831	-24.1214	1.49221e-128	6.46617e-127
ZIC2	1692.45	0.176715	0.0655318	2.69663	0.00700442	0.0150458
LCP2	595.807	-0.634382	0.110569	-5.73743	9.61246e-09	3.70882e-08
TRIT1	1039.76	0.294623	0.0804733	3.66113	0.000251107	0.000667674
ADRB1	77.695	-0.449486	0.247997	-1.81247	0.0699144	0.120115
CUL7	2902.11	1.40286	0.0625442	22.4299	2.00999e-111	7.02752e-110
CTNNA1	10002.8	0.0614906	0.0506037	1.21514	0.224312	0.322597
PHKA2	1767.71	0.0214201	0.0666444	0.32141	0.7479	0.817501
CNTLN	992.511	-1.28728	0.0890511	-14.4555	2.31552e-47	3.19109e-46
HSPA5	11372.9	2.15733	0.0505781	42.6535	0	0
DSG2	1787.08	-0.932956	0.0757236	-12.3206	7.02112e-35	7.26978e-34
GEMIN8	781.298	-0.589572	0.0915146	-6.44238	1.17618e-10	5.09929e-10
OFD1	2808.31	0.128616	0.0610803	2.10569	0.035231	0.0652541
GPM6B	104.167	-0.680054	0.21572	-3.15248	0.0016189	0.00386902
WDR37	4584.4	0.355132	0.0535922	6.62655	3.43622e-11	1.53891e-10
YTHDC2	3944.2	-0.113281	0.0782174	-1.44829	0.147537	0.228231
ATP6V1H	1284.39	-0.546488	0.0811588	-6.73356	1.65562e-11	7.5512e-11
POLR2B	5530.01	-0.0874924	0.0562588	-1.55518	0.119904	0.191724
ATOSA	2055.89	-0.245955	0.0872919	-2.81762	0.00483816	0.0106987
ARAP2	1475.78	0.767177	0.0793301	9.6707	4.01636e-22	2.88353e-21
TPR	7972.39	-0.546346	0.0507941	-10.7561	5.54668e-27	4.65837e-26
CP	15.2963	0.241805	0.517329	0.46741	0.640206	0.731685
KATNIP	1134.87	0.994959	0.0788978	12.6107	1.84259e-36	1.9902e-35
DTNBP1	948.316	-0.766902	0.0838936	-9.14136	6.16745e-20	4.09927e-19
ANO2	132.741	-2.07323	0.212636	-9.75014	1.84206e-22	1.3406e-21
FERRY3	955.396	0.281718	0.0892998	3.15475	0.00160638	0.00384035
WWC3	2629.07	0.292642	0.0623896	4.69057	2.72451e-06	8.76341e-06
ARHGAP6	3.44986	0.247003	1.26537	0.195203	0.845234	0.892919
FAM184B	72.9213	0.0708971	0.248481	0.285322	0.775397	0.839789
MAP4	3664.4	-0.13787	0.061183	-2.2534	0.024234	0.0466494
GOPC	2804.78	-0.0389736	0.0858844	-0.453792	0.649979	0.739114
USP28	3126.54	0.0126703	0.0591862	0.214075	0.830489	0.880805
HDAC9	10507	3.69885	0.2146	17.236	1.42589e-66	2.7058e-65
TSPAN17	1211.36	0.589709	0.0748295	7.8807	3.2554e-15	1.79029e-14
NOP16	431.301	-0.3494	0.117972	-2.96173	0.0030592	0.00698578
CC2D2A	64.6955	0.45129	0.267346	1.68804	0.091404	0.151862
RRM2B	2241.6	0.264536	0.102214	2.58805	0.00965207	0.0201976
ZNF800	1408.09	-0.101991	0.0874782	-1.1659	0.243656	0.345702
TNFRSF17	2.22468	2.41827	1.63943	1.47507	0.140193	0.218633
SNX29	953.338	-0.0621188	0.0789006	-0.787305	0.431103	0.544301
MRPS10	1420.77	-0.0788182	0.0704577	-1.11866	0.263285	0.367183
GUCA1A	2.61509	0.574768	1.50356	0.382272	0.70226	0.781487
RSF1	3140.09	-0.239139	0.0663898	-3.60204	0.000315724	0.000829804
VPS13D	2375.05	0.356099	0.0631876	5.63558	1.74471e-08	6.60978e-08
CELF2	7567.15	-0.663383	0.0585977	-11.321	1.03336e-29	9.42619e-29
FAM120A	3774.81	-0.539322	0.0768809	-7.01503	2.29903e-12	1.10463e-11
R3HDM1	4132.49	-0.237849	0.0590082	-4.03078	5.55928e-05	0.000158944
COL9A2	1662.89	2.62467	0.084886	30.9199	6.4533e-210	6.89153e-208
ERCC8	910.416	-0.149261	0.0903833	-1.65142	0.098653	0.162195
ADAMTS6	700.942	1.31112	0.0984142	13.3224	1.71421e-40	2.03307e-39
H6PD	2767.7	0.484613	0.0653349	7.41737	1.19466e-13	6.09946e-13
VAMP3	1417.47	0.492477	0.0777341	6.3354	2.36724e-10	1.00564e-09
PER3	1109.14	0.911479	0.0811483	11.2323	2.83127e-29	2.55164e-28
UTS2	1.89259	3.18914	1.81929	1.75296	0.0796088	0.134596
TNFRSF9	56.003	7.31112	1.05112	6.95555	3.51182e-12	1.66355e-11
EPN3	46.9448	2.3871	0.347342	6.87246	6.31022e-12	2.94542e-11
LTBP1	538.04	-0.69856	0.0998978	-6.99274	2.69562e-12	1.28767e-11
RCN1	1381.01	0.283443	0.0705064	4.02011	5.81715e-05	0.000166075
ELN	13.2359	0.600232	0.653014	0.919172	0.358006	0.471057
RFC2	3577.35	-1.643	0.0603567	-27.2215	3.61406e-163	2.28887e-161
ARID1B	10396.5	-0.608838	0.0477497	-12.7506	3.09336e-37	3.38995e-36
CLPTM1L	4768.11	-0.647904	0.0595374	-10.8823	1.40007e-27	1.19671e-26
NEDD4L	888.383	-1.01797	0.0845724	-12.0367	2.27837e-33	2.2733e-32
FOXP3	15.1346	0.212654	0.555958	0.3825	0.702091	0.781486
PPP1R3F	378.419	0.224332	0.117794	1.90445	0.0568522	0.100155
HEXB	2874.83	-0.1571	0.0613177	-2.56206	0.0104052	0.0216352
PTCD2	737.821	-0.31179	0.0946846	-3.29293	0.000991483	0.00244617
JKAMP	1602.84	0.26555	0.0668825	3.97039	7.17538e-05	0.000202406
DKK3	9.94066	-2.10235	0.748367	-2.80925	0.00496566	0.010956
ARHGEF5	79.0357	0.848945	0.262259	3.23705	0.00120772	0.0029441
NFE2L3	355.09	0.649181	0.133219	4.87304	1.09892e-06	3.65606e-06
MCUR1	1738.29	-1.08629	0.074557	-14.5699	4.36436e-48	6.09029e-47
LIMA1	1006.56	0.331295	0.0778438	4.2559	2.08212e-05	6.19948e-05
LETMD1	4488.21	-0.438397	0.054207	-8.08745	6.09268e-16	3.45179e-15
SLC4A8	23.171	7.9045	1.27239	6.21233	5.22032e-10	2.17213e-09
LAMC3	35.1212	0.354185	0.360634	0.982115	0.326043	0.437209
PTGER3	6.75447	1.51305	0.932403	1.62274	0.104645	0.170737
MAPK9	3049.1	-0.28886	0.0575132	-5.02249	5.10053e-07	1.74388e-06
COL23A1	14.26	1.8156	0.589986	3.07736	0.00208844	0.00490958
BCAR1	23.5968	7.93112	1.24271	6.38211	1.74662e-10	7.48849e-10
FHIP1B	1349.13	0.679208	0.0761718	8.91679	4.79988e-19	3.09284e-18
HERPUD1	2819.31	1.30101	0.0606506	21.451	4.47078e-102	1.39156e-100
HOMER3	1684.22	1.59462	0.0789684	20.1931	1.1261e-90	3.03501e-89
RAD51	1749.82	-2.20124	0.0737837	-29.8337	1.42865e-195	1.29303e-193
POLQ	2573.77	-1.48158	0.0663105	-22.343	1.41107e-110	4.8603e-109
PIK3CB	780.58	-0.335475	0.0987131	-3.39848	0.000677604	0.00170641
CYBA	7835.8	0.307897	0.0498573	6.17556	6.59306e-10	2.73306e-09
THOC3	1727.62	-1.08768	0.0703654	-15.4576	6.70201e-54	1.03985e-52
HEBP2	189.398	0.819334	0.166106	4.9326	8.11417e-07	2.72641e-06
MPHOSPH9	3251.98	-0.468417	0.066537	-7.03995	1.92304e-12	9.26945e-12
SIKE1	3671.33	-0.0439402	0.0784159	-0.560348	0.575242	0.676181
RRP12	1104.97	0.500227	0.0793717	6.30234	2.93193e-10	1.23976e-09
FNIP2	1006.4	-0.0897786	0.0837497	-1.07199	0.283726	0.390547
MSMO1	2279.83	1.36034	0.0699146	19.4571	2.53765e-84	6.3127e-83
TTC17	5572.42	0.340868	0.0529557	6.43687	1.21965e-10	5.28509e-10
ALX4	2.19243	4.50265	1.77451	2.5374	0.0111678	0.0230948
FOXN3	3012.63	-0.503245	0.058523	-8.59909	8.03494e-18	4.90964e-17
METTL24	5.8525	-0.577632	0.871909	-0.662491	0.507656	0.616116
AKR7A2	1936.69	-0.968569	0.0660889	-14.6555	1.24171e-48	1.75191e-47
MRTO4	962.683	-0.904417	0.0811621	-11.1433	7.7166e-29	6.8457e-28
NNAT	33.6598	1.46743	0.430811	3.40619	0.000658753	0.00166123
USE1	514.541	0.396155	0.113736	3.48311	0.00049563	0.0012702
MCF2L2	622.098	-0.170621	0.0947467	-1.80081	0.0717324	0.122841
NRIP2	88.8904	0.270536	0.255931	1.05707	0.290481	0.397787
LAMA3	9485.52	4.05343	0.0614288	65.9857	0	0
AP5M1	2061.86	-0.322539	0.0887528	-3.63412	0.000278929	0.000737426
ANAPC4	2070.31	0.210123	0.0785278	2.67578	0.00745561	0.0159238
KCNQ1	506.596	-2.1584	0.118105	-18.2753	1.30196e-74	2.83532e-73
TRAPPC3	2176.11	0.267267	0.0652433	4.09647	4.19502e-05	0.000121284
THRAP3	7775.92	-0.583585	0.0488956	-11.9353	7.74523e-33	7.61779e-32
PHPT1	715.74	0.308373	0.0993143	3.10503	0.00190263	0.00450346
ENTPD2	2.06755	-2.48402	3.88861	-0.638795	0.522957	0.629709
LY75	597.435	-0.381865	0.120701	-3.16373	0.0015576	0.00373143
ARID4B	1916.76	0.580844	0.0924021	6.28605	3.25642e-10	1.37219e-09
OPN3	582.47	2.8699	0.11595	24.7511	3.01498e-135	1.40937e-133
SDCCAG8	893.364	-0.264112	0.0852086	-3.0996	0.00193783	0.00458381
PTPRN	1.71823	4.15163	1.8749	2.21432	0.0268067	0.0510436
HHAT	277.178	0.452123	0.135802	3.32927	0.000870729	0.00216478
KIF1B	3190	0.0329089	0.0571866	0.575465	0.564977	0.666743
FOXC1	1.91597	2.15784	1.72788	1.24883	0.211726	0.308053
TBC1D22A	1300.73	-0.425312	0.0725936	-5.8588	4.66212e-09	1.83487e-08
SYNE2	4624.33	-0.451187	0.0558781	-8.07448	6.77646e-16	3.82899e-15
PLEKHH1	93.4795	0.116282	0.215174	0.540407	0.588916	0.68763
ATP9A	551.965	-1.47524	0.106121	-13.9015	6.20267e-44	7.90763e-43
CHRDL2	1.99192	-0.161755	1.47518	-0.109651	0.912686	0.939104
FAM168A	4363.94	-0.163334	0.0528234	-3.09208	0.00198756	0.00468927
RELT	1343.11	-0.1155	0.0703984	-1.64066	0.100869	0.165444
GALC	2.27758	-4.72233	1.7484	-2.70095	0.00691417	0.0148705
NOP58	2513.31	-0.599498	0.0595354	-10.0696	7.52698e-24	5.7398e-23
SZRD1	3844.31	-0.423642	0.0564828	-7.50036	6.36407e-14	3.29607e-13
KCNH2	255.47	0.0599813	0.154319	0.388684	0.69751	0.778049
CUL1	4223.2	-0.18891	0.0533926	-3.53814	0.000402963	0.00104489
FAM114A2	898.347	0.0263	0.0819462	0.320942	0.748254	0.817733
CYFIP2	11687.6	-0.362635	0.0498056	-7.281	3.31342e-13	1.65886e-12
TAB2	3761.23	-0.0135981	0.0563504	-0.241313	0.809312	0.863909
GINM1	917.563	-0.38674	0.0851916	-4.53965	5.63481e-06	1.76875e-05
EIF2AK2	3824.04	-0.999447	0.0571185	-17.4978	1.48961e-68	2.91558e-67
USP36	1825.2	0.289158	0.0656722	4.40305	1.06741e-05	3.26976e-05
KMT2C	3924.52	0.58009	0.0549673	10.5534	4.90131e-26	3.99668e-25
PUM2	7288.55	-0.612611	0.0706695	-8.66867	4.37187e-18	2.69981e-17
MRPL43	1088.13	-0.0435377	0.0781035	-0.557436	0.57723	0.677769
ITIH4	8.89644	1.12088	0.731375	1.53256	0.125384	0.199176
HPF1	896.579	-0.690269	0.0814472	-8.47505	2.34984e-17	1.40919e-16
ZFR	4085.16	-0.0318282	0.0719858	-0.442145	0.658384	0.746146
ZNF280C	816.485	-0.380303	0.0970214	-3.91979	8.86268e-05	0.000247296
TRAF1	965.501	1.7466	0.0859731	20.3157	9.33943e-92	2.57142e-90
RC3H2	3829.47	0.212566	0.0810401	2.62297	0.00871678	0.0184079
IL17RB	60.1719	0.400928	0.27765	1.444	0.148738	0.22974
TRAF3IP2	1354.79	-1.78389	0.0779739	-22.878	7.68924e-116	2.88183e-114
GYG2	735.768	0.175599	0.0919828	1.90904	0.0562567	0.0991876
DCBLD2	849.018	1.09504	0.0860918	12.7195	4.6101e-37	5.03697e-36
SOAT1	2072.04	-0.848413	0.0936862	-9.05591	1.35438e-19	8.91386e-19
MSH4	67.0057	1.27129	0.270582	4.69835	2.62278e-06	8.45367e-06
GDI2	14229.1	-0.947558	0.046667	-20.3046	1.16978e-91	3.20691e-90
PRDM1	18.2145	-0.0586198	0.551625	-0.106267	0.91537	0.940671
ATG5	995.774	-0.174513	0.080004	-2.1813	0.0291609	0.0550214
TMCC3	5.06908	-1.16315	0.951867	-1.22196	0.221721	0.319627
PITHD1	2093.13	-0.481715	0.0683733	-7.04537	1.84964e-12	8.92406e-12
MTA3	2287.18	0.244559	0.0687438	3.55754	0.00037435	0.000974156
USP13	1612.16	-0.203214	0.0667914	-3.04251	0.00234615	0.00547306
ATP11B	4702.86	0.575551	0.0593345	9.7001	3.01196e-22	2.17159e-21
CDK14	2959.46	-0.823155	0.0719468	-11.4412	2.60349e-30	2.41456e-29
SEC61A1	11558.4	0.804149	0.0530252	15.1654	5.99252e-52	9.00749e-51
PPP1R12A	4828.85	-0.268554	0.0736466	-3.64652	0.000265812	0.000704719
RASGRF1	17.9333	1.20245	0.531384	2.26286	0.0236445	0.04563
CAMK2B	43.5674	3.36455	0.427529	7.86975	3.55347e-15	1.95041e-14
CROCC	1392.03	1.06687	0.0707963	15.0695	2.56948e-51	3.8195e-50
POLR3E	2016.11	-0.121854	0.0682032	-1.78663	0.0739967	0.126253
ATP2B4	6499.74	-0.709119	0.0492461	-14.3995	5.21201e-47	7.11369e-46
ZC3H11A	95.605	0.220892	0.255431	0.86478	0.387159	0.501012
RIOK2	1306.01	-0.00308229	0.0745165	-0.0413639	0.967006	0.977555
YIPF1	676.539	0.0443135	0.096445	0.459469	0.645897	0.735816
NDC1	2929.71	-0.642051	0.0614421	-10.4497	1.46991e-25	1.18125e-24
DGKG	367.658	3.10104	0.165194	18.7721	1.27661e-78	2.93275e-77
FLYWCH1	2743.96	0.775439	0.0700525	11.0694	1.76578e-28	1.55087e-27
UNKL	1902.09	-0.0581377	0.070235	-0.82776	0.407807	0.521048
TBXAS1	63.0289	-0.0661037	0.281234	-0.235049	0.814171	0.867826
PARP12	1695.95	0.142851	0.0743565	1.92116	0.0547114	0.0968309
ALDH18A1	3499.79	-0.217898	0.0627233	-3.47395	0.000512861	0.00131186
TARBP1	16132.2	-0.836396	0.04671	-17.9062	1.05571e-71	2.18178e-70
GATB	645.732	-0.916636	0.0991909	-9.24113	2.43906e-20	1.64819e-19
MXD1	630.66	-0.0409649	0.100983	-0.405662	0.684991	0.768046
CDK17	3110.64	0.375048	0.187948	1.9955	0.0459889	0.0827417
DNAJC25	415.194	1.37626	0.155161	8.86987	7.32297e-19	4.66561e-18
SLC2A3	1477.11	1.46293	0.0765844	19.1022	2.41858e-81	5.77483e-80
PSD	1072.51	0.982372	0.0830813	11.8242	2.92607e-32	2.84503e-31
CTDP1	1561.49	0.142596	0.0701126	2.03381	0.0419707	0.0762976
YBX3	4841.08	-1.19076	0.0581016	-20.4945	2.41013e-93	6.76718e-92
STYK1	4.51876	-3.74842	1.35118	-2.77419	0.00553391	0.0121203
WNK1	5895.85	-0.254983	0.051386	-4.9621	6.97334e-07	2.35986e-06
CCAR1	4693.16	-0.056718	0.0575996	-0.984695	0.324774	0.435884
OGFR	5286.93	-0.194719	0.0573283	-3.39656	0.000682385	0.00171744
GNA15	6863.19	-1.47071	0.0514049	-28.6103	5.00896e-180	3.85071e-178
CREB3L3	119.356	-0.301076	0.2002	-1.50388	0.132613	0.208793
PIGV	329.931	-0.00785582	0.136935	-0.057369	0.954251	0.968329
PTPRU	33.3965	0.985045	0.395233	2.49231	0.0126915	0.0259285
SNRNP40	2118.41	-0.88034	0.0696752	-12.6349	1.35561e-36	1.46856e-35
RIMBP2	4.13452	-0.0491209	1.01908	-0.0482013	0.961556	0.97342
COL11A1	11.5615	2.85748	0.73955	3.86381	0.000111632	0.000308855
QSER1	3419.05	-0.864644	0.0832582	-10.3851	2.89886e-25	2.30923e-24
MPC1	1236.74	1.00144	0.0944538	10.6025	2.90226e-26	2.38411e-25
ACAA1	648.741	0.462815	0.118632	3.90125	9.5698e-05	0.000266154
BCAT1	13.0193	2.6838	0.721746	3.71848	0.000200421	0.000539652
HDAC7	11005.9	0.876323	0.0499987	17.5269	8.93166e-69	1.75897e-67
LZTS1	33.572	2.80414	0.452125	6.20214	5.57018e-10	2.31619e-09
PRDM6	95.2485	2.43162	0.250977	9.68865	3.36967e-22	2.42607e-21
WNT8A	27.1358	1.24287	0.436343	2.84837	0.00439435	0.00977914
SPAG4	269.985	0.294357	0.140035	2.10202	0.0355518	0.0657671
NCKAP1	1241.79	0.105372	0.0757678	1.39072	0.16431	0.250146
MRPS35	2143.68	-1.12943	0.0657273	-17.1836	3.52509e-66	6.64483e-65
GUCY1B1	714.866	0.820368	0.0892338	9.19347	3.80352e-20	2.55064e-19
SFSWAP	3739.37	0.391943	0.0600482	6.52713	6.70418e-11	2.9446e-10
TNK2	2493.8	0.045121	0.0646058	0.698404	0.484924	0.595832
MON2	3056.22	0.705984	0.092932	7.59678	3.036e-14	1.5967e-13
CDH3	291.662	1.11417	0.131362	8.48167	2.21983e-17	1.3331e-16
GPBP1	6155.17	0.072139	0.0494665	1.45834	0.144746	0.224635
DGAT2	5.7808	0.0844183	0.922862	0.0914745	0.927116	0.94824
CS	14046	-0.769685	0.0508705	-15.1303	1.02255e-51	1.52802e-50
LTK	98.2994	0.988319	0.218332	4.52667	5.9919e-06	1.8783e-05
MRPS24	16.0102	1.1779	0.540375	2.17978	0.0292736	0.0552176
ELMO2	1497.68	0.639375	0.0719357	8.88815	6.21364e-19	3.9767e-18
WAPL	3504.1	0.305229	0.0623781	4.8932	9.92098e-07	3.30997e-06
VMP1	1854.9	0.559758	0.0640666	8.73713	2.39113e-18	1.49105e-17
APPBP2	2347.08	0.197193	0.0767384	2.56967	0.0101794	0.0212038
POLD1	5150.3	-1.37041	0.0557373	-24.587	1.74183e-133	7.93868e-132
SEZ6	22.2851	2.33898	0.539043	4.33913	1.43046e-05	4.32322e-05
EIF4B	22656.1	-1.17787	0.049564	-23.7647	7.74531e-125	3.23541e-123
SLC6A16	32.1094	-1.48576	0.419262	-3.54376	0.000394457	0.00102471
BICRA	1540.19	0.408313	0.0705522	5.78739	7.14884e-09	2.78225e-08
SPHK2	1602.74	1.56624	0.0750923	20.8575	1.30303e-96	3.83589e-95
RPL18	21291.5	-0.643472	0.0497429	-12.9359	2.82139e-38	3.1863e-37
CA11	230.436	0.156192	0.158013	0.988478	0.322919	0.433805
ISOC2	1071.13	-0.634483	0.075858	-8.3641	6.05778e-17	3.58231e-16
U2AF2	9277.52	-0.377796	0.0526026	-7.18208	6.86595e-13	3.37909e-12
EPN1	3769.26	0.134695	0.0543173	2.47978	0.0131465	0.0267702
MED29	1925.86	0.239729	0.0690245	3.47309	0.000514496	0.00131565
AHRR	8.4903	0.631182	0.741404	0.851333	0.394584	0.508302
GSC2	7.1356	2.83569	1.01766	2.78649	0.00532826	0.0116983
ZNF275	1722.85	0.109864	0.0768698	1.42922	0.15294	0.235235
MTMR1	1213.28	-0.32791	0.0745064	-4.40111	1.077e-05	3.29635e-05
GPC1	1303.11	0.776897	0.0793003	9.7969	1.16092e-22	8.49733e-22
ADCK1	562.833	0.39785	0.102804	3.86999	0.000108842	0.000301429
HAGH	1474.53	0.299185	0.0714972	4.18458	2.85699e-05	8.39789e-05
RNF4	3496.71	-0.423194	0.0573384	-7.38064	1.57526e-13	8.00427e-13
CASP8	1767.35	0.562034	0.067952	8.27105	1.32785e-16	7.72876e-16
LIMCH1	87.1863	3.63759	0.318976	11.404	3.99529e-30	3.68262e-29
INTS13	1260.27	-0.750363	0.0810258	-9.26079	2.02918e-20	1.37595e-19
TM7SF3	4534.19	-0.325064	0.05389	-6.032	1.6194e-09	6.54401e-09
SPA17	83.9212	-0.49291	0.228145	-2.16052	0.0307328	0.0576081
TSPAN32	75.1662	-0.196342	0.268444	-0.731408	0.46453	0.576411
CCN5	6.95362	1.20578	0.805678	1.4966	0.134497	0.211287
ST3GAL6	694.59	3.29705	0.129093	25.54	7.08787e-144	3.69946e-142
ATP2C2	16.0256	0.557397	0.513492	1.0855	0.277699	0.383575
NGFR	385.822	0.201931	0.125286	1.61176	0.107015	0.174026
CDON	74.883	-0.591396	0.31717	-1.8646	0.0622371	0.10851
TAF2	1981.81	-0.0683691	0.0706509	-0.967703	0.333193	0.444751
HIPK2	2750.47	0.00827216	0.0596849	0.138597	0.889769	0.924656
TNPO3	3668.18	-0.871107	0.0557514	-15.6249	4.93069e-55	7.79715e-54
BORCS8-MEF2B	2.71893	2.05904	1.53029	1.34552	0.178457	0.267958
RFXANK	1517.57	0.312013	0.0704771	4.42715	9.54857e-06	2.93978e-05
TMEM161A	2083.95	0.536429	0.0715151	7.50091	6.33752e-14	3.28298e-13
LPAR2	2813.85	0.91947	0.0613521	14.9868	8.96001e-51	1.32189e-49
CTSA	1787.36	0.500716	0.0650422	7.69832	1.37867e-14	7.3769e-14
SUGP2	19801.7	0.163735	0.0452327	3.61985	0.000294779	0.000777396
SLC12A2	1271.74	1.76906	0.23364	7.57171	3.68339e-14	1.92923e-13
SNX24	388.565	0.576939	0.121648	4.74268	2.10904e-06	6.85983e-06
CNN2	4540.04	0.640502	0.0552182	11.5995	4.14659e-31	3.92557e-30
ABCA7	4222.53	0.36327	0.054582	6.65549	2.82351e-11	1.27075e-10
DDX20	1187.83	-0.439629	0.0758742	-5.79419	6.86533e-09	2.67476e-08
BTBD1	3308.68	-0.439296	0.0864195	-5.08329	3.70946e-07	1.28114e-06
FAR2	886.183	0.208935	0.0898065	2.32651	0.0199915	0.0391592
BCAS1	585.764	-0.0800929	0.11651	-0.687433	0.49181	0.602261
CHI3L2	116.44	-0.780688	0.196566	-3.97162	7.13845e-05	0.000201476
SBNO2	3094.48	0.638006	0.0611915	10.4264	1.87919e-25	1.50683e-24
PMS1	2085.67	-0.152676	0.0744418	-2.05095	0.040272	0.0735501
HMG20B	3710.25	-0.61301	0.058592	-10.4624	1.2861e-25	1.03484e-24
CALCRL	1460.58	4.39188	0.11741	37.4063	3.09103e-306	6.92038e-304
TAF11	2340.1	0.0209032	0.0644493	0.324335	0.745684	0.815638
ANKS1A	1396.68	0.332722	0.0750427	4.43377	9.26013e-06	2.85511e-05
AP3D1	7730.57	0.53946	0.0498232	10.8275	2.55068e-27	2.16355e-26
ZNF76	3262.31	0.272454	0.0573418	4.75141	2.02002e-06	6.57951e-06
NHERF2	1148.53	1.01076	0.0769677	13.1323	2.15127e-39	2.49577e-38
NTHL1	811.862	-0.660702	0.0886239	-7.45513	8.97817e-14	4.61624e-13
BLTP3A	1363.42	0.103534	0.0747488	1.38509	0.166025	0.25235
GNAI3	2815.6	-0.0784607	0.059184	-1.32571	0.184937	0.275741
IPO5	10955.2	-1.73228	0.0468943	-36.9402	1.04571e-298	2.24283e-296
OAT	2569.74	-0.0445525	0.0604855	-0.736581	0.461377	0.573419
WDR3	1341.75	-0.731973	0.0731807	-10.0023	1.48952e-23	1.1251e-22
PKN2	3608.14	0.000304807	0.096893	0.0031458	0.99749	0.997998
WDR18	3082.56	-0.576388	0.0614742	-9.37609	6.84628e-21	4.71245e-20
TRAM2	1166.44	-0.869369	0.0759765	-11.4426	2.56106e-30	2.37781e-29
NTN1	363.993	-1.7691	0.124508	-14.2087	8.09178e-46	1.07622e-44
MCM10	3347.72	-1.75462	0.0595075	-29.4857	4.3877e-191	3.79618e-189
DGKA	2528.16	0.309209	0.0608395	5.08238	3.7274e-07	1.28699e-06
ERBB3	561.759	5.00233	0.173119	28.8954	1.36308e-183	1.08718e-181
ANKRD44	2190.29	-1.09092	0.0972645	-11.216	3.40146e-29	3.05473e-28
KARS1	4701.31	-0.762385	0.0547135	-13.9341	3.92938e-44	5.03967e-43
ADAT1	1354.96	0.602994	0.0796966	7.56612	3.84523e-14	2.01193e-13
PDIA5	427.022	0.530288	0.118851	4.46179	8.12789e-06	2.52339e-05
TBC1D22B	997.703	-0.417342	0.0791579	-5.27227	1.34745e-07	4.79449e-07
NDUFB4	3516	-0.471766	0.0636063	-7.41697	1.19827e-13	6.1167e-13
SPEN	6401.74	0.272861	0.0533025	5.11911	3.06988e-07	1.0667e-06
MYLK	7246.91	1.64463	0.0628432	26.1704	5.77339e-151	3.27454e-149
ZC3H15	2057.37	-0.196095	0.0656862	-2.98533	0.00283269	0.00651517
MAP2K4	1465.51	0.377295	0.0707881	5.32992	9.82549e-08	3.53206e-07
PACC1	1276.53	0.649512	0.0803057	8.08799	6.0656e-16	3.43798e-15
SNAP91	2.19214	4.50248	1.77454	2.53727	0.011172	0.0230979
SLK	2542.43	-0.657209	0.0743195	-8.84301	9.31712e-19	5.90956e-18
CYB5R4	1616.22	0.39649	0.0765611	5.17873	2.23396e-07	7.84283e-07
COL17A1	2.19005	4.50132	1.77474	2.53633	0.0112021	0.0231395
GSTO2	66.3787	0.545949	0.265464	2.05659	0.0397258	0.0726669
SEC61A2	1642.21	0.105884	0.0733348	1.44385	0.148782	0.229795
PRKCQ	570.85	-1.0807	0.101632	-10.6334	2.08337e-26	1.71917e-25
TLE2	275.382	-0.344097	0.140837	-2.44323	0.0145563	0.0293808
ASB1	2112.23	-0.531982	0.0639442	-8.31948	8.83502e-17	5.18859e-16
FAM107B	7356.73	-0.357231	0.0530869	-6.72917	1.7063e-11	7.774e-11
ME1	5.79309	-0.0818247	0.832297	-0.098312	0.921685	0.944442
TBC1D1	12849.2	1.32331	0.0491929	26.9004	2.1748e-159	1.35055e-157
CDK13	3877.02	0.044235	0.0605202	0.730913	0.464832	0.576674
MTHFD2	7165.29	-1.81018	0.0640306	-28.2706	7.95719e-176	5.7533e-174
SLC9A7	3384.14	-0.0540091	0.0623431	-0.86632	0.386315	0.500148
FOXJ2	1362.33	-0.450027	0.0919779	-4.89277	9.94268e-07	3.31678e-06
YBX1	26152.9	-1.2768	0.0489994	-26.0574	1.10771e-149	6.21364e-148
PDE4A	3073.44	0.289637	0.0597325	4.84889	1.24153e-06	4.11205e-06
PPP2R5A	2409.7	0.794037	0.0769954	10.3128	6.16907e-25	4.85368e-24
CTNNA2	2.97341	4.94239	1.63981	3.01399	0.00257832	0.00597698
ELAVL1	6203.4	-0.872086	0.053685	-16.2445	2.44394e-59	4.12e-58
TIE1	684.723	1.87323	0.0993787	18.8495	2.96889e-79	6.86989e-78
DIP2B	4387.56	0.17421	0.0545524	3.19344	0.00140588	0.00339217
SMARCD1	7865.23	-0.00440617	0.0517612	-0.085125	0.932162	0.952005
KDM4A	1128.68	0.416727	0.0805434	5.17395	2.292e-07	8.04108e-07
NFYC	2479.22	0.167229	0.0662263	2.52512	0.011566	0.0238314
ZMYND12	117.269	-0.262227	0.199614	-1.31367	0.188958	0.28072
SLC9A3	450.774	-0.260028	0.107471	-2.41952	0.0155412	0.0311985
NGEF	3.51109	2.0045	1.23823	1.61884	0.105482	0.171884
ASPM	6085.34	-1.89876	0.0607124	-31.2746	1.03282e-214	1.13623e-212
CD84	120.849	-0.227654	0.193735	-1.17508	0.239964	0.341299
ELOVL1	2169.98	-0.182449	0.0629564	-2.89802	0.00375521	0.00845112
SPI1	2426.73	-0.778474	0.0600811	-12.9571	2.14282e-38	2.42964e-37
POLR1H	285.199	-0.436763	0.135207	-3.23032	0.00123651	0.0030088
ZBTB11	1978.19	-1.10242	0.205293	-5.36999	7.87411e-08	2.85227e-07
ATXN3	1701.2	-0.180329	0.105374	-1.71131	0.0870232	0.145445
GOLGA5	1132.87	0.532367	0.075052	7.09331	1.30946e-12	6.36233e-12
FGFR2	3.42646	-2.16463	1.24235	-1.74237	0.0814434	0.137306
LRRC40	1906.2	-0.259417	0.281519	-0.921487	0.356796	0.469771
ISOC1	1196.66	-0.232511	0.0835642	-2.78242	0.00539544	0.0118367
EML1	236.607	-0.526519	0.139686	-3.7693	0.000163707	0.000445351
TRMT11	359.52	0.341408	0.120302	2.83794	0.00454064	0.0100862
THUMPD1	2159.69	-0.434136	0.0683359	-6.35297	2.11198e-10	8.99903e-10
MSANTD3	860.133	0.435459	0.0910011	4.78521	1.7081e-06	5.59495e-06
KIF26A	1994.36	-1.19212	0.0635457	-18.76	1.60505e-78	3.67735e-77
ATG2B	2903.84	0.40421	0.0580385	6.96451	3.29537e-12	1.56392e-11
ARFGEF1	2720.96	-0.164021	0.0587025	-2.79411	0.0052043	0.0114409
ZFAT	291.83	-0.638298	0.130658	-4.88526	1.03295e-06	3.44266e-06
MTFR1	849.903	-0.262554	0.116882	-2.24631	0.0246841	0.0474316
STAG3	394.64	1.16982	0.118432	9.87753	5.21019e-23	3.86344e-22
FECH	1274.83	-0.778346	0.082109	-9.47942	2.55703e-21	1.78559e-20
MYO9A	983.501	0.0375006	0.078717	0.476397	0.633791	0.726109
PFKP	4215.06	-1.06808	0.0595074	-17.9487	4.91625e-72	1.0218e-70
IDI1	4438.56	-0.236633	0.0596001	-3.97035	7.17684e-05	0.000202425
SP100	1314.34	0.0411865	0.0703923	0.585099	0.558481	0.661106
KLF6	2846.96	2.08275	0.0609755	34.1572	1.04525e-255	1.54207e-253
PLPP1	215.035	2.34367	0.168428	13.915	5.13954e-44	6.56539e-43
NEO1	1884.59	-0.511898	0.0709967	-7.21017	5.58821e-13	2.76571e-12
TRAM1	7672.79	-0.249379	0.270053	-0.923443	0.355776	0.468815
PHKA1	3.16393	3.00663	1.47623	2.0367	0.0416802	0.0758452
TNFRSF1A	2465.19	-0.332577	0.0607802	-5.4718	4.45485e-08	1.64094e-07
CACNB1	1928.51	1.71111	0.0676868	25.2799	5.31561e-141	2.69187e-139
EVI5	694.82	0.98325	0.101394	9.6973	3.0957e-22	2.23071e-21
STOML1	257.823	0.795038	0.145915	5.44865	5.07523e-08	1.86194e-07
PKM	28177.1	-1.17758	0.0503268	-23.3986	4.41173e-121	1.7649e-119
DHX29	1004.18	0.41892	0.0959174	4.36751	1.25672e-05	3.8162e-05
DNTTIP2	1634.77	-0.260553	0.0652064	-3.99583	6.44693e-05	0.000182889
METTL22	1485.56	0.786923	0.0788475	9.98031	1.85885e-23	1.39828e-22
TP53BP1	2745.27	0.487095	0.0625432	7.78814	6.80039e-15	3.6929e-14
TRO	4461.62	1.77203	0.0604287	29.3243	5.09047e-189	4.30212e-187
RRP15	525.387	-0.244726	0.102608	-2.38506	0.0170765	0.0339893
RHOA	7064.83	-0.930832	0.0505771	-18.4042	1.21515e-75	2.66674e-74
DHX8	3090.47	-0.12611	0.0601008	-2.0983	0.0358785	0.0663004
PRKCZ	16.1826	1.12703	0.525333	2.14536	0.0319242	0.0596662
IARS2	3750.19	-0.43655	0.0596426	-7.31943	2.49033e-13	1.25465e-12
SYT1	1357.34	1.8821	0.0809891	23.239	1.83975e-119	7.26874e-118
NAV3	1521.57	2.18872	0.0822472	26.6115	5.00086e-156	3.01742e-154
IDH3G	2215.01	0.419512	0.0698419	6.0066	1.8946e-09	7.6211e-09
ROGDI	994.56	0.92174	0.0822291	11.2094	3.666e-29	3.28999e-28
PDZD4	39.5843	-0.128501	0.331262	-0.387915	0.698079	0.77848
ATP2B3	17.9015	2.91087	0.684273	4.25396	2.10024e-05	6.25052e-05
ROCK1	5671.88	0.0406435	0.0897702	0.45275	0.650729	0.739664
CBFB	4612.85	-1.36109	0.0997265	-13.6483	2.06749e-42	2.5492e-41
PDK3	768.848	-0.377116	0.104348	-3.61403	0.000301478	0.000793915
HYAL2	267.992	1.20368	0.148092	8.12795	4.36623e-16	2.49194e-15
HDAC4	1661.29	-0.0920347	0.0760228	-1.21062	0.226041	0.324662
RASSF1	458.391	0.241421	0.118001	2.04593	0.0407634	0.0743623
FGFR3	230.514	1.61379	0.156768	10.2941	7.49379e-25	5.88143e-24
IFI35	732.429	0.135584	0.0929473	1.45872	0.144643	0.224516
HEATR6	1031.4	0.548793	0.076536	7.17039	7.47851e-13	3.66995e-12
COASY	2912.91	-0.238234	0.0649485	-3.66804	0.00024442	0.000651591
PLEKHH3	3126.98	0.259834	0.0605306	4.29261	1.76586e-05	5.29239e-05
MEF2A	4196.53	-0.333315	0.0716675	-4.65085	3.30567e-06	1.05529e-05
OTUD5	4226.66	0.505092	0.0528707	9.55336	1.25558e-21	8.87954e-21
TFE3	2141.72	0.389948	0.0694141	5.61771	1.93509e-08	7.30718e-08
TBC1D25	871.749	0.405761	0.0824623	4.92057	8.62937e-07	2.89076e-06
ACSL4	2370.26	-0.0946542	0.0893397	-1.05949	0.289378	0.396668
INPP5A	596.37	-0.528085	0.0999499	-5.28349	1.26744e-07	4.51865e-07
GPKOW	1028.62	-0.106871	0.0795306	-1.34377	0.179022	0.268602
GRIPAP1	5805.68	0.891052	0.0608544	14.6424	1.50705e-48	2.12042e-47
FTSJ1	2101.35	-0.0999945	0.0733708	-1.36287	0.172925	0.261204
PRR11	3585.69	-2.29894	0.0612906	-37.5089	6.60397e-308	1.51776e-305
REEP1	758.688	5.50963	0.170793	32.2591	2.62094e-228	3.23161e-226
ATP11A	3324.66	0.490559	0.0616242	7.96049	1.71361e-15	9.54322e-15
POLR1A	2238.48	0.310447	0.0615069	5.04735	4.4797e-07	1.53759e-06
LAPTM4A	3032.89	0.417757	0.0587193	7.11448	1.12334e-12	5.47367e-12
TTC7A	11580	-2.51343	0.0492218	-51.0634	0	0
IP6K2	2963.1	0.401554	0.0619018	6.48695	8.75892e-11	3.82732e-10
SRBD1	902.289	-0.493697	0.0896459	-5.50719	3.64597e-08	1.35079e-07
KIF2A	3868.98	-0.704001	0.0712839	-9.87601	5.28952e-23	3.91999e-22
RASGRP2	6335.8	-1.60943	0.0526713	-30.5562	4.6806e-205	4.7406e-203
PSME4	4586.34	1.02482	0.0552217	18.5583	6.98776e-77	1.55627e-75
IFT80	1496.57	-0.0658319	0.211366	-0.311459	0.755452	0.823815
SIRT2	2339.81	0.239422	0.0622274	3.84753	0.000119316	0.000329223
ERLEC1	1759.25	0.408092	0.0674019	6.0546	1.40765e-09	5.71545e-09
PPP2R5B	1531.1	1.38028	0.0742303	18.5946	3.55344e-77	7.98367e-76
PYGM	125.596	-0.685472	0.199845	-3.43001	0.00060355	0.00152867
PITX1	242.966	-1.75087	0.15858	-11.0409	2.42515e-28	2.1234e-27
MAST4	292.188	0.693967	0.134471	5.1607	2.46022e-07	8.61111e-07
ADGRF5	33.3055	8.42815	1.22161	6.89921	5.22923e-12	2.45477e-11
SDK2	164.415	-0.935141	0.180439	-5.18259	2.18826e-07	7.68663e-07
NUP133	3370.36	-0.420243	0.0565756	-7.428	1.10252e-13	5.64597e-13
NUCKS1	18242.7	-1.19011	0.0458877	-25.9352	2.66806e-148	1.44887e-146
VPS35	5925.04	-0.452016	0.0516096	-8.75837	1.98085e-18	1.24067e-17
DNAJA2	2467.89	-0.515543	0.066457	-7.75754	8.65902e-15	4.68328e-14
BCL3	1043.38	0.146745	0.0770612	1.90426	0.0568762	0.10019
KCNAB2	3531.94	0.0391777	0.0591097	0.662796	0.507461	0.615924
CLEC2D	1096.28	-1.48201	0.0853242	-17.3692	1.41154e-67	2.7149e-66
FUNDC1	495.052	0.0750231	0.107035	0.70092	0.483353	0.594433
RORA	62.5143	1.20438	0.292148	4.1225	3.74776e-05	0.000108896
DRD4	144.244	-0.513017	0.1855	-2.76559	0.005682	0.0124194
TGFBR3	1016.66	3.44471	0.112907	30.5092	1.96775e-204	1.9542e-202
PLA2G10	13.8269	-1.03278	0.595124	-1.73541	0.0826689	0.139033
ATP1B3	5180.7	-0.53226	0.0513515	-10.365	3.57646e-25	2.83926e-24
NEDD4	1187.35	-0.717926	0.0886952	-8.09431	5.75922e-16	3.26868e-15
PIGB	440.677	0.309803	0.10628	2.91498	0.00355713	0.00804222
MAPK6	1520.16	-0.401335	0.0837318	-4.79311	1.64219e-06	5.39288e-06
GNB5	760.925	-0.845653	0.0891842	-9.48209	2.49239e-21	1.7414e-20
RAB27A	1629.18	-1.6931	0.0833511	-20.3128	9.90468e-92	2.72118e-90
HDHD5	1641.96	-0.383646	0.0800521	-4.79246	1.64752e-06	5.40903e-06
UFD1	3434.66	-0.854131	0.0606981	-14.0718	5.66108e-45	7.45551e-44
LRP6	1144.1	0.210617	0.0860164	2.44856	0.0143427	0.0289909
SCT	14.6662	-0.426378	0.568616	-0.749853	0.453343	0.565798
PHRF1	4119.53	0.272408	0.0576949	4.72154	2.3407e-06	7.58433e-06
ELP1	3879.56	0.119029	0.0572685	2.07843	0.0376694	0.0693077
NUCB2	4335.19	-0.831416	0.0564242	-14.7351	3.83607e-49	5.46057e-48
PFN2	1946.22	0.533737	0.0655743	8.13943	3.97146e-16	2.27018e-15
PTPN3	8.96086	-1.24722	0.835823	-1.49221	0.135645	0.212801
SPTB	94.8022	-0.873656	0.226009	-3.86557	0.000110829	0.000306765
DAPP1	2.61413	0.571933	1.32619	0.431259	0.66628	0.752521
SLC44A1	2622.38	-1.29212	0.0776502	-16.6403	3.55887e-62	6.23425e-61
TMEM260	804.479	0.772853	0.0875288	8.82969	1.04963e-18	6.64265e-18
SMG6	998.758	0.126761	0.0905582	1.39977	0.161582	0.246521
EXOC5	3733.82	-0.415214	0.0923891	-4.49419	6.98351e-06	2.18004e-05
CLTCL1	1119.74	0.242795	0.0794392	3.05637	0.00224038	0.00524261
FGF22	20.5199	1.23093	0.494918	2.48715	0.0128771	0.0262783
FSTL3	559.091	-0.245736	0.10055	-2.44392	0.0145288	0.02933
DGCR2	3773.47	0.489934	0.0560682	8.73817	2.36921e-18	1.47775e-17
RNF126	2566.44	-0.252526	0.0630002	-4.00833	6.11492e-05	0.000174012
MNT	1152.86	-0.469184	0.0782916	-5.99277	2.06295e-09	8.28393e-09
ZXDC	1745.9	0.130431	0.0673662	1.93614	0.0528502	0.0938559
JMJD6	1346.57	-0.00035313	0.0921117	-0.00383372	0.996941	0.997762
POLB	1132.08	0.512057	0.075504	6.78186	1.18638e-11	5.4578e-11
WIPI1	455.572	1.16755	0.118856	9.82324	8.94208e-23	6.56206e-22
GBA2	2820.57	1.07813	0.0625075	17.248	1.15877e-66	2.20383e-65
NDST1	4221.8	0.386063	0.0585578	6.59285	4.31468e-11	1.92054e-10
ASNS	360.532	-0.464447	0.118898	-3.90627	9.37306e-05	0.000260825
AP3M2	1519	-0.859754	0.0741179	-11.5998	4.12896e-31	3.91033e-30
ST6GALNAC2	7.12059	1.08828	0.801596	1.35764	0.174578	0.263062
CHAT	14.0736	0.447147	0.589346	0.758717	0.448022	0.560917
PABPC1	52693.4	-0.806401	0.0457345	-17.6322	1.39435e-69	2.78685e-68
TESK2	1239.86	0.937851	0.0765693	12.2484	1.71361e-34	1.75719e-33
CFAP20	1582.02	-0.75405	0.0699627	-10.7779	4.37846e-27	3.69061e-26
CSNK2A2	1677.77	-0.8032	0.0756221	-10.6212	2.3742e-26	1.95663e-25
PTPN21	28.4162	1.65935	0.418225	3.9676	7.25997e-05	0.000204657
EIF2B3	652.486	-0.259698	0.0965661	-2.68933	0.0071595	0.0153414
CAMK2A	12.9748	3.0446	0.750279	4.05795	4.95045e-05	0.000142174
TCOF1	3934.66	-0.508077	0.064416	-7.88744	3.08447e-15	1.69837e-14
CDC42	233.844	1.71863	0.151012	11.3808	5.21333e-30	4.78632e-29
OSBPL3	1107.25	0.757219	0.0763988	9.9114	3.71405e-23	2.77094e-22
EPHA8	3.70267	-0.972918	1.06206	-0.916067	0.359632	0.472627
RAD18	2098.26	-1.45191	0.0708532	-20.4918	2.55039e-93	7.14529e-92
ATP2B1	1072.3	-0.379833	0.109969	-3.454	0.000552334	0.00140677
NCK2	2082.62	1.77612	0.0744871	23.8447	1.15067e-125	4.84631e-124
MAP4K4	10546.8	0.47447	0.0535961	8.8527	8.54308e-19	5.42265e-18
MGAT4A	1230.25	-0.580821	0.0923175	-6.29156	3.1429e-10	1.32589e-09
RPL31	18687.6	-0.937614	0.0469765	-19.9592	1.24681e-88	3.26718e-87
WDR1	7535.02	0.217955	0.0534042	4.08124	4.47964e-05	0.000129162
SNX13	2449.12	0.997089	0.0742942	13.4208	4.5658e-41	5.4839e-40
ARHGAP10	266.099	0.275588	0.134498	2.04902	0.0404601	0.0738511
RPS6KA2	856.147	1.24757	0.0840461	14.8439	7.62182e-50	1.10279e-48
ING3	855.558	0.34343	0.0917484	3.74317	0.000181711	0.000491605
VASH1	316.222	0.387101	0.123152	3.14328	0.00167063	0.00398538
BUD23	1614.49	-0.191155	0.0703406	-2.71757	0.00657632	0.0142099
SEL1L	2945.43	0.444585	0.0594963	7.47248	7.86969e-14	4.05446e-13
TRIP13	1495.43	-1.49006	0.0723301	-20.6008	2.70105e-94	7.67693e-93
ATP6AP1	5009.66	1.15387	0.06298	18.3212	5.60229e-75	1.22631e-73
TCF3	24192.7	-0.819261	0.0464988	-17.619	1.76201e-69	3.51128e-68
DAZAP1	9977.45	-0.700037	0.0475293	-14.7285	4.2272e-49	6.00729e-48
MBD3	2986.28	-0.00183064	0.0591065	-0.030972	0.975292	0.983111
HLTF	3287.03	-0.506609	0.0800118	-6.33169	2.42497e-10	1.02966e-09
FAM50A	3100.52	0.904396	0.0624966	14.4711	1.84441e-47	2.54597e-46
FAM3A	1322.93	0.824214	0.0720556	11.4386	2.68239e-30	2.48593e-29
CPSF1	7890.15	-0.283958	0.0521898	-5.44087	5.30214e-08	1.94323e-07
MYO3B	8.48023	1.94117	0.832524	2.33167	0.0197181	0.0386948
CYBRD1	182.233	-1.24962	0.186851	-6.68776	2.26616e-11	1.02515e-10
CDH19	39.5547	8.67627	1.21596	7.1353	9.65778e-13	4.71852e-12
PDCD2	2146.61	-0.679714	0.0647246	-10.5016	8.49049e-26	6.87291e-25
RDH11	2794.63	0.372396	0.0597503	6.23254	4.58934e-10	1.91653e-09
PRKACA	4981.47	-0.349438	0.0534232	-6.54094	6.11339e-11	2.69299e-10
ADGRL1	3787.48	0.739462	0.0556664	13.2838	2.87374e-40	3.38939e-39
ACTN1	6577.39	0.0632879	0.0579204	1.09267	0.274539	0.380033
ZFYVE26	942.804	0.124869	0.0866885	1.44043	0.149745	0.23103
EPN2	412.319	-0.567006	0.122688	-4.62151	3.80956e-06	1.2101e-05
PTPN18	3836.37	-0.424047	0.0543024	-7.809	5.76452e-15	3.13839e-14
LIMS2	207.863	0.437169	0.169935	2.57256	0.010095	0.0210382
ASIC4	62.8453	1.91941	0.312078	6.15042	7.72763e-10	3.19094e-09
SPEG	2819.56	1.17133	0.0591493	19.803	2.80385e-87	7.22856e-86
ALDH3A2	1805.48	-0.395123	0.0682804	-5.78677	7.17515e-09	2.79206e-08
TFRC	6844.25	0.0524646	0.0495555	1.0587	0.289735	0.396913
SREBF1	10755	0.374378	0.0490016	7.64011	2.17034e-14	1.15115e-13
AFF4	4138.31	0.625686	0.0789599	7.9241	2.29802e-15	1.27256e-14
UBE2D1	1323.66	1.28578	0.117302	10.9613	5.86644e-28	5.08245e-27
PALS1	995.276	-0.453024	0.0956062	-4.73844	2.15372e-06	7.00156e-06
RHOBTB1	586.829	0.213218	0.100786	2.11556	0.0343826	0.0638076
SMC1A	9039.13	-1.50166	0.0493926	-30.4025	5.09705e-203	5.00354e-201
HSD17B10	1542.92	-0.535045	0.0692441	-7.72694	1.10159e-14	5.92786e-14
MARK2	2528.91	0.147818	0.0623492	2.37082	0.0177489	0.0352067
HMMR	1689.62	-2.26318	0.0897507	-25.2162	2.65822e-140	1.33818e-138
CHFR	265.725	0.809188	0.134817	6.0021	1.9478e-09	7.82768e-09
P4HA2	714.546	1.96835	0.110734	17.7755	1.09381e-70	2.22803e-69
NFATC3	750.086	-1.21387	0.101163	-11.9992	3.58721e-33	3.56528e-32
TRNT1	1749.76	0.201336	0.0681041	2.95629	0.00311359	0.00710299
ACADVL	13590.6	0.616896	0.0503548	12.251	1.66006e-34	1.70365e-33
STK10	3761.14	0.225376	0.0606211	3.71778	0.000200984	0.000541074
FBXW11	3669.93	0.202142	0.0550506	3.67194	0.00024072	0.000642264
ACAP1	7966.48	-0.105098	0.050736	-2.07147	0.0383145	0.0703576
CRMP1	10487.4	-0.884089	0.0559109	-15.8125	2.55256e-56	4.12858e-55
EVC	829.263	-0.121507	0.0900531	-1.34929	0.177245	0.266437
DERL2	1583.3	0.476058	0.0727761	6.5414	6.09448e-11	2.68513e-10
SIDT1	265.988	-0.17501	0.135916	-1.28763	0.197873	0.291909
NDE1	1695.04	-0.899581	0.0674522	-13.3366	1.41839e-40	1.68536e-39
IRAG1	307.931	-2.88426	0.161741	-17.8326	3.94641e-71	8.10984e-70
TMEM38A	648.623	0.0608578	0.107614	0.565521	0.571719	0.672876
AP1M1	4194.94	-0.335645	0.0566191	-5.92813	3.06412e-09	1.21759e-08
XRCC1	2213.01	-0.417254	0.0676576	-6.16714	6.95351e-10	2.87968e-09
SCARB1	3275.17	-0.97766	0.0598976	-16.3222	6.86415e-60	1.16485e-58
CYP2W1	82.4073	0.434484	0.248689	1.7471	0.0806208	0.136063
MCM2	7920.04	-2.30576	0.0580481	-39.7216	0	0
MOV10L1	9.50959	-1.48645	0.690929	-2.15138	0.0314466	0.0588554
PANX2	391.532	-0.553206	0.116787	-4.73686	2.17053e-06	7.05083e-06
SELENOO	3611.71	-0.379966	0.0581812	-6.53074	6.54468e-11	2.87851e-10
TP63	2754.18	3.72934	0.0732105	50.94	0	0
ALPK1	1048.31	0.429921	0.0797554	5.3905	7.02633e-08	2.55278e-07
LLGL2	1303.78	-0.0811513	0.0712098	-1.13961	0.25445	0.357105
PDE8A	1725.75	-0.458236	0.0709213	-6.46119	1.0388e-10	4.51676e-10
CLCN4	2.53101	2.63696	1.79475	1.46926	0.141763	0.220757
NLE1	1422.15	-1.58285	0.0773537	-20.4625	4.65054e-93	1.30006e-91
SDHA	779.004	0.28535	0.0932418	3.06033	0.00221097	0.00517964
SMARCE1	870.177	0.637402	0.111968	5.6927	1.25045e-08	4.78919e-08
FNDC8	4.32678	-0.387804	0.976367	-0.397191	0.691227	0.773135
GSDMB	1587.57	0.167857	0.0675638	2.48443	0.0129761	0.0264612
KDM5A	2145.03	0.194449	0.0669583	2.90403	0.00368395	0.00830613
ADAM11	1725.11	1.12439	0.0733023	15.3391	4.18741e-53	6.41508e-52
PPP2R3A	57.9246	-0.652293	0.286483	-2.2769	0.0227922	0.0441537
FERMT2	951.704	0.773235	0.0940199	8.22416	1.9657e-16	1.13714e-15
CD5L	2.3429	-0.577145	1.39525	-0.413651	0.67913	0.763352
IGF2BP2	702.942	1.57723	0.0991088	15.9142	5.0523e-57	8.25016e-56
MAP3K13	147.532	-0.157443	0.191937	-0.820288	0.412052	0.525289
ST6GAL1	3023.78	-0.563654	0.0579475	-9.72697	2.31374e-22	1.67623e-21
TBX21	59.3232	0.00429218	0.281923	0.0152247	0.987853	0.991696
VDAC1P1	2.30432	0.250009	1.54877	0.161425	0.871759	0.911892
FRY	236.537	3.12302	0.175505	17.7945	7.79438e-71	1.59149e-69
PICALM	4393.58	0.414574	0.0589106	7.03734	1.95938e-12	9.44105e-12
NSF	1086.5	-0.130992	0.0762469	-1.718	0.085796	0.143667
CLASP1	4815.54	0.117516	0.0524936	2.23867	0.0251776	0.0483018
MRPS34	1296.29	-0.93367	0.0849395	-10.9922	4.16711e-28	3.62746e-27
NOTCH3	12.3189	1.88128	0.724669	2.59605	0.00943015	0.0197786
CLNS1A	3218.1	-1.36318	0.0646807	-21.0755	1.33597e-98	4.01624e-97
PPP2R2C	3.68372	-0.697292	1.21058	-0.576	0.564615	0.666549
TEAD2	9.93374	0.764507	0.661952	1.15493	0.24812	0.350399
EED	1039.51	-0.793143	0.0927019	-8.55584	1.17015e-17	7.10242e-17
CDHR2	52.7467	-0.200304	0.309496	-0.647196	0.517505	0.624623
SNCB	7.34515	-0.562788	0.809892	-0.694893	0.487123	0.597732
TSG101	1562.79	-0.174106	0.0706676	-2.46373	0.0137499	0.0278899
NCBP3	5783.5	-0.0156778	0.0494422	-0.317094	0.751172	0.8202
ATP2A3	11066.4	-0.699768	0.0504203	-13.8787	8.5282e-44	1.08615e-42
CA12	2.30041	0.24923	1.40212	0.177752	0.858918	0.902964
MGLL	12.2541	1.32006	0.649749	2.03165	0.0421895	0.0766298
NTN4	54.9504	3.3506	0.412283	8.12694	4.40251e-16	2.5114e-15
BCS1L	1425.75	0.244901	0.0758737	3.22774	0.00124772	0.00303321
NUAK1	2.1475	0.062009	1.56121	0.0397186	0.968317	0.978244
DPP8	3008.65	-0.333621	0.0674746	-4.94439	7.63814e-07	2.57527e-06
SLC24A1	481.378	0.491309	0.103472	4.74823	2.052e-06	6.67686e-06
ZNF532	57.3038	3.94026	0.41581	9.47612	2.63911e-21	1.84139e-20
SCARF1	2515.92	1.01283	0.0604338	16.7594	4.83583e-63	8.5831e-62
LMAN1	8585.73	0.417888	0.0831841	5.02366	5.06964e-07	1.73425e-06
HACD3	4555.82	-0.177231	0.0523445	-3.38586	0.000709544	0.00178122
IPCEF1	102.926	3.98015	0.307858	12.9285	3.10644e-38	3.50511e-37
ZZEF1	3798.09	0.252511	0.0571364	4.41945	9.89532e-06	3.04324e-05
NOX3	2.06564	2.29398	1.83018	1.25342	0.210054	0.30632
ENO1	28238.1	-1.51873	0.0507483	-29.9266	8.86554e-197	8.1394e-195
SLC12A1	6.56431	-1.0042	0.931623	-1.07791	0.281075	0.387485
MYDGF	1331.29	0.386515	0.0724848	5.33236	9.69459e-08	3.48647e-07
ANO8	3338.47	1.09759	0.0567438	19.3428	2.34254e-83	5.75443e-82
TUBE1	1257.29	-0.220328	0.0891915	-2.47027	0.013501	0.027446
ARHGEF10L	11.2615	6.86372	1.30369	5.26485	1.40306e-07	4.98751e-07
TXK	176.545	3.1817	0.223595	14.2297	5.99138e-46	7.9811e-45
KCNQ2	4.68569	-0.576968	1.05016	-0.549407	0.582726	0.6824
TACR2	2.49704	-0.357035	1.28404	-0.278055	0.78097	0.843962
ACTR6	1376.41	-0.517867	0.10216	-5.06917	3.99558e-07	1.37661e-06
TIPIN	452.883	-1.34091	0.12633	-10.6143	2.55601e-26	2.10374e-25
SRI	1649.83	0.0925104	0.0697869	1.32561	0.184968	0.275772
EIF4G3	3754.28	0.447495	0.0568641	7.86954	3.55938e-15	1.95284e-14
NUP37	826.349	-1.37418	0.0923662	-14.8775	4.61524e-50	6.70431e-49
SEMA3A	1366.25	3.52307	0.103066	34.1825	4.39736e-256	6.602e-254
GTSE1	3117.03	-1.4452	0.0635315	-22.7478	1.50778e-114	5.52916e-113
TTC38	8.295	0.835433	0.747795	1.11719	0.263911	0.367896
ACAT1	1332.48	-1.07578	0.0760257	-14.1502	1.86341e-45	2.46807e-44
GRAMD4	3724.39	0.175529	0.0575471	3.05017	0.0022871	0.00534607
CELSR1	31.5999	1.72007	0.402139	4.27731	1.89168e-05	5.65488e-05
WNT8B	180.573	0.24277	0.160112	1.51625	0.129455	0.204536
ZNF638	5764.32	0.386638	0.0528895	7.31029	2.66573e-13	1.34117e-12
SLC25A40	2319.69	-1.24005	0.0919415	-13.4873	1.85683e-41	2.25033e-40
TIMM21	1004.27	-0.599441	0.0864107	-6.93712	4.00179e-12	1.88899e-11
ADD2	4.83768	5.6452	1.4905	3.78744	0.000152205	0.000415346
RASAL2	14.2446	-0.678239	0.636322	-1.06587	0.28648	0.393566
VPS9D1	874.838	1.87435	0.0952885	19.6703	3.87557e-86	9.83261e-85
ZNF37A	1700.04	-0.21501	0.0740056	-2.90532	0.00366873	0.00827548
MARK3	4880.89	0.269439	0.0614228	4.38663	1.15122e-05	3.51213e-05
SLC25A3	16922.3	-0.888509	0.0526099	-16.8886	5.45576e-64	9.84081e-63
FNDC3B	2011.47	1.81234	0.0842819	21.5033	1.44999e-102	4.54088e-101
FOSL2	1877.65	4.14041	0.0930227	44.5096	0	0
CACNG5	44.8313	2.91205	0.419298	6.94507	3.78285e-12	1.78895e-11
CACNG4	1.94965	0.83484	1.50224	0.55573	0.578396	0.678456
FRYL	4298.79	0.482818	0.0527193	9.15826	5.27397e-20	3.51455e-19
TMEM131	4308.38	0.0835549	0.0561468	1.48815	0.136711	0.214236
FSCN1	4183.61	0.1171	0.0570361	2.05309	0.0400642	0.0732129
ACTB	92485.8	-0.0293911	0.0449321	-0.654124	0.513032	0.620927
MOCOS	2.72488	-1.74921	1.48894	-1.1748	0.240074	0.341417
PLD1	1250.25	-0.496934	0.0724681	-6.85728	7.01844e-12	3.26942e-11
WDR62	4148.04	-0.889975	0.0639907	-13.9079	5.67409e-44	7.241e-43
DLG1	2712.49	0.182149	0.0603937	3.01603	0.00256105	0.00593801
RAB7A	6106.24	-0.231645	0.052257	-4.43281	9.30113e-06	2.86637e-05
BCAP29	45.2501	-0.153414	0.309361	-0.495908	0.61996	0.714045
SEC31B	4472.7	0.8528	0.0551565	15.4614	6.31612e-54	9.81171e-53
SART3	3266.62	-0.492549	0.0601575	-8.18766	2.66346e-16	1.53383e-15
ARHGAP15	1532.08	-1.06492	0.0698769	-15.2399	1.92086e-52	2.91649e-51
TUBA3D	54.6468	-0.737763	0.290029	-2.54375	0.0109669	0.0227124
EXOSC7	467.213	-0.442473	0.1216	-3.63875	0.000273965	0.000725354
KIFAP3	968.492	0.511239	0.0815078	6.27227	3.55822e-10	1.49615e-09
MKRN2	630.289	-0.106754	0.0923976	-1.15537	0.247938	0.350295
MCM6	9297.94	-2.33201	0.0531024	-43.9154	0	0
REXO2	567.898	-0.42602	0.108526	-3.92551	8.65453e-05	0.000241832
RBM7	868.382	-0.729508	0.246217	-2.96286	0.00304791	0.0069631
RBMS2	978.758	0.825629	0.0825579	10.0006	1.51466e-23	1.14307e-22
BAZ2A	10464.4	0.0966698	0.0541498	1.78523	0.0742241	0.12659
PTPN23	1240.73	0.160259	0.0721776	2.22034	0.026396	0.0503875
MLH1	776.191	-0.552437	0.0946297	-5.83789	5.28668e-09	2.07141e-08
UNG	3676.78	-2.31665	0.0623118	-37.1784	1.52646e-302	3.32989e-300
FMO4	64.3592	1.8446	0.278854	6.61492	3.71761e-11	1.66202e-10
KLHL20	1799.29	1.69501	0.0835941	20.2767	2.06562e-91	5.63858e-90
RGS11	8.2367	1.23664	0.750444	1.64787	0.0993792	0.163267
SLC46A1	7.26397	0.100769	0.931945	0.108128	0.913894	0.939666
PLXNA2	56.7341	9.19671	1.20662	7.6219	2.49977e-14	1.32204e-13
SPAG5	4337.52	-0.934139	0.0605884	-15.4178	1.24296e-53	1.92034e-52
ANKRD13A	3266.9	-0.235311	0.0646229	-3.6413	0.000271268	0.000718586
ACACB	403.173	-0.44073	0.129029	-3.41573	0.00063611	0.00160747
TRAF4	1862.43	0.617058	0.06437	9.5861	9.14754e-22	6.50161e-21
PAG1	8617.07	-2.4578	0.087061	-28.2308	2.44976e-175	1.76127e-173
GPATCH1	882.99	-0.0897981	0.0816282	-1.10009	0.271294	0.376393
ICAM3	73.3144	-0.190312	0.239867	-0.793408	0.42754	0.540578
NT5C2	2784.03	0.00331021	0.0626601	0.0528281	0.957869	0.970877
MCAM	123.563	1.98751	0.215697	9.21437	3.13119e-20	2.10697e-19
GPC4	1270.28	0.49663	0.0842709	5.89325	3.78668e-09	1.49771e-08
MBNL3	3052.45	-1.78159	0.0906691	-19.6494	5.85068e-86	1.47995e-84
CAMSAP3	2.65028	-0.160969	1.49934	-0.10736	0.914503	0.940133
RAP1GAP	451.452	-0.508245	0.114432	-4.44146	8.93515e-06	2.75991e-05
XAB2	4069.78	0.0227395	0.0530055	0.429002	0.667922	0.75394
ARHGEF1	10576.3	-0.0308202	0.050262	-0.613191	0.53975	0.644976
STXBP2	272.157	0.93259	0.136944	6.81	9.75973e-12	4.51182e-11
MAP2K7	2636.89	0.044238	0.0598629	0.738988	0.459914	0.572269
DGKD	23845.2	0.0686881	0.0503384	1.36453	0.172401	0.260564
ACTL6B	14.8056	0.788063	0.575429	1.36952	0.170836	0.258619
RARB	44.8916	-0.686651	0.325827	-2.10741	0.035082	0.0650111
TOP2B	68118.4	-0.972625	0.0423346	-22.9747	8.34978e-117	3.1713e-115
TM9SF3	9036.89	-0.14659	0.0918744	-1.59554	0.11059	0.179076
NFKB2	3390.79	0.47475	0.0619771	7.66009	1.8581e-14	9.88623e-14
UBE2T	1832.75	-1.29672	0.0674785	-19.2168	2.67905e-82	6.46288e-81
PPP1R12B	1343.06	0.161654	0.0712896	2.26757	0.0233556	0.0451185
DNAJC10	5734.31	1.60795	0.0702491	22.8892	5.95476e-116	2.23834e-114
GTF3C1	6407.04	0.464189	0.0502667	9.23454	2.59406e-20	1.75201e-19
IL4R	413.866	-0.733715	0.108859	-6.74002	1.58362e-11	7.23441e-11
USP33	4032.24	0.115903	0.0666631	1.73863	0.0820997	0.138221
SNRPA	5771.02	-1.42691	0.0538262	-26.5095	7.52271e-155	4.4445e-153
SPAG6	364.2	4.23249	0.181717	23.2917	5.38105e-120	2.14594e-118
EXOSC5	695.448	-1.5872	0.110854	-14.3179	1.69067e-46	2.27709e-45
DYNC1I2	3190.43	0.0514476	0.0587887	0.875126	0.381505	0.495652
APBB1IP	18283.3	-0.975674	0.0459612	-21.2282	5.2399e-100	1.59592e-98
LRCH4	1618.99	-0.0261138	0.0765484	-0.341141	0.732998	0.805618
FAM76B	2977.02	-1.12418	0.276153	-4.07087	4.6837e-05	0.000134893
SIRT6	1477.99	0.355151	0.071839	4.94371	7.66512e-07	2.58369e-06
POLD3	2203.75	-1.15138	0.0699569	-16.4584	7.30039e-61	1.25558e-59
ACTN2	35.5173	-1.22576	0.377038	-3.25103	0.00114987	0.00281058
CAPZB	6398.26	-0.0762191	0.0509628	-1.49558	0.134762	0.211651
GPR137B	670.051	0.085969	0.0989792	0.868557	0.38509	0.499144
NAALAD2	191.279	0.511767	0.170387	3.00357	0.00266835	0.00616832
JADE1	1502.94	-1.13381	0.0760923	-14.9005	3.27318e-50	4.77379e-49
SLC25A43	419.61	-0.530785	0.132397	-4.00905	6.0964e-05	0.000173506
UBE2A	3275.5	-0.30167	0.0631277	-4.77872	1.76413e-06	5.77033e-06
FGFR1	5597.7	-1.16049	0.0543535	-21.3508	3.83683e-101	1.18413e-99
SMC1B	18.4167	0.703085	0.481156	1.46124	0.143949	0.223603
FBLN1	1.71935	4.1524	1.91664	2.1665	0.0302731	0.0568341
ITGA8	4.377	5.50046	1.4916	3.68763	0.000226351	0.000605635
CST7	17.567	-0.634144	0.60643	-1.0457	0.2957	0.403658
PIAS2	2620.83	-0.254431	0.0734385	-3.46455	0.000531125	0.001356
ARAF	1958.83	0.09014	0.0650142	1.38647	0.165604	0.251785
MCCC1	1379.54	-0.314444	0.0860195	-3.6555	0.000256685	0.000681866
LAMP3	11.433	-0.853006	0.770351	-1.1073	0.268166	0.372769
NEBL	22.8943	0.104008	0.542919	0.191573	0.848077	0.894959
ACER3	1119.42	-0.0658113	0.0814822	-0.807677	0.419277	0.532292
UBE2K	4609.36	-0.338881	0.0754887	-4.48915	7.15063e-06	2.23003e-05
PIK3C3	5039.87	-1.35574	0.0513061	-26.4246	7.15618e-154	4.20846e-152
N4BP2	1835.63	-0.31613	0.199283	-1.58634	0.112663	0.181844
TIGAR	558.998	2.80214	0.131501	21.3089	9.38874e-101	2.88362e-99
TULP3	1459.21	-0.0194629	0.0706209	-0.275597	0.782858	0.845215
SYNJ2	777.515	-1.21271	0.0946862	-12.8077	1.48565e-37	1.64504e-36
PPP2R5C	6638.74	-0.508119	0.0506098	-10.0399	1.01741e-23	7.71461e-23
GNB1	23186.9	-0.488643	0.0472016	-10.3523	4.0872e-25	3.23767e-24
HOXA9	447.547	-0.153688	0.106958	-1.4369	0.150745	0.232377
EDN1	28.4293	3.40394	0.541285	6.28863	3.2028e-10	1.35049e-09
MLLT10	3293.06	-0.0661969	0.059256	-1.11713	0.263937	0.367912
ZCWPW1	199.205	0.711779	0.15588	4.56622	4.96607e-06	1.565e-05
FGF20	19.8718	7.68296	1.25836	6.10554	1.02455e-09	4.19737e-09
P2RY10	10.4887	-1.23443	0.805005	-1.53345	0.125166	0.198867
ITM2A	18.407	1.25602	0.510682	2.45949	0.0139135	0.0281994
NRDC	6491.97	-0.0233011	0.0525786	-0.443166	0.657646	0.745573
VDAC3	4489.66	-0.0324342	0.0566013	-0.57303	0.566624	0.668112
PCM1	7551.39	-0.320808	0.0488838	-6.56267	5.28539e-11	2.33915e-10
TNRC6C	583.63	-0.854921	0.100478	-8.5085	1.76195e-17	1.06137e-16
CBFA2T2	2648.68	0.421451	0.0588965	7.15578	8.31998e-13	4.07583e-12
ITCH	2531.79	1.08439	0.0786345	13.7903	2.91655e-43	3.66154e-42
PKD2L2	13.402	-0.0572131	0.549047	-0.104204	0.917007	0.941577
TP53INP2	2402.68	1.02106	0.0710551	14.37	7.97944e-47	1.0856e-45
SDF4	4238.16	0.489237	0.0573425	8.53185	1.44026e-17	8.70669e-17
MYH7B	367.344	1.83884	0.124963	14.715	5.1633e-49	7.32535e-48
BPIFB2	4.21062	1.00408	1.10108	0.911903	0.36182	0.474744
TP73	4.25018	0.512496	1.01639	0.504232	0.614098	0.708921
TOLLIP	1421.25	0.237283	0.0761292	3.11685	0.00182797	0.00433801
UBE2D4	321.538	-0.174842	0.133898	-1.30578	0.191626	0.284072
CLUL1	18.0047	-2.1654	0.606552	-3.57002	0.000356951	0.000931255
CDH17	2.06662	2.29113	1.82973	1.25217	0.210509	0.306756
THOC1	3174.05	-0.677003	0.0748061	-9.0501	1.42838e-19	9.39118e-19
FKBP7	1000.71	0.430915	0.0900719	4.78412	1.71738e-06	5.62246e-06
OSBPL6	23.3487	6.03612	1.09523	5.51129	3.56207e-08	1.32047e-07
SLC1A3	62.7024	-0.179288	0.264763	-0.677163	0.498302	0.60781
XRCC5	17878.7	-0.739452	0.0441989	-16.7301	7.91011e-63	1.39813e-61
LXN	157.288	-0.799246	0.178903	-4.46749	7.91442e-06	2.46071e-05
SP140	55.4711	2.48505	0.360741	6.88873	5.62919e-12	2.63573e-11
MKNK1	1220.97	0.62935	0.0731342	8.60542	7.60387e-18	4.65292e-17
TNS1	10185.9	-1.9391	0.0496788	-39.0326	0	0
REXO1	2281.18	0.217244	0.0635343	3.41931	0.000627792	0.00158771
SAR1A	4036.76	0.598916	0.0583317	10.2674	9.88105e-25	7.73364e-24
CDC14A	542.346	-0.659035	0.0996456	-6.61379	3.74608e-11	1.67416e-10
RAPGEF3	220.514	0.677971	0.156152	4.34173	1.41365e-05	4.27344e-05
CEACAM1	155.744	0.808893	0.180698	4.4765	7.58764e-06	2.36199e-05
SENP1	2116.88	-0.748419	0.0691216	-10.8276	2.54851e-27	2.16242e-26
DUSP13B	32.3606	1.16261	0.402922	2.88546	0.00390848	0.00877285
CIC	4373.65	0.401901	0.0534136	7.52432	5.29948e-14	2.7542e-13
LIPE	796.299	-0.709306	0.0913841	-7.76182	8.37215e-15	4.53486e-14
FDFT1	7486.89	-0.23684	0.0497186	-4.76361	1.90159e-06	6.20484e-06
PAFAH1B3	599.27	-0.69293	0.103579	-6.68989	2.2334e-11	1.01087e-10
OPHN1	1.95371	0.835324	1.80486	0.462818	0.643495	0.73403
KIF22	5978.44	-1.31399	0.056773	-23.1447	1.64515e-118	6.41054e-117
CARMIL1	412.118	1.75342	0.12003	14.6082	2.48994e-48	3.48797e-47
PGM1	577.384	-1.04388	0.102026	-10.2315	1.43349e-24	1.11989e-23
DDX1	3902.3	-0.1457	0.0647557	-2.25	0.0244489	0.0470134
DNM2	14031.4	0.111019	0.0472319	2.35052	0.0187473	0.0370061
EPB41L2	12902.9	0.427473	0.047708	8.9602	3.24103e-19	2.10218e-18
MOXD1	668.415	-0.415478	0.0946159	-4.39121	1.12721e-05	3.44383e-05
STX7	2689.69	0.375367	0.0763035	4.9194	8.68084e-07	2.90686e-06
RABL2B	1018.57	0.459963	0.0797175	5.76991	7.93159e-09	3.07703e-08
KEAP1	3120.38	-0.530064	0.0565632	-9.37119	7.17167e-21	4.9311e-20
DDX43	20.6527	-0.397325	0.457969	-0.86758	0.385624	0.499583
PTPRH	10.3942	3.79003	0.919901	4.12004	3.78811e-05	0.000110006
DCT	77.239	0.150629	0.314961	0.478248	0.632474	0.724892
SLC35C2	1801.47	0.910109	0.0708266	12.8498	8.62124e-38	9.59615e-37
CRYBG3	363.651	6.47928	0.503478	12.869	6.7227e-38	7.50912e-37
EPHA6	2.92788	0.835666	1.28065	0.652532	0.514058	0.621697
SCTR	3.96712	2.71075	1.23773	2.1901	0.0285173	0.0539426
RFX3	1636.64	-0.103339	0.112191	-0.921101	0.356998	0.469988
RIF1	5768.5	-1.09699	0.0805876	-13.6124	3.38038e-42	4.15195e-41
RAB21	2388.12	-0.186083	0.0822091	-2.26354	0.0236025	0.0455575
SLC4A4	2249.98	5.38558	0.108812	49.4943	0	0
SMARCA2	7674.12	-0.722723	0.0525331	-13.7575	4.59291e-43	5.7435e-42
SESN1	1104.32	0.285003	0.0827477	3.44424	0.000572665	0.00145478
SRCAP	202.06	0.339809	0.166285	2.04353	0.0410004	0.0747574
PUM3	1102.57	-0.713558	0.0797964	-8.94223	3.81379e-19	2.46554e-18
CPB2	10.238	0.834215	0.671525	1.24227	0.214137	0.310659
CHRNA3	48.7201	-0.654506	0.322379	-2.03024	0.0423325	0.0768731
CNOT4	1333.98	0.0225655	0.0788864	0.286051	0.774839	0.839363
PSEN1	2384.82	0.530458	0.0599489	8.84851	8.86966e-19	5.62715e-18
CPOX	1215.45	-0.774468	0.282902	-2.73759	0.00618915	0.0134382
CLDND1	2621.82	0.153316	0.0685943	2.23511	0.0254101	0.0486954
MOK	223.882	1.46944	0.156778	9.37274	7.06726e-21	4.86193e-20
HSP90AA1	21816.4	-0.693674	0.0472563	-14.679	8.79073e-49	1.24302e-47
RBL1	1693.4	-1.40765	0.0926327	-15.196	3.75945e-52	5.68103e-51
DLGAP4	3519.6	1.60546	0.0636581	25.2201	2.41094e-140	1.2161e-138
CROCCP3	26.0744	1.4929	0.431433	3.46032	0.000539532	0.0013765
NDC80	2357.03	-1.61606	0.0612411	-26.3885	1.85603e-153	1.089e-151
AP4E1	1477.8	0.631807	0.0713604	8.85375	8.463e-19	5.37584e-18
RSBN1	3724.01	-0.0353478	0.0935773	-0.377739	0.705624	0.783728
MAGI3	1048.72	0.260651	0.0885303	2.94421	0.00323785	0.00736867
CXCL2	3.15782	3.00187	1.53789	1.95194	0.0509455	0.0907447
COL4A4	11.0695	-0.786653	0.622391	-1.26392	0.206259	0.30208
TCF7	13.1342	-0.27158	0.656543	-0.413651	0.67913	0.763352
OSTM1	717.501	0.79958	0.140135	5.70579	1.15803e-08	4.44659e-08
CDH7	7.73529	1.42144	0.786429	1.80747	0.0706897	0.121283
IMPG2	90.0472	0.891247	0.234065	3.80769	0.000140273	0.000384304
PCNP	6534.17	-0.595005	0.254812	-2.33507	0.0195398	0.0383863
ARG2	3.81813	-0.292483	1.29412	-0.226009	0.821194	0.873233
MEF2C	11910.7	-0.639785	0.0553803	-11.5526	7.16418e-31	6.73485e-30
PTPRC	6536.3	-1.08767	0.0600664	-18.1078	2.76554e-73	5.87228e-72
UBA5	2284.95	0.0819463	0.08443	0.970583	0.331756	0.443274
STK17B	3856.94	-0.525254	0.0916255	-5.73262	9.88892e-09	3.81319e-08
CDC14B	501.301	6.14039	0.39687	15.472	5.35958e-54	8.35119e-53
ZNF510	1382.31	0.0594705	0.0738488	0.805301	0.420646	0.533633
ZNF506	856.247	0.805846	0.100477	8.02021	1.05567e-15	5.92822e-15
JMJD4	140.342	0.701517	0.206683	3.39417	0.000688365	0.00173095
DUSP12	796.643	-0.093595	0.0923612	-1.01336	0.310889	0.420188
AACS	974.408	0.363583	0.0843332	4.31127	1.62319e-05	4.88142e-05
DELE1	3981.83	0.024617	0.0575753	0.427562	0.66897	0.754824
PCDHGA2	25.3211	0.251239	0.421074	0.596663	0.550732	0.654053
IFT25	1110.21	-1.15748	0.0783094	-14.7808	1.94717e-49	2.792e-48
PHLPP1	6064.3	0.89499	0.049909	17.9324	6.58295e-72	1.36599e-70
ATP8B1	28.9972	1.08559	0.395354	2.74586	0.00603528	0.013132
IL12RB2	32.2685	-0.312761	0.377633	-0.828215	0.407549	0.52077
SMARCD3	165.804	1.58996	0.204526	7.7739	7.6108e-15	4.12947e-14
WDR70	1378.13	-0.37869	0.0797954	-4.74576	2.07726e-06	6.75819e-06
FYB1	197.851	1.92769	0.167698	11.495	1.39728e-30	1.30441e-29
STRADB	1742.59	0.629184	0.0666073	9.44617	3.51451e-21	2.44284e-20
BZW1	5352.52	-0.41328	0.0532897	-7.75536	8.80964e-15	4.76273e-14
C1QTNF3	307.222	-0.251965	0.12805	-1.96771	0.0491019	0.0877733
ME2	4552.86	0.444377	0.0734966	6.04623	1.48279e-09	6.00623e-09
C5orf22	1304.1	-0.16275	0.0757744	-2.14783	0.0317273	0.059346
CCNT2	4757.69	0.255028	0.170116	1.49914	0.133837	0.210471
FAM135A	1037.17	-0.668297	0.0802392	-8.32881	8.16573e-17	4.8077e-16
EPB41L3	27.8019	8.16779	1.2436	6.56789	5.10339e-11	2.26017e-10
COBLL1	182.578	1.50165	0.180312	8.32805	8.2183e-17	4.83642e-16
DLG3	3435.39	-0.498317	0.0605217	-8.23369	1.81535e-16	1.05111e-15
TRAF5	1496.77	0.226786	0.0685106	3.31023	0.000932189	0.00230746
MRPL22	1136.13	-0.524378	0.0773991	-6.77498	1.24424e-11	5.71783e-11
GEMIN5	1413.64	-0.642041	0.0734746	-8.73827	2.36697e-18	1.47671e-17
OPRK1	18.1833	1.50693	0.518223	2.90788	0.00363889	0.00821397
NFE2L1	4445.23	0.550144	0.0643094	8.55464	1.18237e-17	7.17321e-17
SEMA5B	6.27493	-1.40634	0.933172	-1.50705	0.131798	0.207788
GSK3B	3110.14	0.175676	0.0596637	2.94444	0.00323542	0.0073638
ITGB5	23.3258	1.54238	0.574688	2.68386	0.00727772	0.0155804
ERC1	1464.52	-0.092511	0.0719925	-1.28501	0.198789	0.293074
XPO1	10929.7	-0.73026	0.0473379	-15.4265	1.08529e-53	1.67878e-52
RNF13	770.463	-0.650853	0.106614	-6.10474	1.0297e-09	4.21712e-09
TRPM3	2.38375	2.53572	1.59368	1.59111	0.111585	0.180373
PALB2	814.392	-0.660865	0.0896427	-7.3722	1.67831e-13	8.51601e-13
DOP1A	1048.93	0.522424	0.0858301	6.08672	1.15249e-09	4.70491e-09
LYRM2	972.656	-0.0348227	0.0869746	-0.400378	0.688878	0.77132
BCKDHB	1527.47	-0.371251	0.102072	-3.63715	0.000275669	0.000729564
KAT6A	4409.86	-0.556272	0.0553145	-10.0565	8.59847e-24	6.54125e-23
TUT7	1834.19	1.24374	0.0659284	18.865	2.212e-79	5.12779e-78
ULK2	3.74354	-1.58008	1.13535	-1.39172	0.164007	0.249743
TNPO1	6500.68	-0.649133	0.189664	-3.42255	0.000620371	0.00156972
PLOD1	1549.36	1.30313	0.0723069	18.0222	1.30358e-72	2.73388e-71
P2RX5	1095.3	-1.49739	0.0838496	-17.858	2.50449e-71	5.17169e-70
ITGAE	1077.97	-0.517288	0.0832046	-6.21707	5.06537e-10	2.11041e-09
DIS3	3034.21	-0.246227	0.062636	-3.93107	8.45671e-05	0.000236771
PIBF1	752.769	-0.137015	0.0907361	-1.51004	0.131034	0.206762
TDRD3	822.482	0.35457	0.0950638	3.72981	0.000191623	0.000516942
NUFIP1	368.403	-0.489937	0.121761	-4.02375	5.72779e-05	0.000163597
PDS5B	5423.02	-0.477651	0.0682299	-7.00061	2.54851e-12	1.21991e-11
OXCT1	1739.75	-1.21103	0.0713093	-16.9828	1.10188e-64	2.02034e-63
RRAGB	944.052	0.208915	0.0870882	2.39888	0.0164452	0.0328556
CYLD	1661.98	0.229117	0.0828975	2.76385	0.00571232	0.0124782
SLC27A5	204.06	-0.407338	0.152117	-2.67779	0.00741092	0.015839
ZNF324	609.238	0.248995	0.100718	2.4722	0.0134284	0.0273028
ZNF671	906.791	0.400258	0.0939139	4.26197	2.02633e-05	6.03901e-05
ZNF416	224.985	-0.0496172	0.148131	-0.334954	0.73766	0.809115
ZNF586	874.654	0.191018	0.0856209	2.23097	0.0256828	0.0491565
ZNF446	279.527	0.162037	0.142117	1.14016	0.254219	0.3569
ZNF264	492.656	-0.282354	0.109463	-2.57945	0.00989576	0.0206516
RPS5	20283.7	-1.3497	0.0466407	-28.9383	3.94042e-184	3.17259e-182
FAT1	12.6973	0.837446	0.625656	1.33851	0.180731	0.270667
YTHDC1	4583.16	0.307948	0.0589623	5.22279	1.76247e-07	6.22953e-07
CHMP2B	1068.46	0.136068	0.103276	1.31752	0.187664	0.27909
SMAP2	2808.39	-0.805685	0.0599916	-13.43	4.03613e-41	4.85916e-40
PPIE	2482.77	-0.117809	0.0625581	-1.88319	0.0596744	0.104556
ZMPSTE24	1450.93	0.344607	0.0898851	3.83386	0.000126146	0.000347315
STARD7	5131.74	-0.808307	0.0584455	-13.8301	1.67817e-43	2.12039e-42
NOA1	1893.74	-1.41219	0.0688219	-20.5195	1.44117e-93	4.05992e-92
REST	3520.32	0.0831888	0.089159	0.933039	0.3508	0.463622
HAL	26.0721	0.405786	0.422349	0.960782	0.336662	0.448443
SSH1	1789.86	0.774177	0.0655997	11.8015	3.83264e-32	3.71658e-31
GSTP1	5106.77	-0.701939	0.057835	-12.1369	6.73019e-34	6.7922e-33
APLP2	5198.54	-0.303665	0.05262	-5.77091	7.88463e-09	3.05928e-08
FAM234B	1182.98	-0.787491	0.0809855	-9.72386	2.38572e-22	1.7274e-21
SLCO1A2	1.88105	4.28156	2.01809	2.12159	0.0338722	0.0629383
WBP11	4727.29	-0.923125	0.0541964	-17.033	4.67727e-65	8.63181e-64
EIF3I	5773.91	-0.694184	0.0532794	-13.0291	8.35675e-39	9.59034e-38
TXLNA	4782.12	0.173864	0.0602122	2.88752	0.00388289	0.00872231
NCOA1	1628.72	1.24944	0.0714991	17.4749	2.22509e-68	4.33849e-67
AGBL5	2929.26	-0.695905	0.0594943	-11.697	1.32043e-31	1.26792e-30
EFR3B	932.513	2.06424	0.0921449	22.4021	3.75322e-111	1.30331e-109
KIF3C	1916.18	0.889279	0.0658979	13.4948	1.67834e-41	2.03691e-40
RAB10	4796.1	-0.223061	0.0714047	-3.12389	0.00178474	0.00424253
HADHA	7265.32	-0.350648	0.0576049	-6.08712	1.14959e-09	4.69381e-09
MAPRE3	31.0283	0.613158	0.368087	1.6658	0.095754	0.15806
CAD	7473.53	-1.09693	0.0511587	-21.4417	5.46107e-102	1.69566e-100
CD59	1326.3	-1.17238	0.0715416	-16.3873	2.35548e-60	4.02672e-59
CD82	214.743	0.660095	0.153083	4.31201	1.61775e-05	4.86563e-05
BCORL1	1301.79	-0.0272943	0.0888557	-0.307175	0.75871	0.82645
ATRX	6474.38	-0.259699	0.18087	-1.43583	0.151051	0.232785
AK6	631.346	-0.907307	0.101924	-8.90182	5.49374e-19	3.52835e-18
MYNN	656.821	0.13731	0.109504	1.25393	0.209866	0.30609
MECOM	503.306	-0.565333	0.107544	-5.25676	1.46619e-07	5.20683e-07
SCAMP1	2454.91	-0.641925	0.258356	-2.48465	0.0129678	0.0264486
PREP	1774.66	-0.193833	0.0702475	-2.75928	0.00579287	0.0126423
HACE1	2494.73	0.412375	0.0956308	4.31215	1.61672e-05	4.86369e-05
SEH1L	2016.64	-0.994104	0.0689623	-14.4152	4.15387e-47	5.68772e-46
WDR47	1556.35	0.323071	0.0747958	4.31937	1.56473e-05	4.71117e-05
WDFY1	2164.62	-0.0242482	0.20848	-0.11631	0.907407	0.93605
OVGP1	435.418	0.524853	0.112363	4.67107	2.99633e-06	9.59901e-06
SLC25A24	2761.67	-0.390145	0.0895364	-4.35739	1.31622e-05	3.99023e-05
MAP3K4	1894.03	-0.509943	0.069342	-7.35402	1.92335e-13	9.7265e-13
PILRA	188.15	0.95124	0.164259	5.79109	6.99332e-09	2.72297e-08
ZNF213	703.51	0.328415	0.0906541	3.62273	0.000291515	0.000769267
AKR1B1	5915.13	-1.01029	0.0543694	-18.5819	4.5002e-77	1.00842e-75
CPNE3	3562.26	-0.648537	0.0927697	-6.99083	2.73268e-12	1.30513e-11
RRN3	2417.74	0.130623	0.0627546	2.08148	0.0373897	0.0688576
CTTN	141.829	6.64645	0.537389	12.368	3.89188e-35	4.04778e-34
WNT11	250.738	3.22781	0.177223	18.2133	4.04685e-74	8.70892e-73
MTIF2	1083.32	-0.489721	0.0763603	-6.4133	1.42407e-10	6.14275e-10
DDHD2	2612.48	0.32127	0.060069	5.34836	8.87567e-08	3.20053e-07
TTC39A	23.6725	1.93521	0.473525	4.08681	4.37336e-05	0.000126211
EPS15	4450.27	0.0809264	0.077208	1.04816	0.294565	0.402321
ORC1	3065.67	-2.50018	0.0610426	-40.9579	0	0
MGST2	137.636	1.03148	0.216887	4.75582	1.97639e-06	6.44068e-06
CHERP	2308.5	-0.428843	0.0648544	-6.6124	3.78133e-11	1.68932e-10
ATG16L1	1295.4	0.226543	0.0729818	3.1041	0.00190862	0.00451638
USP40	8.86371	-1.75055	0.740882	-2.36279	0.0181378	0.0358861
POMGNT1	2819.39	1.05787	0.0603641	17.5247	9.27562e-69	1.8239e-67
RAD54L	2533.04	-1.82828	0.0742956	-24.6082	1.03138e-133	4.75162e-132
MAST2	5975.32	1.81136	0.0559929	32.3498	1.39576e-229	1.75488e-227
DNAJA1	4984.8	-0.184135	0.0604165	-3.04776	0.00230552	0.00538664
B4GALT1	1789.65	-0.791722	0.066309	-11.9399	7.33229e-33	7.21999e-32
CHMP5	1686.56	0.0720983	0.0931401	0.774084	0.438881	0.551638
NFX1	2756.19	0.155914	0.0642568	2.42642	0.0152484	0.0306566
AQP6	261.114	-0.592131	0.141521	-4.18405	2.86356e-05	8.41528e-05
DIMT1	558.407	-0.258647	0.0985304	-2.62505	0.00866356	0.0183061
IPO11	953.135	-1.10254	0.112562	-9.7949	1.1841e-22	8.66452e-22
EIF2AK1	9160.94	-0.0112396	0.0499231	-0.225138	0.821872	0.873808
EPDR1	741.951	-1.11352	0.10274	-10.8382	2.26784e-27	1.92555e-26
SNX10	3.55353	1.25234	1.16958	1.07075	0.28428	0.391226
SEPHS1	4054.12	-0.947012	0.0560162	-16.9061	4.05995e-64	7.34389e-63
MRPL28	2538.52	0.0546737	0.0693136	0.788787	0.430237	0.543422
HBQ1	2.67076	3.72882	1.67328	2.22845	0.0258504	0.0494253
ITPKC	442.471	1.14299	0.123792	9.23315	2.62798e-20	1.77444e-19
RBM22	3781.84	-0.0655161	0.0570646	-1.14811	0.250925	0.353462
TMED2	5758.45	-0.263392	0.0505011	-5.21557	1.83251e-07	6.47174e-07
ERO1B	3337.9	0.598022	0.0770774	7.75871	8.57946e-15	4.64123e-14
ZFAND6	2540.42	0.325405	0.0641673	5.0712	3.95311e-07	1.36327e-06
TXLNG	945.416	-0.512485	0.081812	-6.26419	3.74776e-10	1.573e-09
PPEF1	53.986	1.39216	0.307138	4.53269	5.82361e-06	1.82667e-05
LAT2	10122.8	-0.620915	0.0535456	-11.596	4.31777e-31	4.08611e-30
HUWE1	12977.3	-0.35386	0.0480072	-7.37098	1.69377e-13	8.59273e-13
ZW10	1150.28	-0.681947	0.0751855	-9.07019	1.18807e-19	7.83338e-19
ALG9	437.997	-0.0139681	0.112332	-0.124347	0.901041	0.931969
MYBPC2	11.0235	0.224931	0.620444	0.362532	0.716954	0.792809
ACOX3	871.635	-0.226422	0.086318	-2.62311	0.00871303	0.0184015
MTMR2	1953.08	-0.370017	0.0646602	-5.72248	1.04982e-08	4.04253e-08
PPP1R15A	2154.05	2.18427	0.0678792	32.1787	3.50284e-227	4.19733e-225
HSD17B14	1066.66	1.51979	0.0809697	18.7698	1.33277e-78	3.05901e-77
TRIP6	3327.57	0.349393	0.0650512	5.37104	7.82843e-08	2.83653e-07
ACHE	954.313	6.14291	0.182937	33.5793	3.36323e-247	4.71647e-245
FTL	9334.66	-0.0887974	0.0503774	-1.76264	0.0779608	0.132239
SRRT	7897.65	0.422564	0.0518205	8.15438	3.50964e-16	2.01069e-15
BAX	4270.3	0.716701	0.0568875	12.5986	2.15051e-36	2.31593e-35
NLK	1773.4	0.280607	0.0677598	4.1412	3.45496e-05	0.000100686
PIGS	3199.38	-0.508405	0.0626305	-8.11752	4.75792e-16	2.70701e-15
TMPRSS11E	5.4686	5.82181	1.43353	4.06116	4.88298e-05	0.000140395
ATXN7L3	3975.34	0.590839	0.0601046	9.83017	8.34781e-23	6.13125e-22
PGS1	1278.29	0.372136	0.0760466	4.89353	9.90449e-07	3.30491e-06
PSMC5	3552.91	-0.343563	0.0601121	-5.71538	1.09458e-08	4.20992e-08
UIMC1	1858.95	-0.810457	0.0782841	-10.3528	4.06541e-25	3.2224e-24
CETP	23.1326	-1.10074	0.478774	-2.29908	0.0215004	0.0418683
OGFOD1	1417.89	-0.235238	0.0765358	-3.07357	0.00211514	0.00496778
SH3BP2	517.481	1.79712	0.115748	15.5261	2.31001e-54	3.61265e-53
NOP14	1333.43	-0.985258	0.0809587	-12.1699	4.49711e-34	4.5638e-33
ADD1	6234	0.332194	0.0522053	6.36323	1.97561e-10	8.44048e-10
L2HGDH	924.06	-0.737091	0.0818317	-9.00739	2.1101e-19	1.37739e-18
TXNDC16	1481.05	-0.547937	0.0843937	-6.49263	8.43505e-11	3.68959e-10
RTRAF	4699.48	-0.456511	0.0572511	-7.97385	1.53805e-15	8.58046e-15
NID2	2757.36	0.711696	0.0617924	11.5175	1.07632e-30	1.0059e-29
GMCL1	2284.38	-0.783706	0.0983993	-7.96455	1.65832e-15	9.24336e-15
SF3B2	14416.6	-0.0272622	0.054045	-0.504436	0.613955	0.708856
KLHL42	1224.5	0.145598	0.0736027	1.97816	0.0479106	0.0858302
GNAS	53388.4	0.887189	0.043411	20.437	7.84741e-93	2.18418e-91
DNM1L	3732.22	-0.115034	0.0612455	-1.87824	0.060348	0.105606
PTHLH	28.1142	0.89887	0.41058	2.18927	0.0285774	0.0540362
PHACTR3	7.18802	2.04598	0.894746	2.28666	0.0222157	0.0431416
ERGIC2	1152.83	-0.62206	0.0903458	-6.88533	5.76552e-12	2.69858e-11
AURKA	2327.45	-2.07359	0.0740538	-28.0011	1.57546e-172	1.09268e-170
CASS4	46.997	-1.20293	0.335993	-3.58024	0.000343283	0.000897338
AAMDC	150.971	0.0192396	0.195688	0.0983176	0.92168	0.944442
RFX2	480.344	-1.96406	0.13705	-14.3309	1.40248e-46	1.89594e-45
METTL2A	959.735	-0.320957	0.0782239	-4.10305	4.0774e-05	0.000118031
SULT2B1	55.694	-0.164516	0.286298	-0.574633	0.565539	0.667202
ALG6	1243.89	0.00108564	0.0741013	0.0146507	0.988311	0.991925
CNOT3	4069.39	0.0852758	0.0567061	1.50382	0.132628	0.208793
GP6	55.9096	-0.985163	0.319073	-3.08758	0.00201793	0.00475653
PTPN4	1522.17	0.587724	0.0797451	7.37003	1.7059e-13	8.65084e-13
DDX18	2610.89	-0.208177	0.0585462	-3.55576	0.000376882	0.000980546
KHSRP	14504.6	-0.565863	0.0499252	-11.3342	8.88286e-30	8.12316e-29
GNA11	2156.18	-0.180502	0.0620919	-2.90702	0.00364892	0.00823588
ASAP3	811.921	1.10564	0.0910046	12.1493	5.78629e-34	5.85116e-33
EDEM2	1129.24	-0.0983683	0.082615	-1.19068	0.233778	0.334101
DNMT3B	1128.71	-1.46039	0.0812926	-17.9646	3.68712e-72	7.70101e-71
TPX2	7534.83	-2.00278	0.0557045	-35.9536	4.44248e-283	8.46159e-281
FER1L4	650.791	0.468917	0.105494	4.44498	8.79e-06	2.71738e-05
PDRG1	1007.75	-0.377822	0.0811379	-4.65653	3.21576e-06	1.02749e-05
EPB41L1	762.261	0.654387	0.0979298	6.6822	2.35383e-11	1.06313e-10
SLC15A1	2.6914	-0.90194	1.37842	-0.654328	0.5129	0.620825
DOCK9	1354.31	1.50757	0.0732989	20.5675	5.37105e-94	1.51979e-92
ANKRD10	9187.7	0.268568	0.0505039	5.31776	1.05051e-07	3.76997e-07
TGDS	631.667	-0.0787717	0.108092	-0.728746	0.466157	0.578064
DOCK3	6.02952	0.720657	0.850333	0.847499	0.396717	0.510482
C3orf18	90.9296	1.35292	0.240913	5.61578	1.9568e-08	7.38807e-08
COQ9	1389.24	0.261396	0.0726993	3.59558	0.000323669	0.000849024
KIF9	54.0016	-0.928674	0.311867	-2.97779	0.00290335	0.00666326
CRLS1	230.84	0.226618	0.14906	1.52032	0.128432	0.203221
PPP1R13B	1442.66	-0.0831004	0.072541	-1.14556	0.251975	0.354315
ATRN	1833.7	0.830885	0.0643136	12.9193	3.5044e-38	3.95066e-37
SMOX	566.804	0.501723	0.101641	4.93624	7.96448e-07	2.67823e-06
SIGLEC1	11.7045	-0.580142	0.67801	-0.855655	0.392189	0.506058
FKBP1A	8676.76	-0.676681	0.0551718	-12.265	1.39663e-34	1.43677e-33
NSFL1C	1787.71	0.201396	0.0717723	2.80605	0.00501534	0.0110608
SLC4A11	499.883	-0.358703	0.110122	-3.25732	0.00112471	0.00275331
DNAAF9	1302.15	0.947139	0.0739663	12.805	1.53697e-37	1.69966e-36
ZNF343	698.009	0.399262	0.0901657	4.4281	9.50687e-06	2.92836e-05
EBF4	3356.71	0.803249	0.0601557	13.3528	1.14034e-40	1.35877e-39
CPXM1	16179.3	0.62405	0.0480858	12.9778	1.63423e-38	1.86042e-37
MAVS	6753.07	-0.135681	0.0534011	-2.54079	0.0110602	0.0228853
LZTS3	438.598	0.525559	0.118372	4.4399	8.9999e-06	2.77823e-05
XRN2	4862.7	-0.651911	0.0542535	-12.016	2.92709e-33	2.91373e-32
KIZ	2027.06	0.77984	0.0645179	12.0872	1.23438e-33	1.2384e-32
DYNLL1	2929.55	0.0536855	0.0625637	0.858094	0.390841	0.504831
TESC	17.0738	-1.20706	0.516082	-2.33889	0.0193409	0.0380659
SNX5	15339.6	1.13476	0.0487406	23.2816	6.80963e-120	2.71142e-118
RPL6	27967.5	-1.0825	0.0491131	-22.0411	1.16371e-107	3.88252e-106
MAPKAPK5	2111.24	0.123801	0.0628304	1.97039	0.0487932	0.0872704
P2RX7	561.949	1.35369	0.108456	12.4814	9.42566e-36	9.97807e-35
ESF1	605.051	-0.717701	0.142526	-5.03559	4.76382e-07	1.63248e-06
RBBP9	957.163	-0.326551	0.0855533	-3.81692	0.000135125	0.000370879
ANAPC5	10419.9	-0.0625491	0.0489452	-1.27794	0.20127	0.296201
SLC23A2	2083.79	0.35221	0.0611166	5.76292	8.26699e-09	3.20325e-08
SLC8B1	1257.09	-0.199432	0.0840334	-2.37324	0.0176327	0.0350011
TMEM230	3960.17	-0.657797	0.0592386	-11.1042	1.19695e-28	1.05708e-27
DZANK1	327.942	0.212581	0.125571	1.69291	0.0904731	0.150488
KDM2B	2600.48	-0.168176	0.0626612	-2.68389	0.00727702	0.0155802
CFAP61	11.9129	2.53546	0.715756	3.54236	0.000396566	0.00102945
TASP1	292.696	-0.293974	0.138908	-2.11632	0.034318	0.0637109
OAS1	562.715	-1.13327	0.102834	-11.0205	3.04531e-28	2.6591e-27
GCN1	8196.54	0.02639	0.0567871	0.464719	0.642132	0.733295
RPLP0	71414.8	-1.46719	0.0450288	-32.5834	7.05979e-233	9.00935e-231
PXN	1425.33	0.509133	0.0707301	7.19824	6.09935e-13	3.01284e-12
SIRT4	148.784	0.147023	0.180649	0.813859	0.415726	0.528862
KIF16B	1332.2	-0.150953	0.082384	-1.83231	0.0669049	0.115426
TRMT6	827.978	-0.066283	0.0881623	-0.75183	0.452153	0.564678
PEBP1	6671.62	-1.00436	0.0524649	-19.1434	1.09859e-81	2.63528e-80
BRAP	1204.76	-0.0392592	0.086034	-0.456323	0.648158	0.737543
ERP29	3291.35	-1.04379	0.0648286	-16.1008	2.51798e-58	4.16234e-57
NOS1	2.2272	2.41987	1.61421	1.49911	0.133846	0.210471
FUS	25720.5	0.584099	0.0541829	10.7801	4.27278e-27	3.60628e-26
IGBP1	1997.13	-0.984115	0.0703668	-13.9855	1.9112e-44	2.47612e-43
FXYD5	2771.91	-1.00522	0.0582609	-17.2537	1.04875e-66	1.99606e-65
ZNF302	1753.14	-0.25255	0.0829141	-3.04592	0.00231968	0.00541727
GRAMD1A	6507.23	0.15752	0.0517445	3.04419	0.00233309	0.00544559
HEPH	2.65146	-0.165871	1.22896	-0.134968	0.892637	0.926654
CDIP1	1499.84	0.491991	0.0746638	6.58942	4.41552e-11	1.96337e-10
CMTM1	221.606	-0.0848884	0.152599	-0.556283	0.578018	0.67821
KCNH4	3.07963	0.950372	1.26391	0.751928	0.452095	0.564659
GANAB	18502.1	0.196753	0.0464714	4.23386	2.29716e-05	6.81116e-05
GMIP	3520.51	0.930022	0.064195	14.4874	1.45468e-47	2.01016e-46
RBM41	1239.74	-0.352114	0.0995557	-3.53686	0.000404919	0.00104943
BIRC5	3768.52	-1.89067	0.0619712	-30.5088	1.99098e-204	1.9696e-202
LAG3	16.2089	0.521008	0.616113	0.845636	0.397756	0.511457
MLF2	3575.11	0.501317	0.0578913	8.65963	4.73279e-18	2.91987e-17
OTUB2	155.205	0.635118	0.187454	3.38813	0.00070372	0.00176765
DDX24	6192.4	-0.153495	0.056839	-2.70051	0.00692327	0.0148865
ZBTB25	1936.97	-0.810008	0.0855527	-9.46794	2.85424e-21	1.98932e-20
NECAP1	1600.94	0.826293	0.0730148	11.3168	1.08367e-29	9.86747e-29
ARHGAP4	4114.1	0.358215	0.0542484	6.60323	4.02294e-11	1.79318e-10
ANKRD24	564.568	0.676601	0.0979136	6.91018	4.84028e-12	2.27511e-11
DHX32	30.7259	1.16823	0.379511	3.07825	0.00208221	0.00489719
RCOR1	6035.82	-0.564475	0.0502298	-11.2378	2.65821e-29	2.39821e-28
GPATCH2L	3820.26	-0.000799355	0.0654901	-0.0122057	0.990261	0.993453
LTBP4	15728.5	1.58873	0.0503578	31.5488	1.86047e-218	2.1011e-216
BLVRB	908.785	-0.873124	0.0870695	-10.0279	1.14947e-23	8.69789e-23
SLC9A1	1016.84	0.346114	0.0886294	3.90518	9.41556e-05	0.000261979
SPTLC1	2842.81	0.431326	0.076388	5.64652	1.63726e-08	6.21934e-08
PAPOLA	8793.31	-0.558105	0.0578447	-9.64833	4.99607e-22	3.57484e-21
CCNK	630.922	-0.482976	0.0915812	-5.27375	1.33662e-07	4.75731e-07
PCBP4	1340.28	0.899943	0.0890064	10.111	4.93813e-24	3.7997e-23
RGS1	240.665	1.54821	0.153978	10.0547	8.75451e-24	6.65598e-23
YPEL3	3567.57	-0.191875	0.0603422	-3.17978	0.00147389	0.00354252
MRPS33	254.021	-1.2618	0.144427	-8.7366	2.40224e-18	1.49761e-17
NDUFB2	585.846	-0.102346	0.0943599	-1.08463	0.278084	0.384045
NUDC	4023.11	-0.7104	0.0660079	-10.7624	5.1828e-27	4.3542e-26
MAEA	3513.43	0.435186	0.0564358	7.71117	1.24667e-14	6.68884e-14
ICAM1	563.476	1.55396	0.102657	15.1375	9.16926e-52	1.3734e-50
STRN4	5504.71	0.421394	0.0520877	8.09009	5.96187e-16	3.38219e-15
IRAK3	38.4489	0.0973465	0.411516	0.236556	0.813001	0.866885
LYZ	9.92682	-0.068623	0.640808	-0.107088	0.914719	0.940286
SI	2.45355	-4.82962	1.6938	-2.85135	0.0043534	0.00969816
MUL1	976.561	0.580868	0.0884961	6.56377	5.24638e-11	2.32269e-10
TFAP4	715.335	-1.18436	0.09864	-12.0068	3.27075e-33	3.25329e-32
PDCD7	2156.25	-0.568094	0.0655794	-8.66269	4.60777e-18	2.84343e-17
SPG21	2291.28	-0.662545	0.0660634	-10.0289	1.13746e-23	8.61468e-23
DNAJB11	1572.05	1.14389	0.0730399	15.6612	2.78471e-55	4.4283e-54
THPO	82.634	3.93208	0.340204	11.558	6.72519e-31	6.33384e-30
CHRD	1127.56	2.47841	0.089496	27.6929	8.49317e-169	5.65982e-167
FLT3LG	31.8176	1.55917	0.421114	3.70248	0.000213502	0.000572937
RAB11FIP3	3239.06	0.518144	0.0659114	7.86123	3.80385e-15	2.08472e-14
GNPTG	1231.89	0.28939	0.0740072	3.91029	9.21851e-05	0.000256832
ZNF268	270.503	0.665382	0.138155	4.8162	1.46316e-06	4.82422e-06
GOLGA3	3654.89	1.27043	0.0634877	20.0107	4.4467e-89	1.17366e-87
PABPC4	5794.5	-0.444652	0.0546279	-8.13965	3.96414e-16	2.26701e-15
CERS4	2607.97	-0.120203	0.058868	-2.04191	0.0411601	0.0750218
MCOLN1	613.052	0.394031	0.110269	3.57337	0.000352415	0.000919609
USP48	5239.42	-0.10367	0.0516138	-2.00858	0.0445817	0.0804766
EFNB1	1067.84	-0.722613	0.0870563	-8.30053	1.03644e-16	6.07279e-16
PDPR	3288.11	0.062115	0.0561648	1.10594	0.268752	0.37346
AARS1	14102.5	-0.471188	0.0528137	-8.92171	4.5916e-19	2.96162e-18
GLG1	13504.7	2.06536	0.0507119	40.7272	0	0
KIF4A	2092.1	-1.47852	0.0767458	-19.2651	1.05462e-82	2.56352e-81
TNRC6A	4554.58	0.457834	0.0557729	8.20891	2.23207e-16	1.2886e-15
PLEKHG2	10976.9	1.2972	0.0474748	27.3239	2.20493e-164	1.40691e-162
DLL3	598.03	0.532629	0.106046	5.0226	5.09757e-07	1.74334e-06
NAT14	871.444	0.452428	0.0844257	5.35889	8.37355e-08	3.02546e-07
PITPNM2	2148.38	-0.366986	0.0620715	-5.91231	3.37347e-09	1.33781e-08
EXOC1	1331.6	-0.264377	0.072153	-3.66412	0.000248193	0.000660547
RBM27	1360.33	-0.261289	0.10734	-2.43421	0.0149243	0.0300665
POU4F3	4.29526	2.35768	1.16145	2.02995	0.0423617	0.0769206
OSBPL8	3497.53	-0.952851	0.240297	-3.9653	7.33022e-05	0.000206477
DTX2	822.28	-0.148514	0.0867325	-1.71233	0.0868367	0.145209
NLRC4	18.4692	0.595005	0.540322	1.10121	0.270807	0.375846
PUS7	500.695	-0.596426	0.103288	-5.7744	7.72277e-09	3.00058e-08
LAMB4	3.3205	-0.162047	1.23532	-0.131179	0.895634	0.928553
NRCAM	30.05	6.4051	1.07924	5.93481	2.94188e-09	1.17047e-08
LAMB1	527.336	0.325289	0.109782	2.96304	0.0030462	0.0069615
SLC26A4	20.3163	2.64355	0.568568	4.6495	3.32747e-06	1.06185e-05
SLC26A3	2.2792	-4.72318	1.7548	-2.69158	0.00711141	0.01526
DLD	2413.11	-0.44433	0.0633066	-7.01871	2.23928e-12	1.07674e-11
WDR7	772.962	0.523083	0.0996202	5.25077	1.51464e-07	5.37442e-07
TXNL1	2501.38	-0.18503	0.0604012	-3.06335	0.00218871	0.00513205
ABCC6	18.4007	0.817721	0.535003	1.52844	0.126403	0.200471
CMTM6	3939.34	-0.837623	0.0804347	-10.4137	2.14693e-25	1.71828e-24
ITGA6	456.722	0.107041	0.110396	0.969611	0.332241	0.443828
RAPGEF4	14.2507	-0.165031	0.572297	-0.288366	0.773066	0.838118
MAP3K20	2528.15	-0.932104	0.0611462	-15.2439	1.8086e-52	2.74767e-51
FH	3030.2	-0.966611	0.0575409	-16.7987	2.49516e-63	4.45967e-62
SEL1L3	271.71	0.0905512	0.145495	0.622368	0.5337	0.639723
TF	794.864	1.09157	0.0998779	10.929	8.37295e-28	7.21725e-27
CDV3	4905.96	-0.946938	0.0543101	-17.4358	4.41593e-68	8.54495e-67
MYO15A	35.7621	2.03635	0.397041	5.12882	2.91566e-07	1.01481e-06
ALKBH5	3454.56	-0.480112	0.056622	-8.47925	2.26648e-17	1.36047e-16
APOH	4.53683	5.55204	1.50402	3.69146	0.000222968	0.000597273
NLRP1	2156.22	-0.0721938	0.0676311	-1.06746	0.285762	0.392885
PITPNM3	200.599	0.255252	0.168211	1.51745	0.129153	0.204198
SPAG7	1490.44	0.0707077	0.0738119	0.957945	0.33809	0.450017
ORC6	3366.37	-0.870808	0.0560214	-15.5442	1.74193e-54	2.72923e-53
ZC3HC1	961.428	0.174166	0.0803972	2.16632	0.0302869	0.0568516
ESR1	158.449	0.173267	0.173233	1.00019	0.317216	0.427472
RGS17	154.32	-1.19588	0.24909	-4.80101	1.57866e-06	5.19229e-06
ANGPT2	9.2155	1.1942	0.719891	1.65886	0.097143	0.160074
TMEM101	1057.92	-0.166511	0.0798129	-2.08626	0.036955	0.0681652
CD200	1546.2	0.186886	0.0730233	2.55927	0.0104894	0.0218031
CCDC80	28.4472	4.27032	0.646686	6.60339	4.0186e-11	1.79156e-10
PSME1	7505.04	-1.12277	0.0562954	-19.9442	1.6844e-88	4.4003e-87
PPP2R3C	770.359	-0.311985	0.0906845	-3.44033	0.000581001	0.00147463
HAUS4	957.102	-1.58263	0.107218	-14.761	2.61531e-49	3.73535e-48
JPH4	5.73958	2.15709	0.991182	2.17628	0.0295345	0.0556355
CEBPE	269.403	-0.416414	0.136069	-3.06032	0.00221103	0.00517964
SLC7A8	22.1203	3.25162	0.593916	5.47489	4.37776e-08	1.61325e-07
OSGEP	3910.1	0.168022	0.0560547	2.99747	0.00272234	0.00628627
RNF31	107.744	0.978613	0.21257	4.60373	4.14995e-06	1.31365e-05
SCFD1	1754.45	0.545966	0.0772488	7.06763	1.576e-12	7.62835e-12
G2E3	2161.52	-1.00257	0.292526	-3.42727	0.000609676	0.00154357
HECTD1	5017.29	0.0395205	0.0506374	0.78046	0.43512	0.547855
HNRNPC	27561.7	-0.827011	0.0477401	-17.3232	3.14376e-67	6.01937e-66
RPGRIP1	39.7646	-0.795263	0.339203	-2.3445	0.0190525	0.0375591
SUPT16H	12602.6	-1.22784	0.0545347	-22.5149	2.96292e-112	1.04596e-110
TOX4	2749.6	0.160625	0.0603557	2.66131	0.00778383	0.0165694
GEMIN2	714.383	-0.416629	0.0898794	-4.63542	3.56214e-06	1.13405e-05
TGM1	102.897	-0.220432	0.208181	-1.05885	0.289669	0.396866
TINF2	1576.97	-0.107662	0.0700399	-1.53716	0.124254	0.197674
DAZL	39.4051	8.67076	1.21725	7.12323	1.05428e-12	5.14107e-12
SEMA6A	744.828	0.325015	0.0851611	3.81647	0.000135377	0.000371482
TRPM7	4167.04	-0.0611164	0.0623048	-0.980926	0.326629	0.437683
TYRO3	1563.81	-1.52291	0.0691165	-22.0339	1.36321e-107	4.54219e-106
WDR76	3440.51	-2.20049	0.0584144	-37.6703	0	0
CAPN3	613.329	1.40615	0.113711	12.366	3.99293e-35	4.15118e-34
SNAP23	740.882	0.190087	0.0875359	2.17153	0.0298909	0.0562283
TBX15	2.79025	0.349132	1.22014	0.28614	0.774771	0.83936
PHGDH	16475.3	-1.7909	0.05229	-34.2494	4.45652e-257	6.811e-255
COL9A3	1371.08	-0.694995	0.072208	-9.6249	6.27698e-22	4.47631e-21
EZR	5055	-0.846773	0.0570963	-14.8306	9.28867e-50	1.3381e-48
MYL6	4203.54	0.968426	0.0605171	16.0025	1.22696e-57	2.01258e-56
AGO1	2710.87	0.218429	0.0582328	3.75096	0.000176157	0.000477492
TEKT2	21.0453	1.58713	0.474899	3.34204	0.000831651	0.00207105
CLSPN	1534.97	-1.64849	0.0750119	-21.9764	4.84631e-107	1.60223e-105
RFFL	593.494	-0.579127	0.0962051	-6.01971	1.74727e-09	7.04177e-09
UNC13D	4715.39	0.575736	0.0551568	10.4382	1.65968e-25	1.33166e-24
MFSD11	1014.92	-0.219263	0.0862187	-2.5431	0.0109874	0.0227475
DPYSL2	4808.5	-0.452688	0.0530282	-8.53673	1.38076e-17	8.35494e-17
TGFB2	138.876	8.62682	1.03471	8.33741	7.59357e-17	4.47807e-16
GPATCH2	482.448	0.335751	0.147878	2.27046	0.0231795	0.0448155
NUP50	5013.02	-0.844955	0.0571897	-14.7746	2.13631e-49	3.05806e-48
CDC45	3487.13	-1.43563	0.0651614	-22.032	1.42188e-107	4.73151e-106
COMT	2599.39	-0.434698	0.0624996	-6.95522	3.52022e-12	1.66691e-11
ADA2	775.312	-0.204634	0.0886561	-2.30818	0.0209893	0.0409596
	5.65164	4.8617	1.43543	3.38693	0.000706782	0.00177481
VNN3P	7.11186	3.19265	0.998225	3.19833	0.00138227	0.00333961
ECHDC1	2023.97	-0.111367	0.0849359	-1.31119	0.189795	0.281767
LRRFIP2	882.701	0.359134	0.0848211	4.23402	2.29555e-05	6.80748e-05
SEC22C	1196.85	-0.447816	0.0731683	-6.12036	9.33657e-10	3.83423e-09
XYLB	156.701	-1.13151	0.18732	-6.04052	1.53621e-09	6.21769e-09
HDAC6	6725.64	0.839426	0.0552745	15.1865	4.3452e-52	6.55452e-51
CDC6	3771.24	-1.78441	0.0590696	-30.2086	1.82626e-200	1.71999e-198
UPRT	443.262	-0.11665	0.111063	-1.0503	0.29358	0.401319
CDC23	2714.67	-0.687766	0.0616899	-11.1488	7.26157e-29	6.44875e-28
AAAS	3490.01	-0.528022	0.0611761	-8.63117	6.07271e-18	3.72671e-17
CBX5	18253.9	-1.57382	0.0450966	-34.8988	7.74918e-267	1.25976e-264
SUCO	2332.33	0.677631	0.0896987	7.55453	4.20389e-14	2.19644e-13
MSH2	4665.21	-1.22992	0.0573996	-21.4273	7.42902e-102	2.3039e-100
MAP3K1	4208.16	2.34515	0.0827426	28.3428	1.02746e-176	7.49252e-175
DHPS	289.289	0.420806	0.13916	3.0239	0.00249538	0.00579681
HOOK2	2343.7	1.03087	0.0654427	15.7523	6.62085e-56	1.06413e-54
ARCN1	7143.65	0.332398	0.0492169	6.75374	1.44077e-11	6.59601e-11
TMEM38B	816.033	-1.57609	0.252264	-6.24779	4.1629e-10	1.74323e-09
PSMD5	1950.03	0.214765	0.0655208	3.27782	0.00104614	0.00257082
PTGS1	495.453	1.36191	0.106673	12.7672	2.49855e-37	2.74873e-36
NUP188	4924.49	-0.430297	0.0575095	-7.4822	7.30899e-14	3.77244e-13
CRAT	2923.83	0.113599	0.0589334	1.92758	0.0539072	0.0955135
SH2D3C	3178.74	-1.67418	0.0650335	-25.7433	3.83413e-146	2.04725e-144
NANS	839.926	-0.722644	0.102234	-7.06853	1.56583e-12	7.58342e-12
TBC1D2	237.587	-0.0765287	0.16476	-0.464486	0.6423	0.733355
WHRN	737.935	1.86327	0.0926338	20.1144	5.51859e-90	1.47026e-88
PDE6C	61.7215	0.214609	0.285356	0.752072	0.452008	0.564578
CWF19L1	1301.31	-0.572883	0.101465	-5.6461	1.64128e-08	6.23275e-08
SEMA4G	509.879	0.96225	0.103344	9.31109	1.26528e-20	8.62775e-20
BTAF1	8493.15	0.752269	0.0555522	13.5416	8.87765e-42	1.08103e-40
IKZF5	1790.38	-0.0993325	0.104914	-0.9468	0.343741	0.456088
BLNK	3993.96	-1.56665	0.0552945	-28.3328	1.36368e-176	9.91604e-175
TLL2	235.889	-0.0466104	0.145292	-0.320804	0.748359	0.817758
CYP26A1	3.60344	0.363562	1.20236	0.302374	0.762367	0.829372
SORBS1	302.037	-0.238731	0.130584	-1.82818	0.0675222	0.116389
BAMBI	1185.1	3.41154	0.0936608	36.4244	1.75149e-290	3.57627e-288
IL11	27.7801	-0.619903	0.421781	-1.46973	0.141636	0.220586
WAC	8868.38	-0.253445	0.0497723	-5.09209	3.54146e-07	1.22611e-06
CREM	349.029	0.072046	0.137732	0.523088	0.600913	0.697934
NUBP2	2909.15	-0.307566	0.0640656	-4.8008	1.58035e-06	5.19717e-06
SMIM24	951.755	0.152058	0.0847321	1.79457	0.0727225	0.12433
HIVEP1	1515.03	1.4805	0.0765963	19.3286	3.08423e-83	7.5401e-82
FKBP5	3373.98	-1.59625	0.060067	-26.5745	1.33752e-155	7.99472e-154
SRPK1	1700.38	-1.21783	0.0726451	-16.7641	4.46732e-63	7.93454e-62
BRPF3	3119.99	0.555518	0.0640424	8.67421	4.16429e-18	2.57599e-17
MRPS18A	435.25	-0.661951	0.111493	-5.93716	2.90007e-09	1.15437e-08
PGC	3.28108	0.421903	1.16478	0.362217	0.71719	0.793035
TMEM14A	571.126	-0.346273	0.132125	-2.6208	0.00877244	0.0185148
EFHC1	661.543	-0.0706798	0.100157	-0.705693	0.480379	0.591476
HSP90AB1	45441.8	-1.55988	0.0500148	-31.1883	1.53388e-213	1.67304e-211
MLN	6.00172	0.893019	0.914565	0.976442	0.328845	0.440145
CDC5L	2388.11	-0.602128	0.0639148	-9.42079	4.47724e-21	3.10271e-20
ITPR3	3983.44	-1.69992	0.058222	-29.1971	2.10917e-187	1.7535e-185
ZNF184	1358.42	-0.557788	0.0812429	-6.86568	6.61771e-12	3.08613e-11
SIRT1	1512.15	-0.22495	0.0843719	-2.66617	0.00767211	0.0163547
HNRNPH3	7747.22	-0.095814	0.064172	-1.49308	0.135416	0.212508
IFT74	68.4376	0.728984	0.263627	2.76521	0.0056887	0.0124319
JAK2	1915.67	0.909432	0.221769	4.10082	4.11695e-05	0.000119121
IL12RB1	267.843	-0.374671	0.134347	-2.78882	0.00529006	0.0116185
ABL1	5312.61	0.376439	0.0542908	6.93375	4.09814e-12	1.9334e-11
ACOT7	2498.23	-1.51167	0.0677551	-22.3108	2.89979e-110	9.94776e-109
SH3GLB1	4552.32	0.236239	0.0528826	4.46724	7.92365e-06	2.46298e-05
CDC7	3723.46	-0.723016	0.0700541	-10.3208	5.6733e-25	4.4705e-24
PCSK5	178.937	-0.711271	0.161191	-4.41259	1.02141e-05	3.13524e-05
SCD	3.21978	1.42022	1.25342	1.13308	0.257181	0.360325
TMED1	216.683	-0.279246	0.152647	-1.82936	0.0673454	0.116115
ABLIM1	544.487	-1.80956	0.111948	-16.1643	9.01263e-59	1.49759e-57
ERMP1	1481.63	-0.579116	0.0751262	-7.70858	1.27224e-14	6.82174e-14
RAB18	2667.32	0.406786	0.089168	4.56201	5.0665e-06	1.59566e-05
NRP1	664.642	1.98017	0.0979741	20.2112	7.80563e-91	2.11041e-89
HSD17B7P2	5.77396	0.0837947	0.891268	0.0940174	0.925095	0.946987
PRTFDC1	7.13808	-0.2314	0.769003	-0.300909	0.763484	0.830174
TSPAN15	365.003	0.187213	0.131675	1.42178	0.155091	0.238083
MACROH2A2	9.14081	0.683942	0.793244	0.862209	0.388573	0.502536
WASHC2A	1331.59	0.300212	0.073443	4.08769	4.35695e-05	0.000125766
MAST3	2976.16	0.80319	0.0609639	13.1748	1.22481e-39	1.42874e-38
MZF1	2123.06	0.922337	0.0635254	14.5192	9.15805e-48	1.27033e-46
OCEL1	520.338	-0.236018	0.10046	-2.34937	0.0188052	0.037106
MYO9B	11162.1	0.00682475	0.0498482	0.136911	0.891101	0.925552
KCNK6	679.308	0.407077	0.103052	3.95022	7.80778e-05	0.000219324
CATSPERG	331.179	1.16136	0.135615	8.5636	1.094e-17	6.64656e-17
PSMD8	4987.98	-0.246177	0.0533875	-4.61114	4.00467e-06	1.2697e-05
FBXL19	4235.56	0.210682	0.0578467	3.64208	0.000270443	0.000716476
STX1B	1166.12	-0.980863	0.0796514	-12.3144	7.57359e-35	7.83229e-34
HSD3B7	76.521	0.877028	0.266431	3.29176	0.000995624	0.00245544
SETD1A	2937.5	-0.445325	0.0666764	-6.6789	2.40748e-11	1.08697e-10
BCL7C	381.315	-0.137713	0.124977	-1.10191	0.270502	0.375504
EFNA2	560.004	0.408901	0.101243	4.0388	5.37245e-05	0.000153896
CIRBP	12700.3	0.769007	0.053645	14.3351	1.32055e-46	1.78803e-45
ATP5F1D	3477.72	-0.660205	0.0572537	-11.5312	9.18395e-31	8.61139e-30
CBARP	830.333	1.01169	0.0888152	11.3909	4.64013e-30	4.26621e-29
IGFALS	42.1974	1.17228	0.359567	3.26025	0.00111313	0.00272652
HNRNPM	7695.12	-0.00339793	0.053318	-0.0637295	0.949186	0.96527
MARCHF2	654.181	1.45055	0.0998676	14.5247	8.44627e-48	1.17224e-46
NDUFB7	1657.69	-0.422293	0.0784291	-5.38439	7.26904e-08	2.63946e-07
TECR	4860.67	-0.55615	0.0544393	-10.216	1.68182e-24	1.31029e-23
TIMM13	1270.03	-0.599114	0.0736198	-8.13794	4.02045e-16	2.29767e-15
CDC34	2320.69	0.464631	0.0650976	7.13746	9.50711e-13	4.64758e-12
MISP	17.135	0.652946	0.528783	1.23481	0.216902	0.313955
CEP170B	1701.91	1.15017	0.067988	16.9173	3.35724e-64	6.09437e-63
POLR2E	5053.77	-0.300488	0.0517341	-5.80831	6.31072e-09	2.46357e-08
POLRMT	3512.83	0.207004	0.0589102	3.51389	0.000441589	0.00113926
HCN2	46.8112	-0.225339	0.307916	-0.731821	0.464278	0.576127
CDHR5	39.2249	-0.739001	0.341224	-2.16574	0.0303312	0.0569307
IZUMO4	325.45	1.56984	0.134169	11.7004	1.26818e-31	1.2182e-30
RASSF7	821.074	-0.156405	0.094102	-1.66208	0.096496	0.159151
GADD45B	1446.37	0.259717	0.0942475	2.75569	0.00585688	0.01277
PALM	6417.37	0.292423	0.0503528	5.80748	6.34218e-09	2.47548e-08
MADCAM1	109.685	0.240233	0.207322	1.15874	0.246561	0.348784
MKNK2	5950.83	-0.136425	0.0508491	-2.68294	0.00729785	0.0156195
ARVCF	2151.4	0.969451	0.0727702	13.3221	1.72221e-40	2.04161e-39
TRMT2A	2459.57	0.42306	0.0667142	6.34138	2.2772e-10	9.68199e-10
RANBP1	6508.55	-1.36919	0.057293	-23.8981	3.20502e-126	1.35658e-124
ZDHHC8	4702.46	0.469294	0.0575694	8.1518	3.58533e-16	2.05268e-15
KLHL22	1314.57	0.0453994	0.0737634	0.615473	0.538243	0.643717
MED15	4180.48	0.0518323	0.05315	0.975207	0.329457	0.440779
SERPIND1	1.90858	2.15229	1.90079	1.13231	0.257503	0.360655
SNAP29	1113.85	-0.229754	0.0738041	-3.11302	0.00185182	0.00439174
CRKL	8202.83	-1.08586	0.0494172	-21.9733	5.18573e-107	1.71002e-105
LZTR1	1406.28	1.27129	0.0727596	17.4724	2.32421e-68	4.52484e-67
MMP11	1476.49	1.32002	0.0772775	17.0816	2.03504e-65	3.77749e-64
CECR2	602.734	-1.80652	0.10336	-17.478	2.10856e-68	4.11757e-67
SMARCB1	6234.68	-0.473014	0.0521649	-9.06767	1.21585e-19	8.01243e-19
DERL3	432.243	-0.961427	0.112981	-8.5096	1.74536e-17	1.05163e-16
BCL2L13	2055.12	-0.240364	0.0700049	-3.43353	0.000595778	0.00150988
DDTL	4.21216	-0.993831	1.01227	-0.98178	0.326208	0.43728
DDT	44.0194	-0.0775598	0.314811	-0.246369	0.805396	0.860738
OSM	27.3332	-0.446865	0.418406	-1.06802	0.285512	0.392647
CABIN1	2625.39	-0.289811	0.0605882	-4.7833	1.72444e-06	5.64413e-06
TBC1D10A	558.196	-0.272838	0.107363	-2.54127	0.0110452	0.0228578
SUSD2	10.0258	1.12323	0.734162	1.52994	0.126031	0.199981
SF3A1	6309.86	-0.345762	0.0604087	-5.72371	1.04225e-08	4.01408e-08
GGT5	113.778	1.47233	0.218461	6.73955	1.58882e-11	7.25687e-11
RNF215	1567.91	1.08345	0.0704292	15.3836	2.10958e-53	3.25335e-52
SEC14L2	214.14	0.594007	0.158097	3.75724	0.0001718	0.000465929
SEC14L3	2.57534	-2.16375	1.55855	-1.38831	0.165043	0.251066
SPECC1L	1421.96	0.0437563	0.0705582	0.620145	0.535162	0.640894
PPIL2	3601.4	0.6491	0.055029	11.7956	4.11267e-32	3.98208e-31
UPB1	25.2003	1.22945	0.432246	2.84434	0.00445041	0.00989786
YPEL1	1289.09	-0.462473	0.070799	-6.5322	6.48109e-11	2.85152e-10
SNRPD3	2331.57	-0.759351	0.0634089	-11.9755	4.77817e-33	4.73237e-32
PES1	1694.93	-0.215959	0.0687887	-3.13946	0.0016926	0.00403514
MAPK1	5113.82	-0.558852	0.0543626	-10.2801	8.66472e-25	6.79415e-24
GGT1	34.819	1.35052	0.390768	3.45606	0.000548127	0.00139675
PPM1F	2654.01	-0.8245	0.0615751	-13.3901	6.90477e-41	8.27761e-40
SLC35E4	106.372	1.28135	0.231822	5.52732	3.25164e-08	1.20821e-07
TOP3B	28.1911	0.123888	0.394855	0.313755	0.753707	0.822194
CYTH4	905.484	0.444463	0.081833	5.43133	5.59342e-08	2.04528e-07
ESS2	1155.73	0.0452331	0.0870844	0.519417	0.60347	0.700203
MFNG	1618.25	-0.873835	0.0673763	-12.9695	1.82277e-38	2.07227e-37
CARD10	20.3173	1.9387	0.552114	3.5114	0.000445747	0.00114929
SLC25A1	4246.15	-0.430484	0.0560672	-7.678	1.61586e-14	8.62074e-14
GRK3	2395.8	-0.612295	0.0666552	-9.186	4.07716e-20	2.73198e-19
GGA1	6480.83	0.772402	0.0539041	14.3292	1.43788e-46	1.94175e-45
HIRA	467.478	0.133919	0.115267	1.16182	0.245309	0.347583
SH3BP1	413.009	-0.0822269	0.114396	-0.718793	0.472269	0.583913
SEZ6L	20.1491	-1.85041	0.550527	-3.36117	0.000776131	0.00194037
LGALS1	3757.17	0.763179	0.0543774	14.0349	9.53703e-45	1.24892e-43
HPS4	33073.6	-1.60256	0.0457391	-35.037	6.14132e-269	1.01126e-266
PIK3IP1	187.202	-0.351533	0.163192	-2.1541	0.0312322	0.0584885
SRRD	1897.36	-2.3308	0.0816063	-28.5615	2.02175e-179	1.52216e-177
PATZ1	3170.78	-0.32968	0.0577938	-5.70441	1.16745e-08	4.4814e-08
TRIOBP	1911.62	0.260919	0.0636551	4.09895	4.15025e-05	0.000120058
TFIP11	2222.63	-0.301714	0.0630656	-4.78413	1.71729e-06	5.62246e-06
GCAT	797.116	0.378707	0.101289	3.73886	0.000184856	0.000499532
ANKRD54	1097.41	0.00905087	0.0891282	0.101549	0.919115	0.942951
EIF3L	9578.63	-1.16218	0.048338	-24.0428	9.93144e-128	4.27454e-126
SNU13	2428.98	-1.00421	0.0670964	-14.9667	1.21152e-50	1.78325e-49
MICALL1	1824.98	0.209084	0.0635087	3.2922	0.000994054	0.00245204
POLR2F	803.671	0.0962552	0.0885967	1.08644	0.277283	0.383084
SOX10	10.8032	0.457723	0.691895	0.66155	0.50826	0.616701
CCDC134	1492.94	-0.3245	0.0762332	-4.25667	2.07496e-05	6.17887e-05
DEPDC5	777.485	0.0100378	0.0879656	0.11411	0.90915	0.937356
PICK1	1513.53	1.96855	0.0821374	23.9666	6.20952e-127	2.64143e-125
TTC28	1596.72	-0.0789997	0.0706619	-1.118	0.263569	0.367514
SLC16A8	266.473	2.70683	0.161028	16.8097	2.07261e-63	3.70702e-62
CENPM	1203.56	-1.65426	0.08072	-20.4938	2.44655e-93	6.86191e-92
SEPTIN3	2322.45	0.161852	0.0624216	2.59289	0.00951745	0.0199453
SLC5A1	1.91363	2.15642	1.70312	1.26616	0.205457	0.301235
KDELR3	11.3159	2.28358	0.706411	3.23266	0.00122644	0.00298631
CYP2D6	424.445	0.822418	0.115847	7.09916	1.25517e-12	6.10318e-12
DDX17	86660.7	0.992809	0.0432841	22.937	1.98573e-116	7.48622e-115
DMC1	692.212	-0.463486	0.0937736	-4.94261	7.70833e-07	2.59757e-06
TCF20	2881.85	-0.508893	0.0632603	-8.04443	8.66446e-16	4.87959e-15
HSCB	229.867	-0.10591	0.152529	-0.694362	0.487455	0.598025
CBY1	451.428	0.763657	0.122066	6.25611	3.94687e-10	1.65439e-09
TOMM22	1891.12	-0.728716	0.0649743	-11.2154	3.42481e-29	3.07462e-28
RSPH14	15.1572	-0.38617	0.538991	-0.716469	0.473702	0.585458
XBP1	11349.3	-0.213743	0.0492078	-4.34369	1.40109e-05	4.23596e-05
RTCB	2918.94	-0.501245	0.0598834	-8.37034	5.74504e-17	3.39816e-16
JOSD1	3388.46	-0.330581	0.0567886	-5.82125	5.84078e-09	2.28466e-08
FBXO7	3644.71	-0.264316	0.0591871	-4.46577	7.97824e-06	2.47904e-05
GTPBP1	4648.45	-0.233268	0.0589434	-3.9575	7.57396e-05	0.000213061
POLDIP3	4.92461	0.422085	1.08746	0.38814	0.697913	0.77838
RAB36	17.2642	1.33214	0.527929	2.52333	0.0116249	0.0239353
PPP6R2	3801.35	0.489997	0.0572882	8.55319	1.19735e-17	7.26065e-17
SBF1	14818.6	0.219055	0.0506861	4.3218	1.54762e-05	4.66184e-05
SUN2	5871.91	0.0367225	0.0546761	0.671637	0.501815	0.610972
CYB5R3	2600.14	0.50268	0.0643024	7.81744	5.3908e-15	2.93806e-14
DNAL4	506.566	0.311617	0.100706	3.09431	0.0019727	0.00465938
MIOX	5.15419	1.42073	0.925387	1.53528	0.124715	0.198333
LMF2	5779.1	0.144729	0.0534493	2.70778	0.00677346	0.014589
RHBDD3	1436.48	0.216522	0.0714523	3.0303	0.00244314	0.00568478
PACSIN2	2334.84	-0.534112	0.0601331	-8.88216	6.55753e-19	4.18838e-18
TTLL1	493.912	-0.255597	0.103095	-2.47922	0.013167	0.0268055
RASL10A	21.2863	0.468313	0.50092	0.934906	0.349837	0.462612
AP1B1	6191.46	-0.367793	0.0516124	-7.12607	1.03277e-12	5.041e-12
HMGXB4	2537.62	-0.627641	0.0593849	-10.569	4.1476e-26	3.38858e-25
TOM1	1164.44	0.515773	0.0803404	6.41984	1.36419e-10	5.89042e-10
NEFH	33.5165	-0.222639	0.378315	-0.5885	0.556197	0.659136
CHKB	111.822	0.876772	0.200842	4.36549	1.26837e-05	3.84883e-05
BIK	10.339	-0.444876	0.657681	-0.676431	0.498767	0.608302
HMOX1	11.6738	1.01999	0.641126	1.59094	0.111623	0.180406
MCAT	471.424	-0.699444	0.106393	-6.57418	4.89218e-11	2.16852e-10
THOC5	2592.04	0.223835	0.061887	3.61683	0.000298232	0.000786014
MCM5	13772.9	-1.62961	0.0528521	-30.8334	9.34359e-209	9.85439e-207
APOBEC3H	447.769	1.62081	0.116133	13.9564	2.87482e-44	3.69829e-43
ARSA	2361.29	1.60332	0.065987	24.2975	2.0833e-130	9.18344e-129
TSPO	2351.91	-0.294058	0.0629794	-4.66912	3.02493e-06	9.687e-06
RASD2	696.441	2.54634	0.112327	22.669	9.06992e-114	3.27892e-112
TTLL12	1880.86	-1.17643	0.0682146	-17.2461	1.19786e-66	2.27646e-65
CBX7	762.958	-0.609231	0.0871617	-6.98967	2.75536e-12	1.31522e-11
ACR	4.60488	0.250865	0.931021	0.269452	0.787582	0.848807
CABP7	15.052	1.12637	0.593477	1.89792	0.057707	0.101541
RPL3	72738.6	-0.956565	0.0499557	-19.1483	1.00087e-81	2.40312e-80
ZMAT5	427.269	-0.303578	0.112579	-2.69658	0.0070056	0.015047
RBFOX2	29583.1	4.92098	0.0498275	98.7603	0	0
SYNGR1	3840.29	-1.02575	0.0543573	-18.8704	1.99598e-79	4.63543e-78
TAB1	2234.68	-0.0543941	0.065342	-0.832452	0.405154	0.518575
ASCC2	2409.55	0.270232	0.0620923	4.3521	1.3484e-05	4.08343e-05
MTMR3	497.368	0.457673	0.120568	3.79598	0.00014706	0.000402124
MIEF1	2316.72	-0.546533	0.0694596	-7.86835	3.59358e-15	1.97118e-14
APOL4	2.57052	1.41952	1.64568	0.862577	0.38837	0.502325
APOL1	553.337	0.310297	0.109235	2.84064	0.00450235	0.0100047
MYH9	27683.4	-0.560002	0.0496034	-11.2896	1.47713e-29	1.34215e-28
CACNA1I	58.2401	3.44285	0.40088	8.58823	8.83203e-18	5.38638e-17
SAMM50	1942.75	-0.531674	0.0654594	-8.1222	4.57816e-16	2.60706e-15
TXN2	1917.6	-0.666773	0.0767497	-8.68763	3.70091e-18	2.29323e-17
FOXRED2	2135.87	-0.575238	0.0613244	-9.38025	6.58181e-21	4.53652e-20
GRAP2	5.46096	1.53607	1.00684	1.52563	0.127102	0.201367
EIF3D	7827.85	-0.932838	0.053786	-17.3435	2.20846e-67	4.23809e-66
TNRC6B	2813.52	-0.0152456	0.0598848	-0.254583	0.799045	0.856391
SGSM3	234.352	0.960507	0.148196	6.48133	9.09181e-11	3.96871e-10
IFT27	2570.56	0.915392	0.0628967	14.5539	5.51755e-48	7.68273e-47
KIAA0930	2554.68	-0.108663	0.0636244	-1.70788	0.0876587	0.146268
NCF4	5578.65	0.540358	0.0529823	10.1988	2.00644e-24	1.55939e-23
CSF2RB	3442.77	1.8015	0.0612767	29.3994	5.59686e-190	4.80972e-188
SLC25A17	1032.53	-0.160455	0.0811511	-1.97724	0.0480145	0.0859939
FAM118A	1822.51	-0.536219	0.0691059	-7.75938	8.53471e-15	4.61997e-14
KCTD17	873.001	0.331794	0.0872112	3.80448	0.0001421	0.00038906
ST13	11081.2	-0.767221	0.0475102	-16.1485	1.16277e-58	1.9296e-57
IL2RB	18.9842	1.5204	0.51269	2.96553	0.00302165	0.00691238
[truncated: 23,527 more rows]
